# Supplementary material for: Hyperglycemia in Acute COVID-19 is Characterized by Adipose Tissue Dysfunction and Insulin Resistance
Source: bioRxiv or medRxiv preprint supplement (doi:10.1101/2021.03.21.21254072), 2021-03-26

ID 2 C-A+

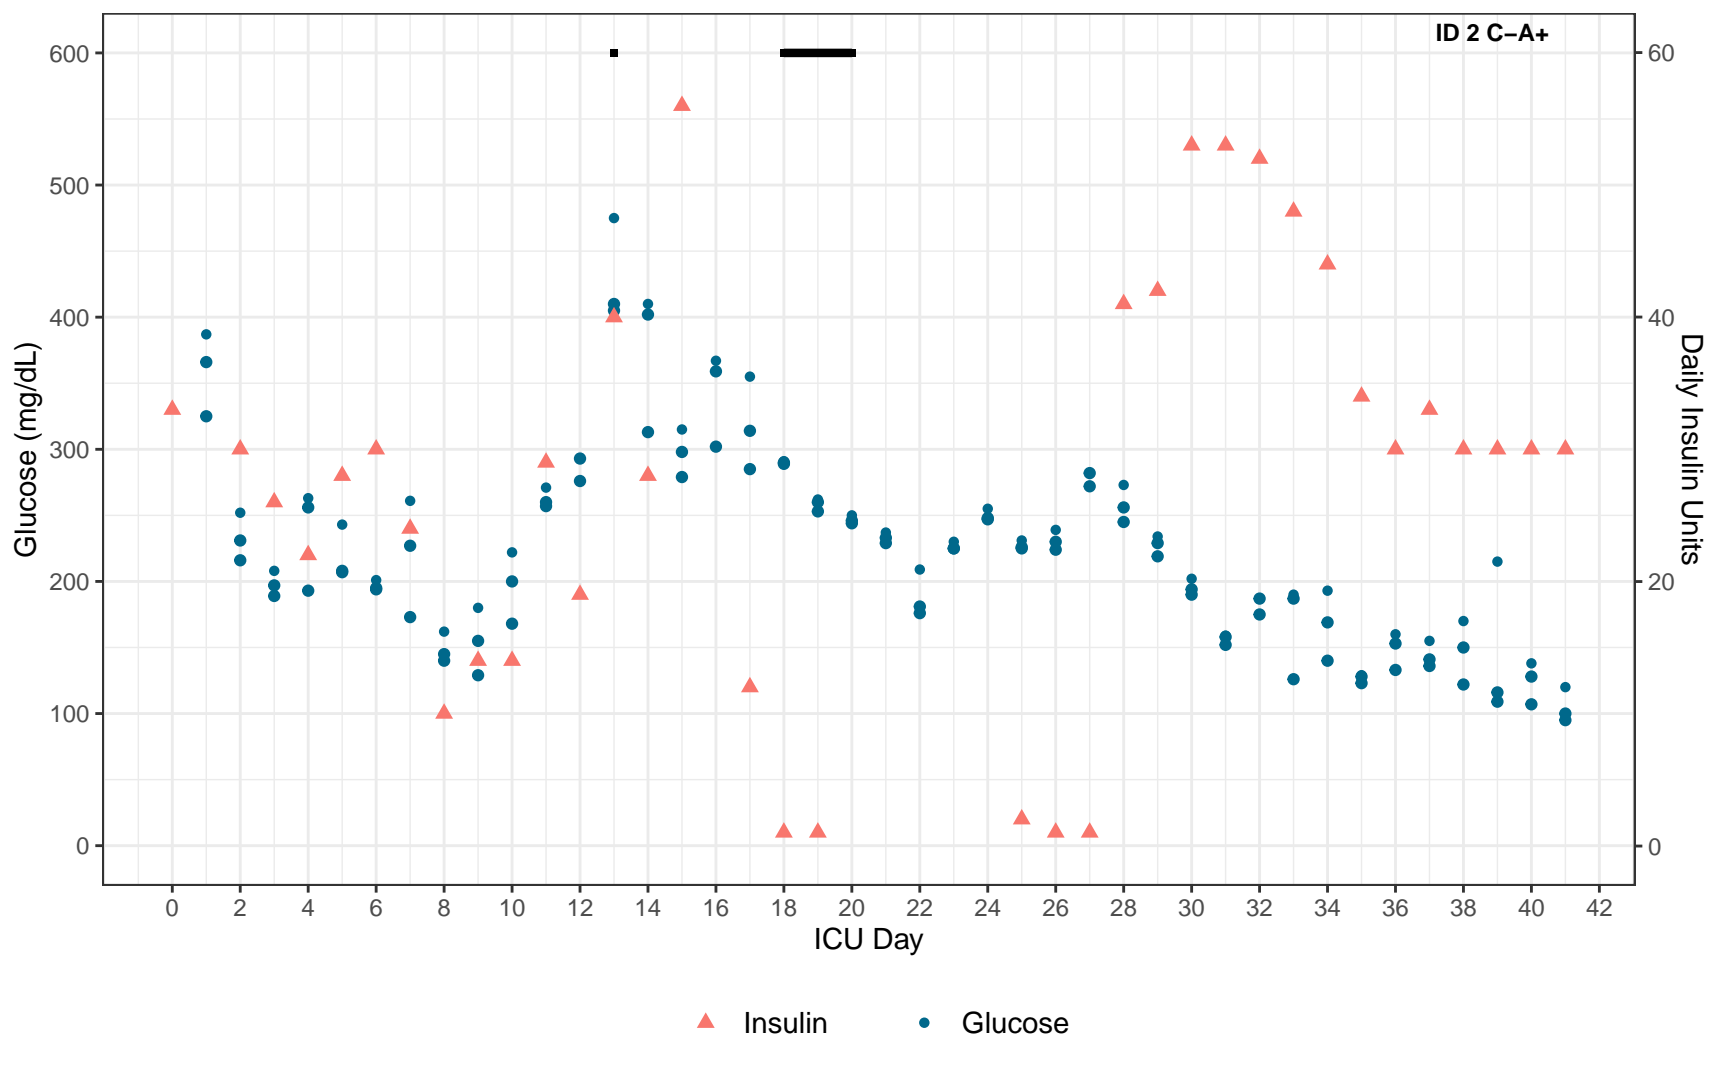

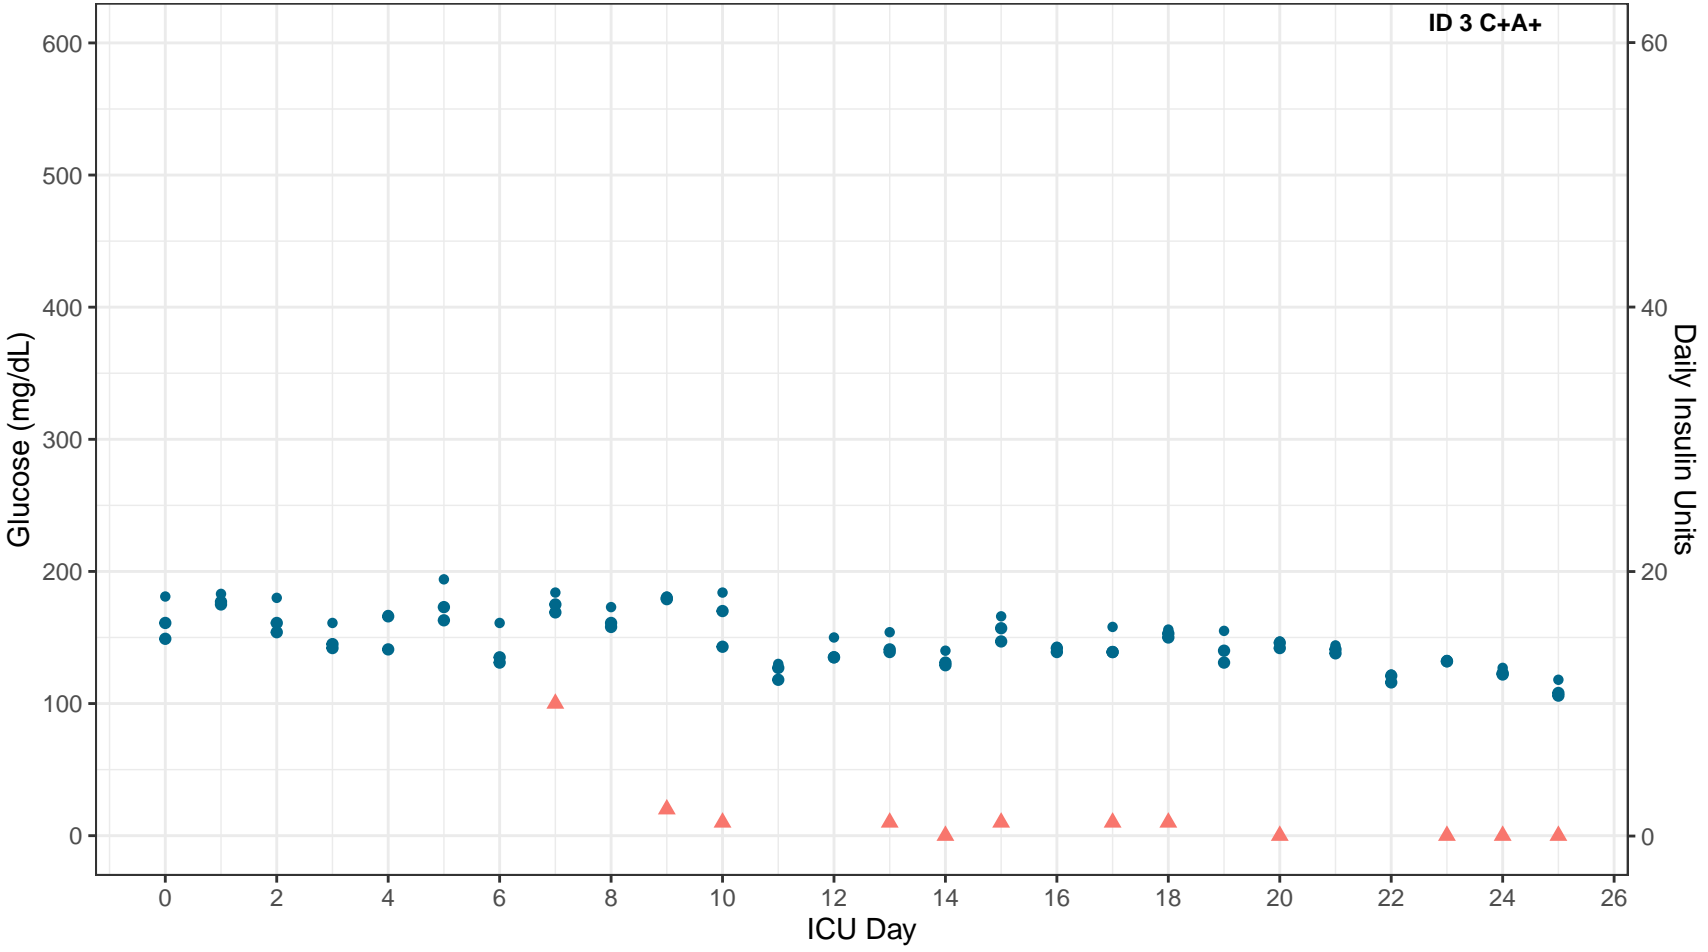

▲ Insulin      ● Glucose

ID 4 C+A+

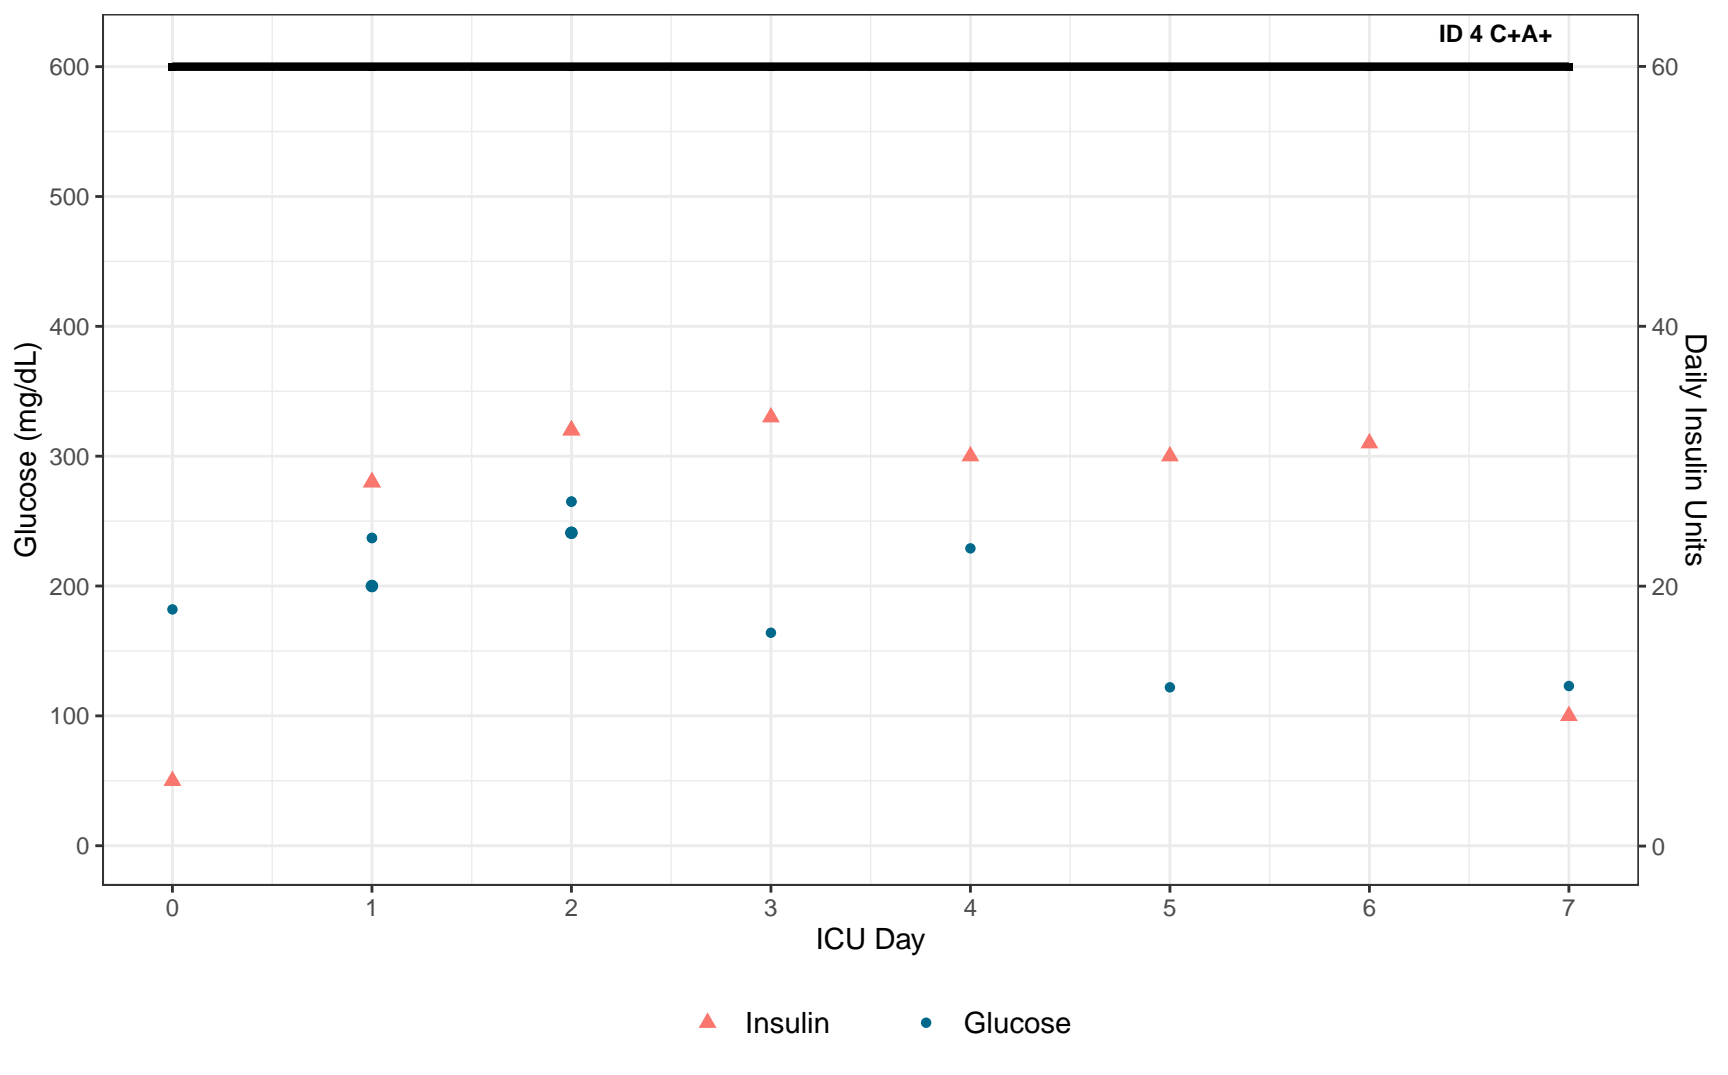

ID 5 C+A+

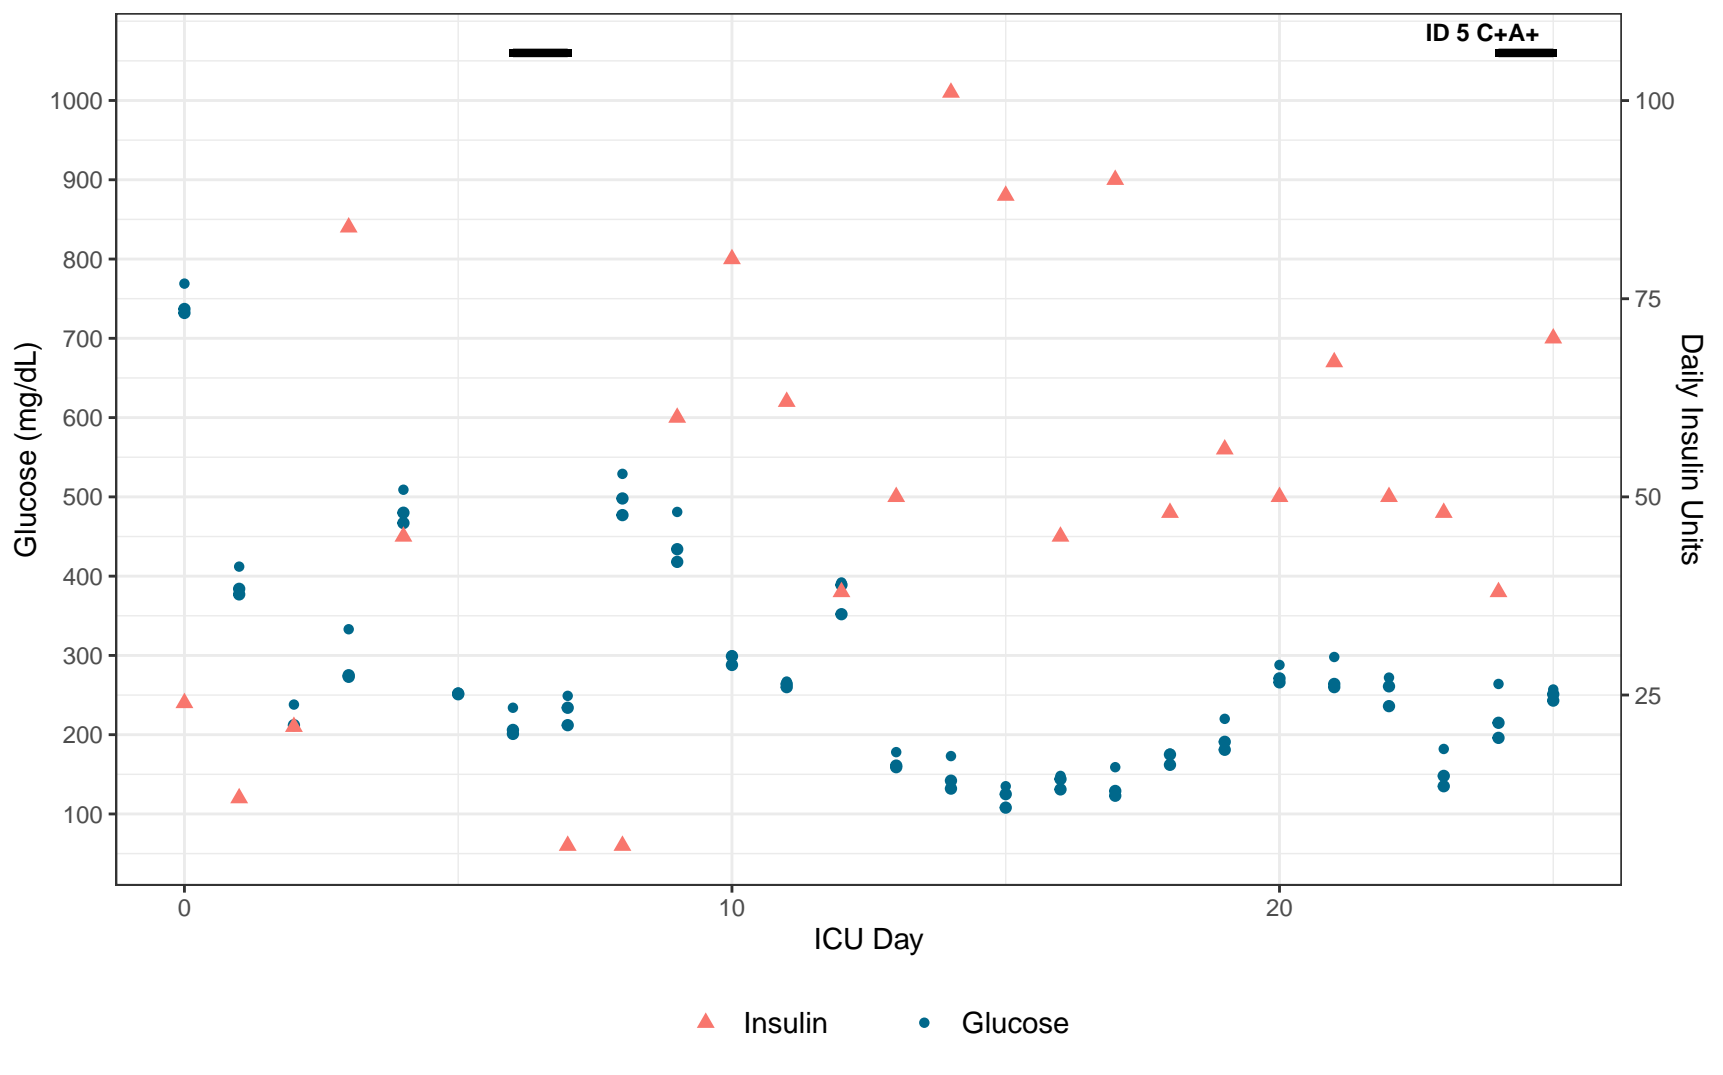

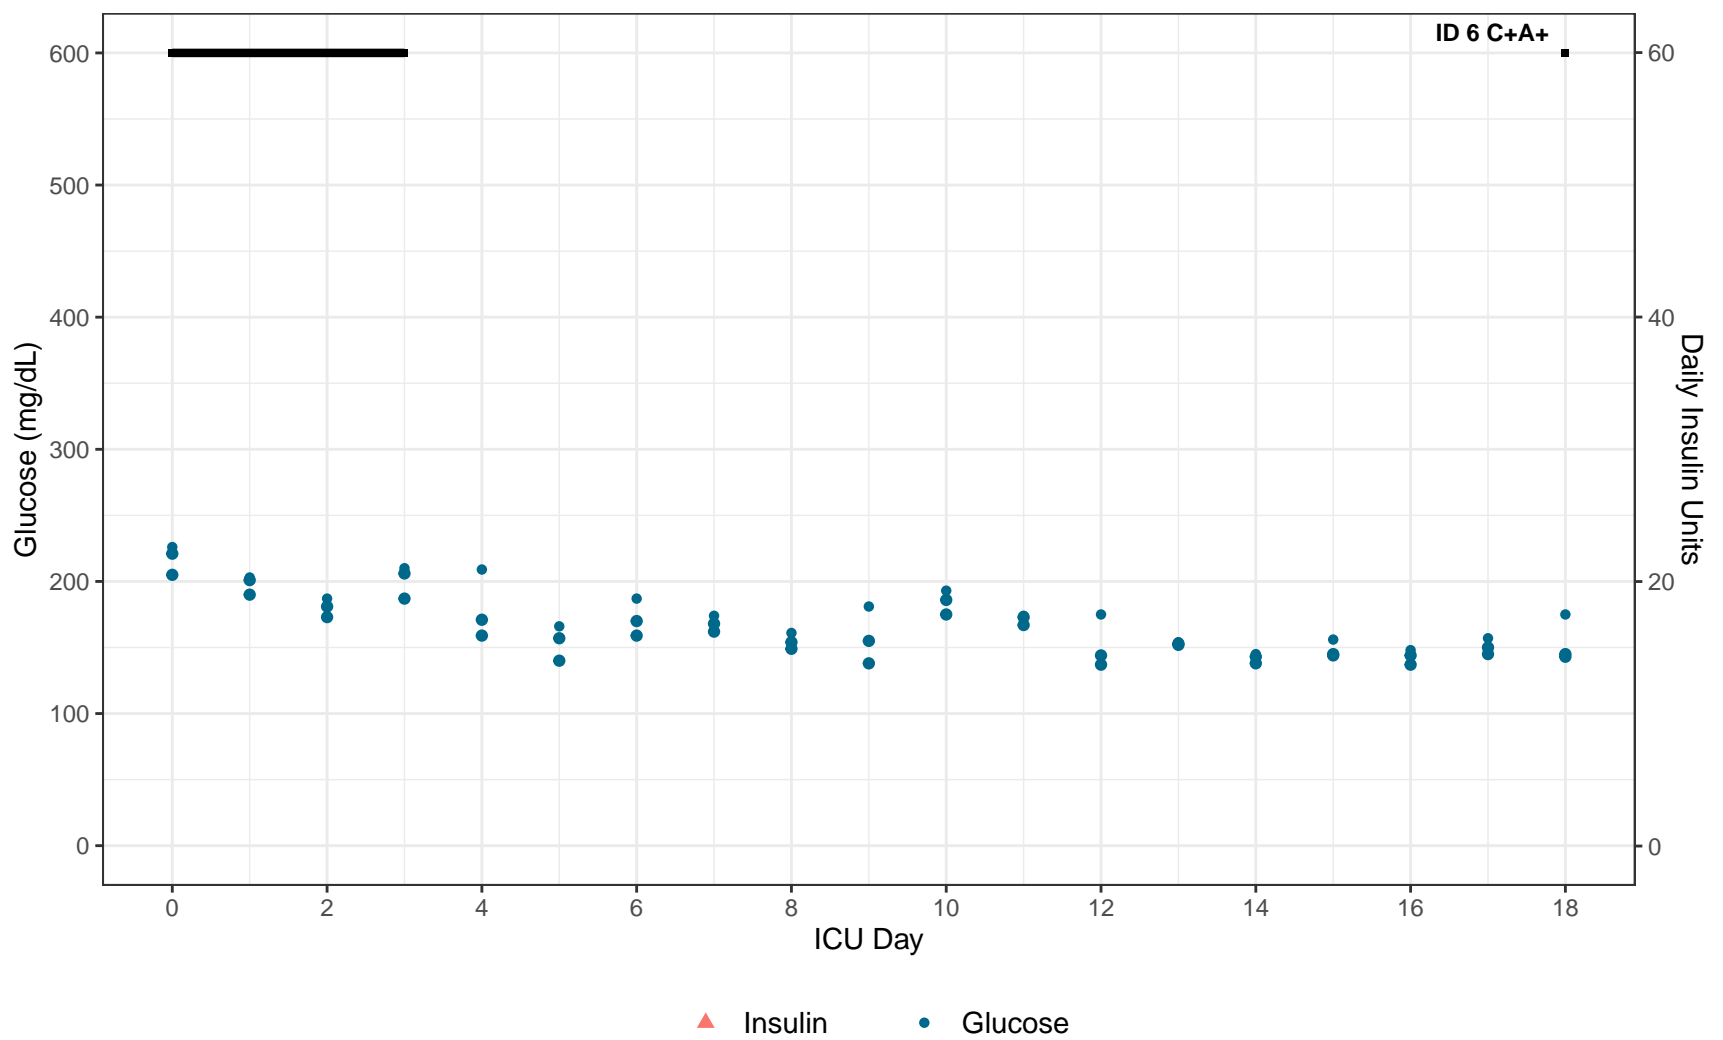

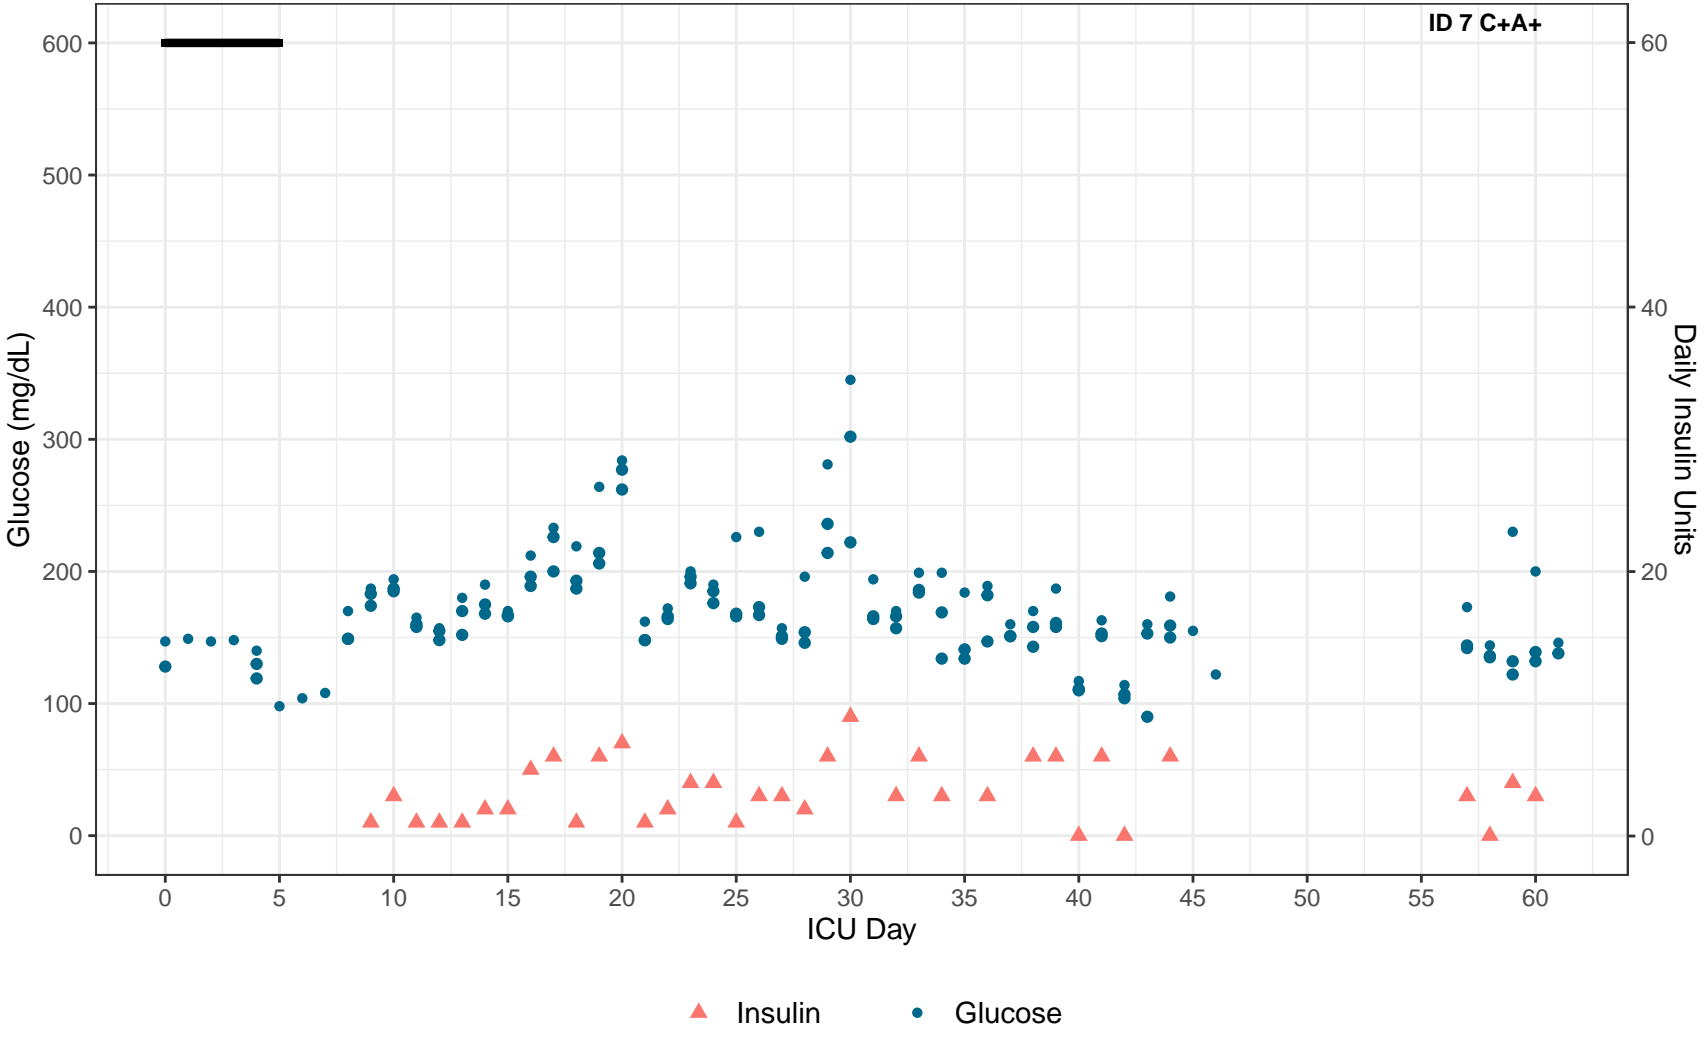

ID 8 C+A+

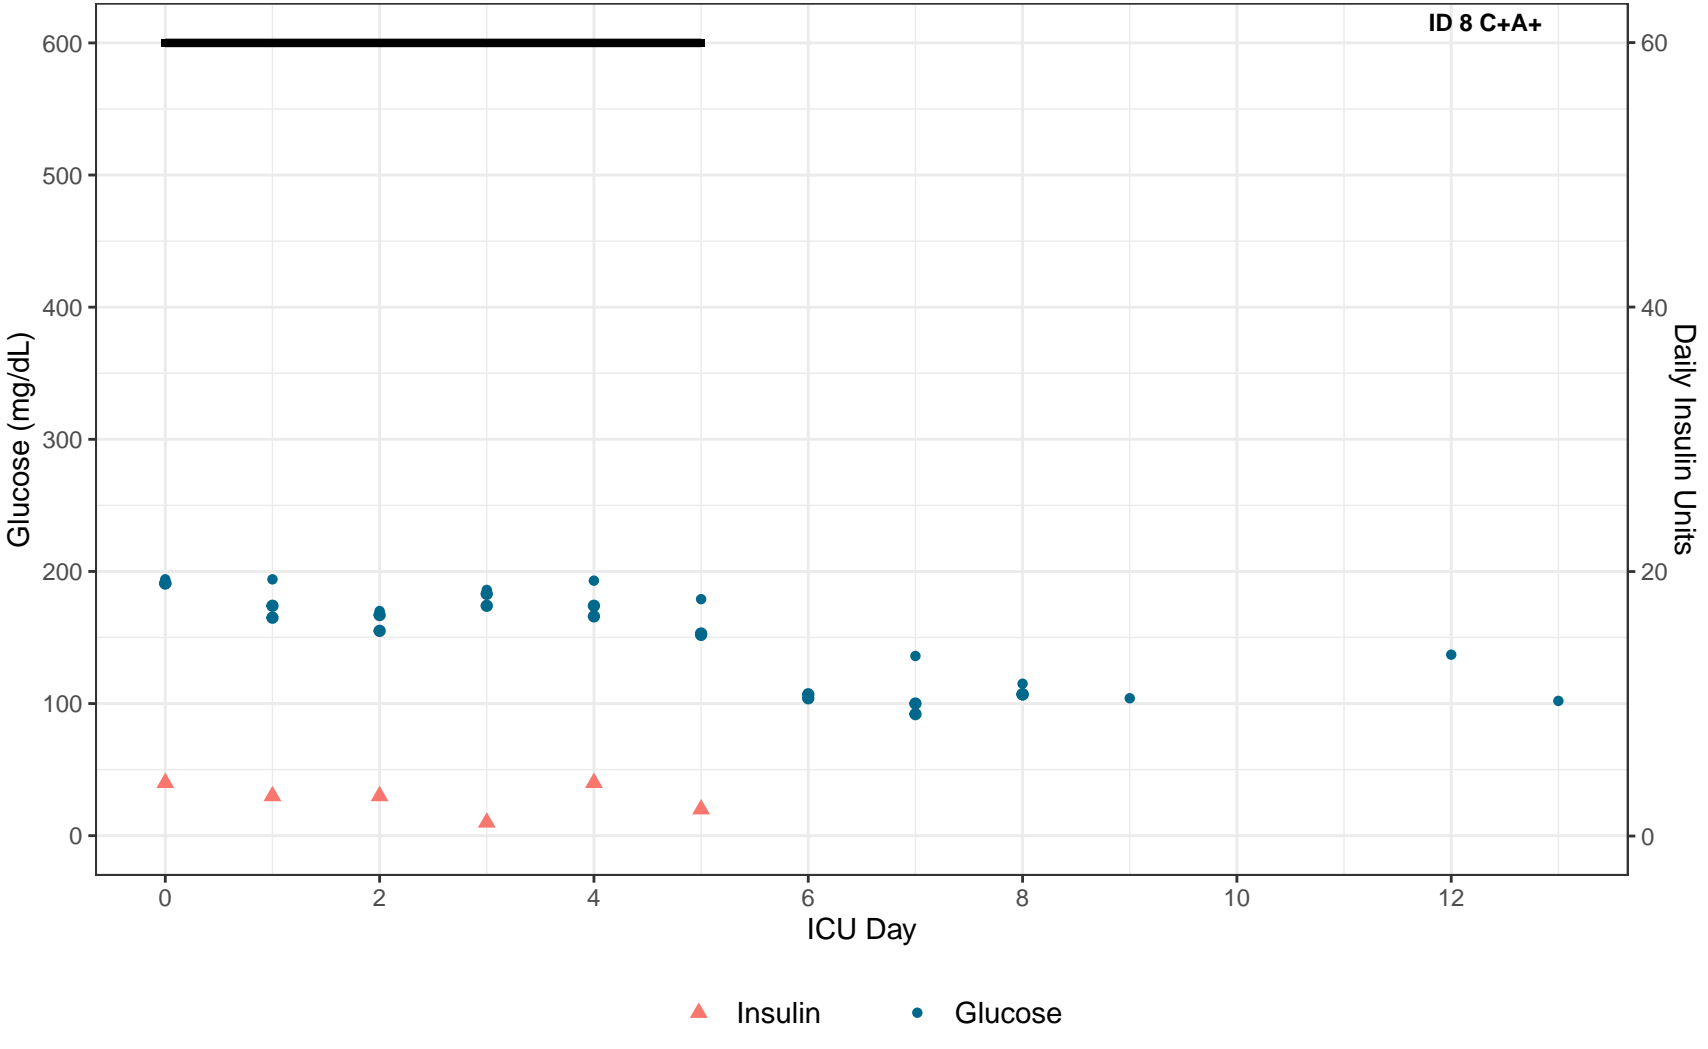

▲ Insulin      ● Glucose

ID 9 C+A+

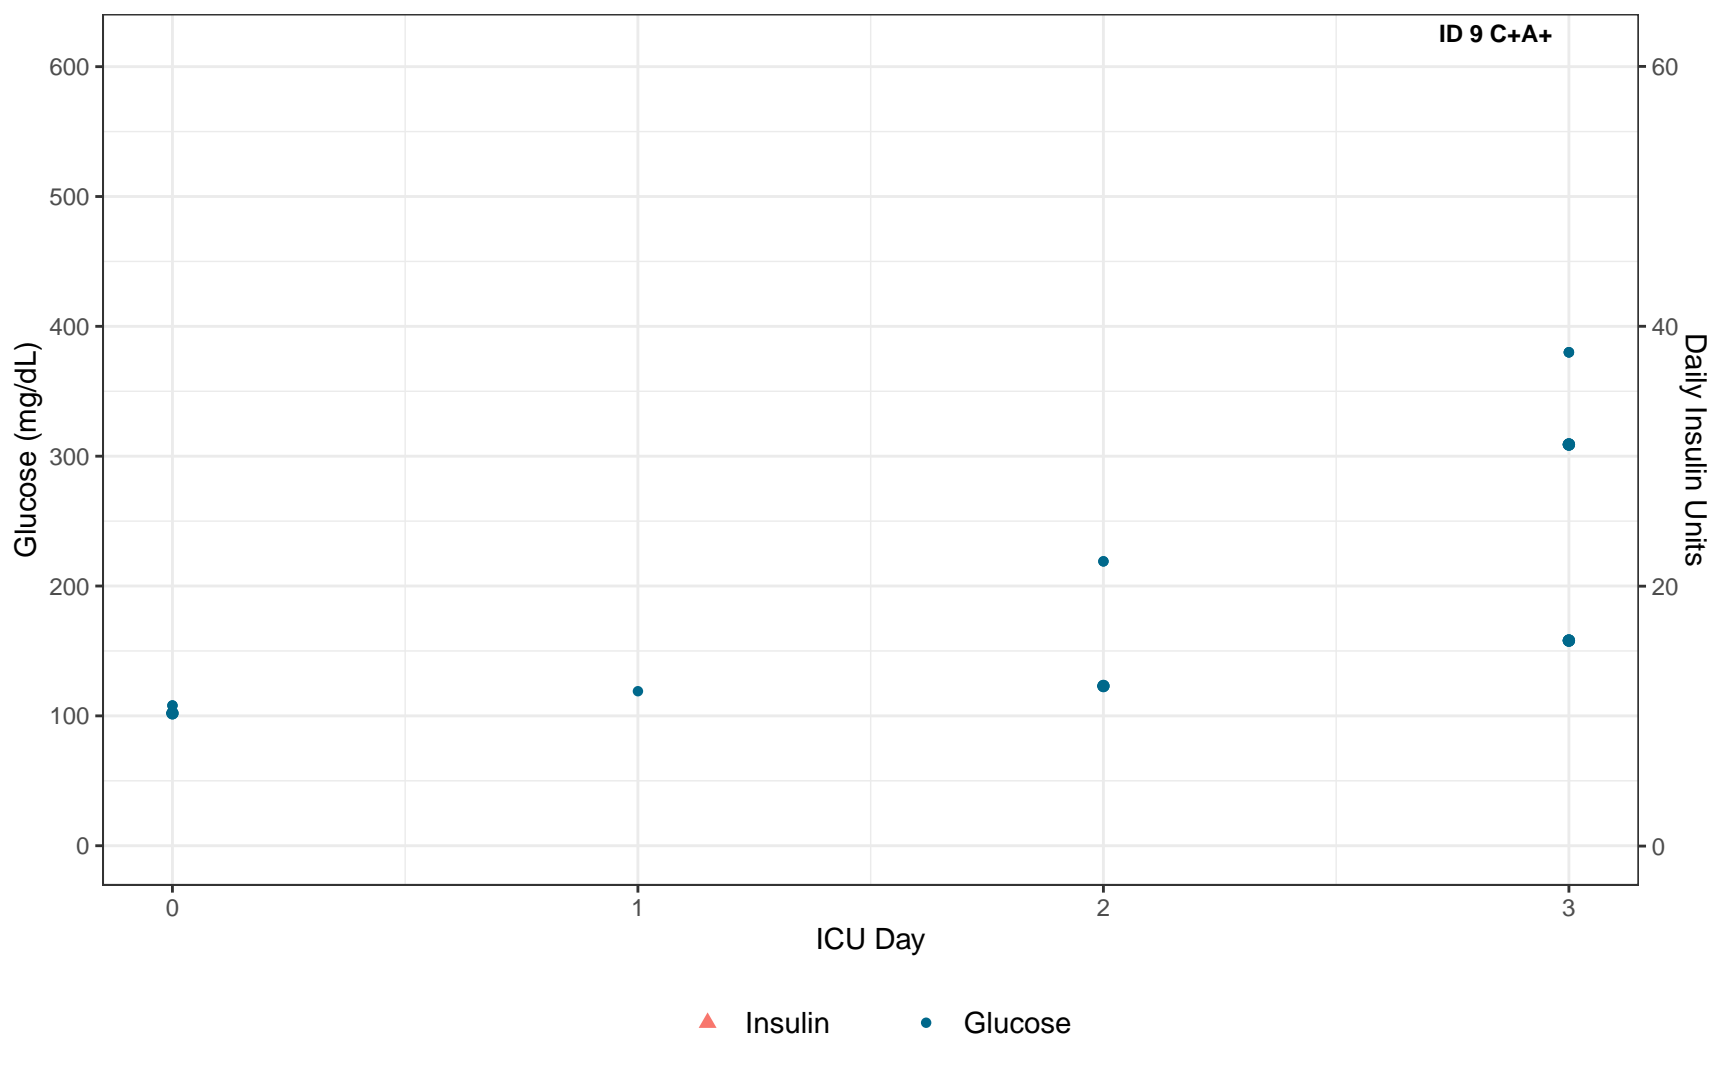



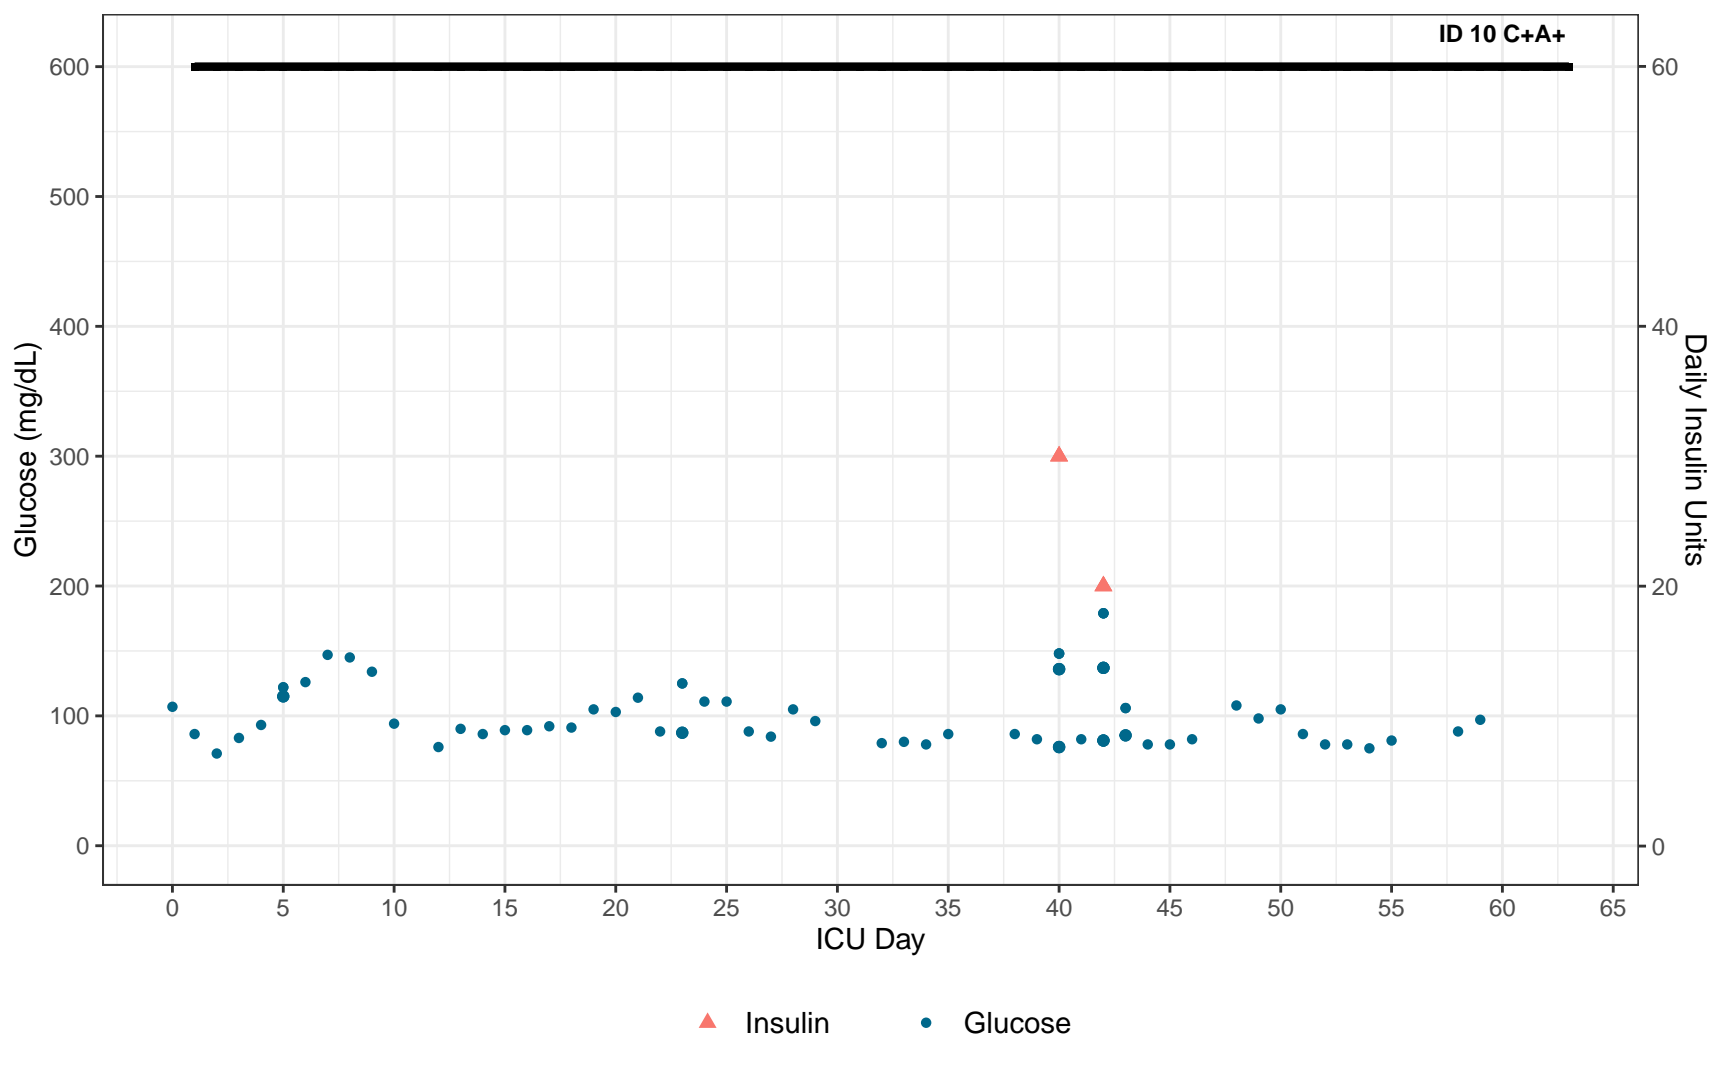

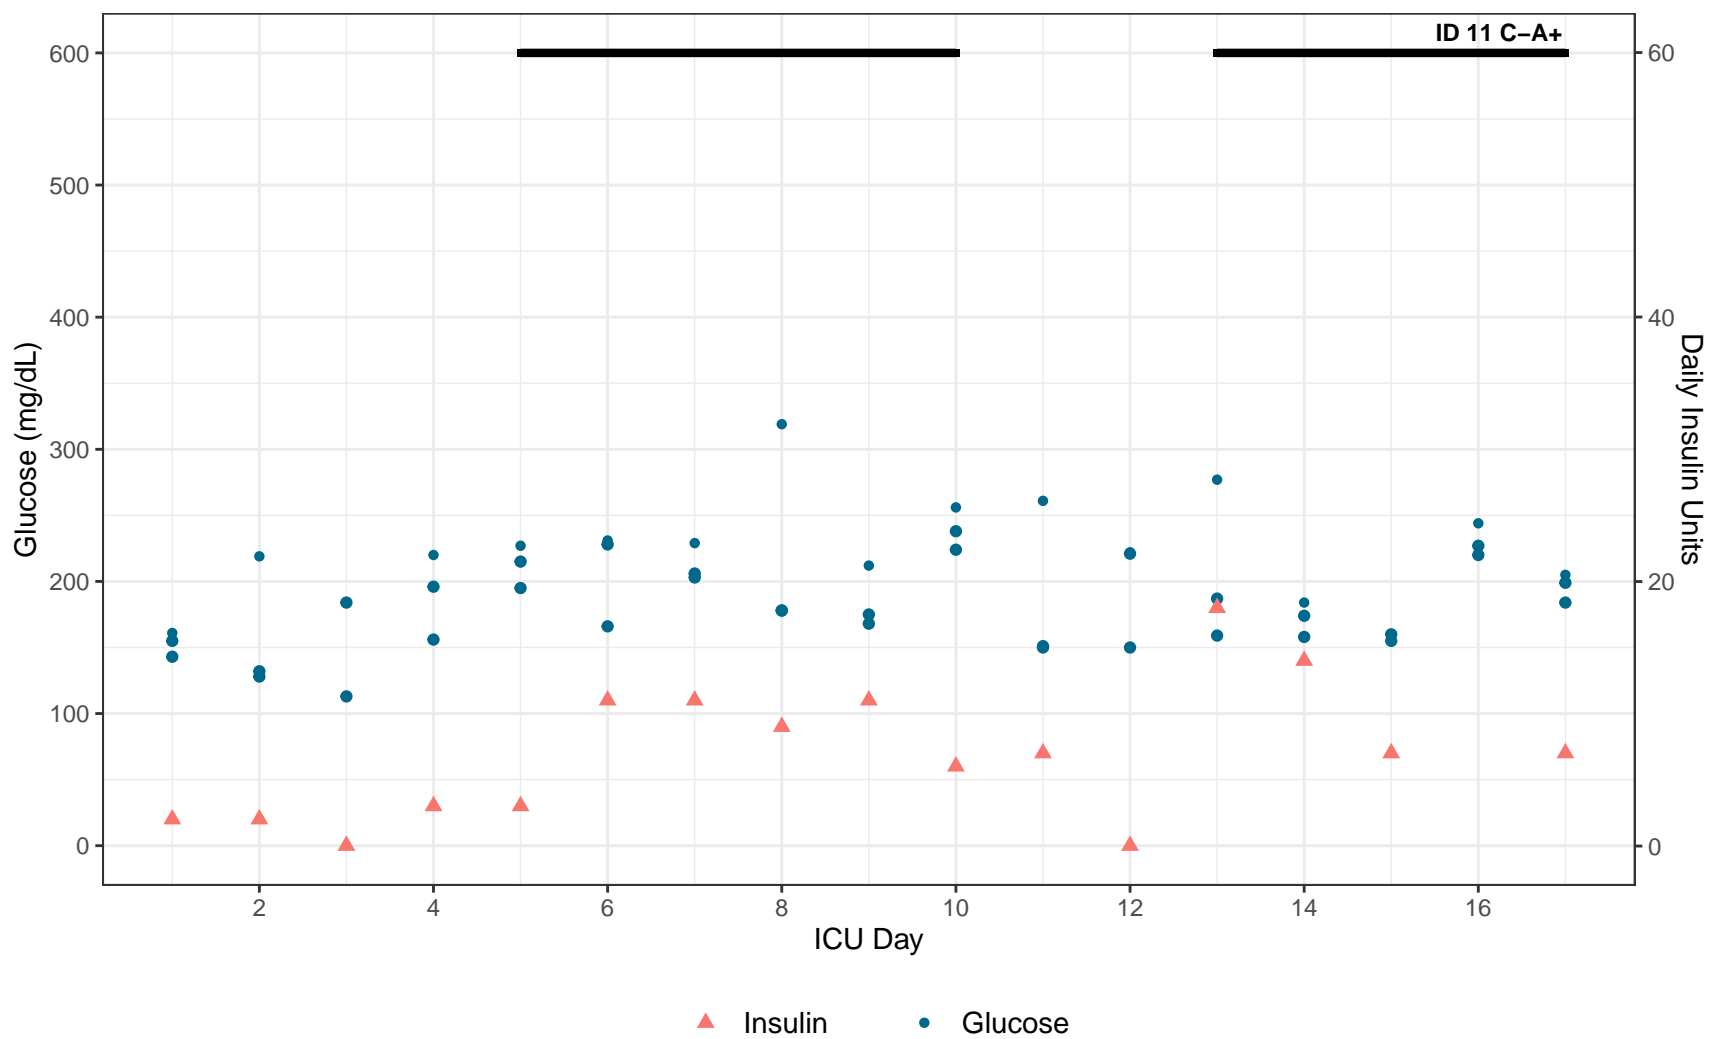

ID 12 C+A+

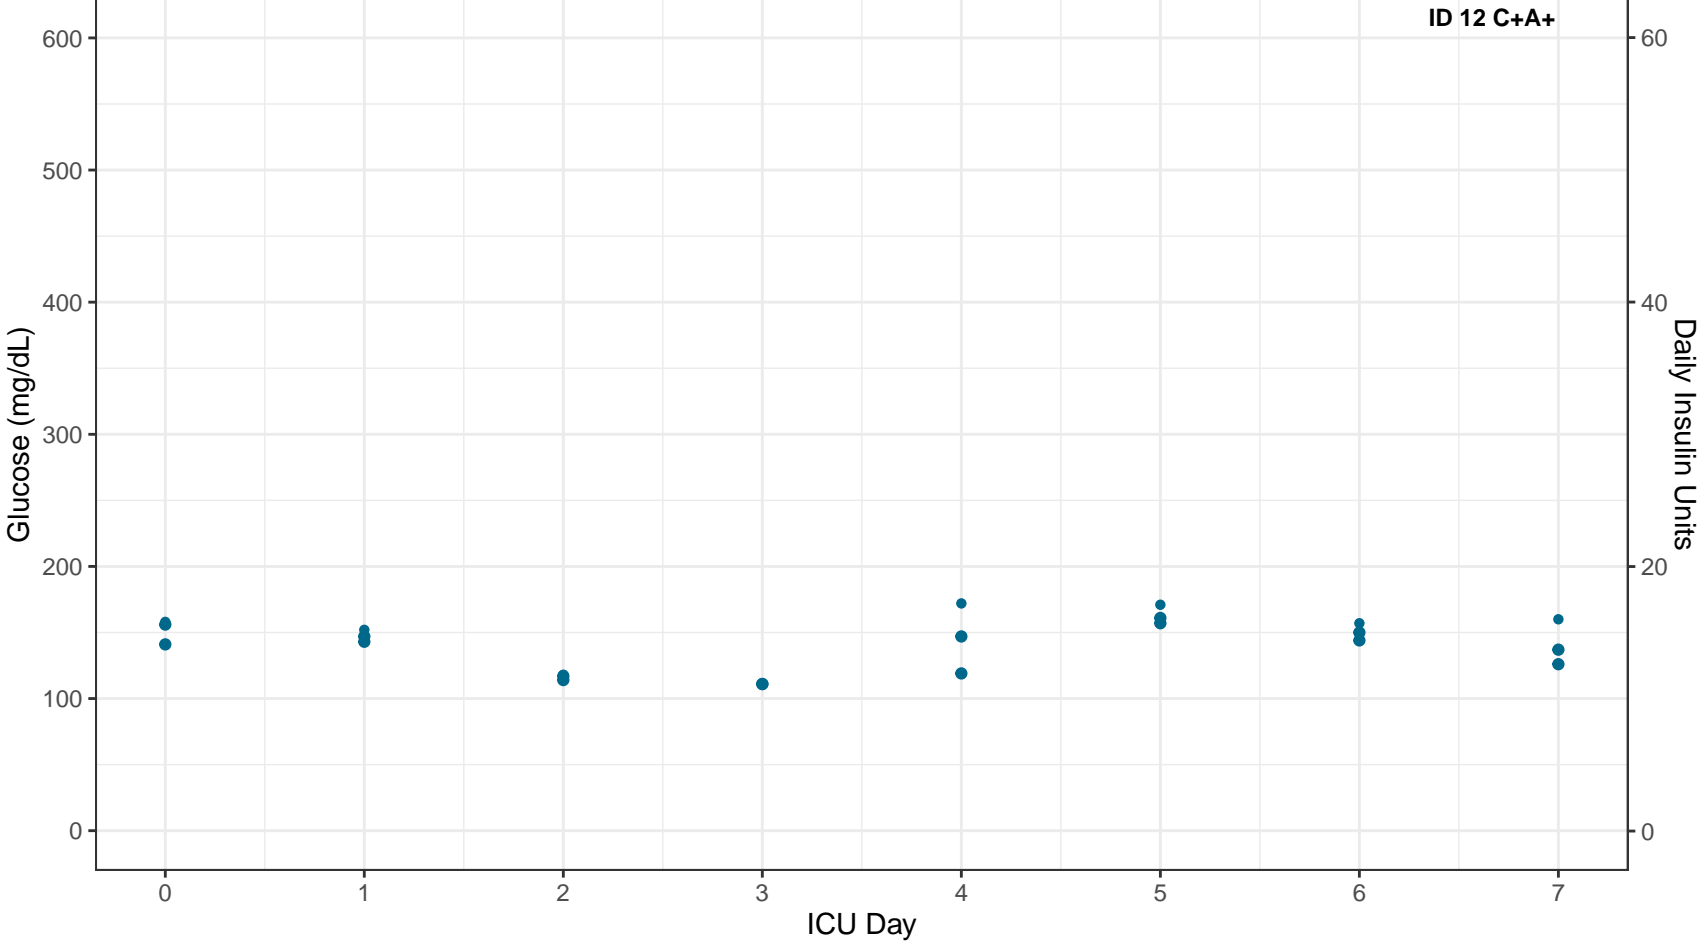

▲ Insulin      ● Glucose

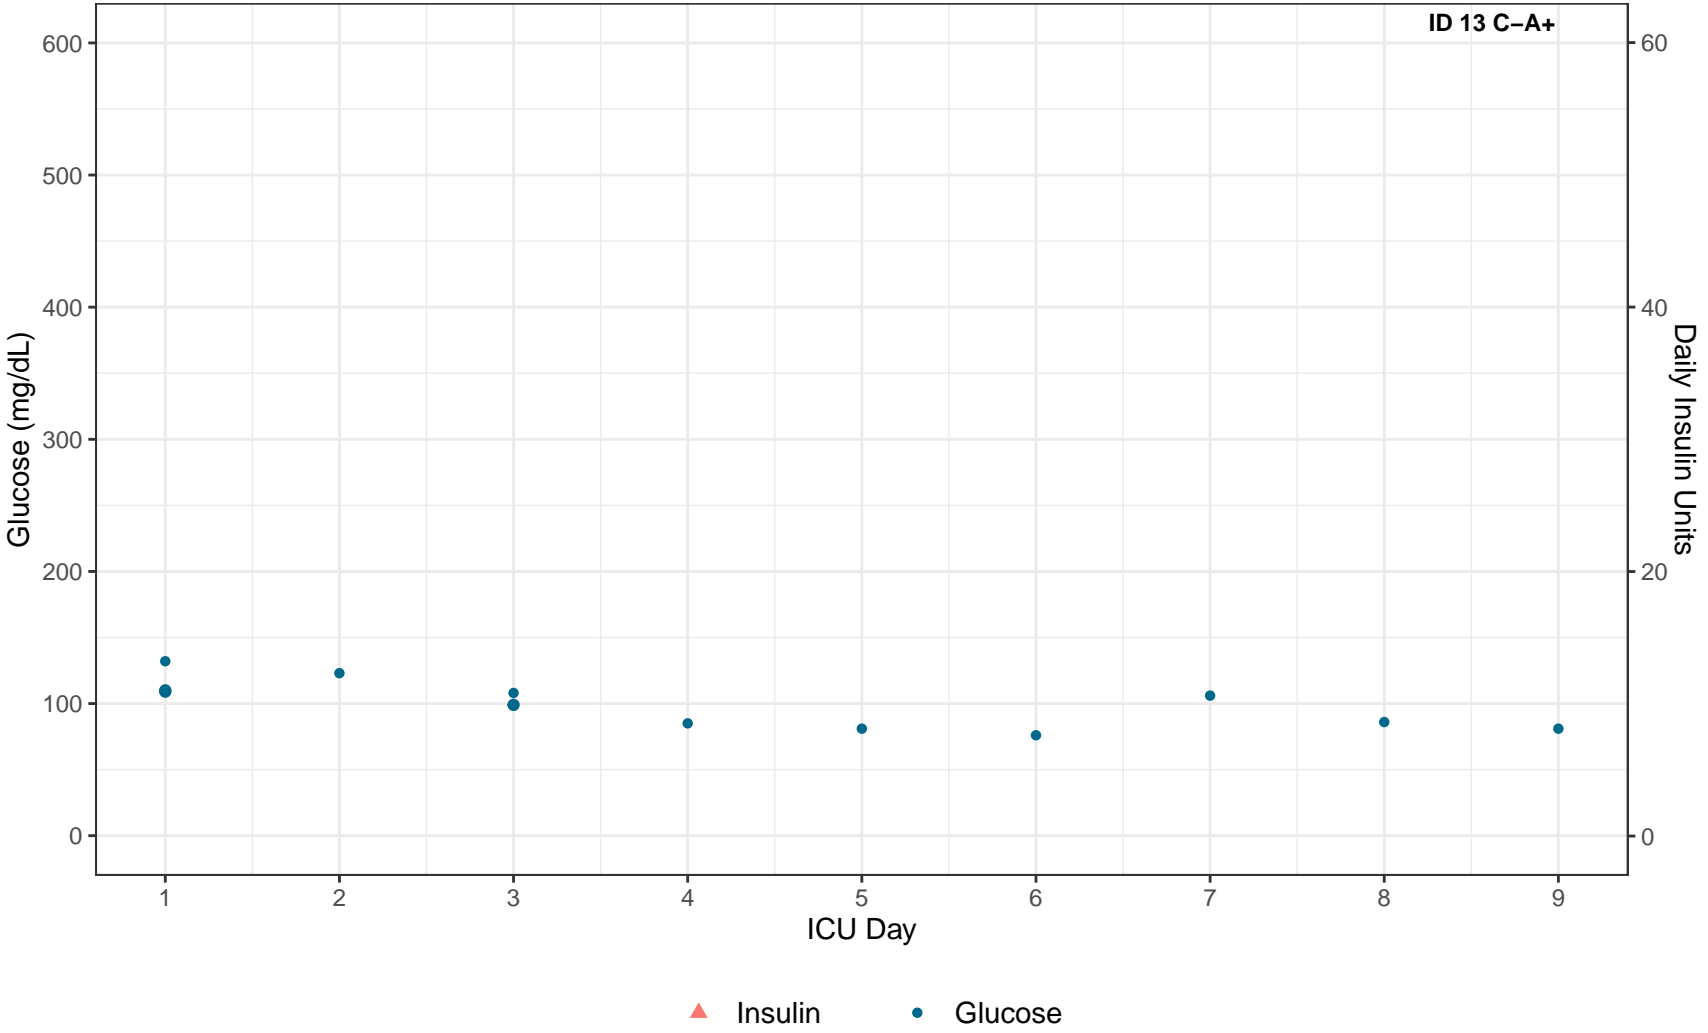

ID 14 C+A+

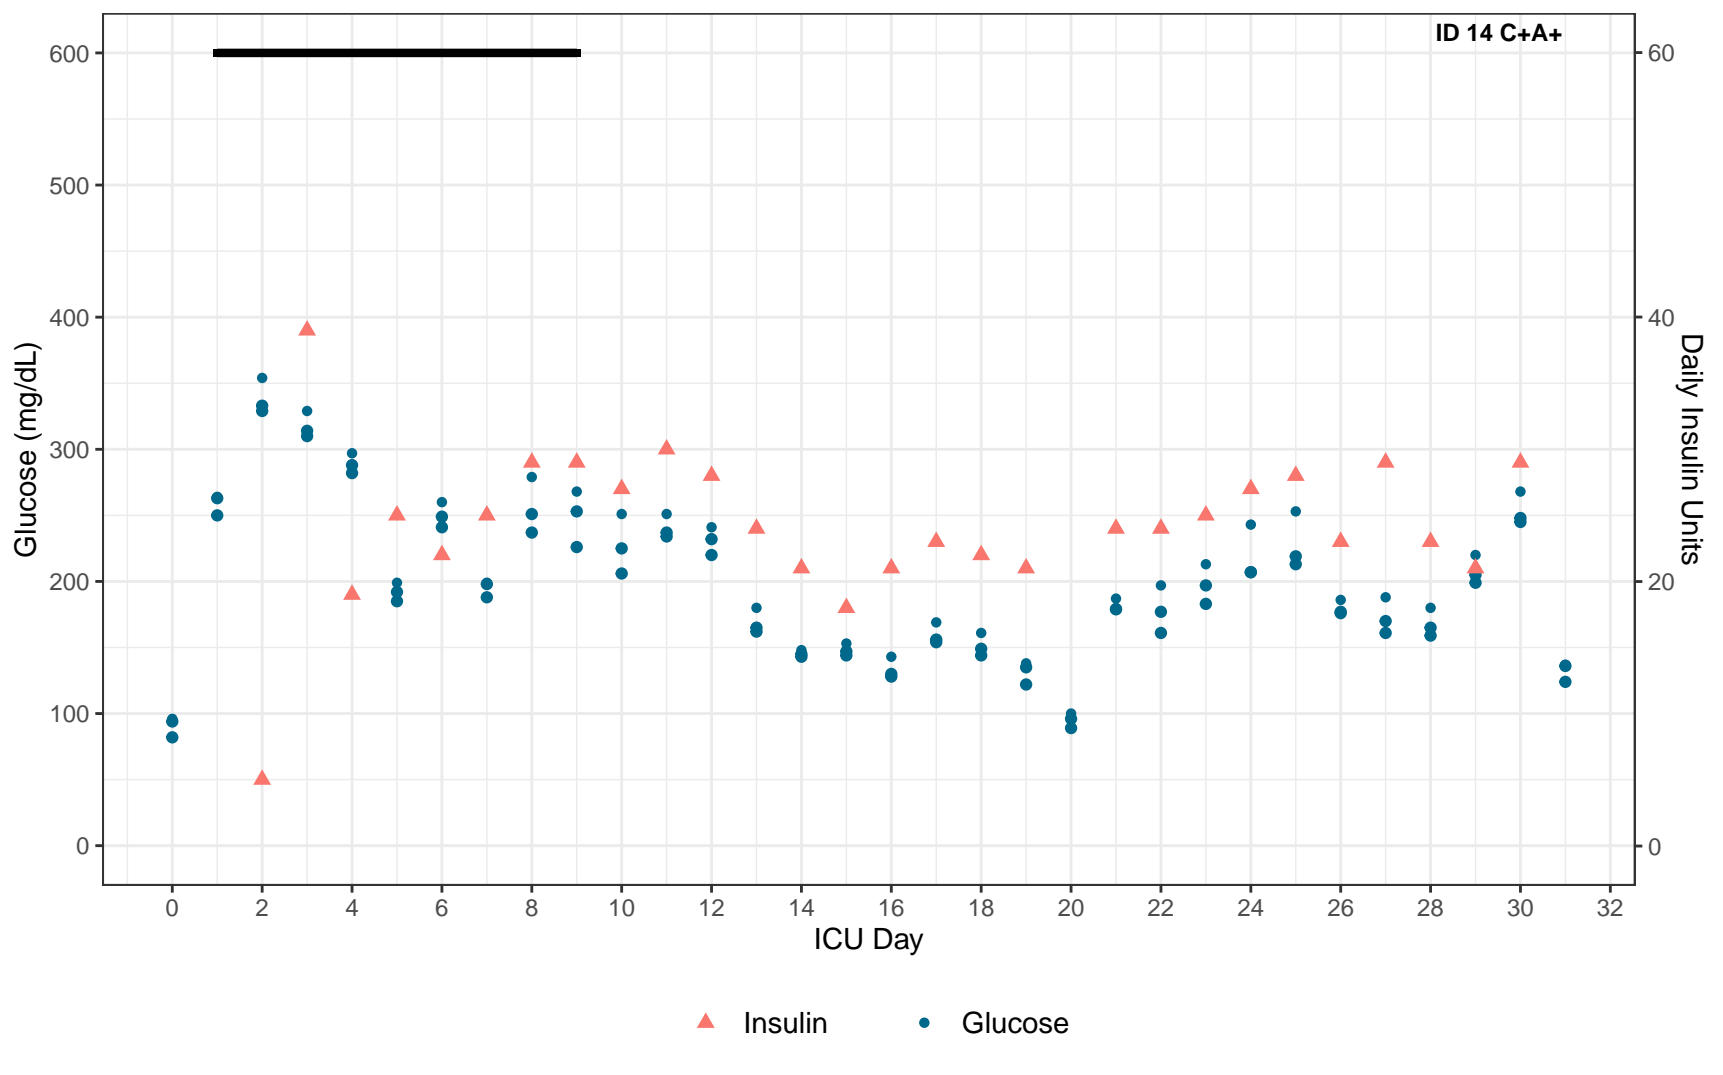

ID 15 C+A+

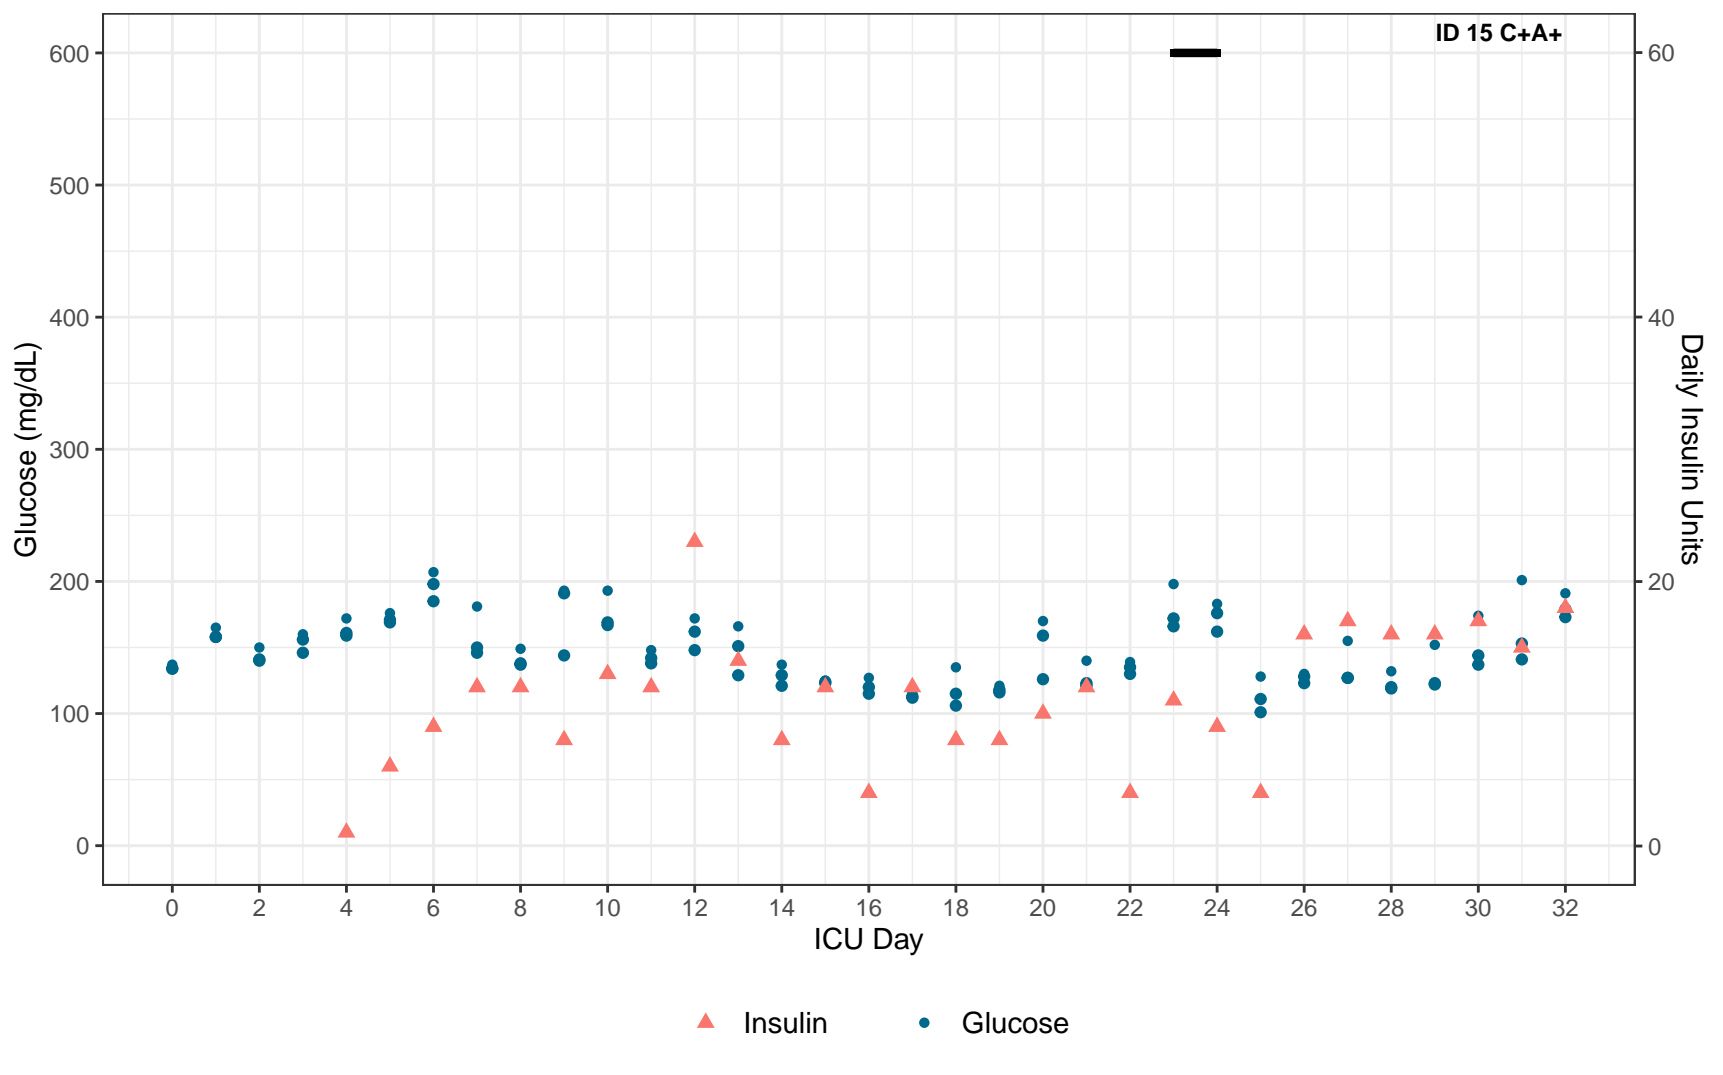

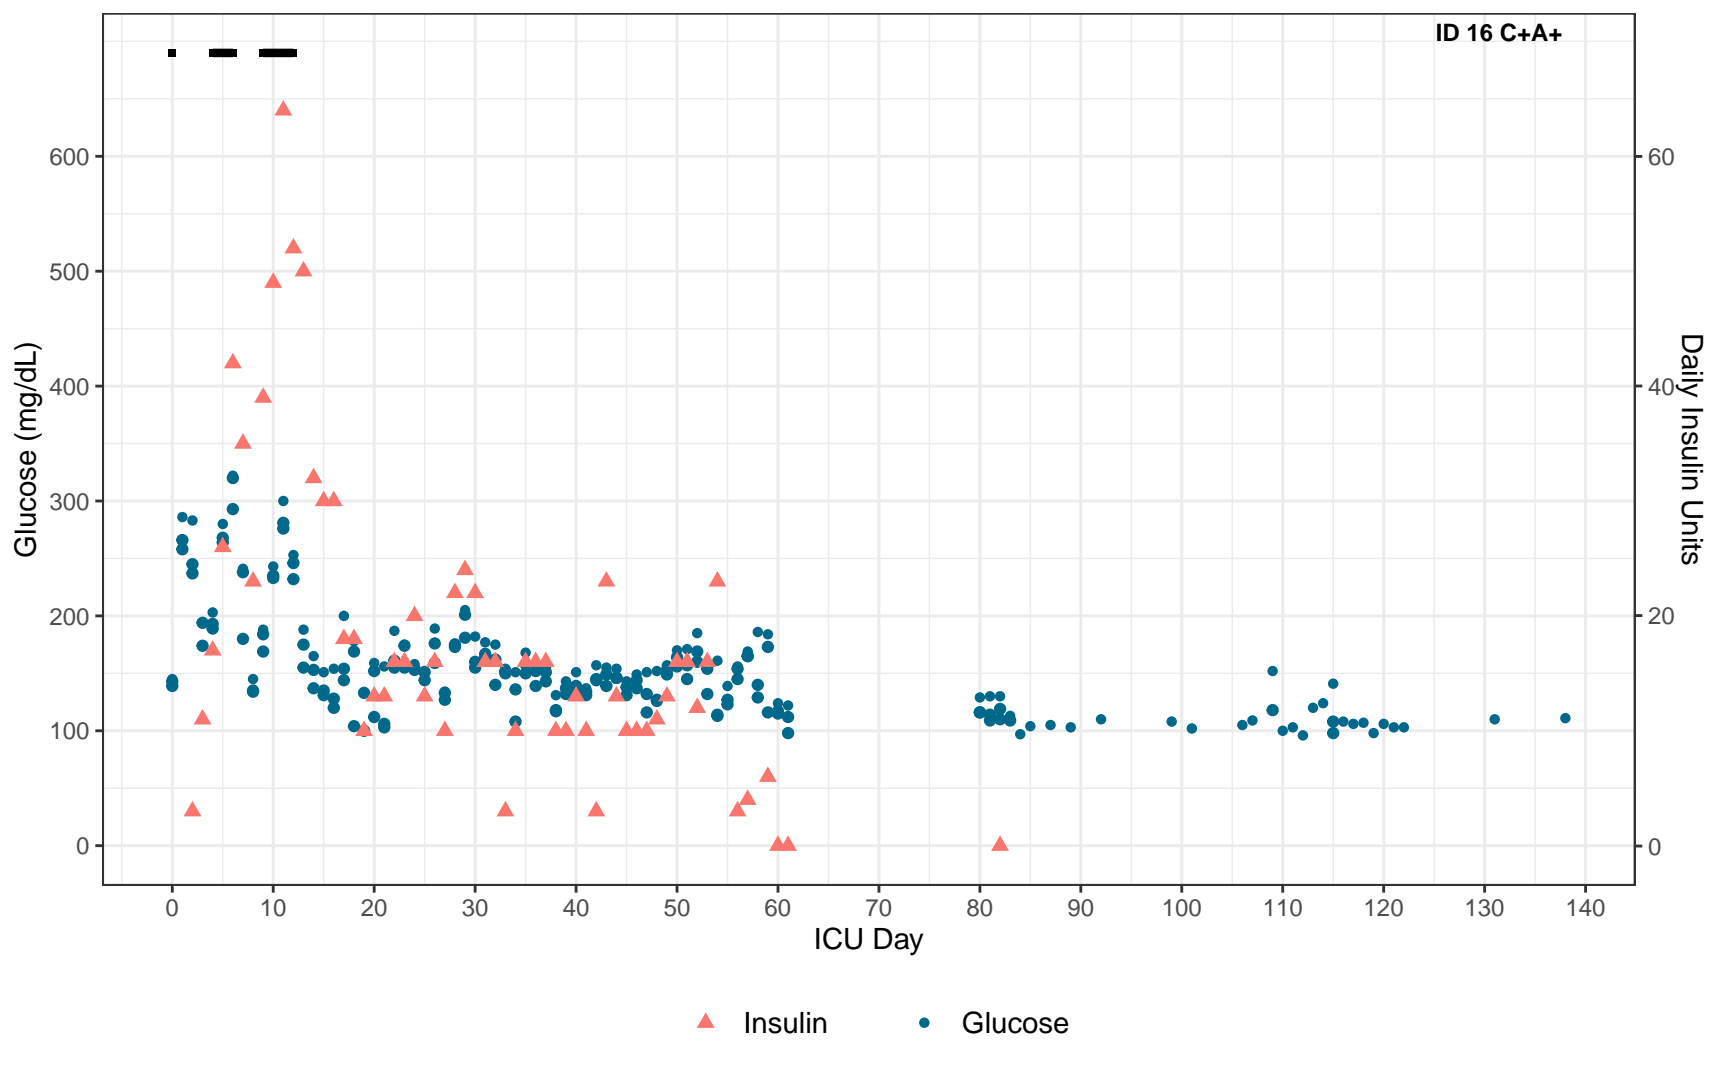

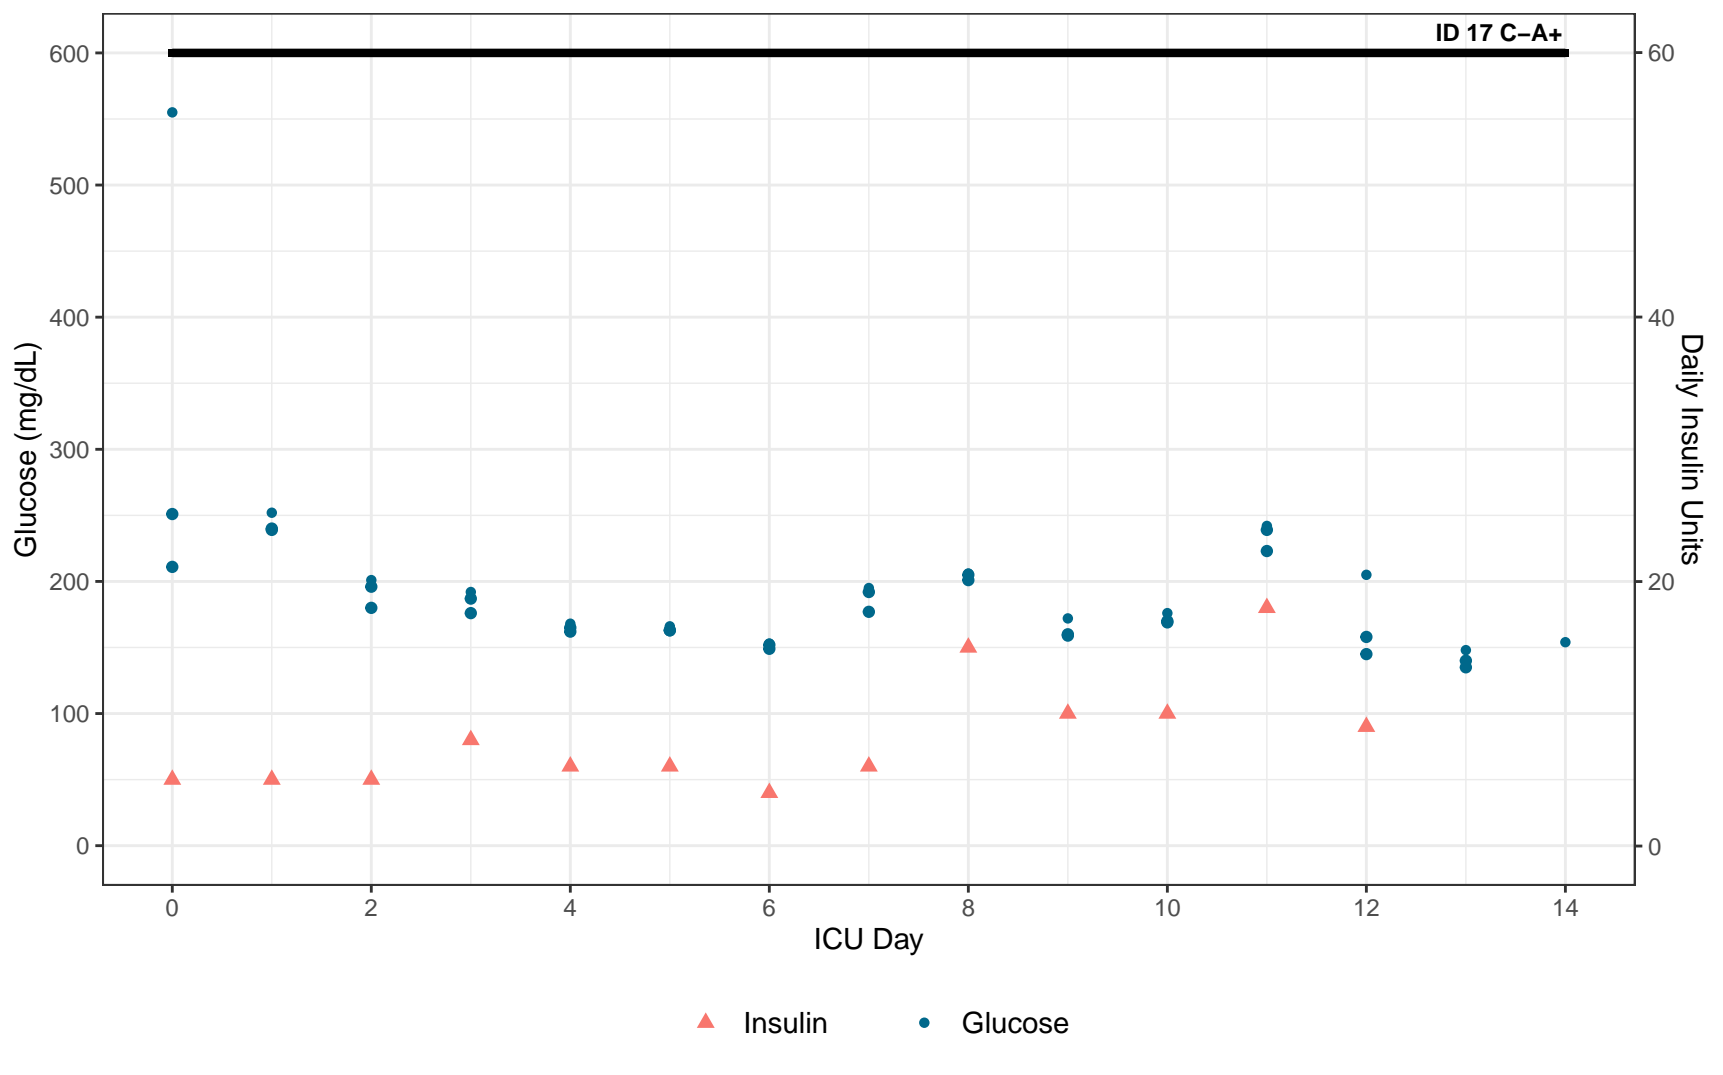



ID 18 C+A+

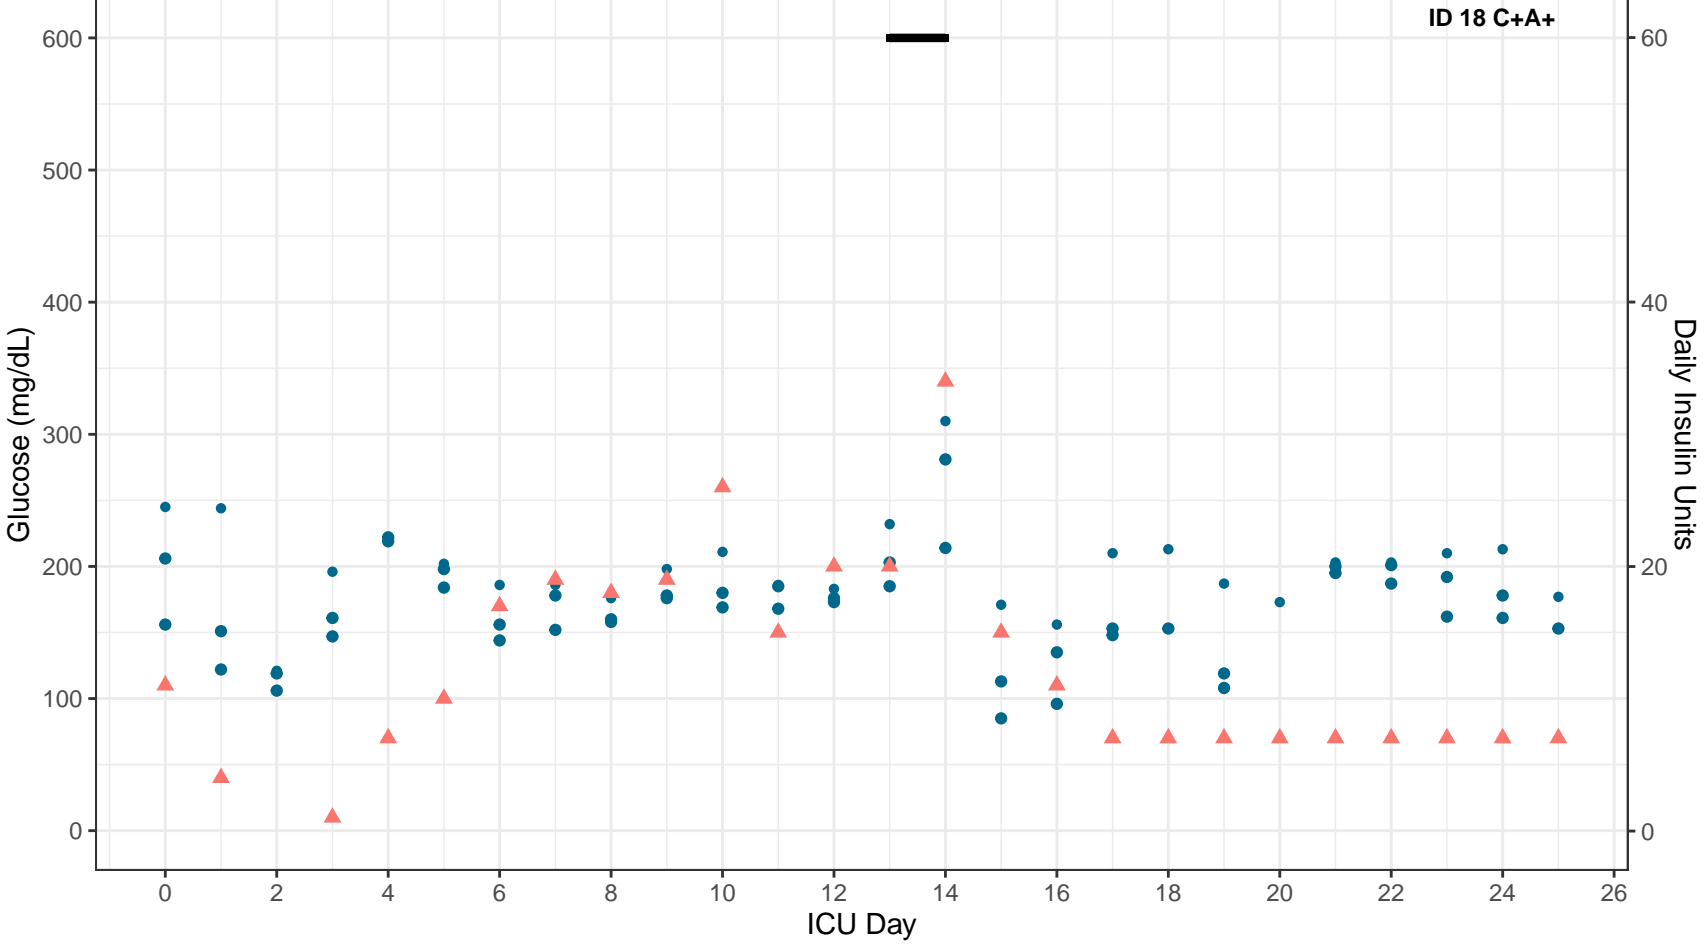

▲ Insulin      ● Glucose

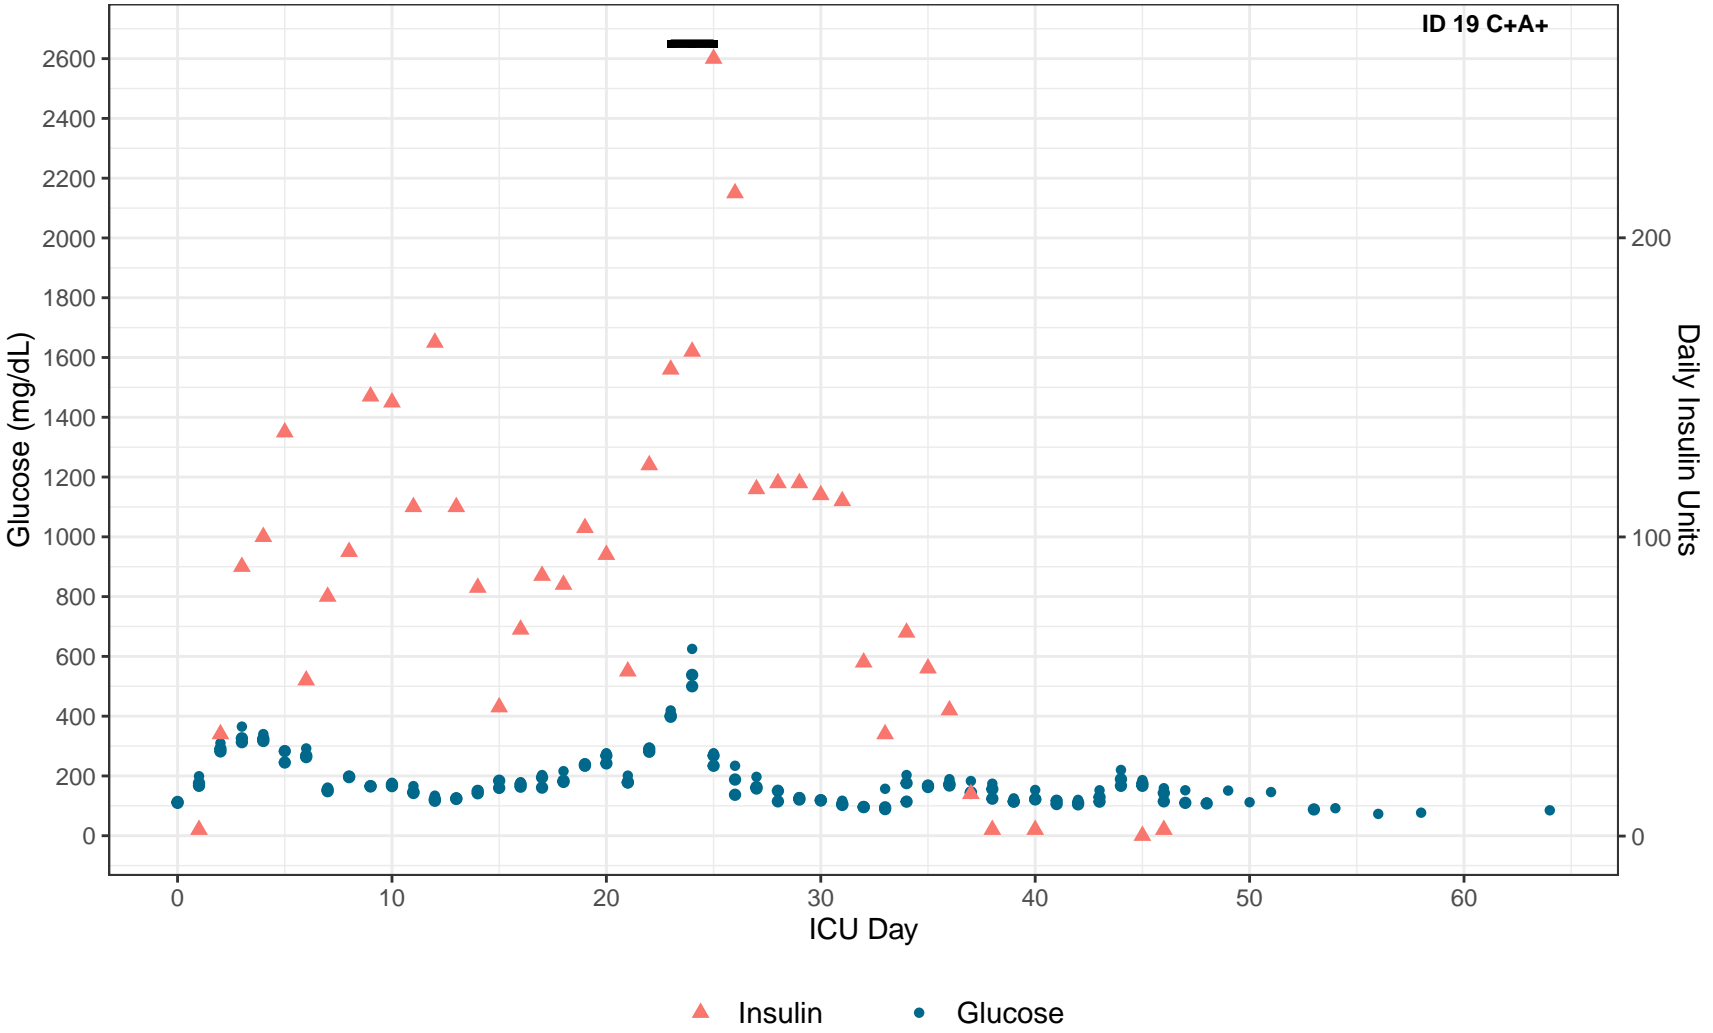

ID 20 C-A+

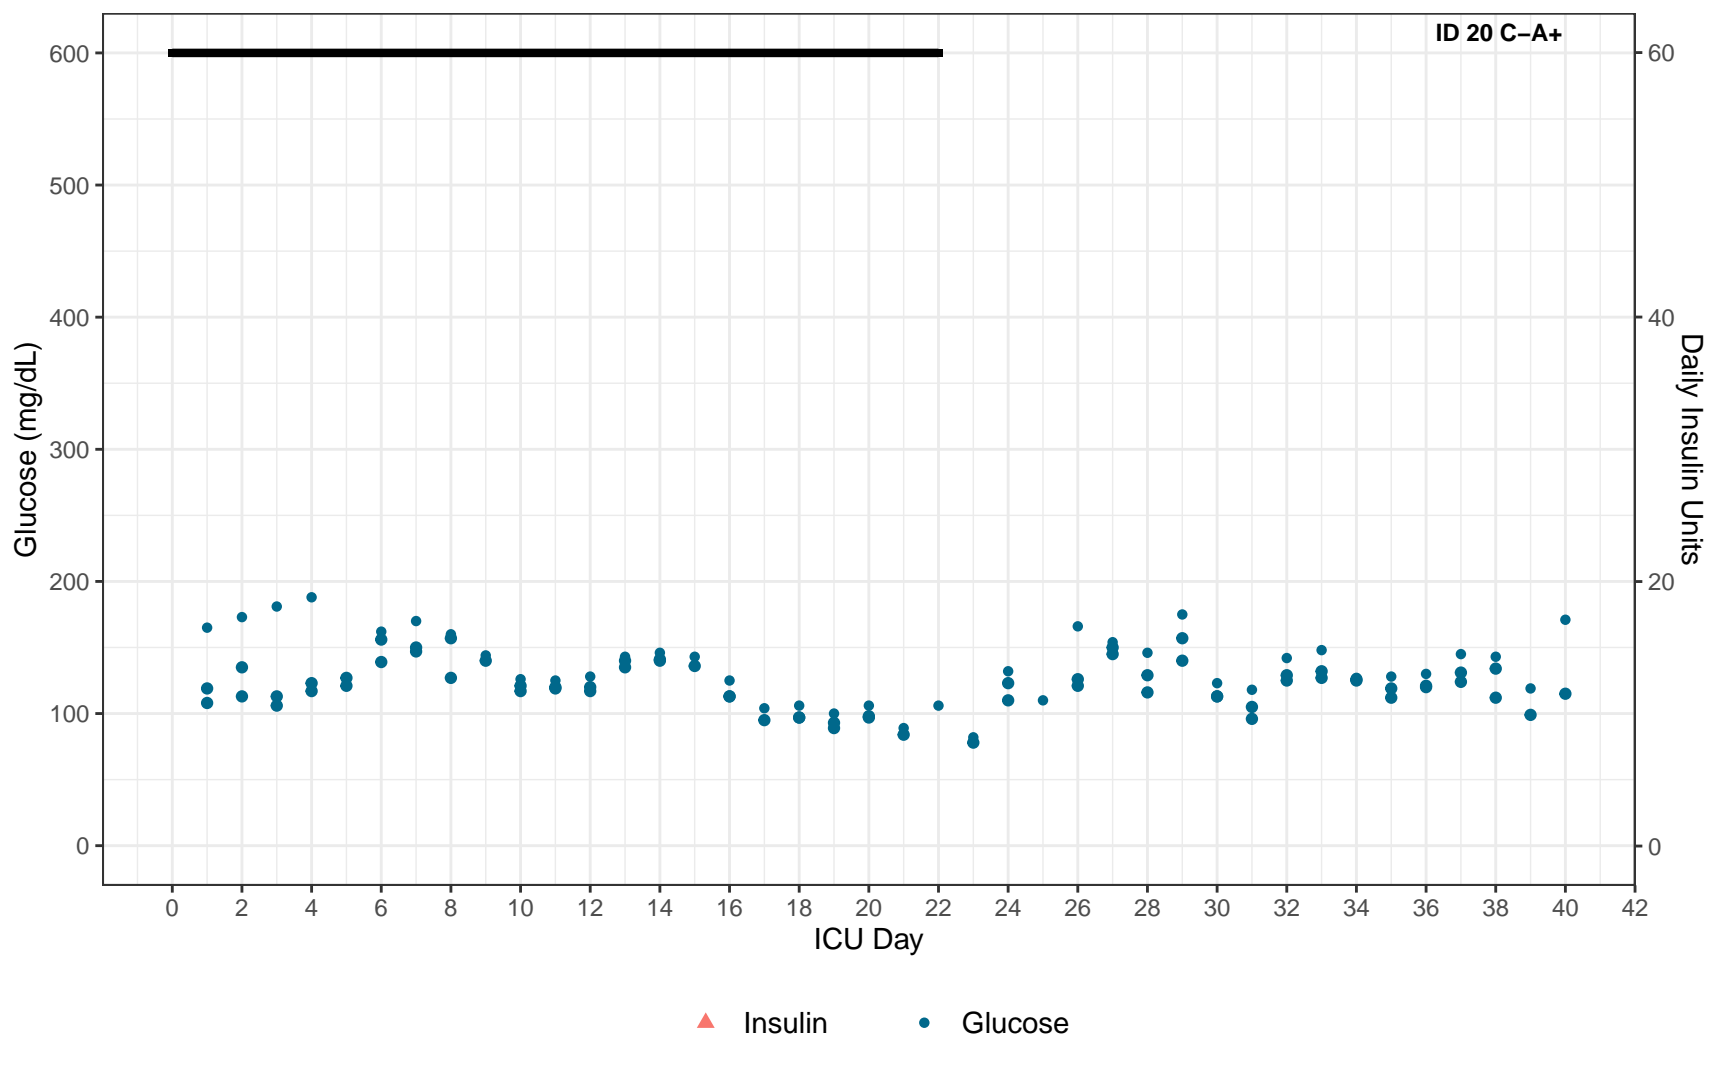

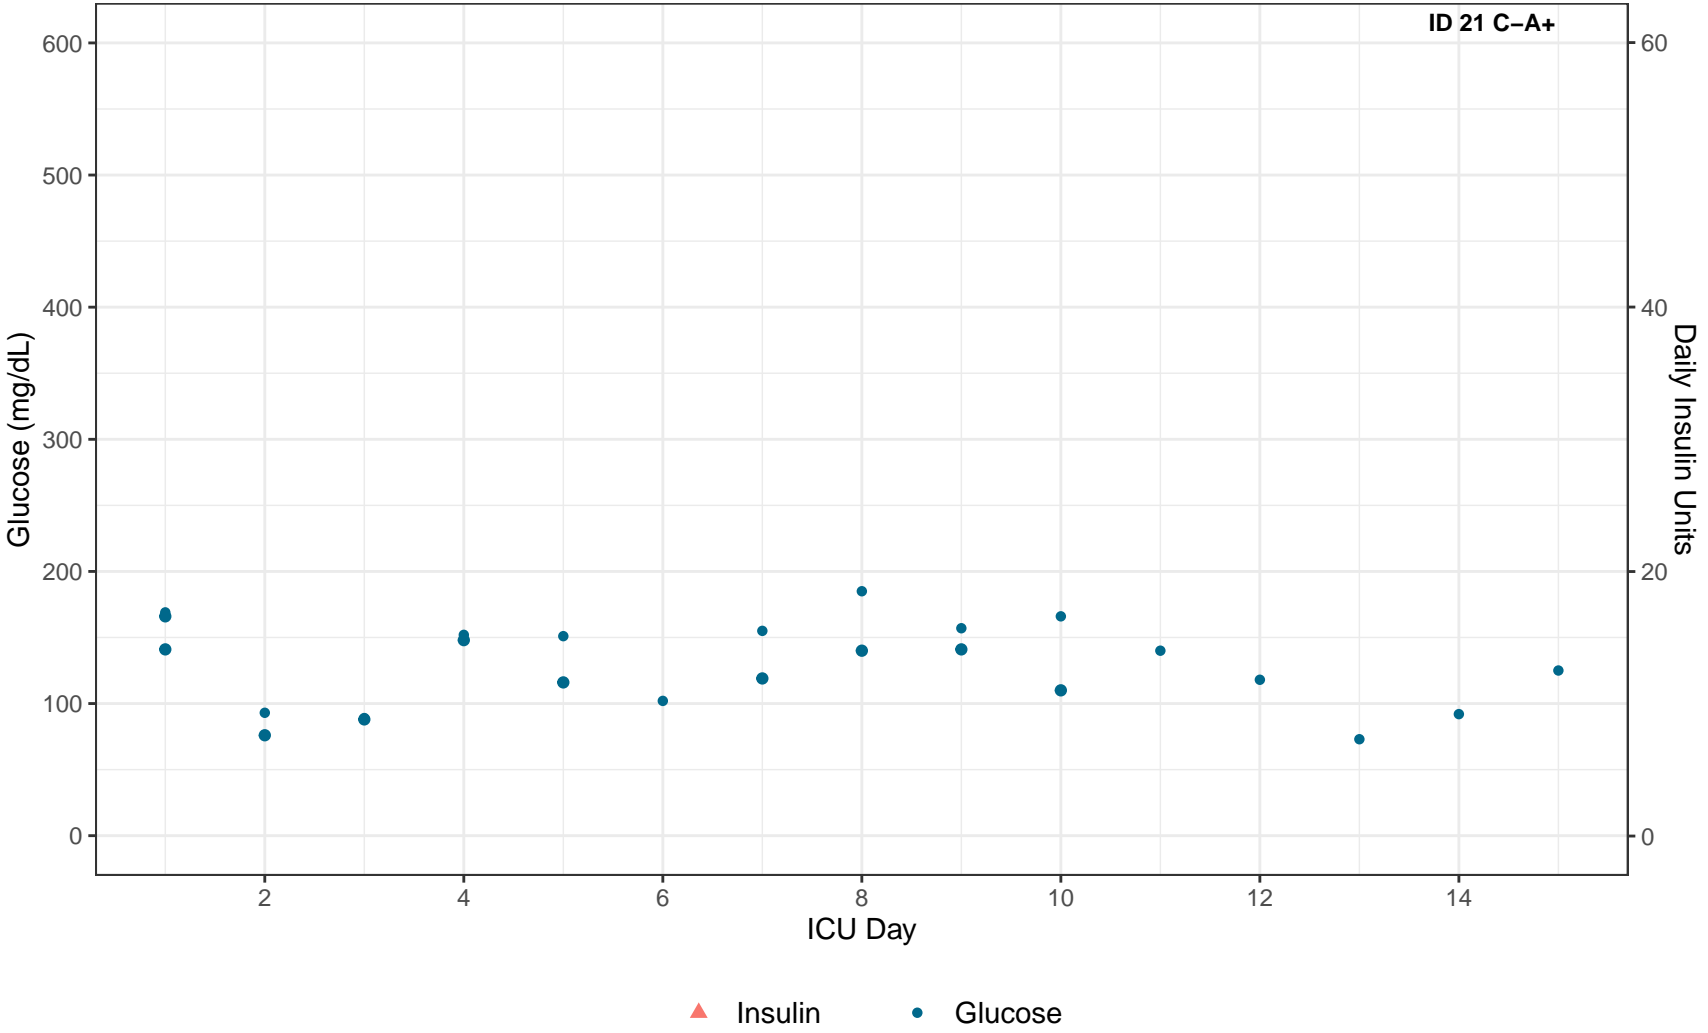

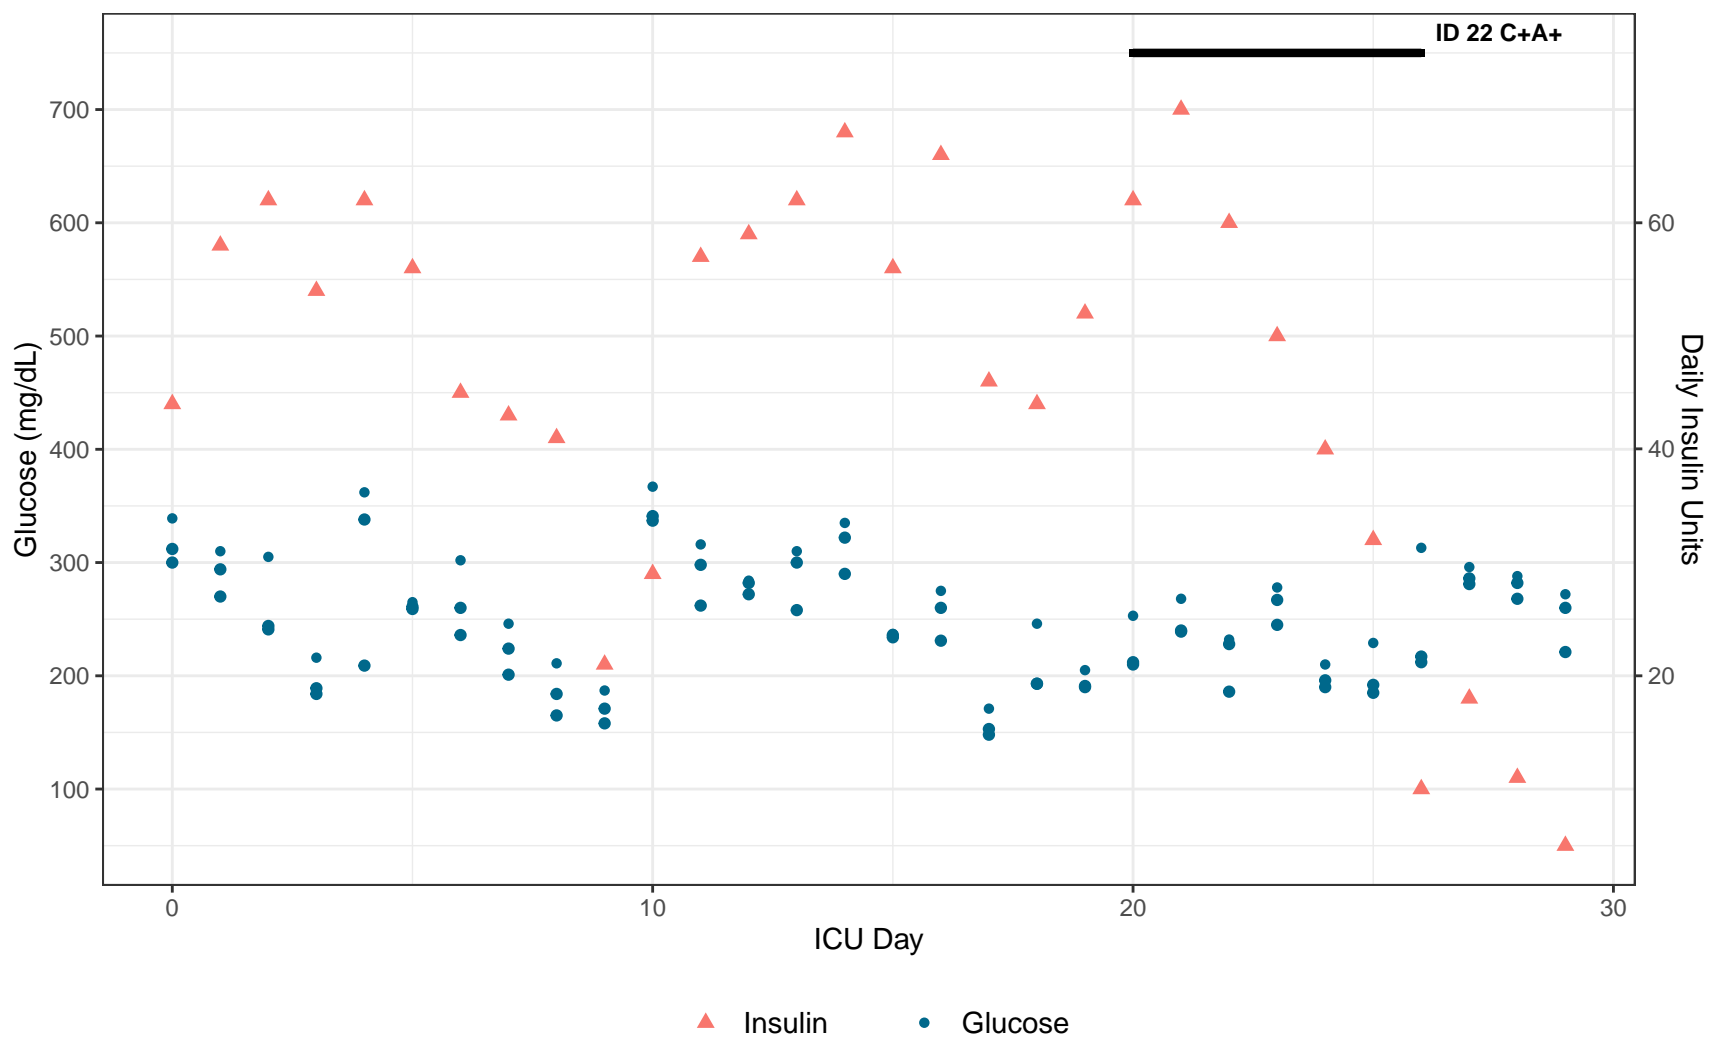

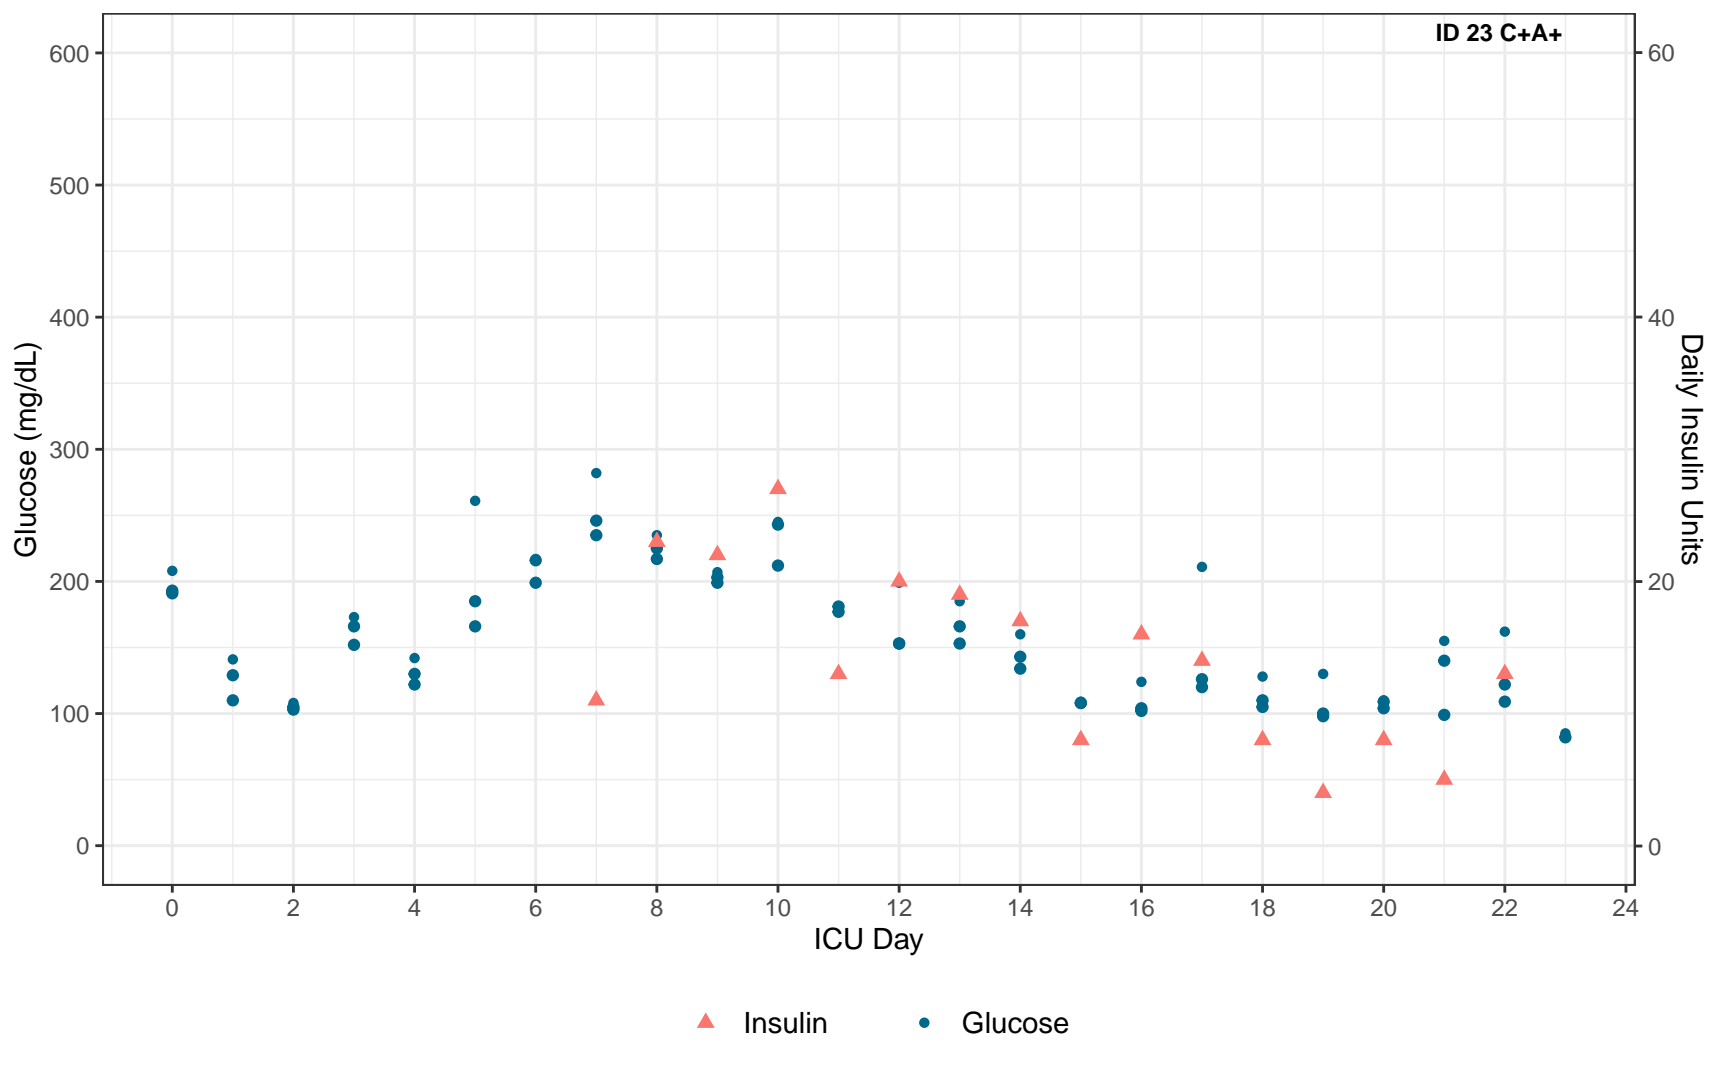

ID 24 C+A+

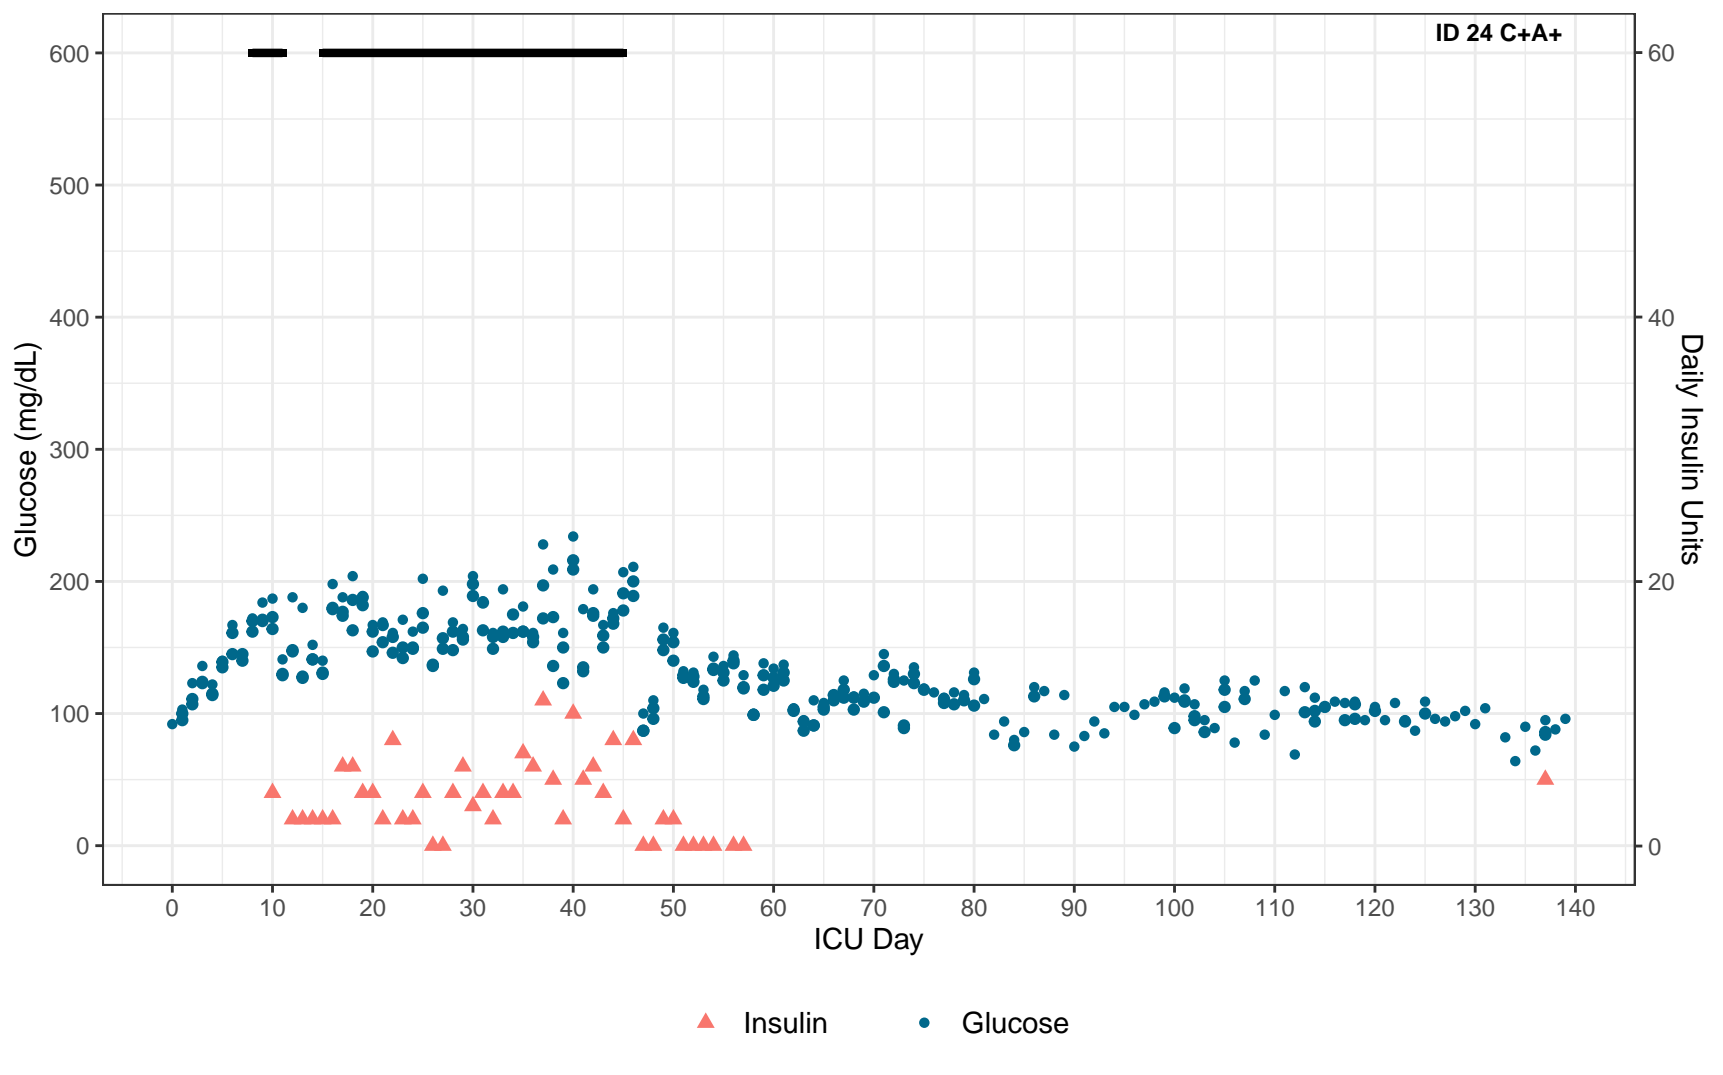

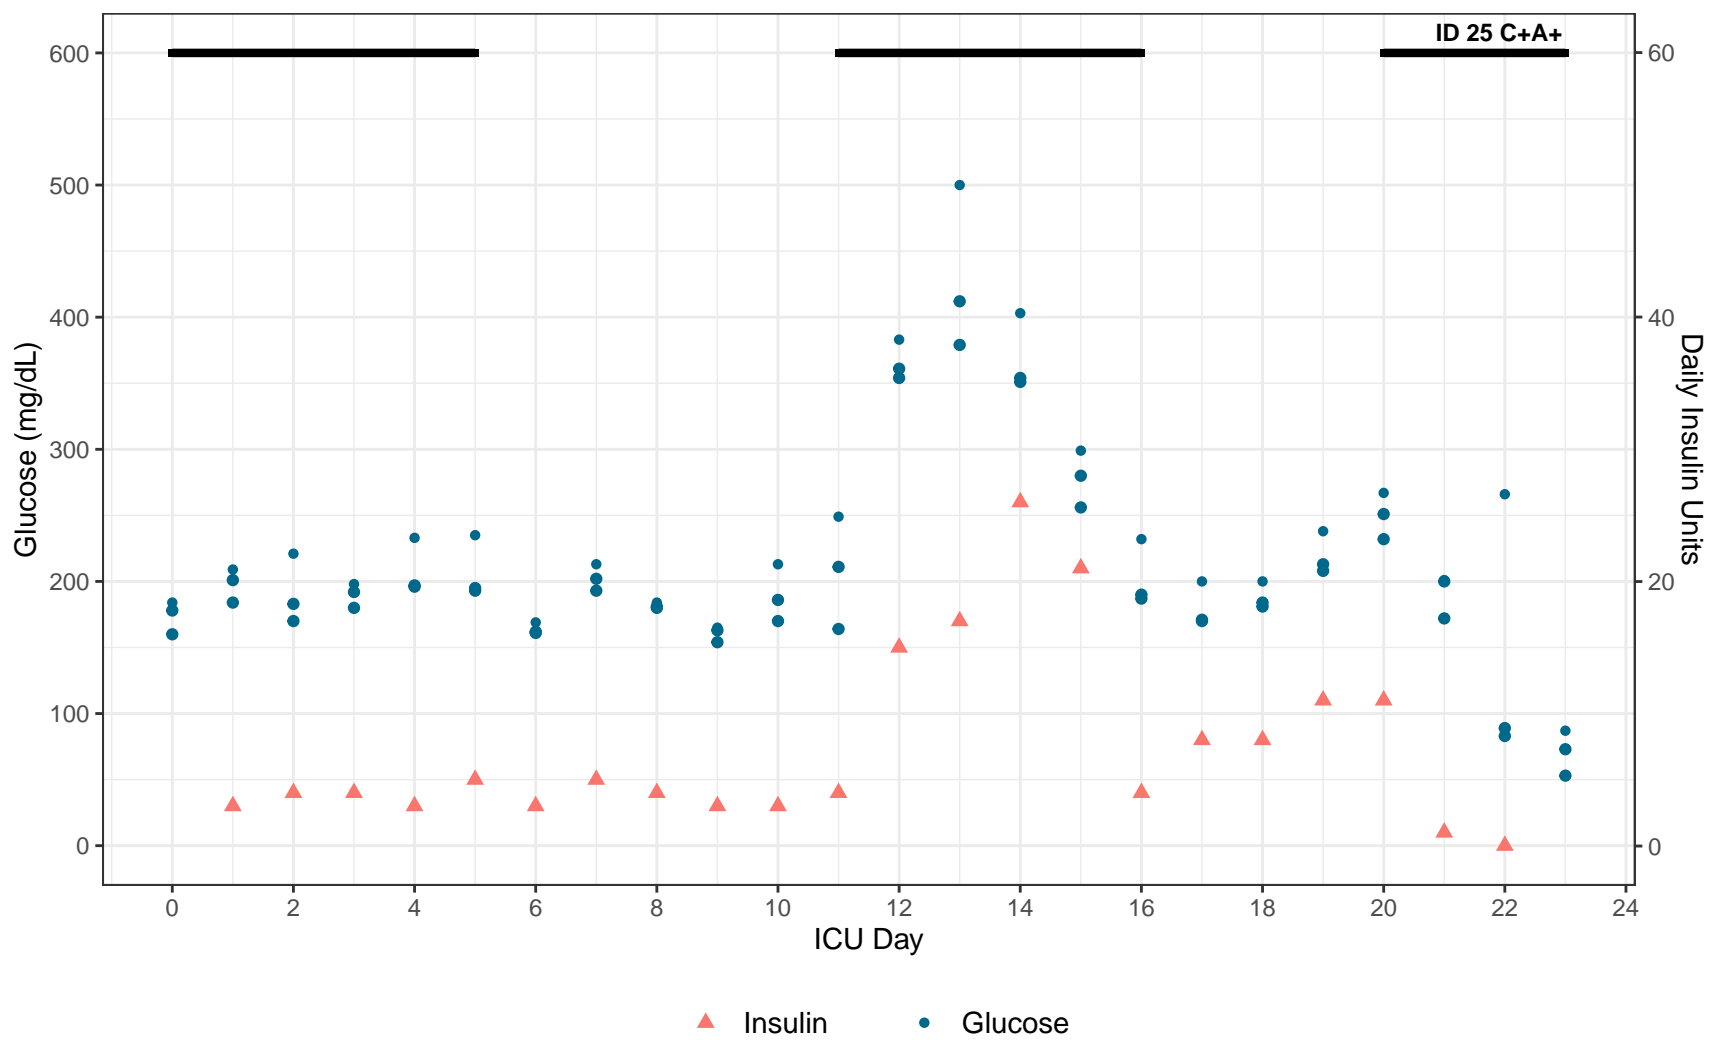



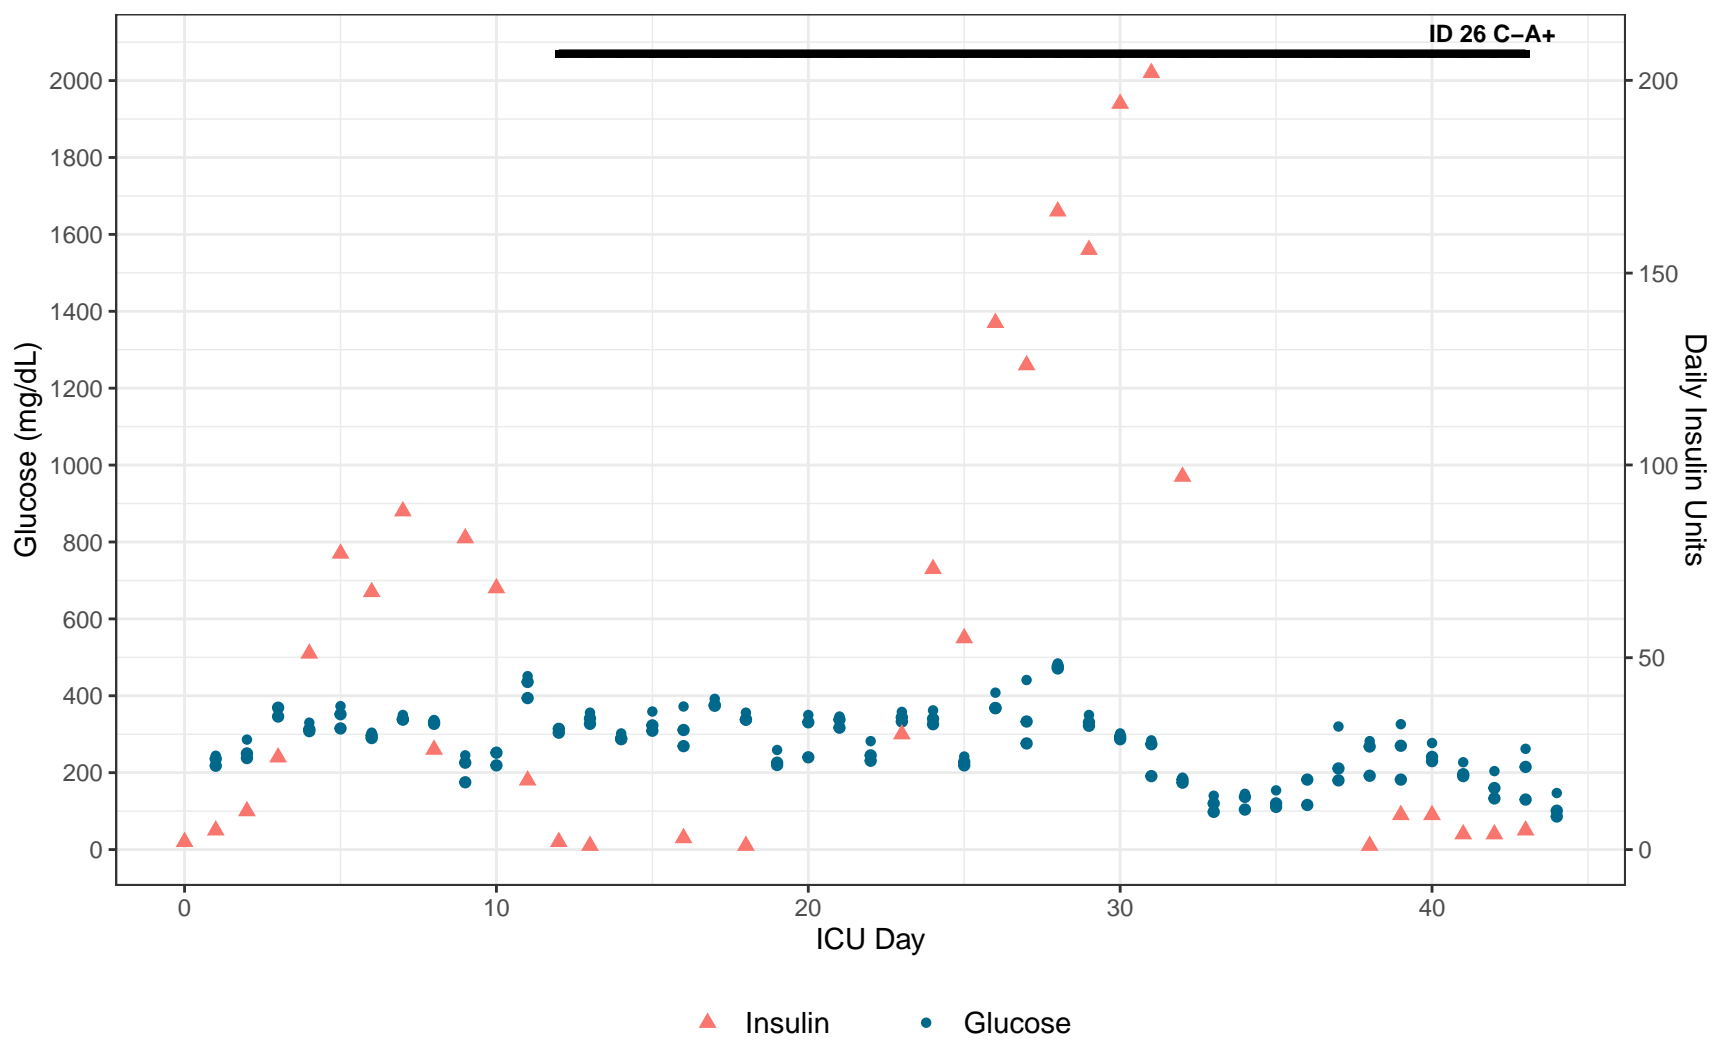

ID 27 C+A+

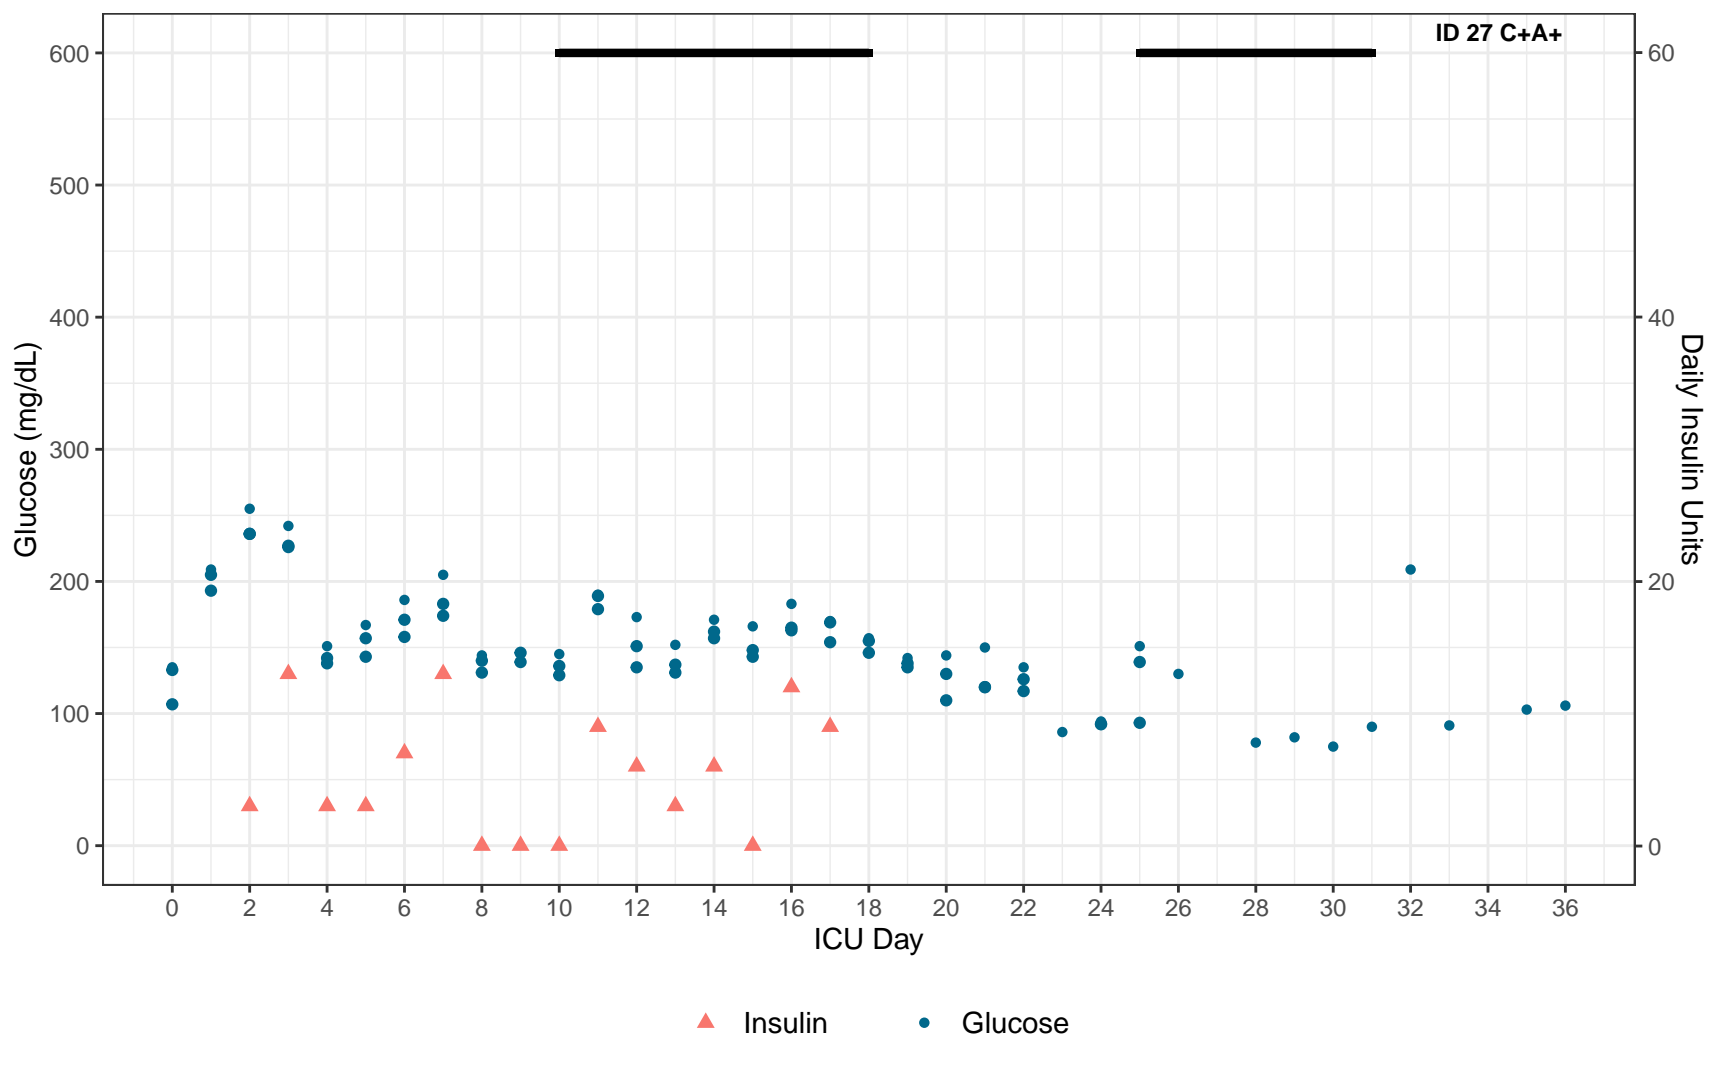

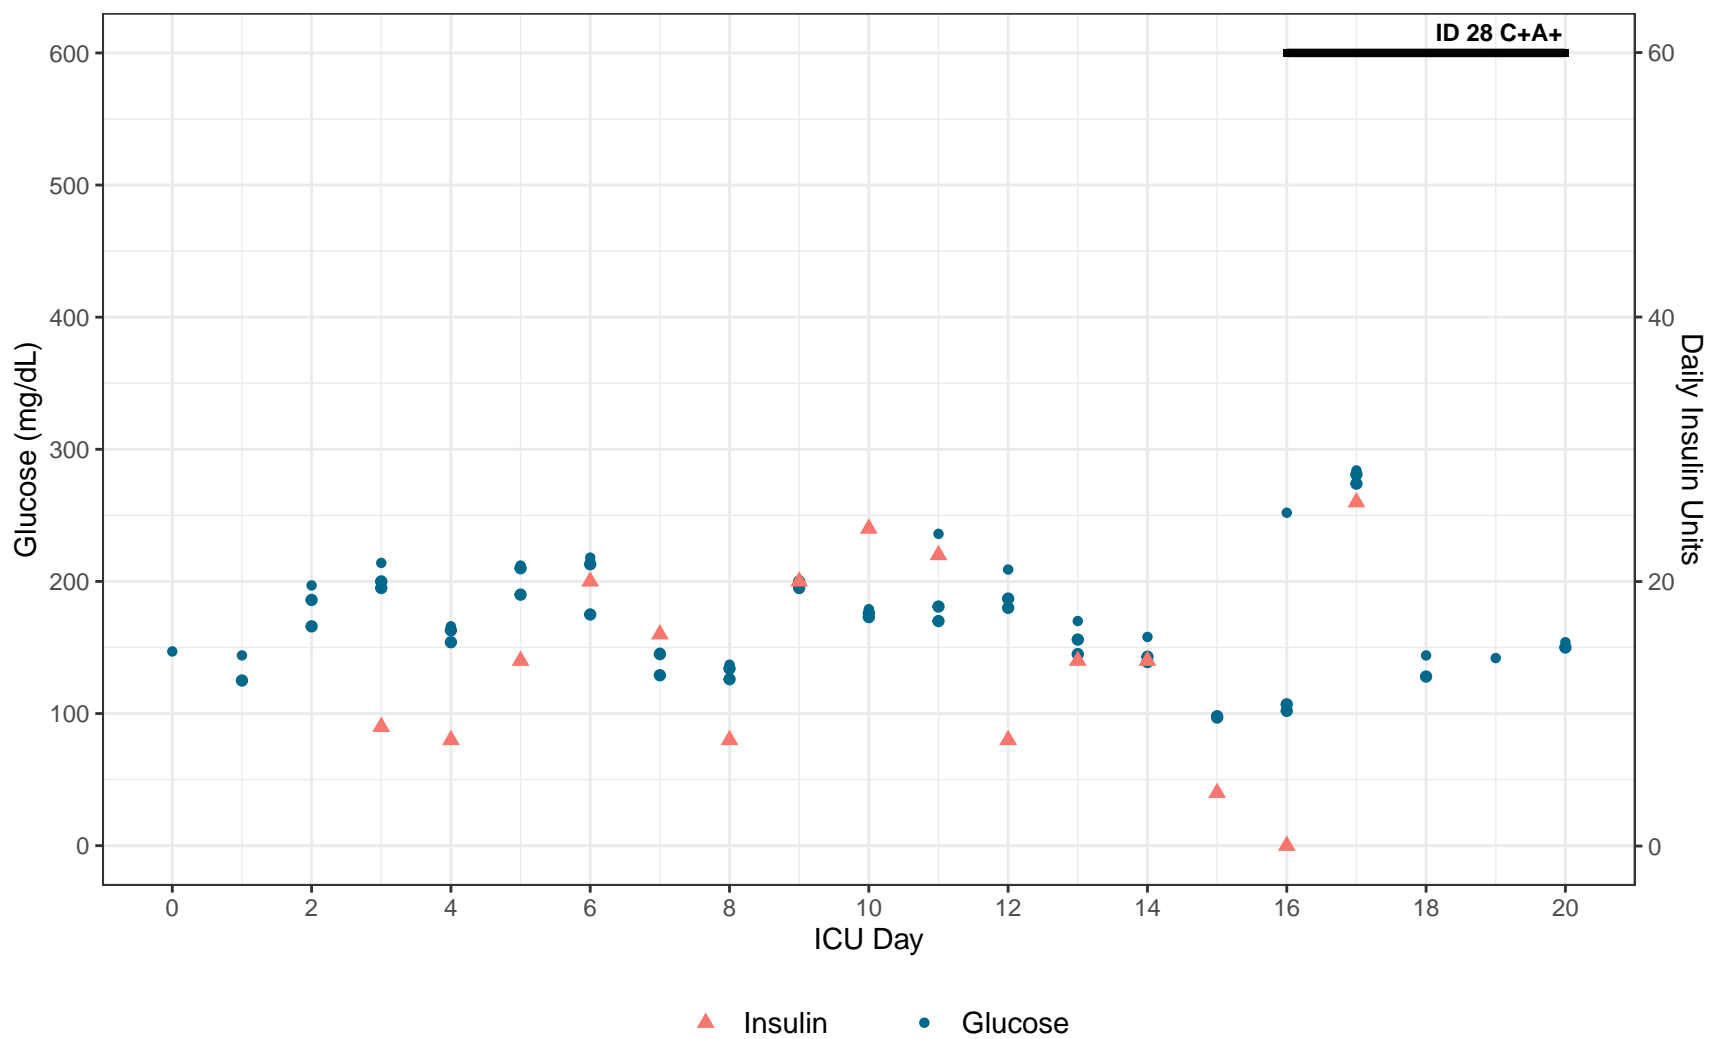

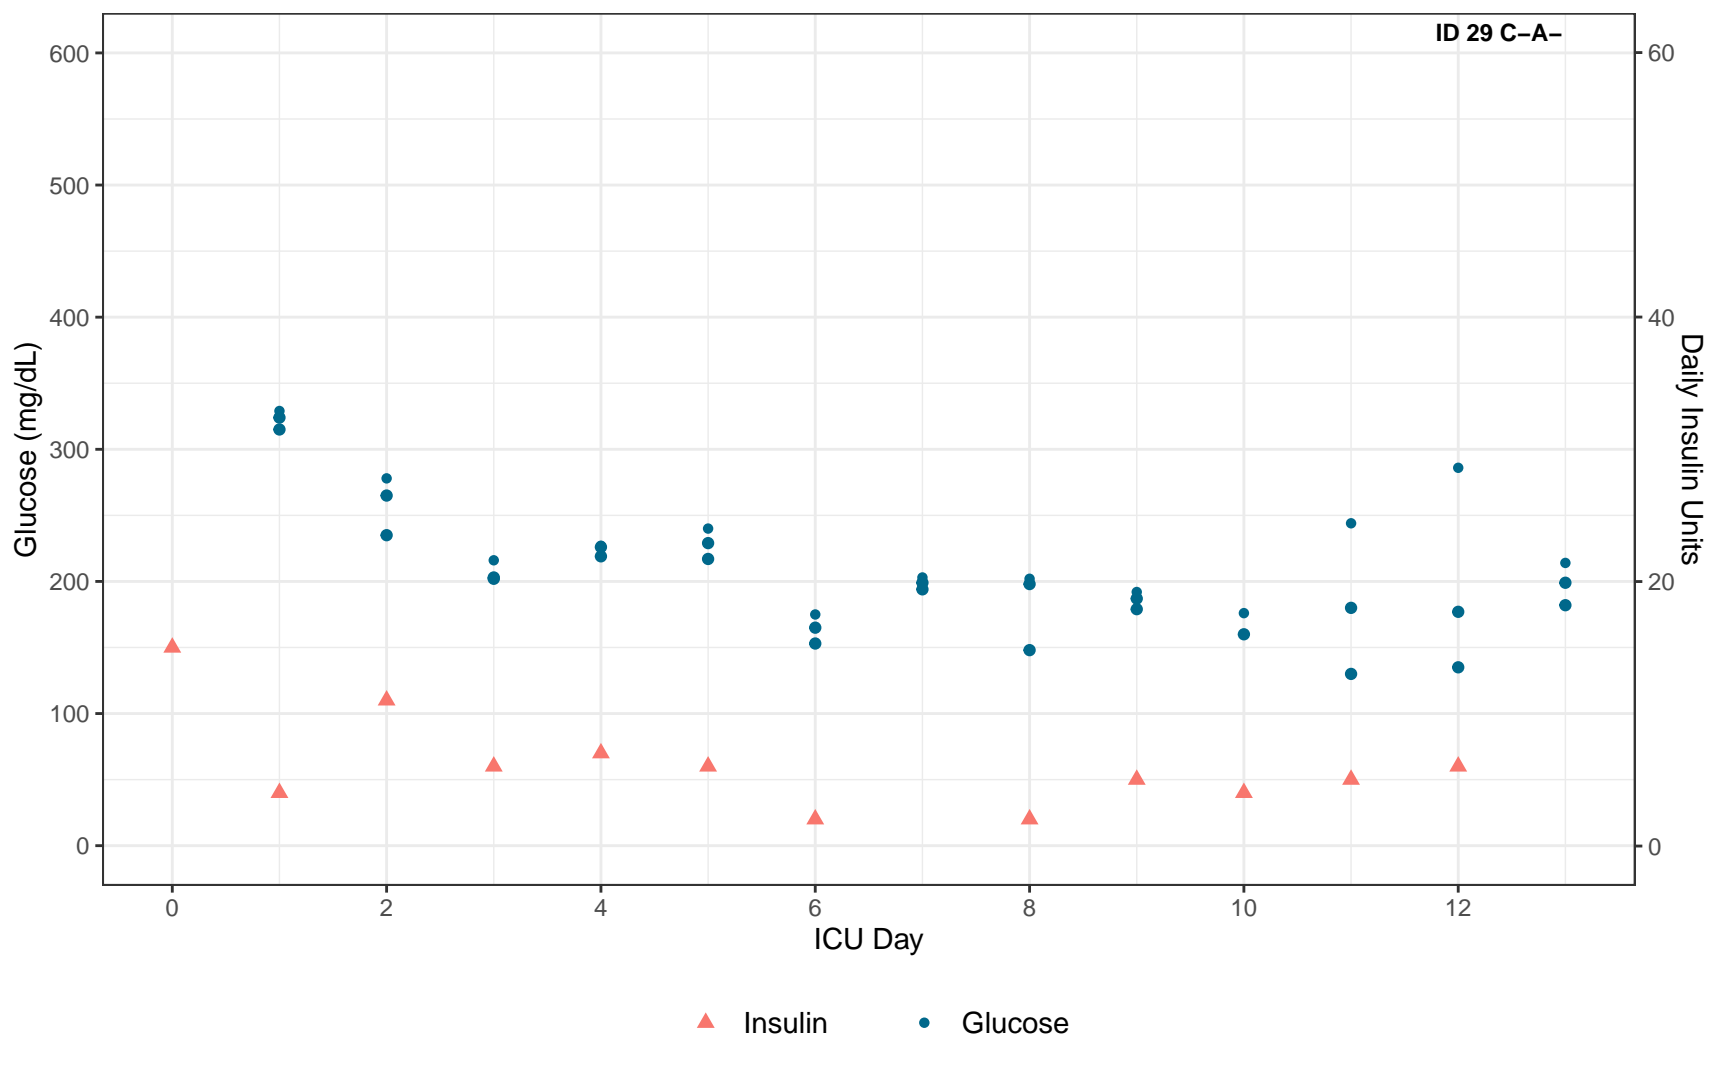

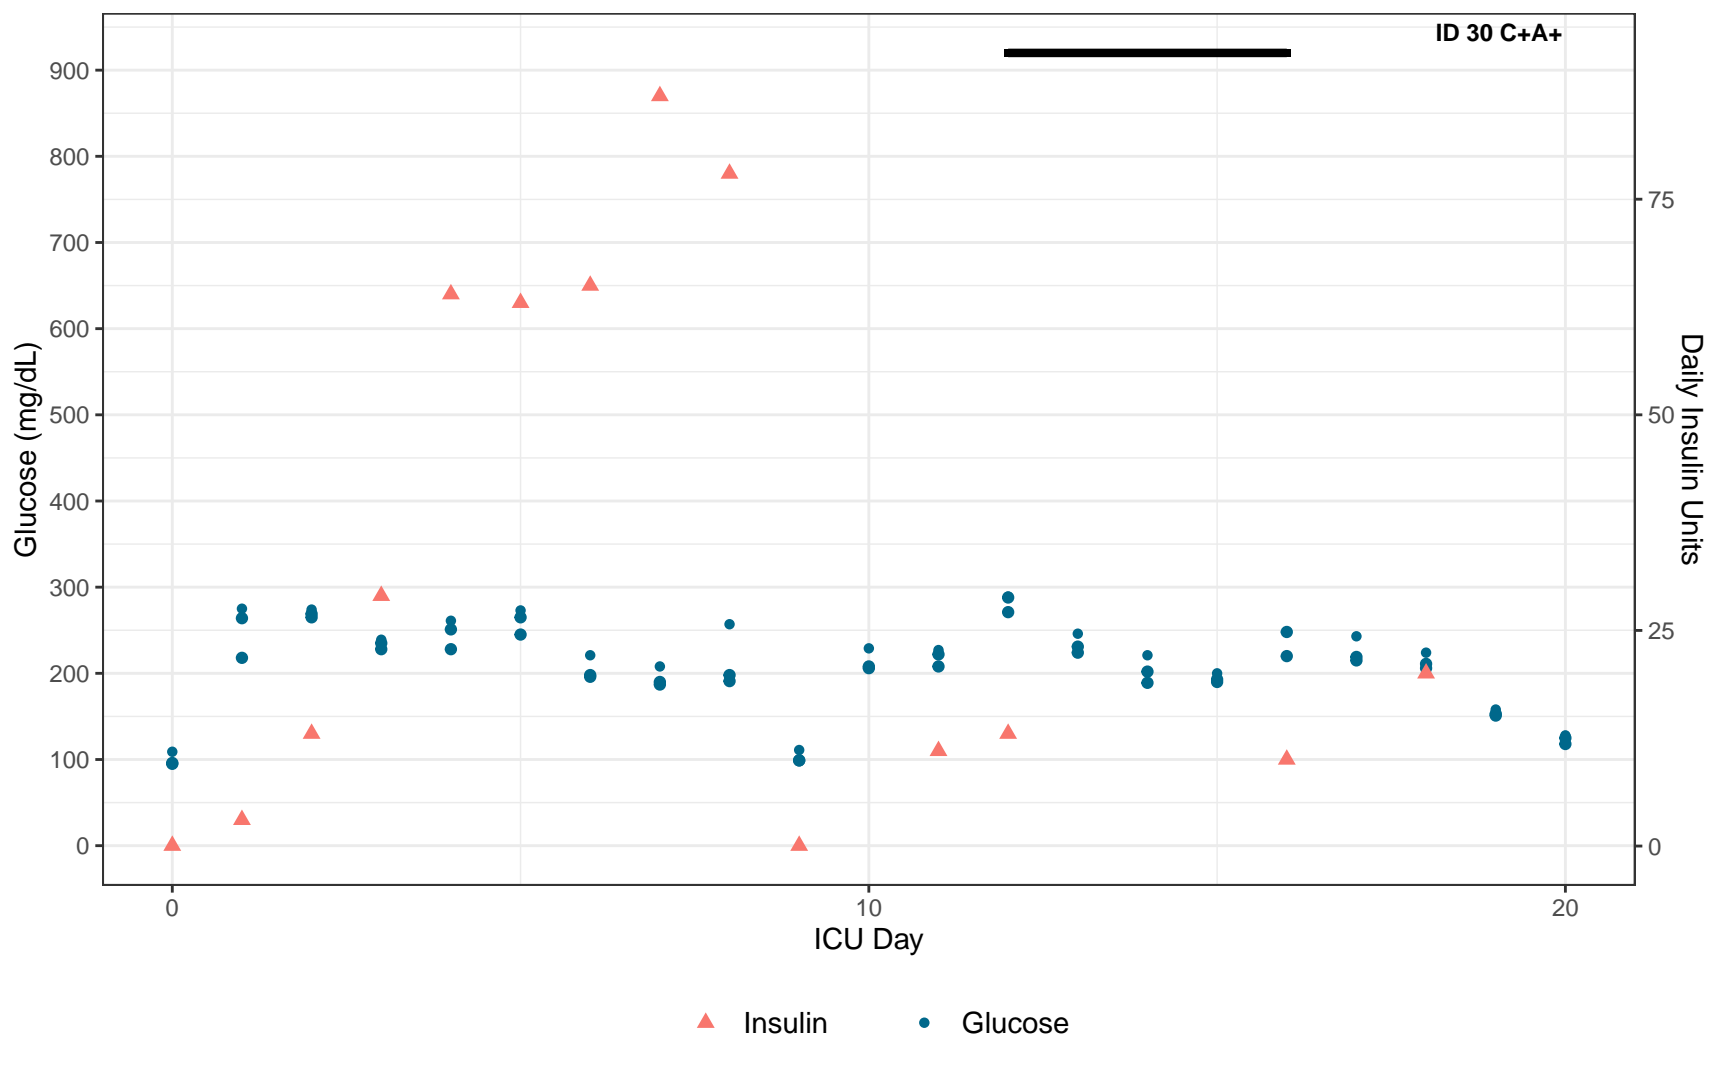

ID 31 C+A+

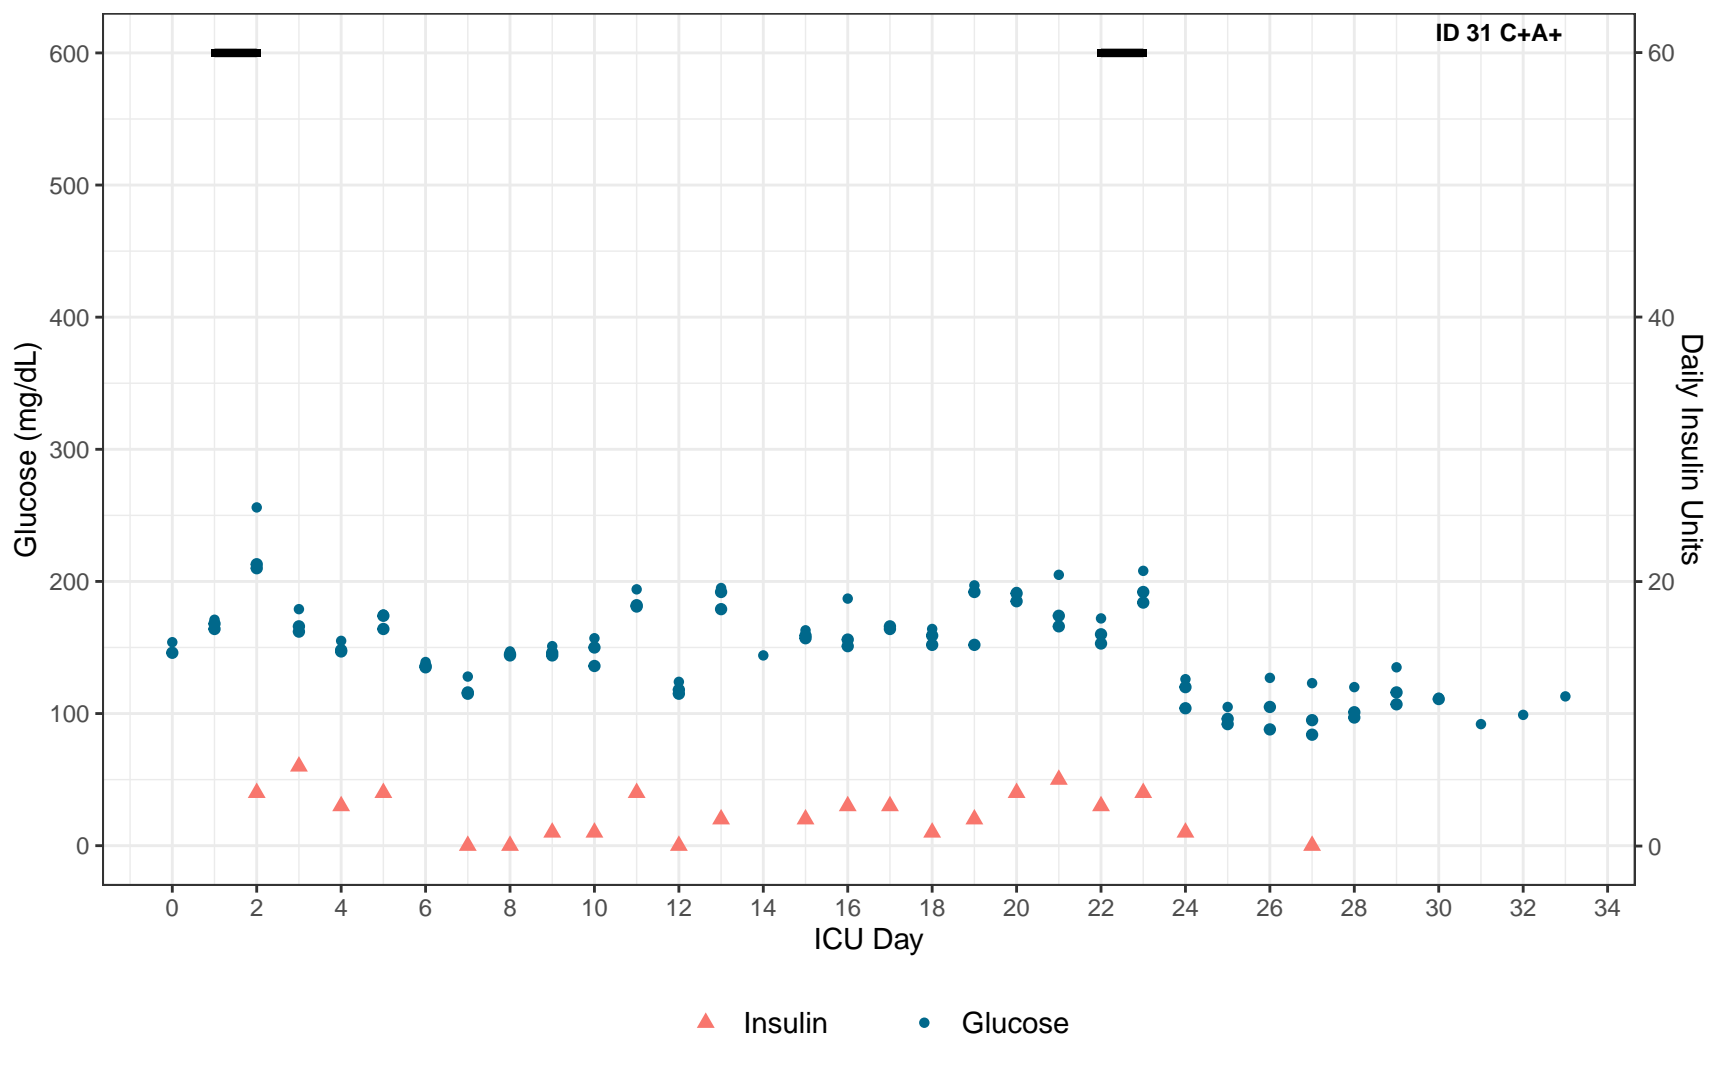

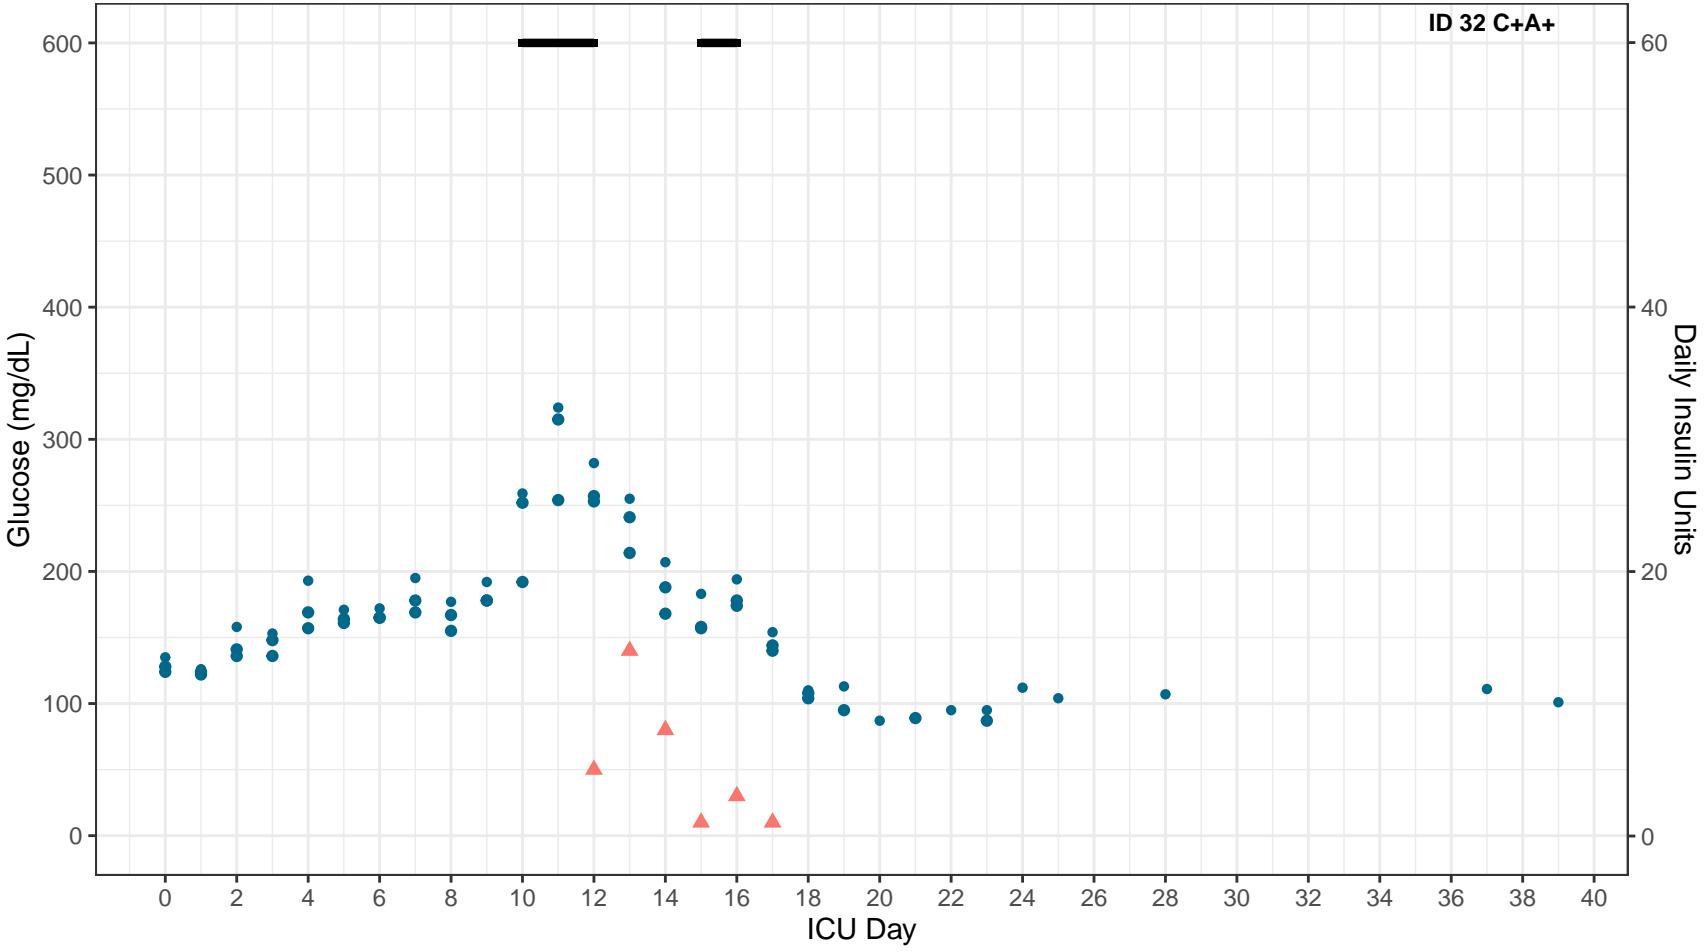

▲ Insulin      ● Glucose

ID 33 C-A-

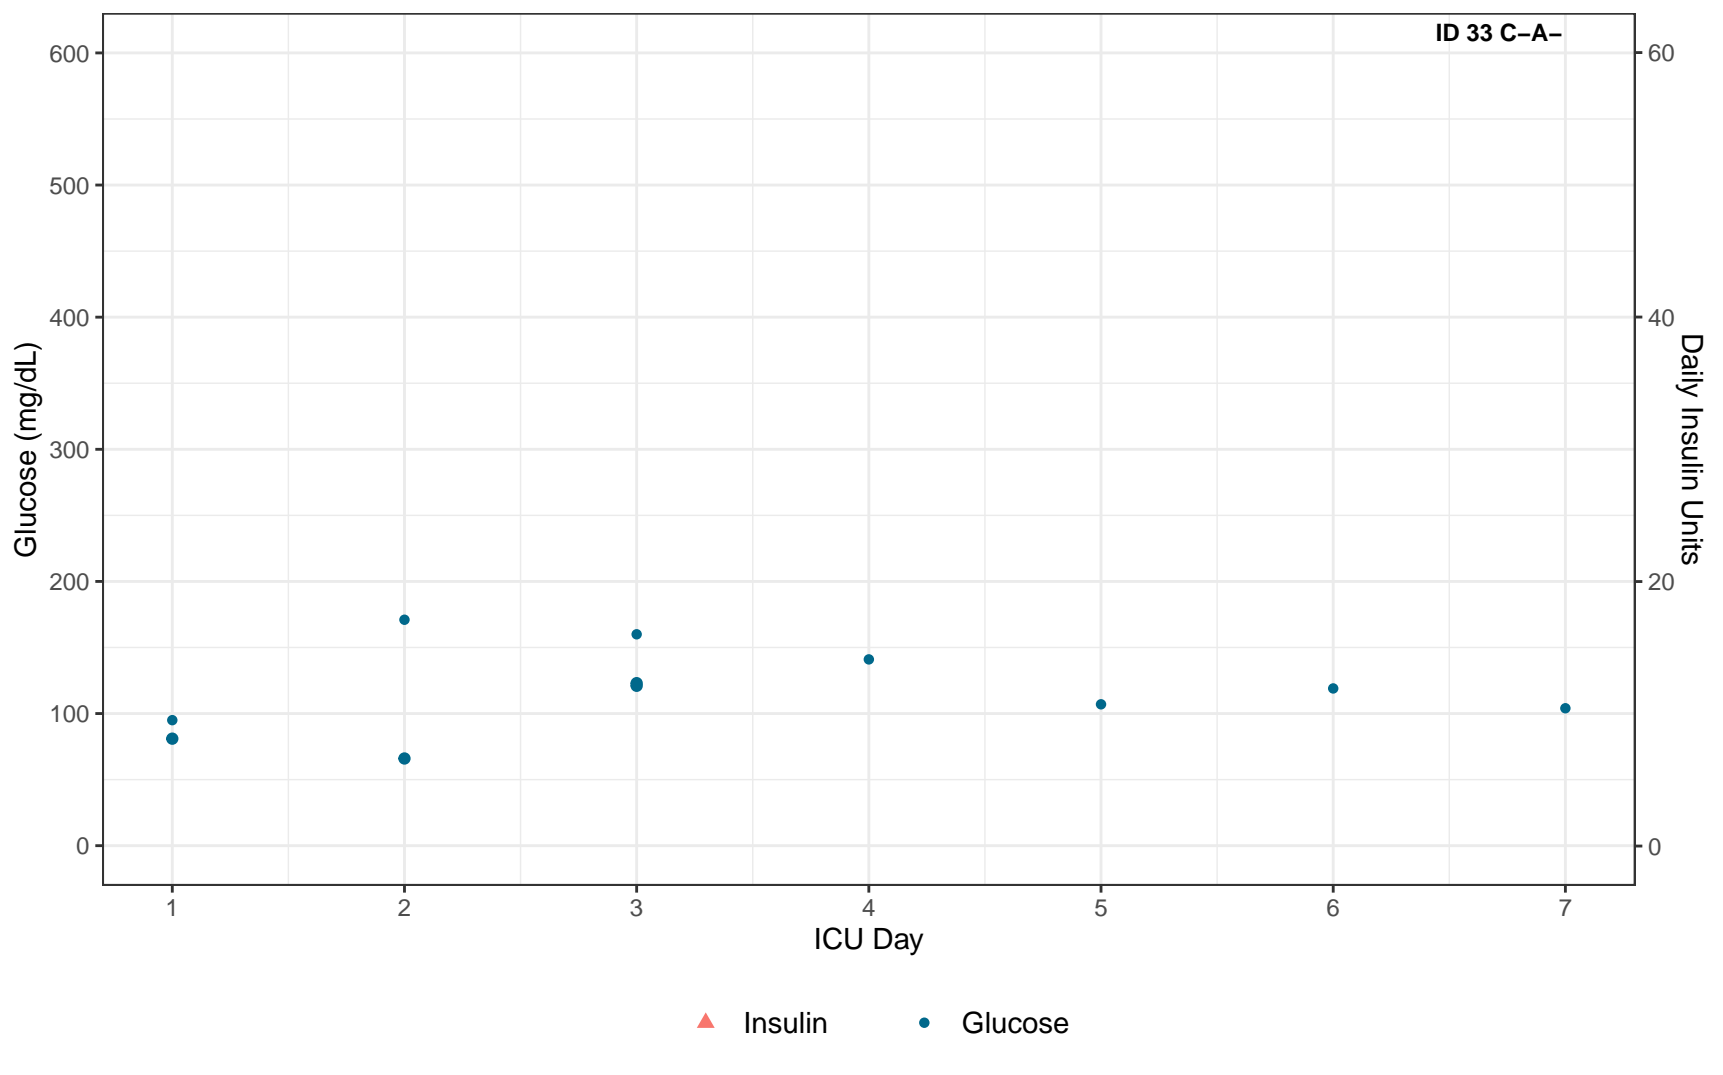



ID 34 C-A-

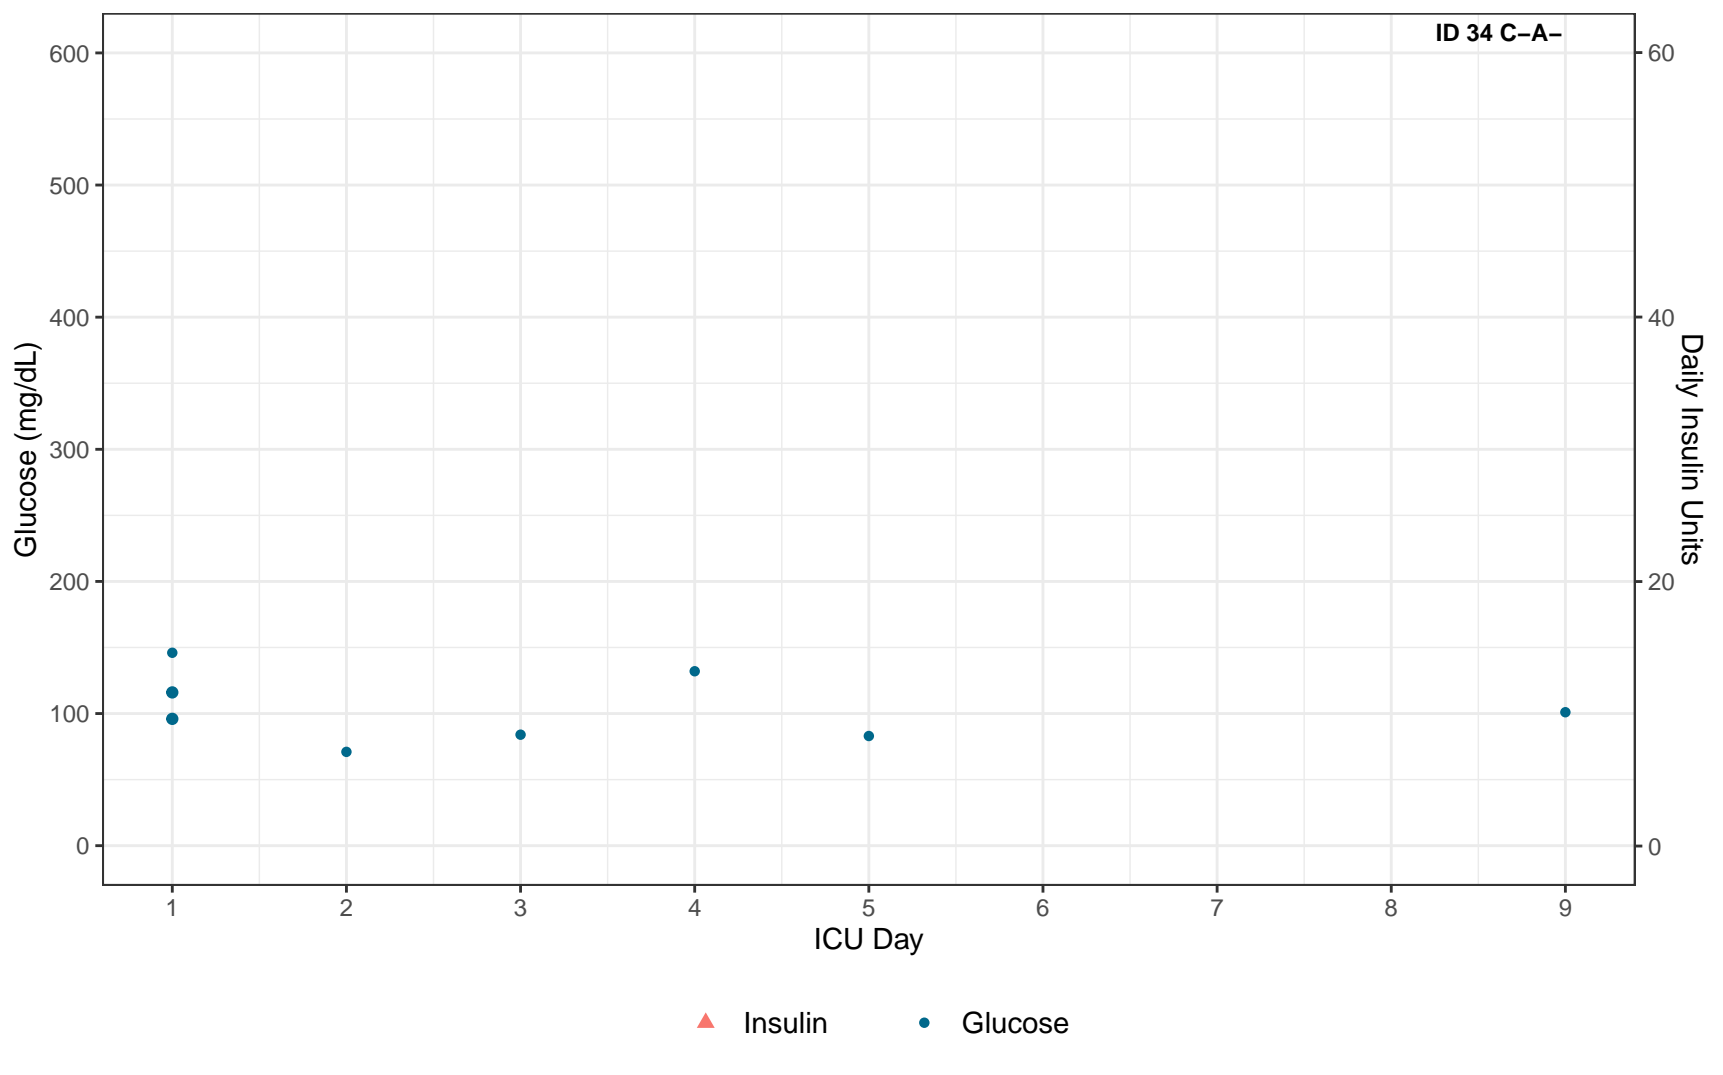

**ID 35 C-A+**

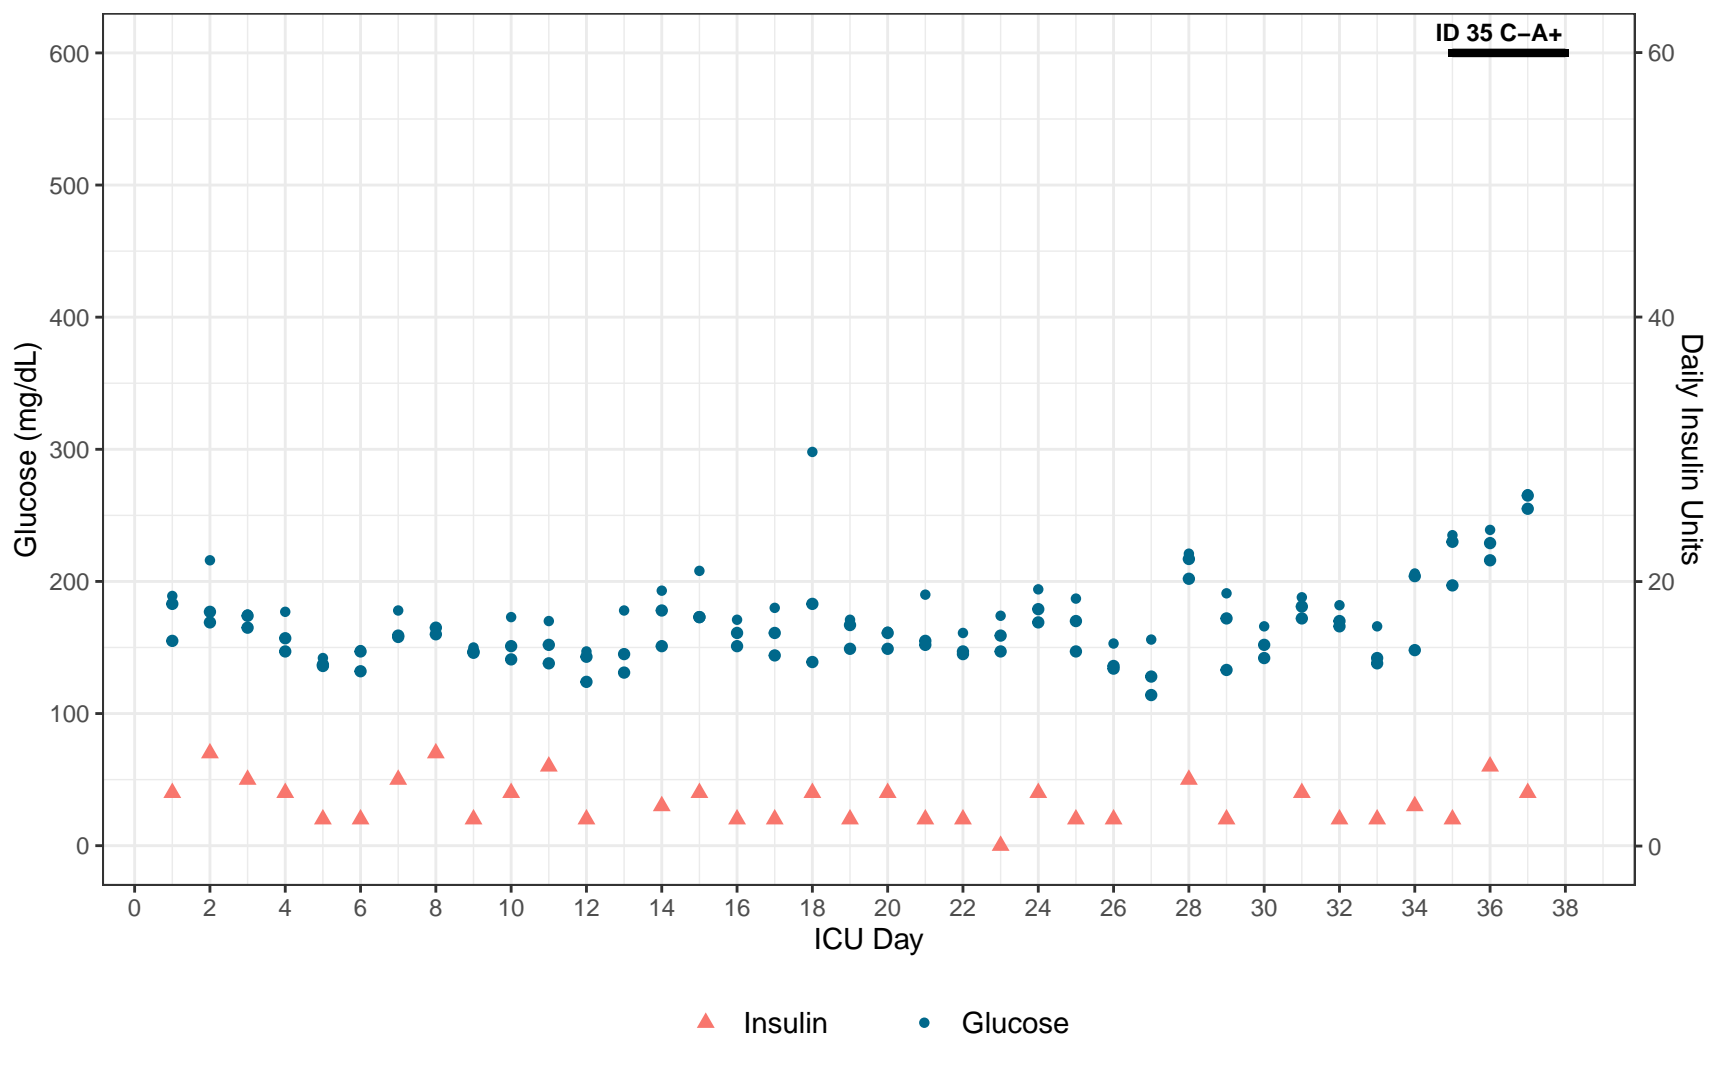

ID 36 C+A+

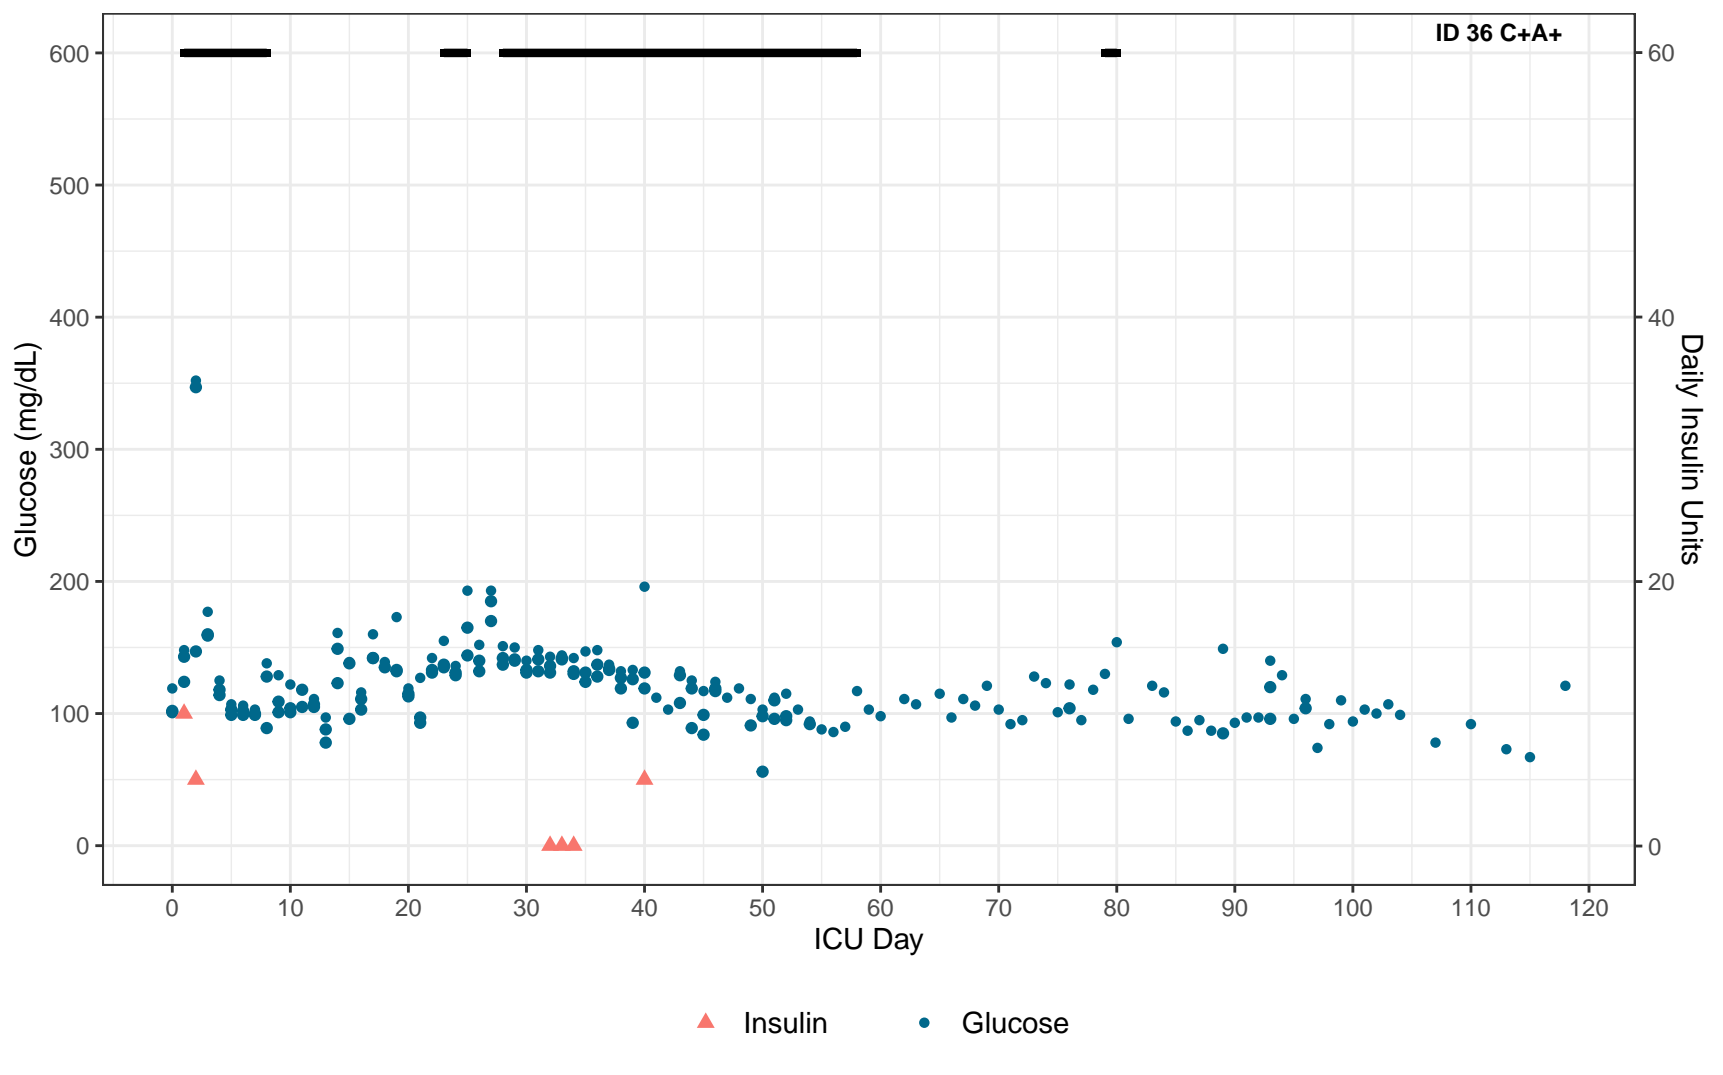

ID 37 C-A+

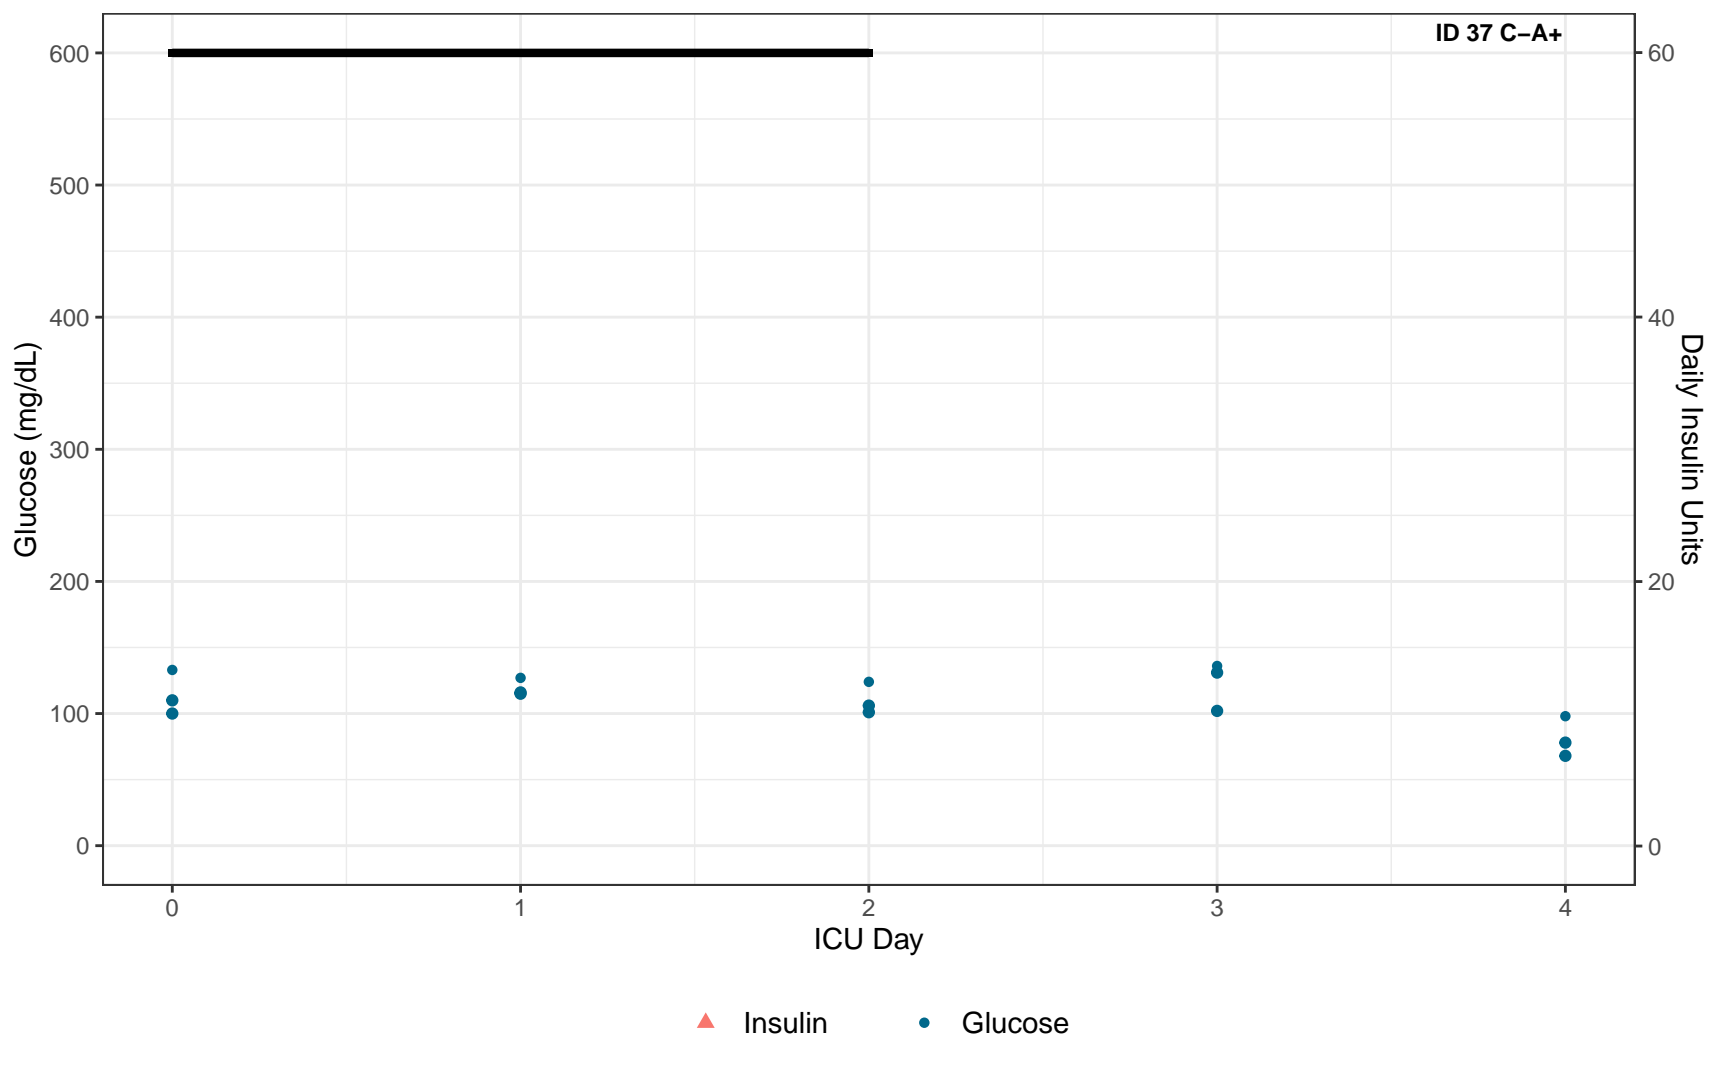

ID 38 C-A+

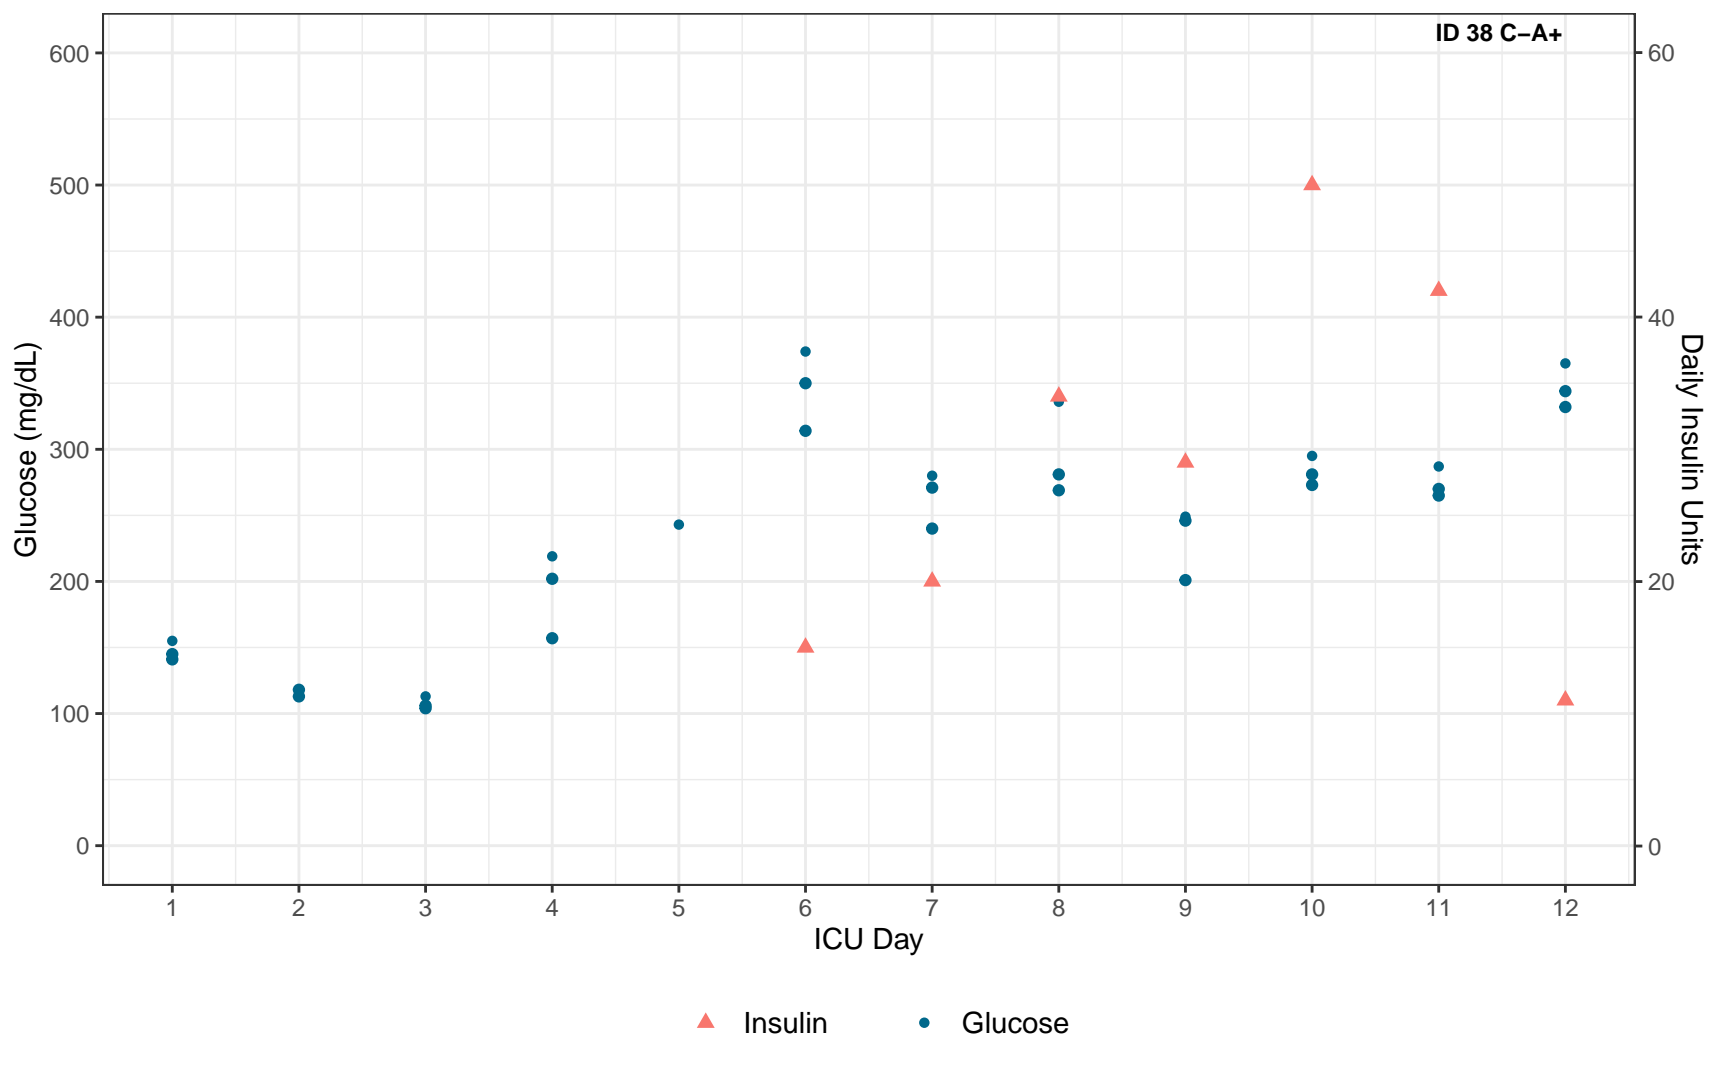

ID 39 C-A-

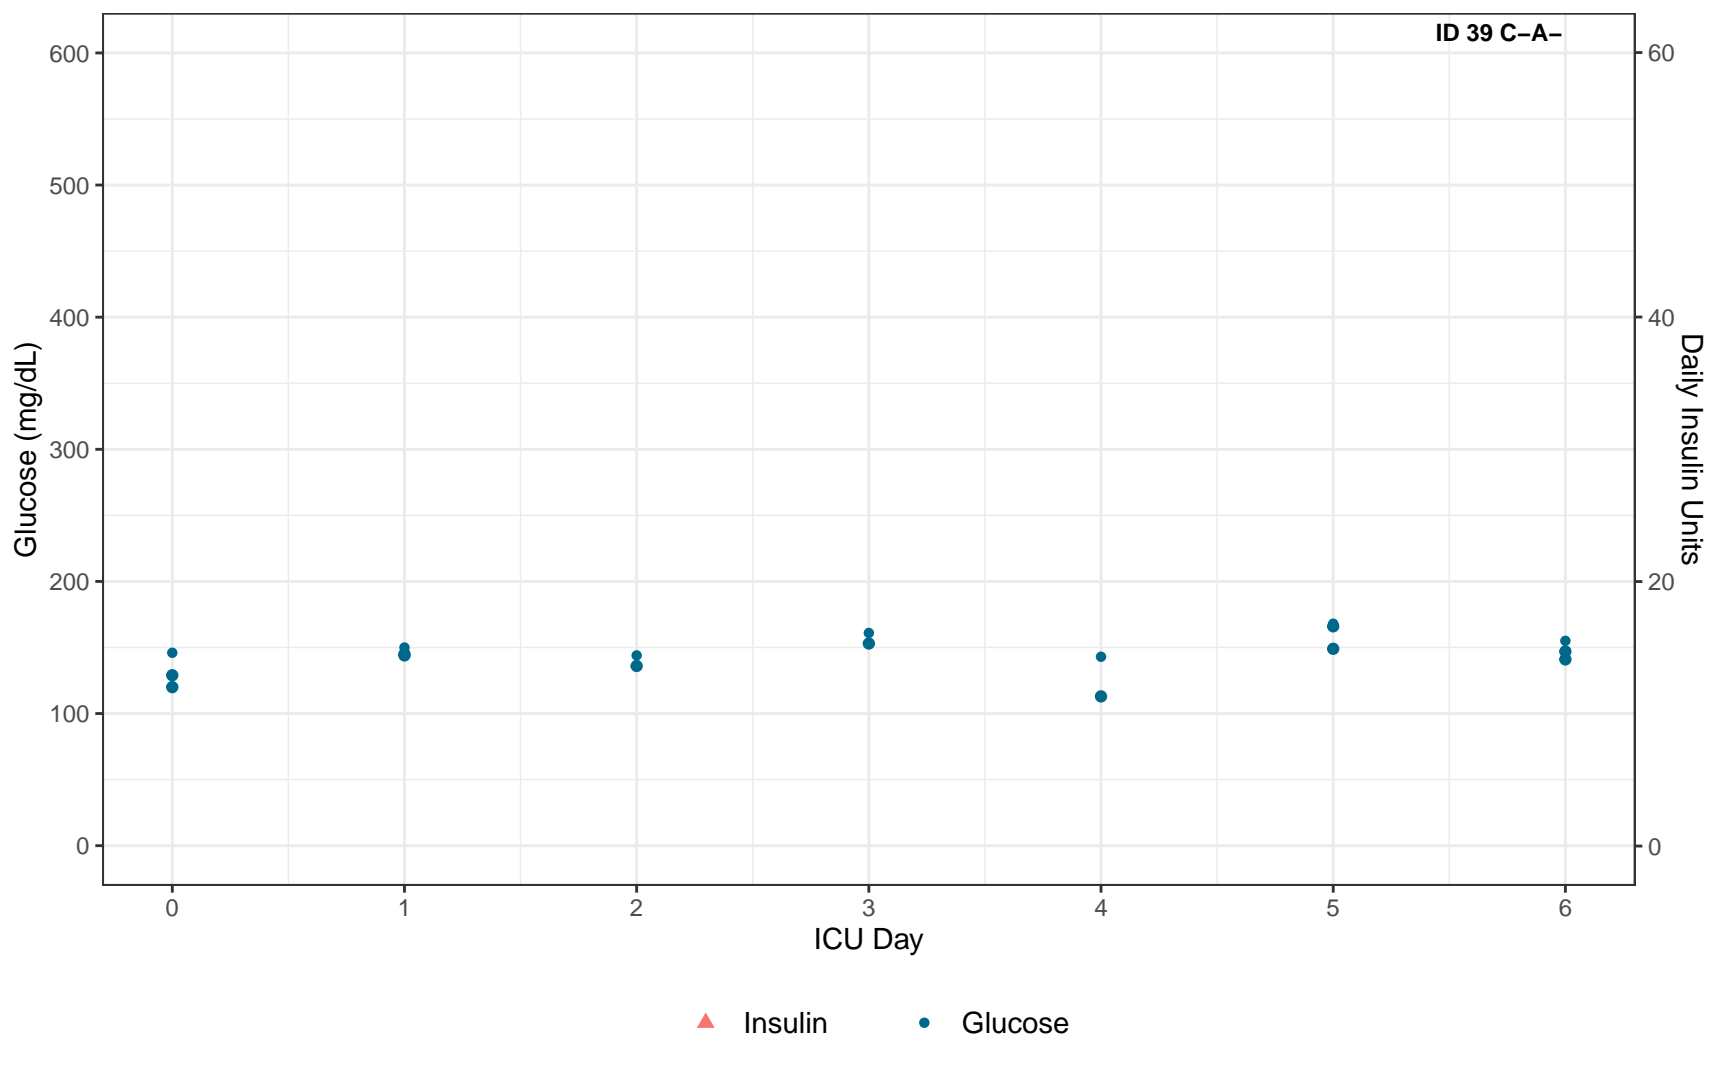

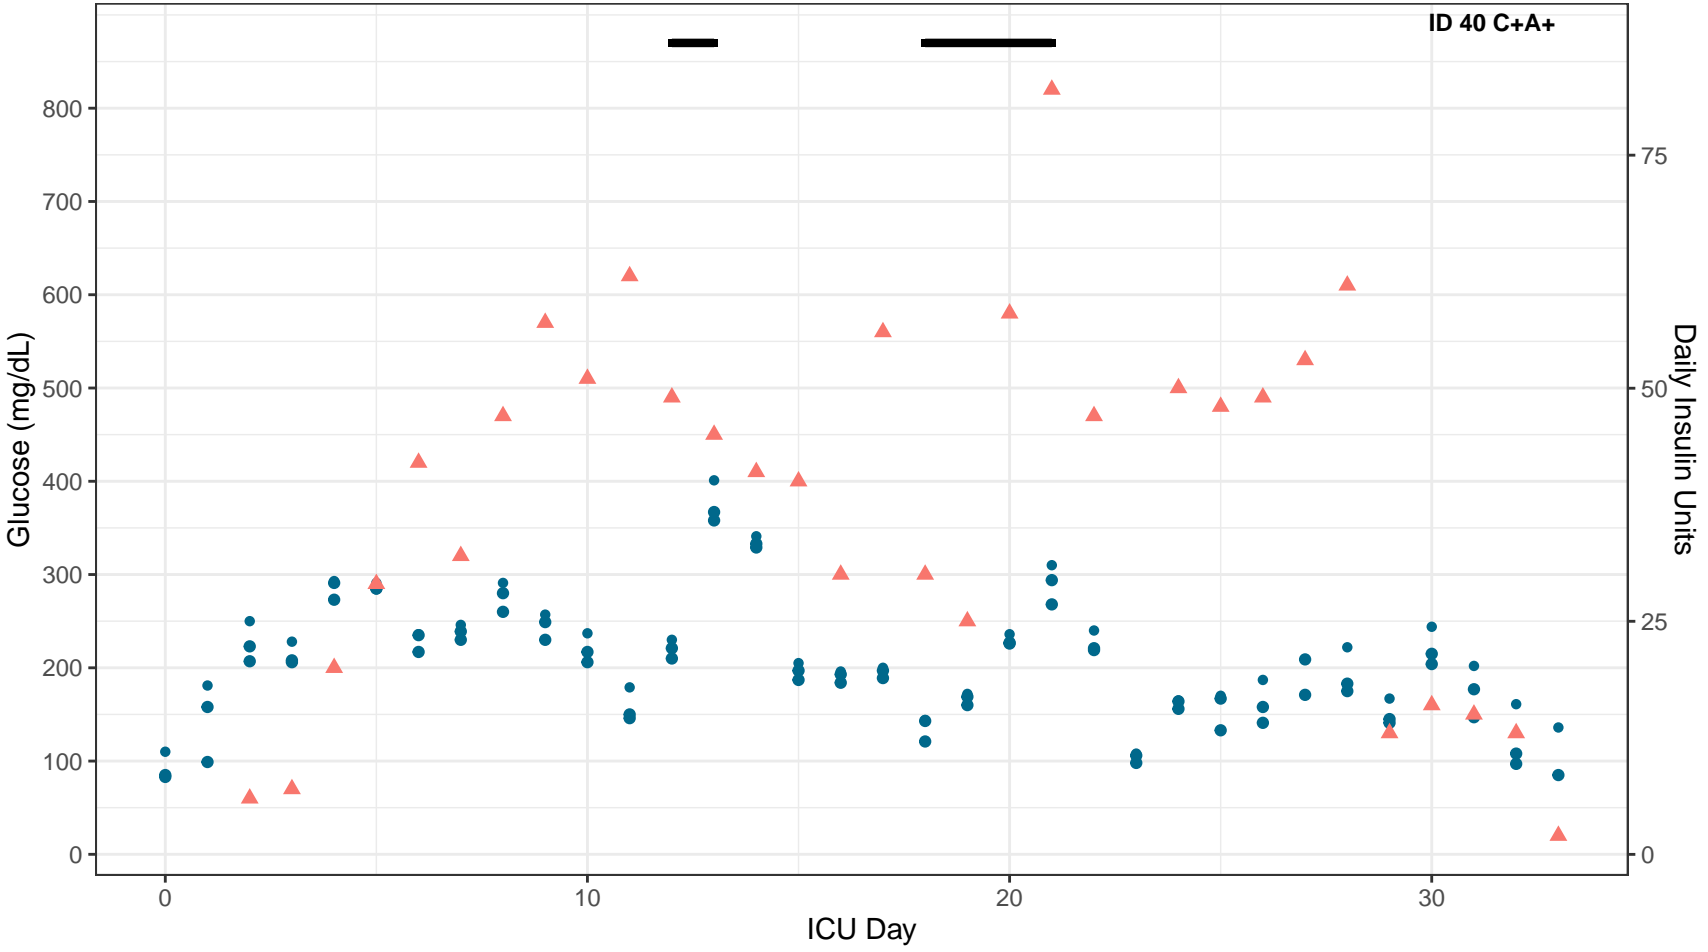

▲ Insulin      ● Glucose

ID 41 C-A-

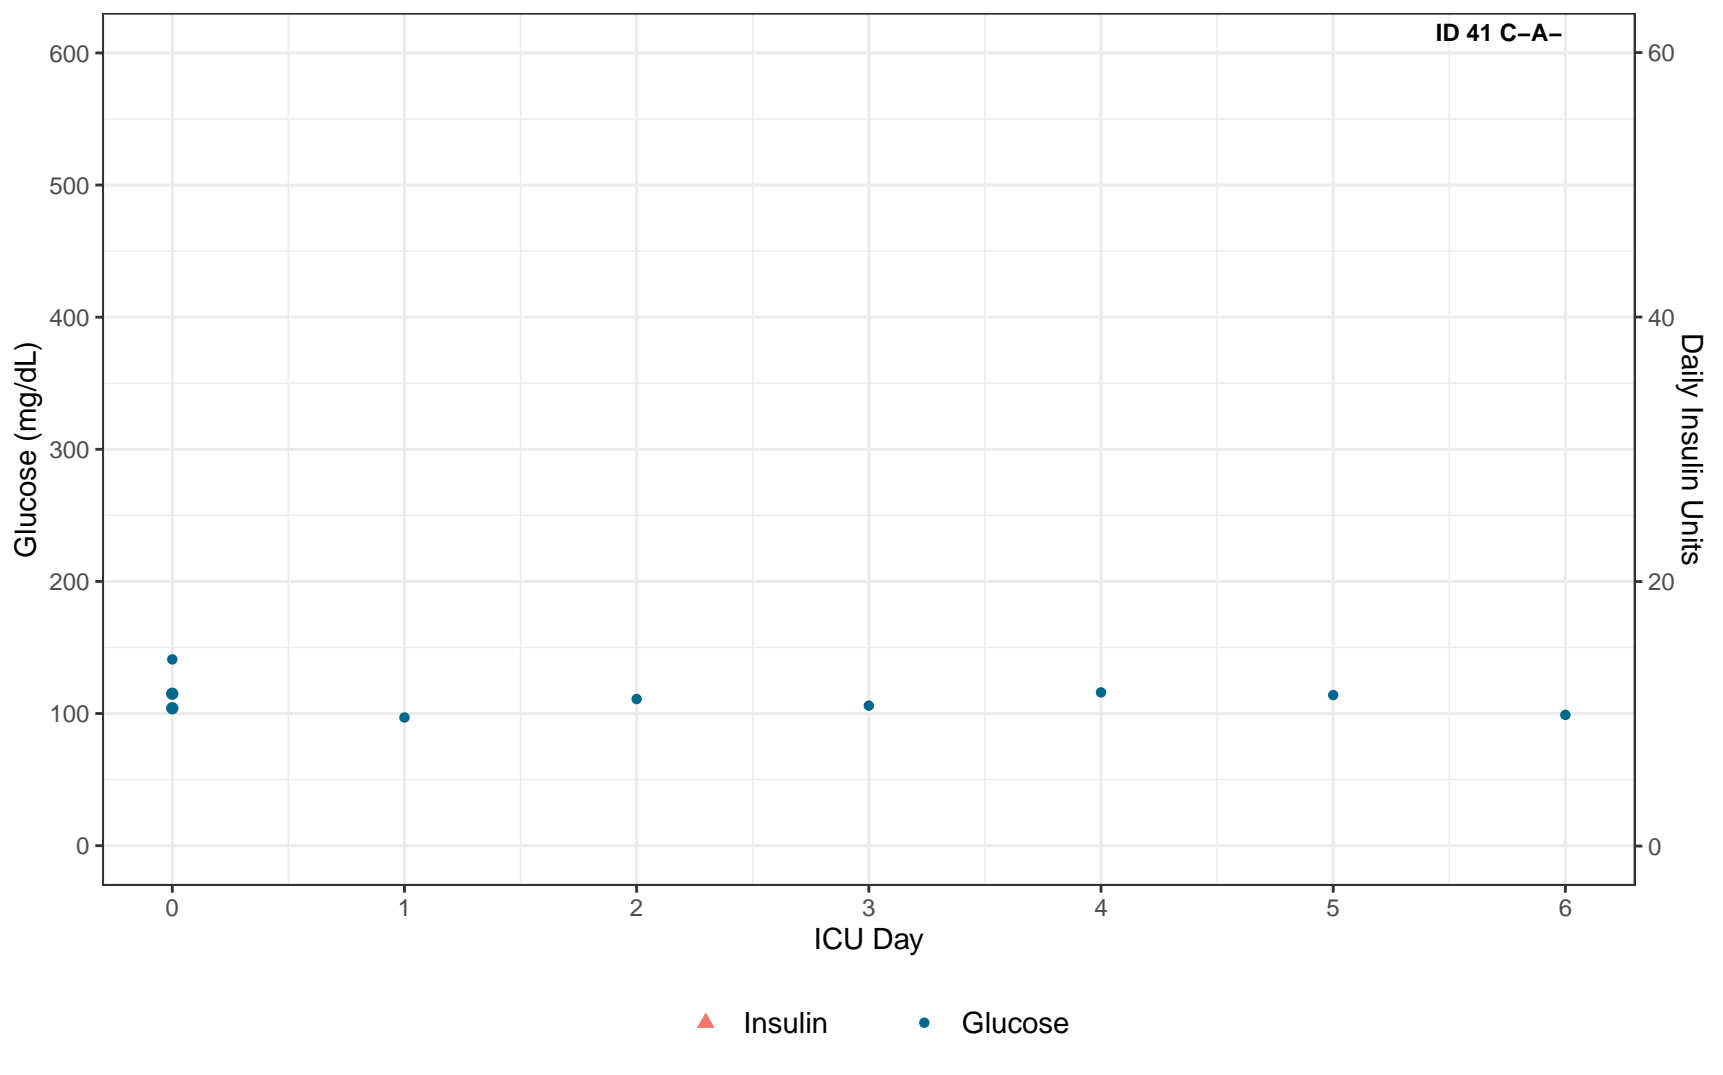



ID 42 C-A-

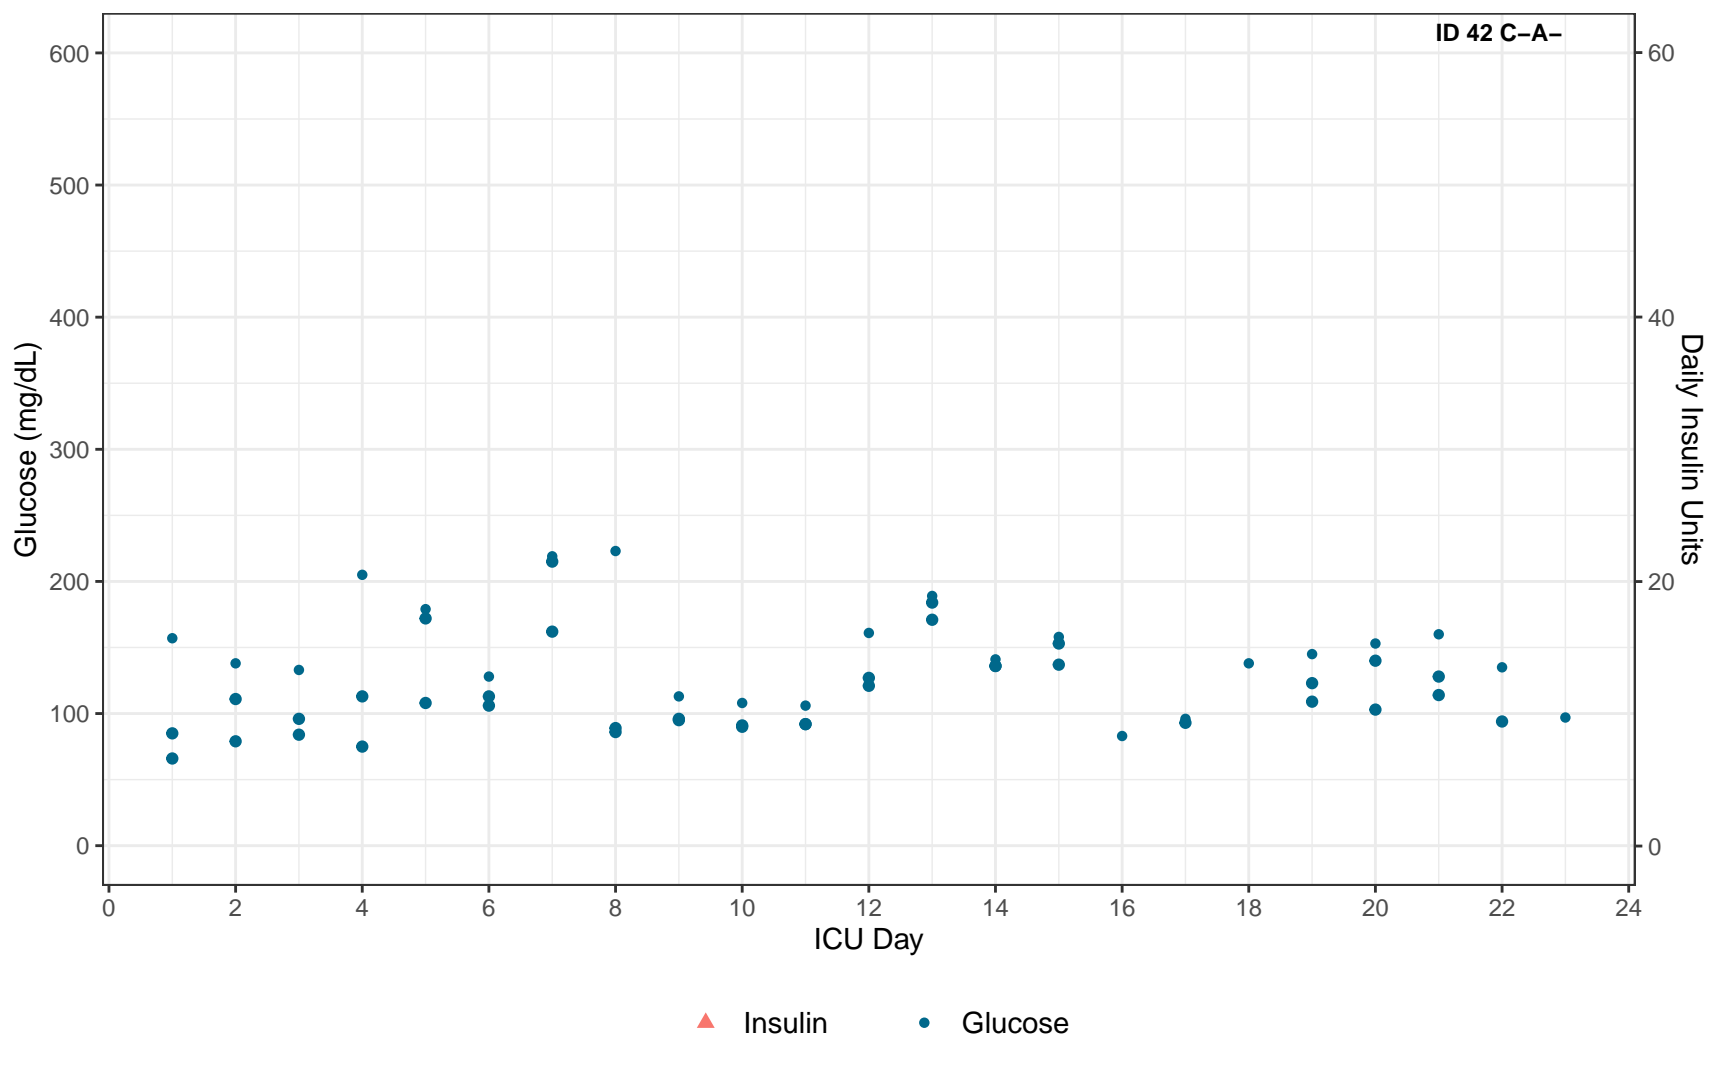

ID 43 C-A+

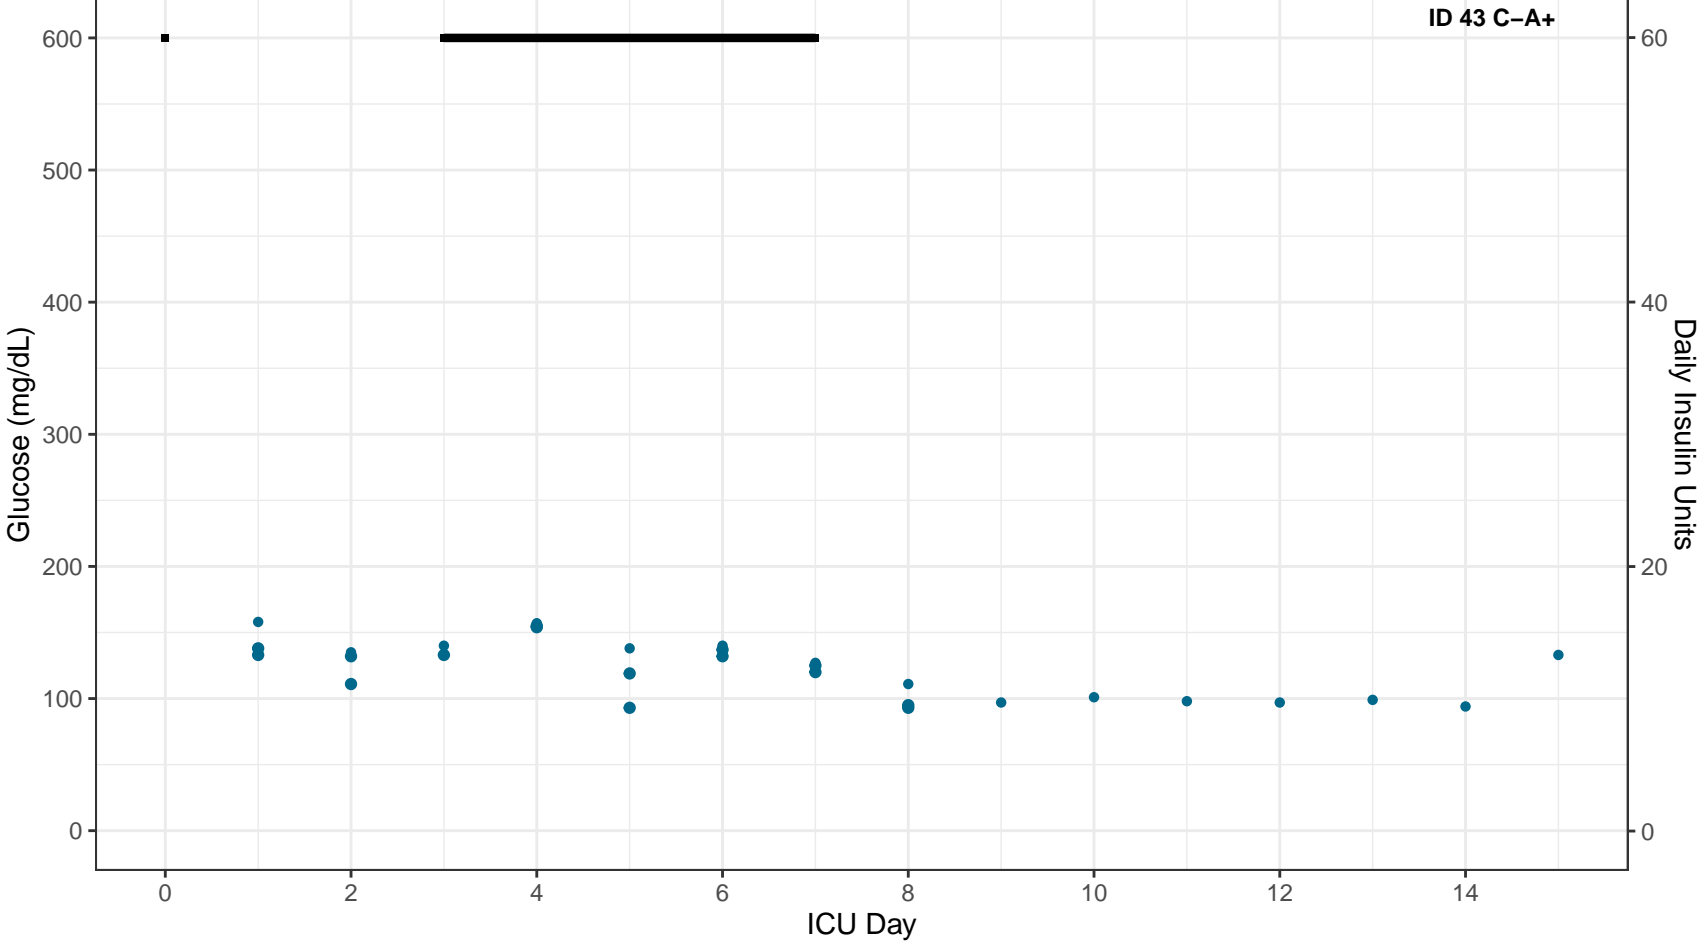

▲ Insulin      ● Glucose

ID 44 C-A+

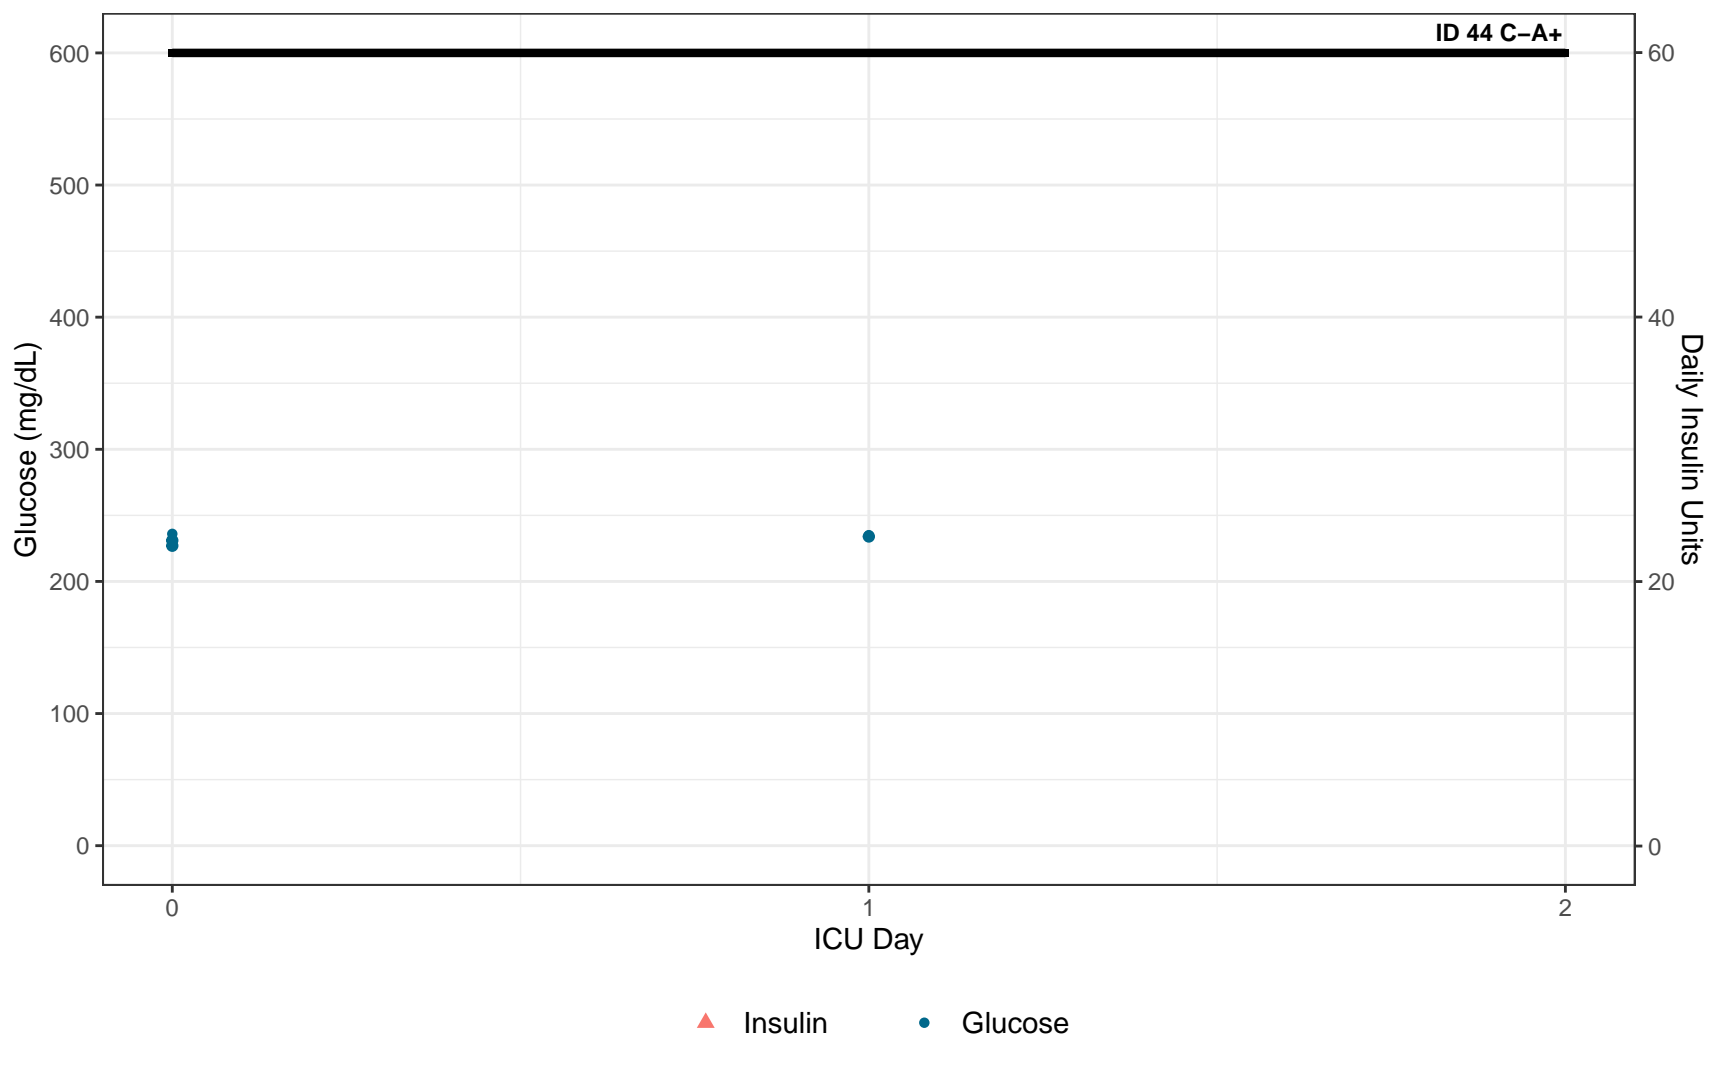

Glucose (mg/dL)

Daily Insulin Units

ICU Day

▲ Insulin      ● Glucose

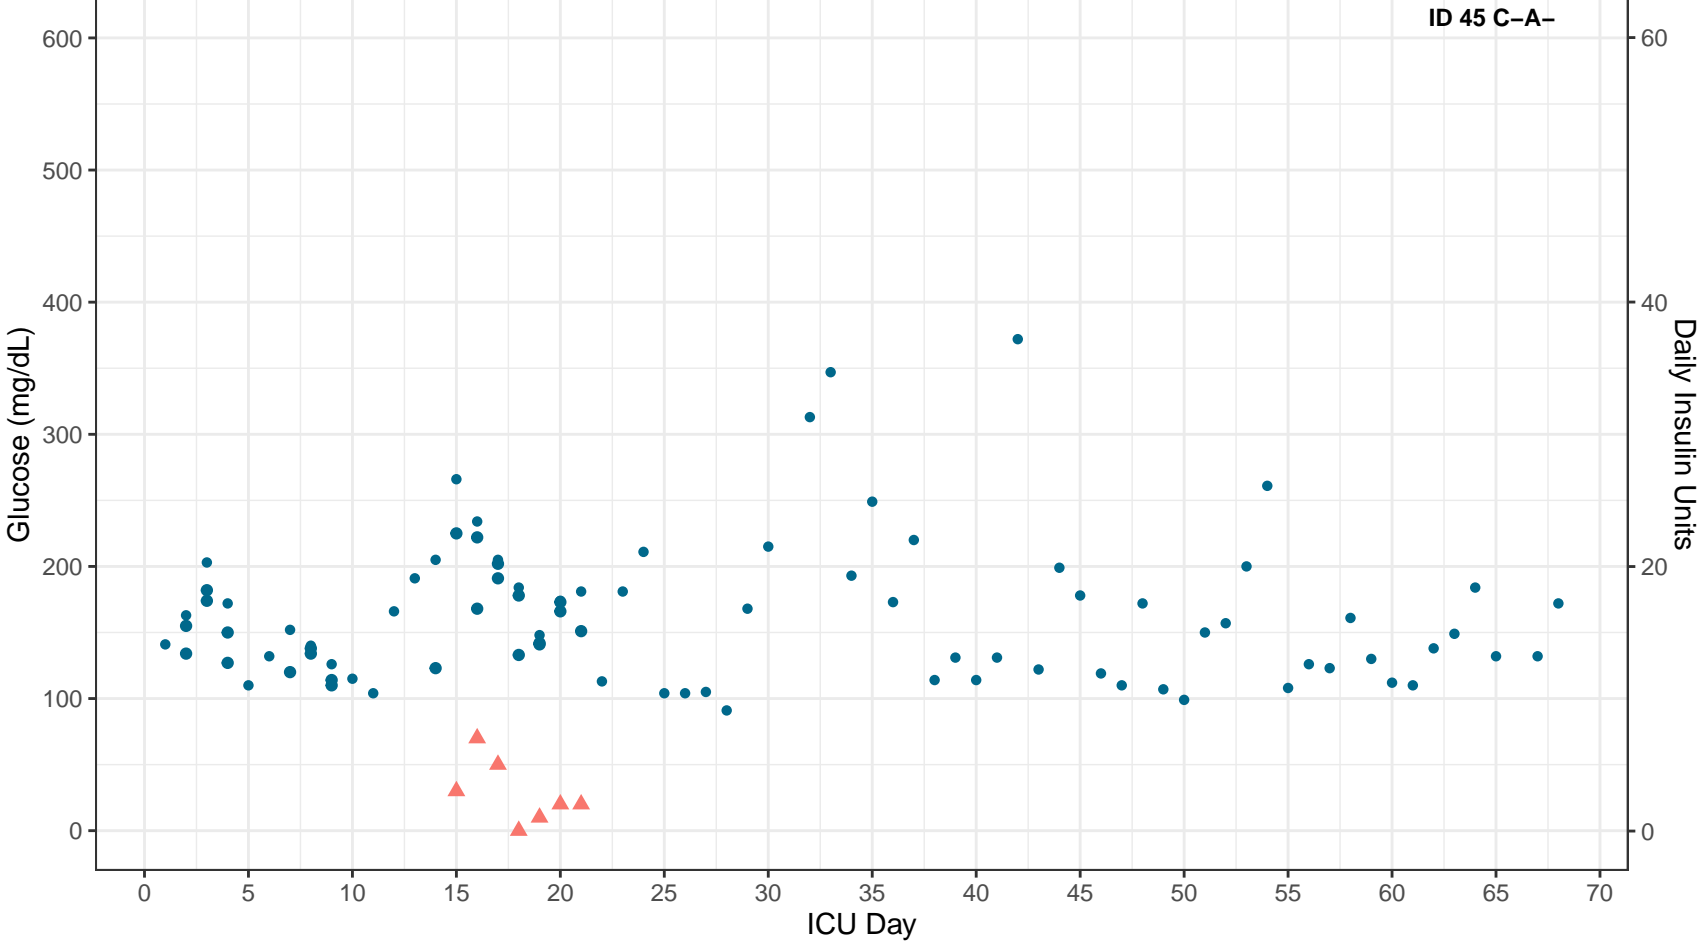

▲ Insulin      ● Glucose

ID 46 C+A+

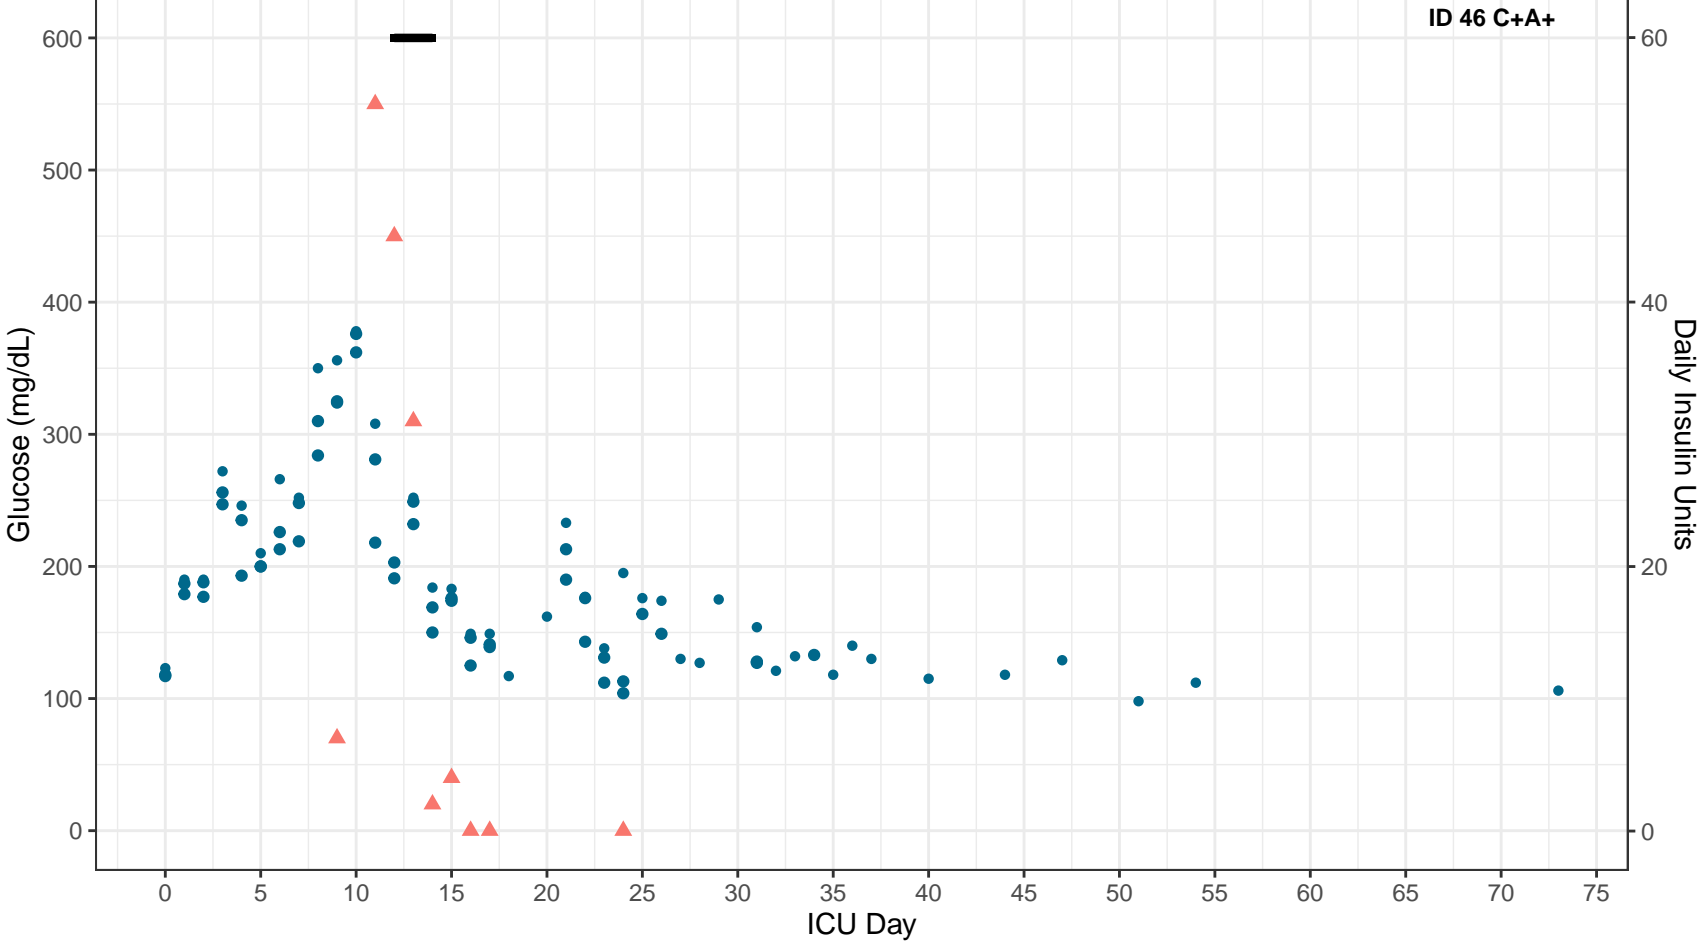

▲ Insulin      ● Glucose

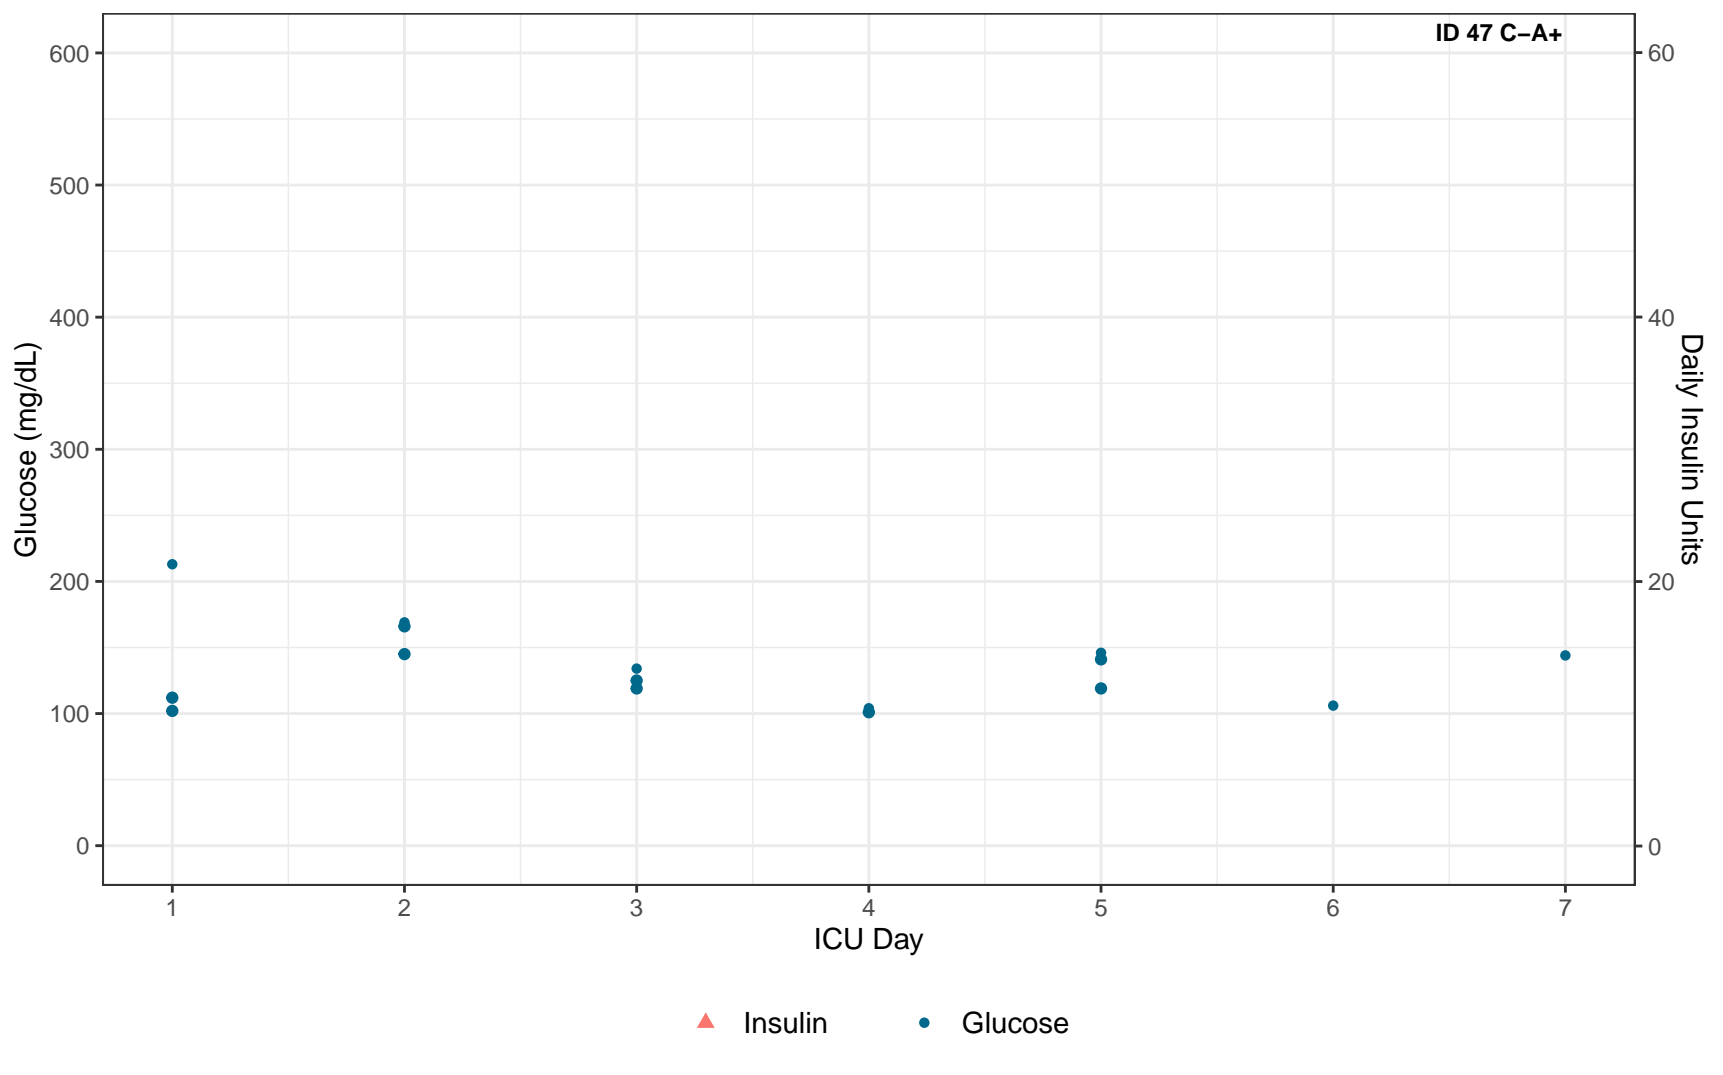

ID 48 C+A+

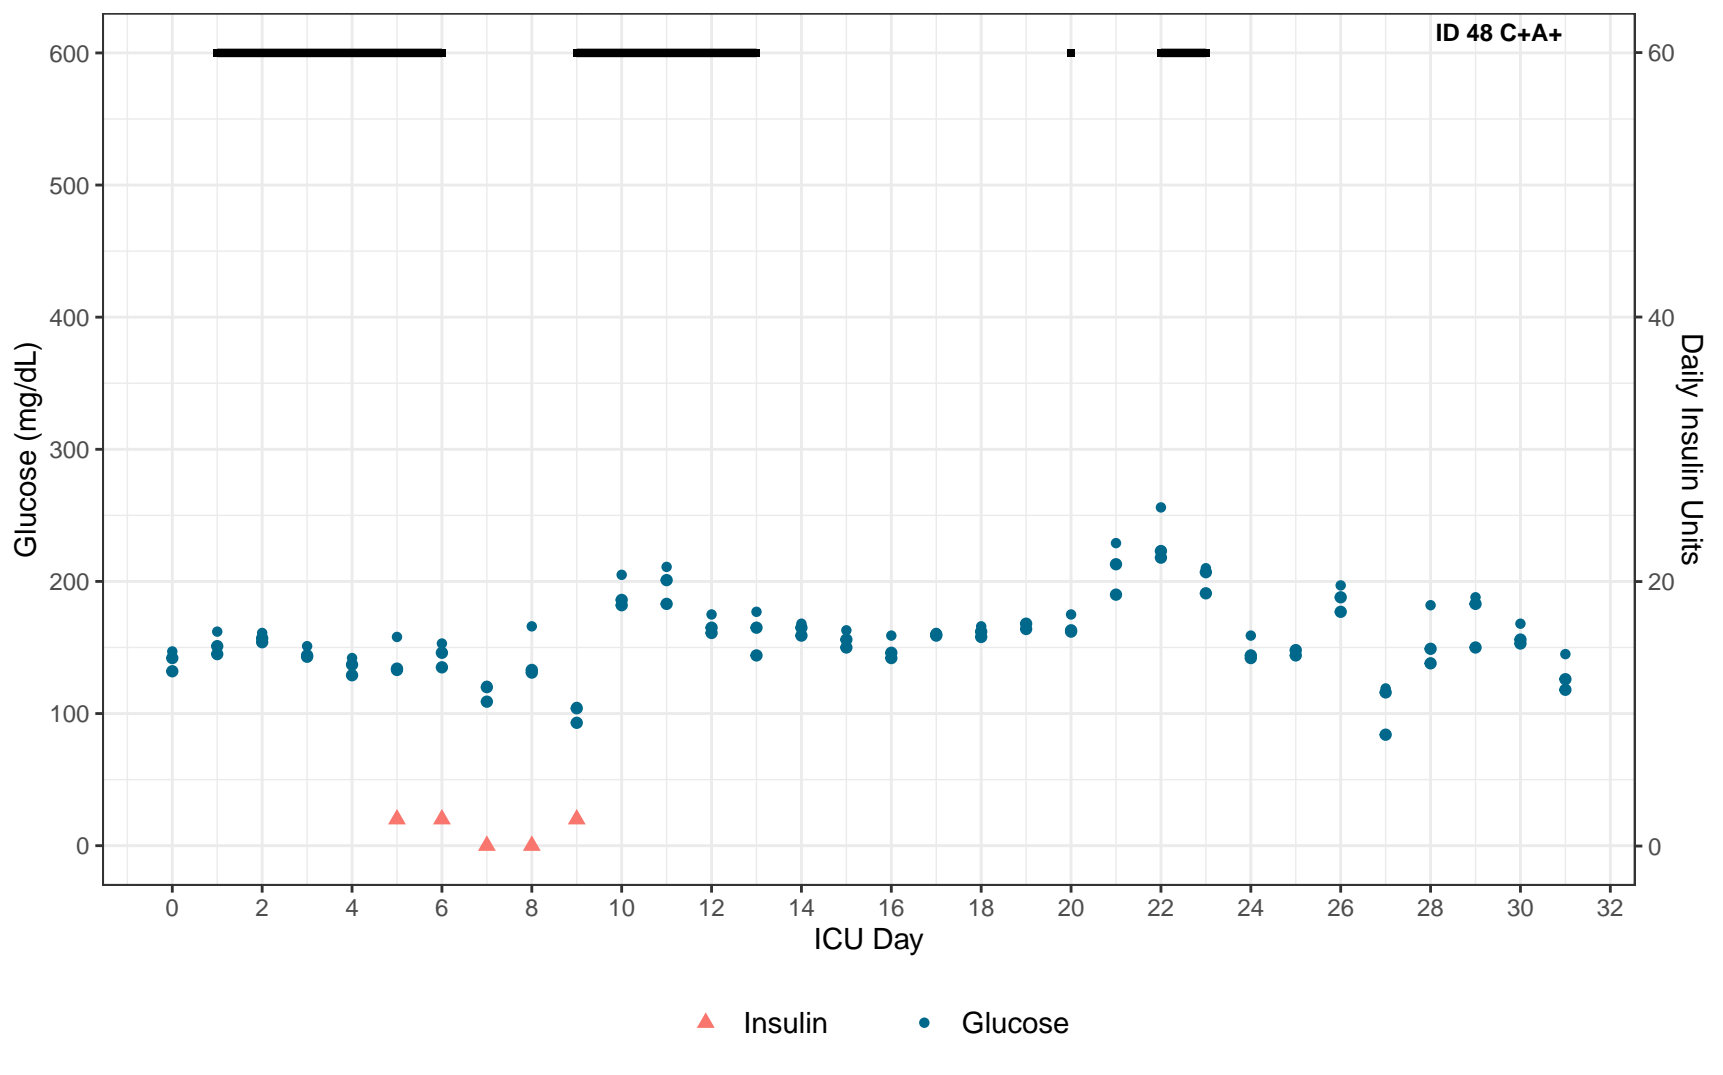

ID 49 C-A-

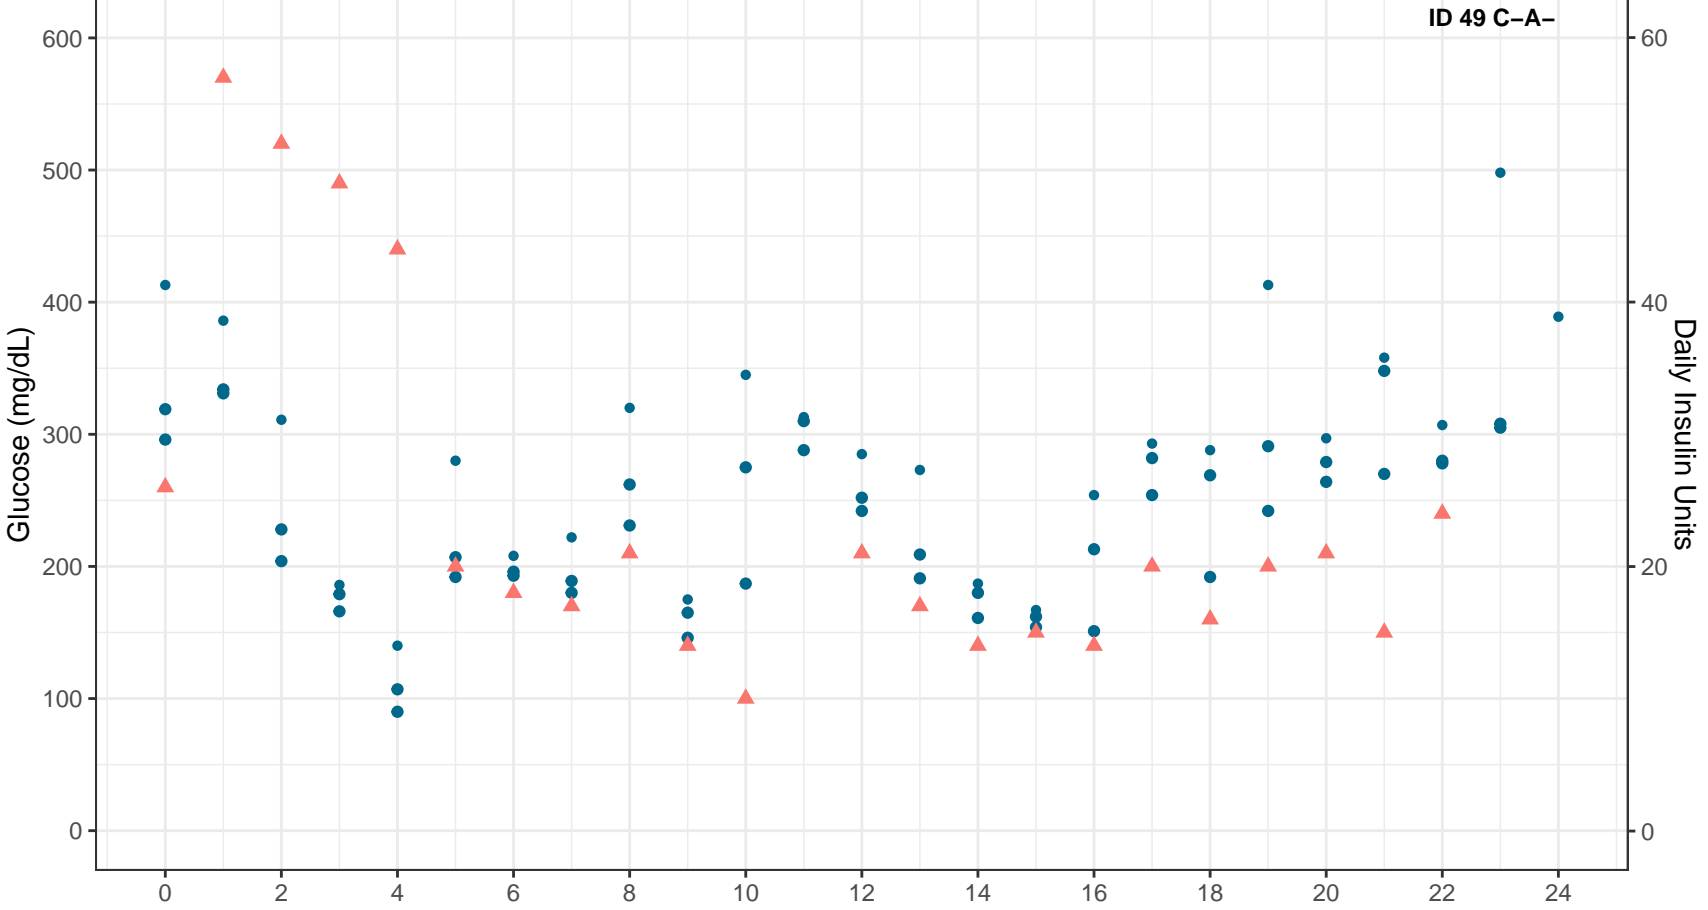

▲ Insulin      ● Glucose



ID 51 C+A+

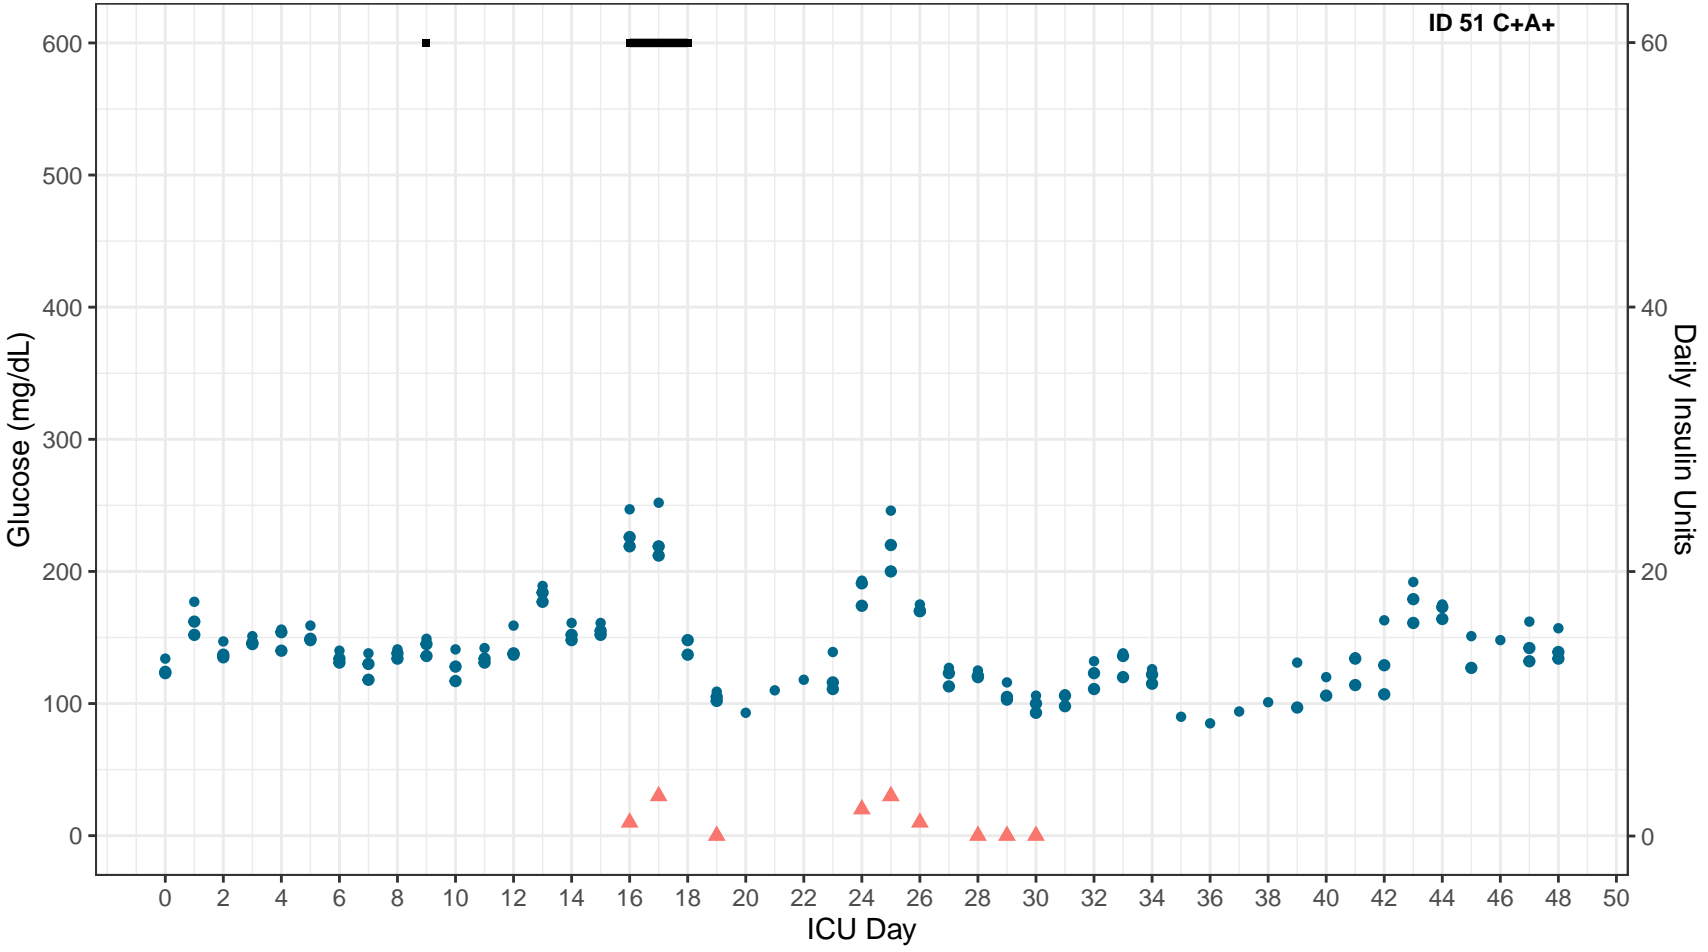

▲ Insulin      ● Glucose

ID 52 C-A-

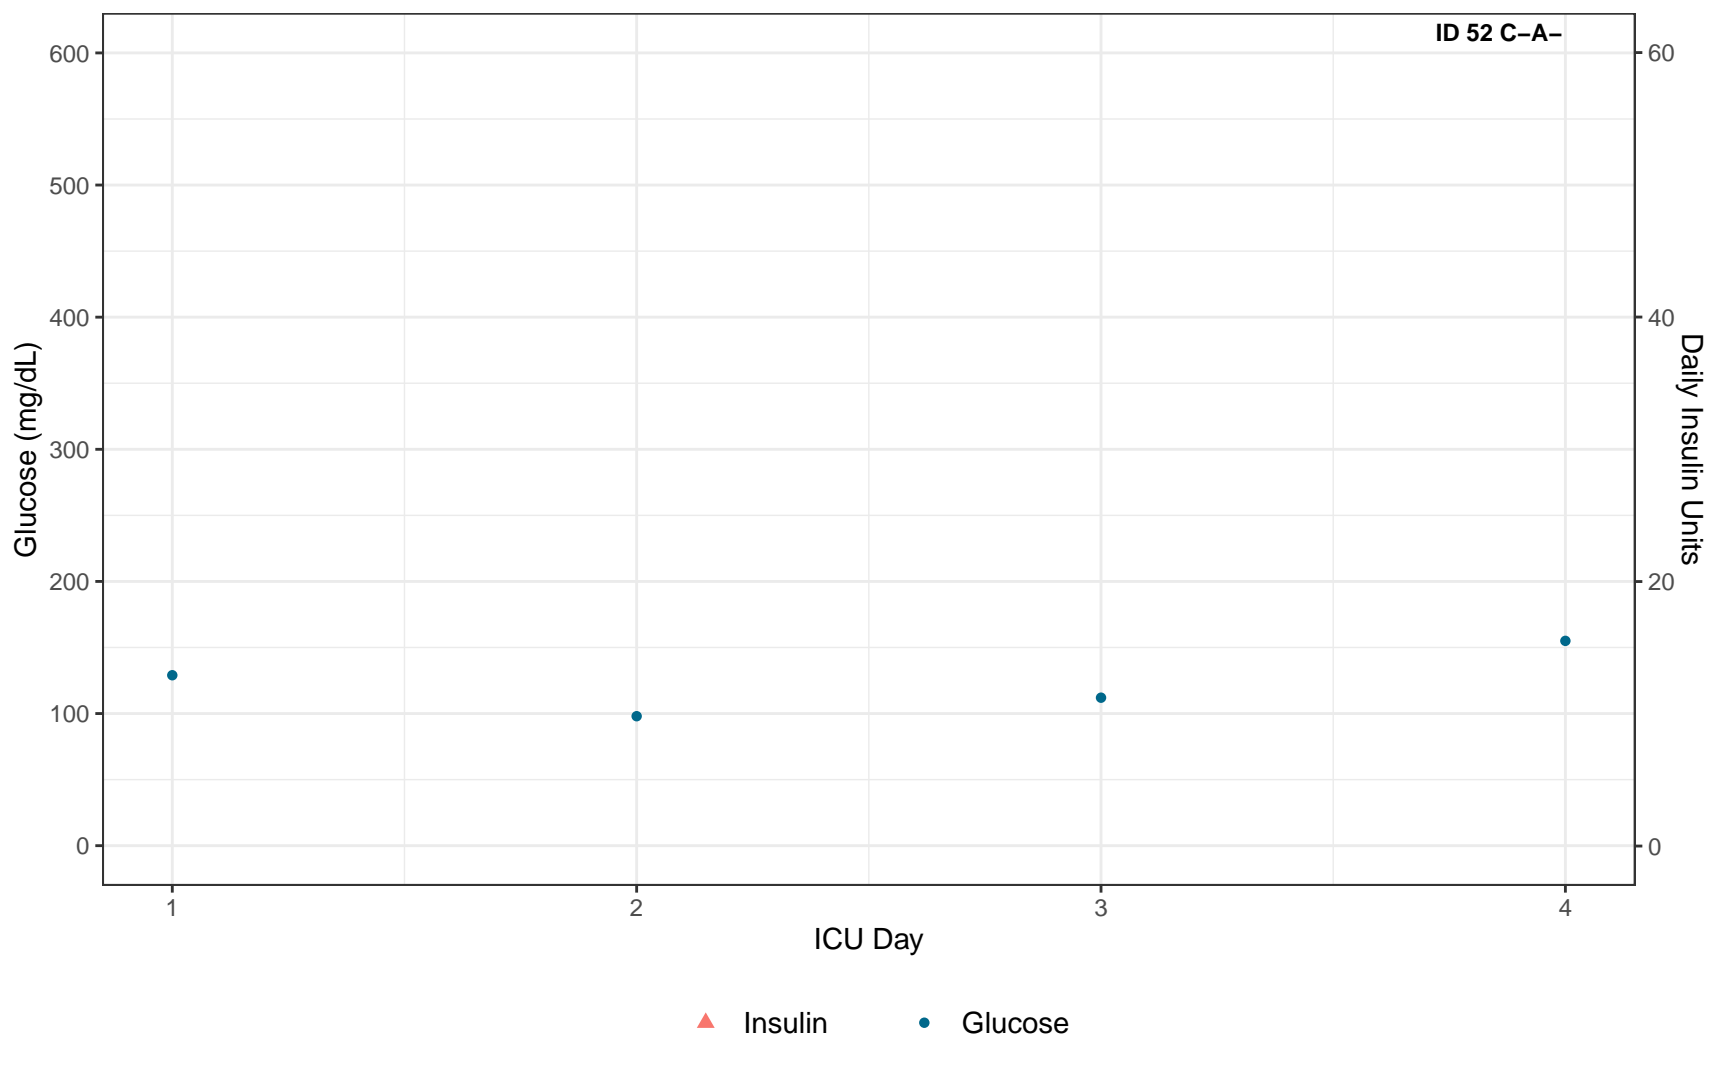

ID 53 C-A-

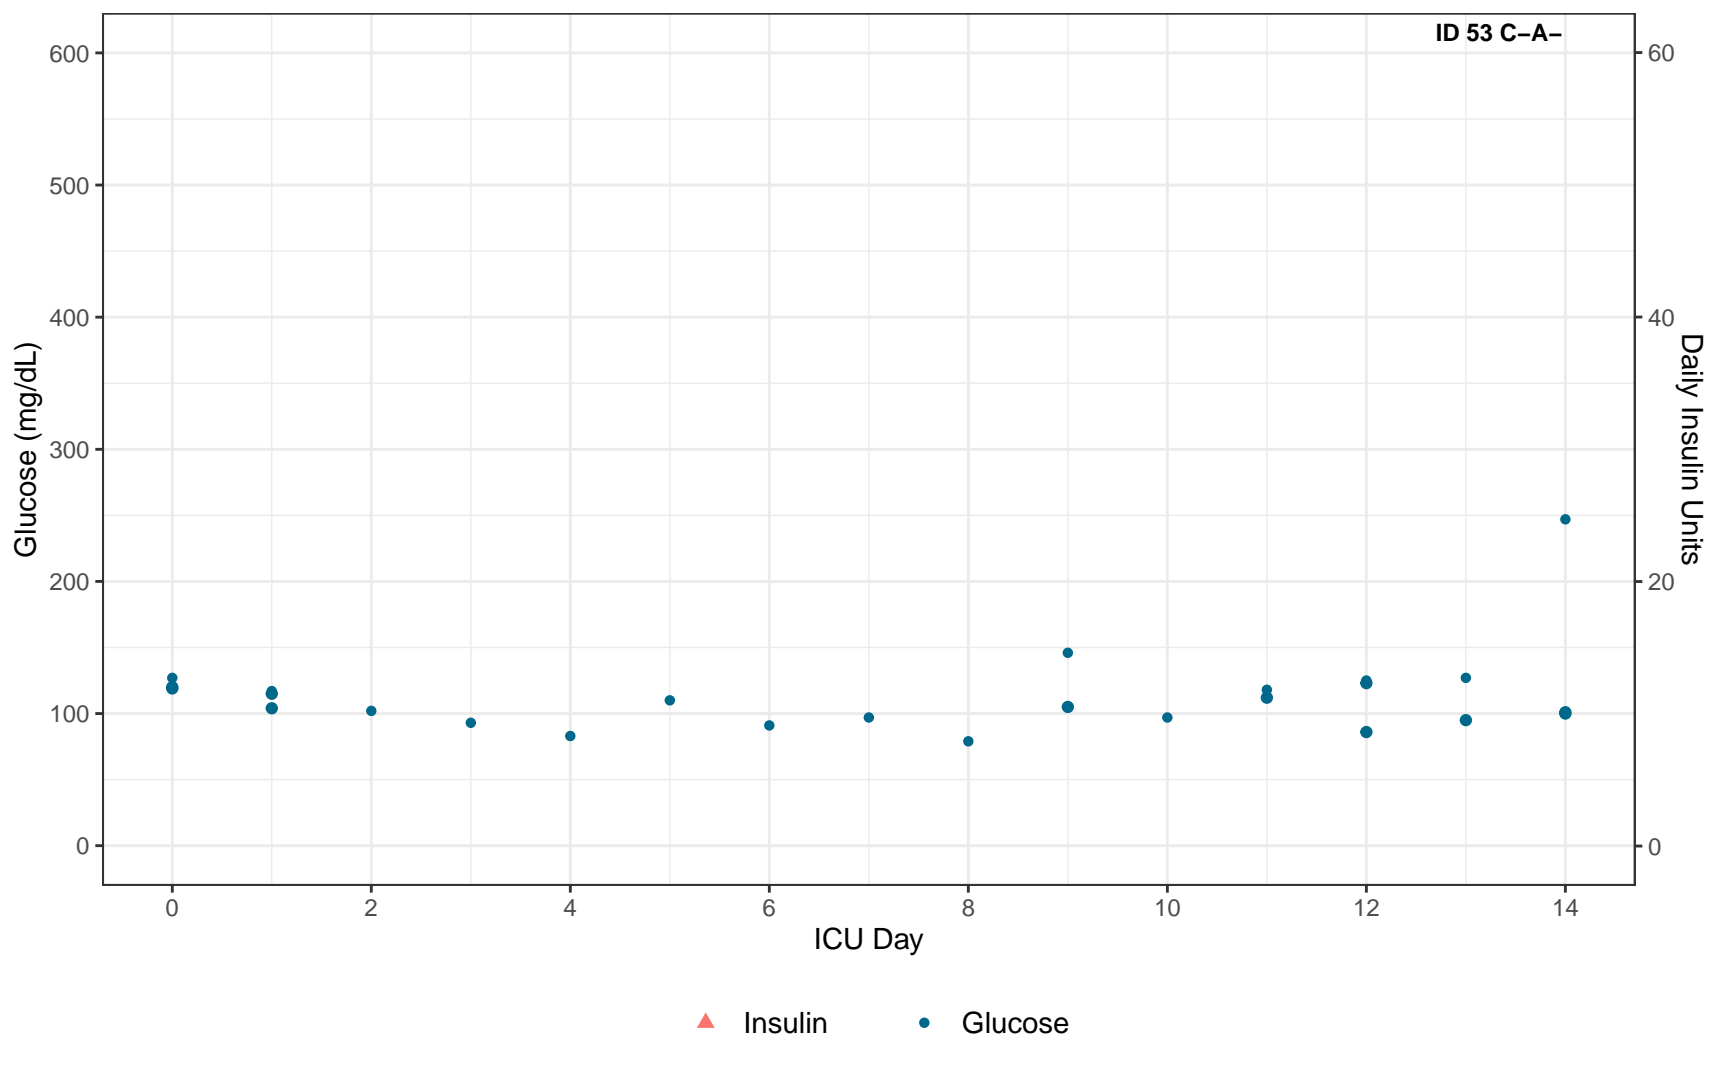

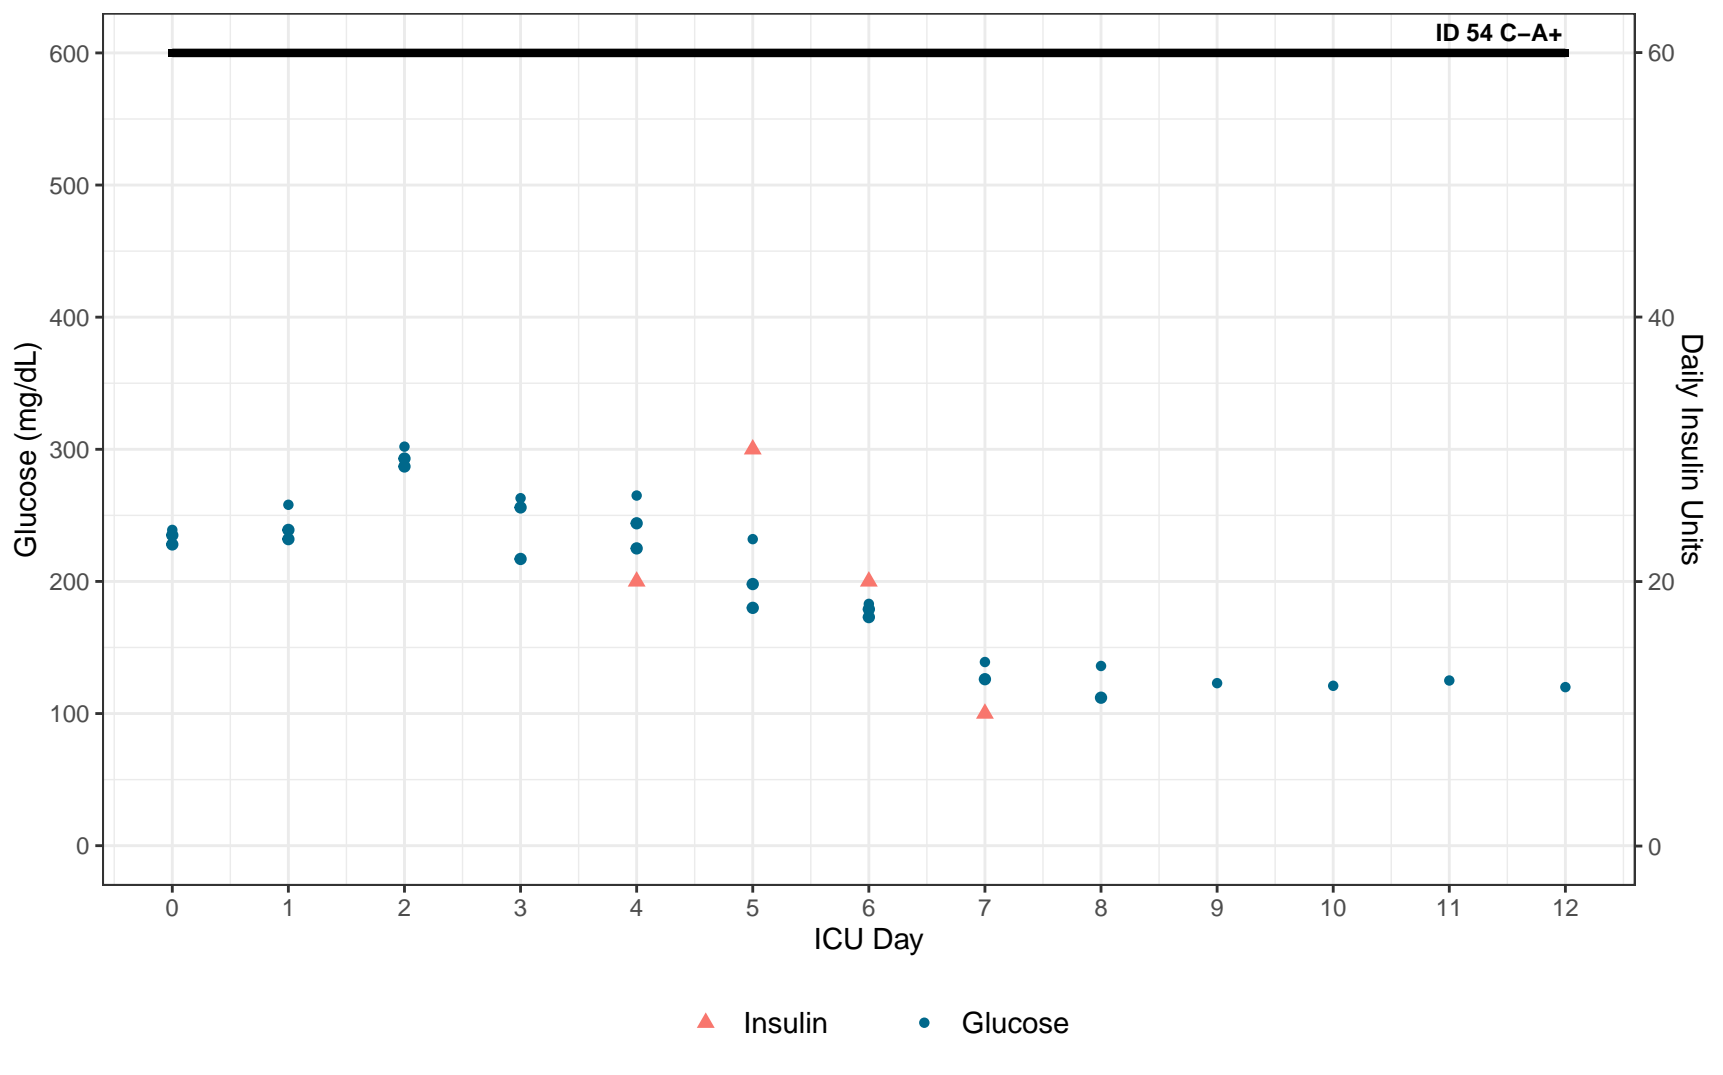

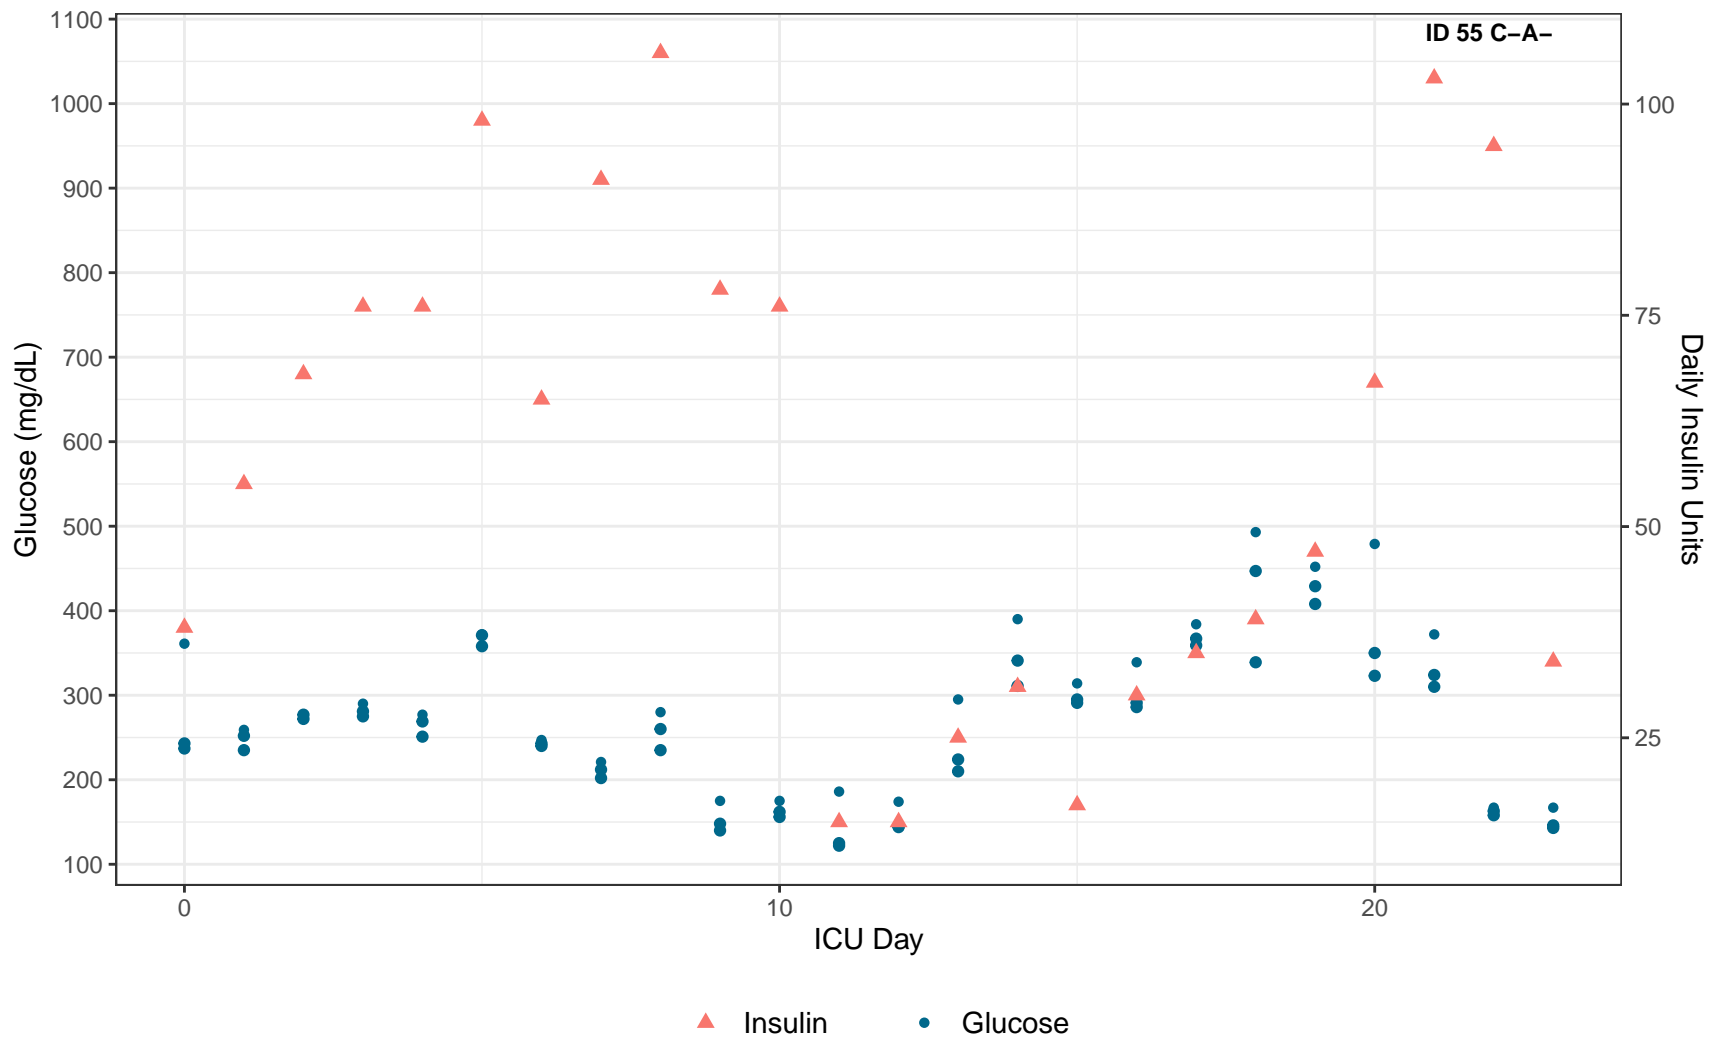

ID 56 C-A-

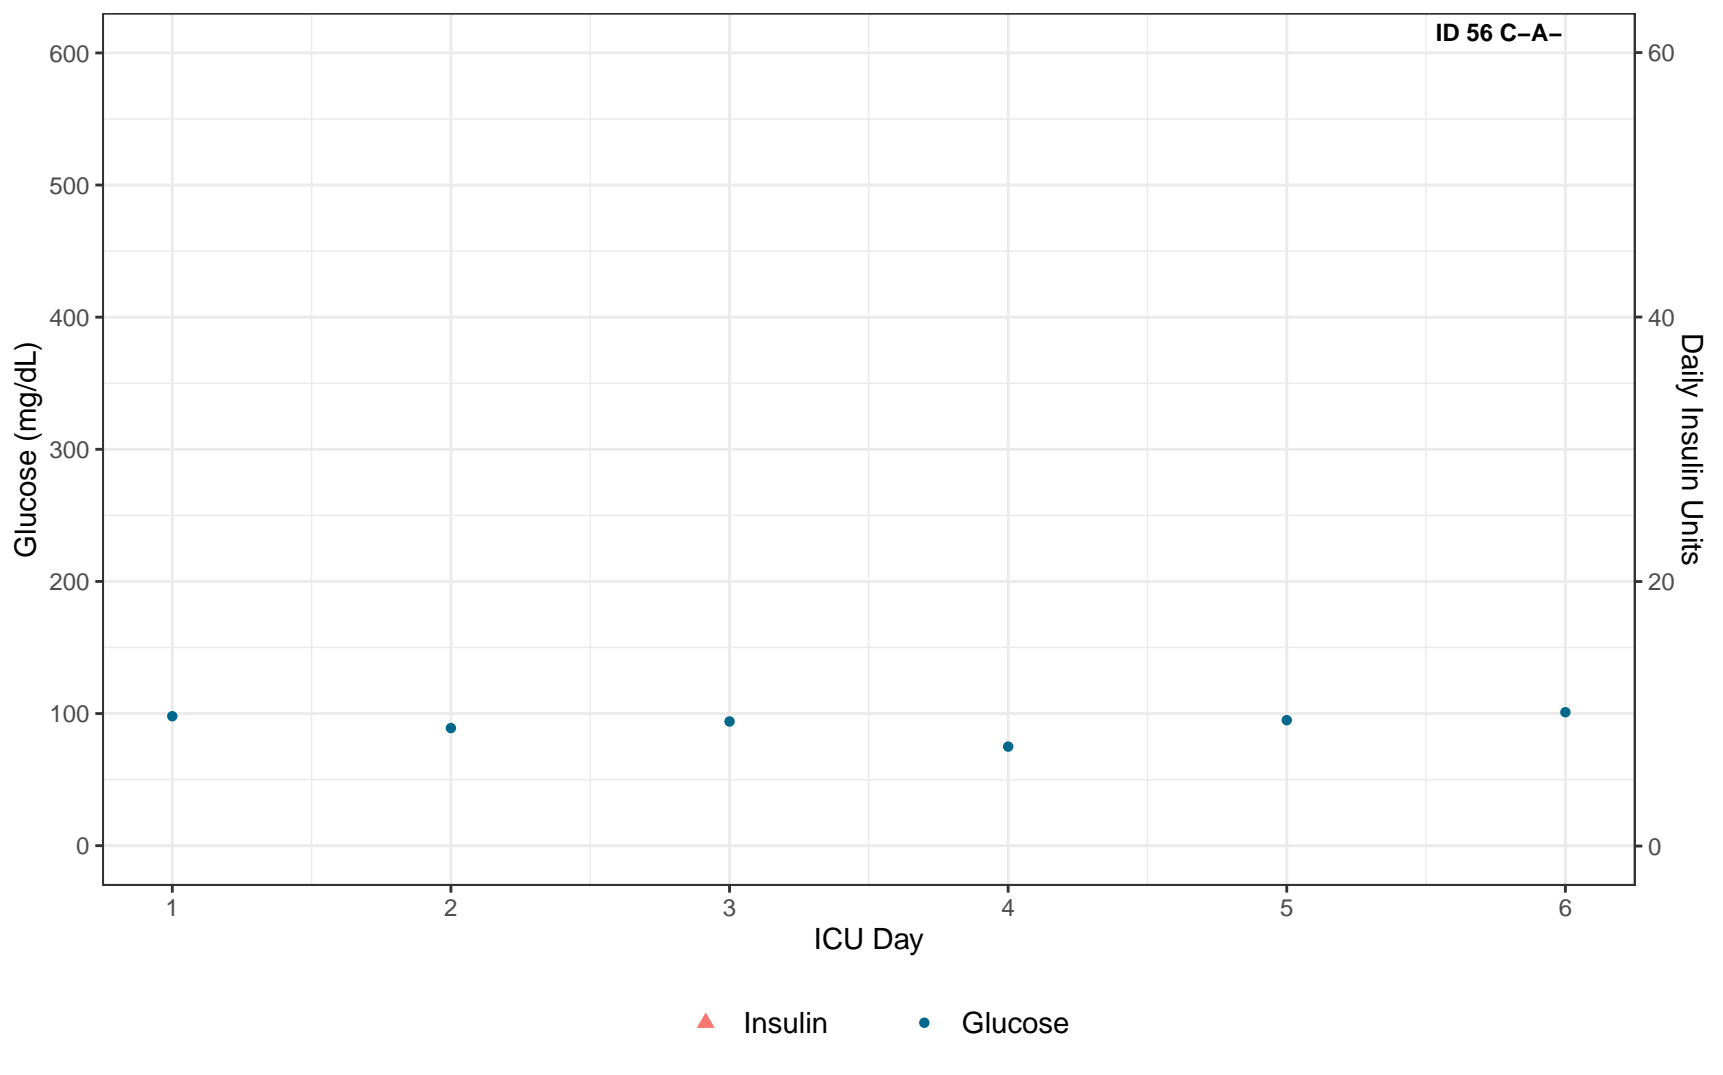

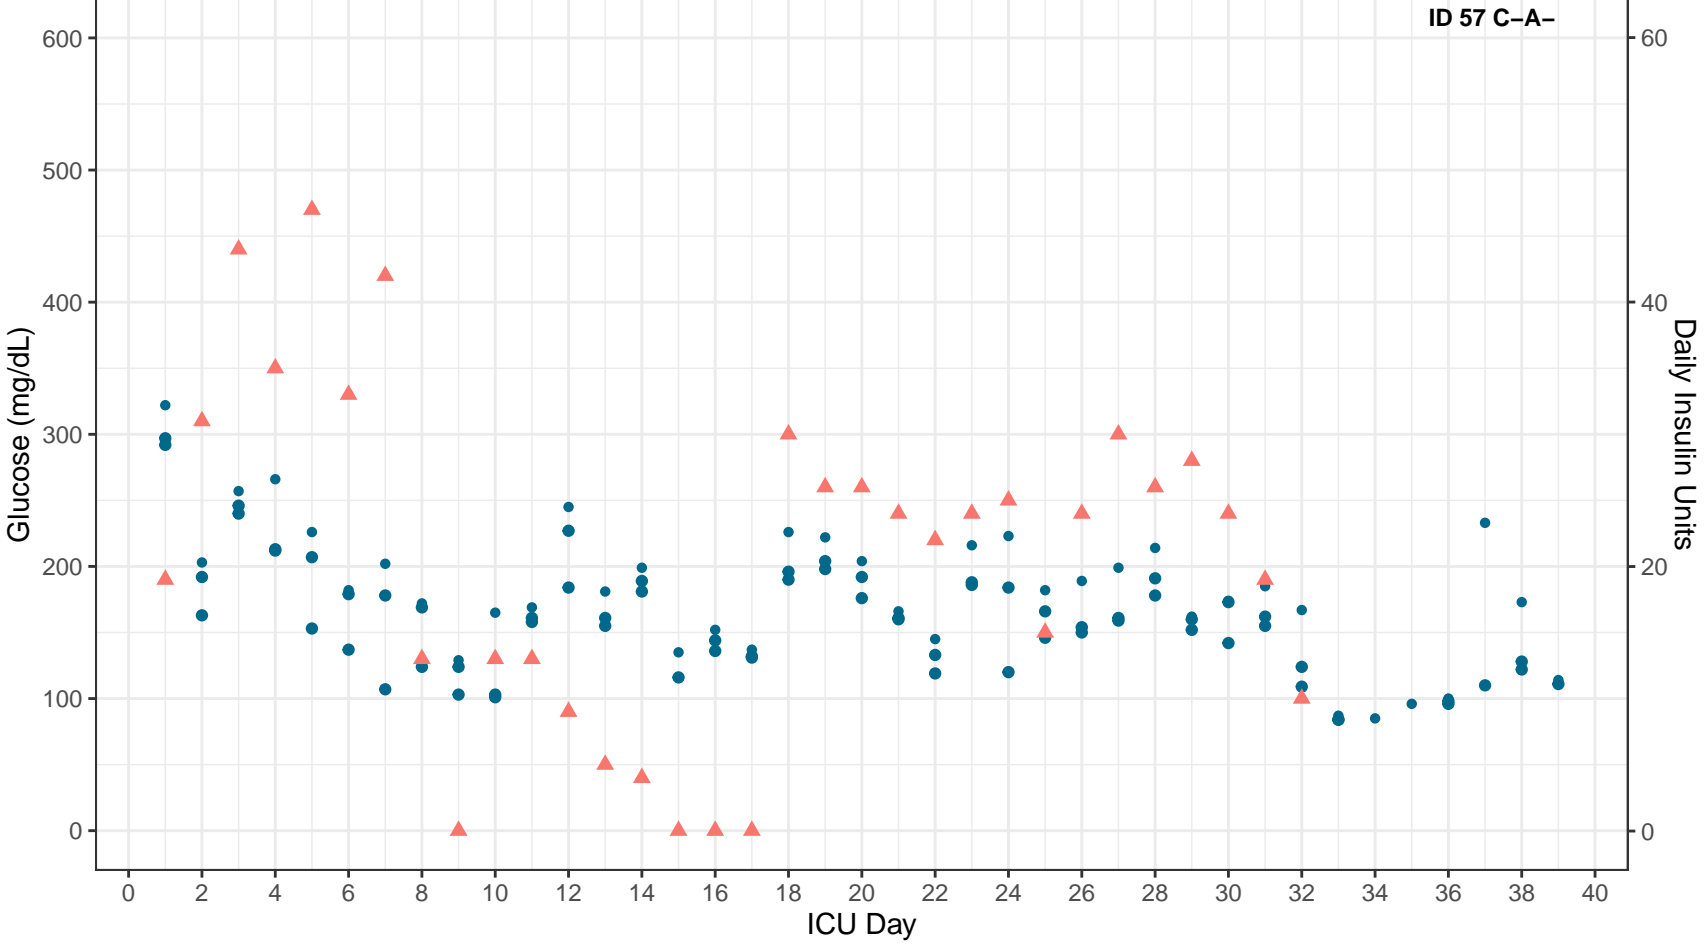

▲ Insulin      ● Glucose

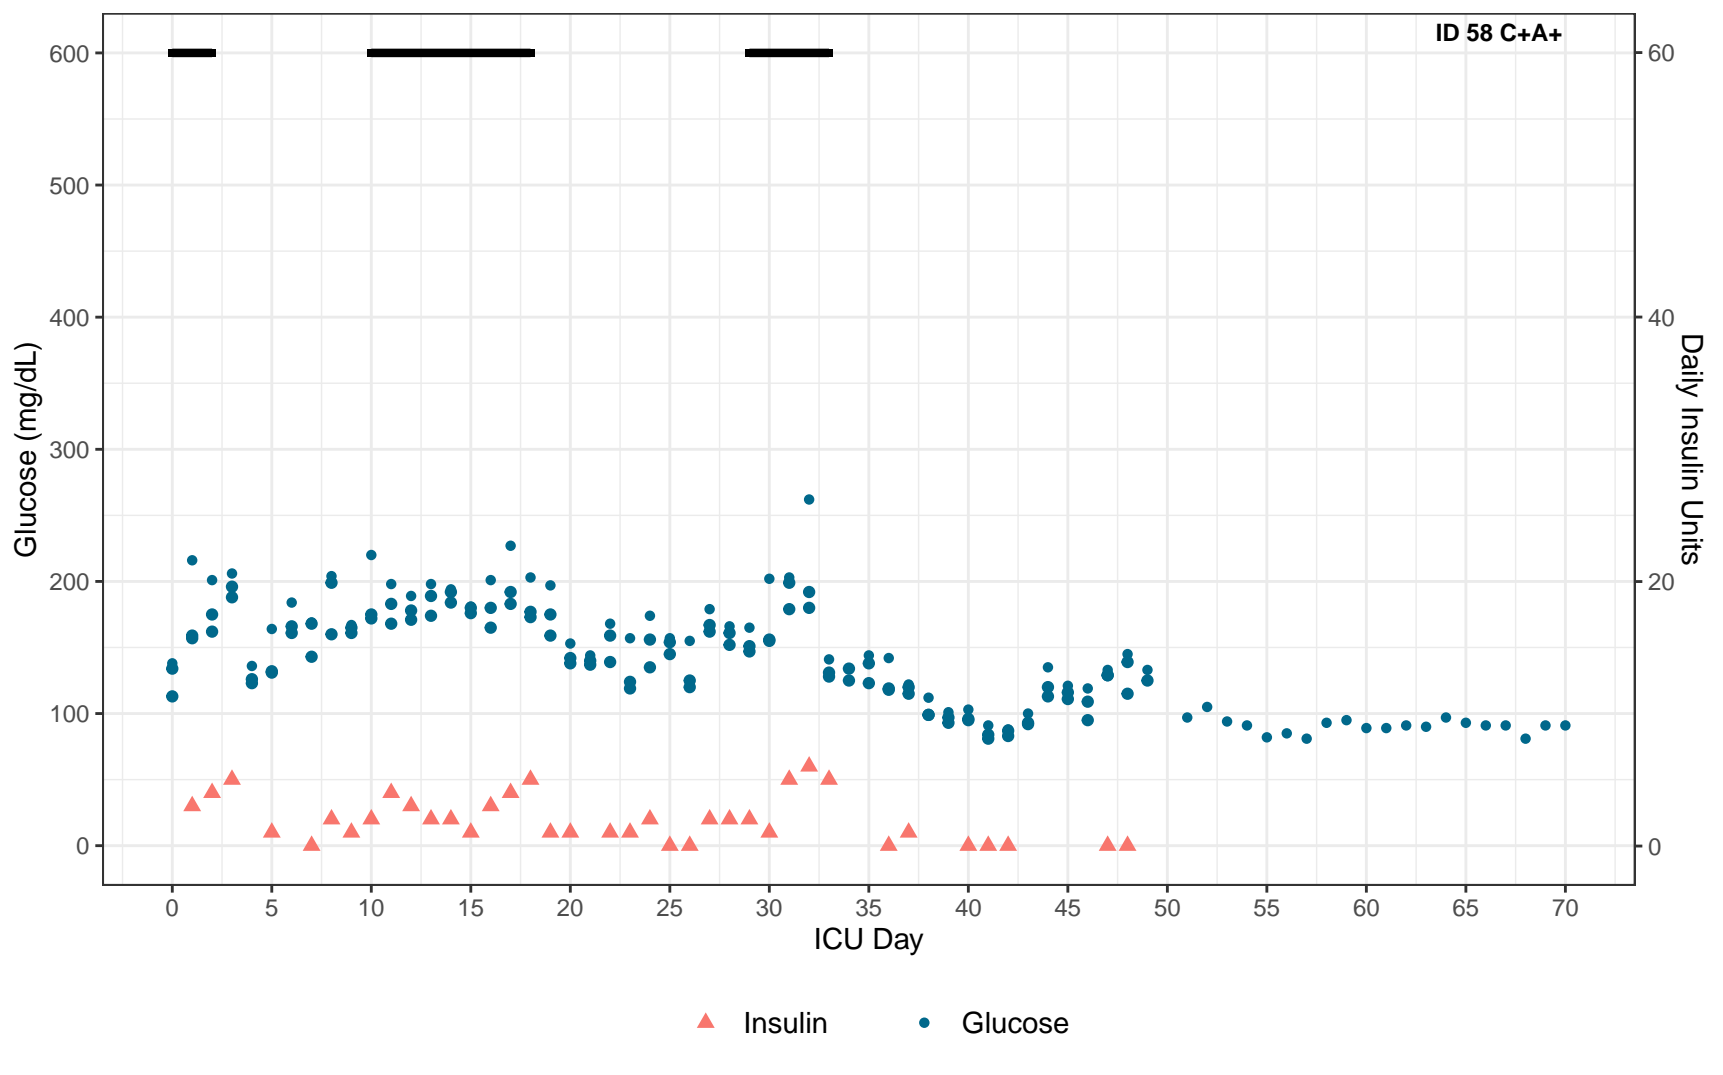



ID 59 C-A-

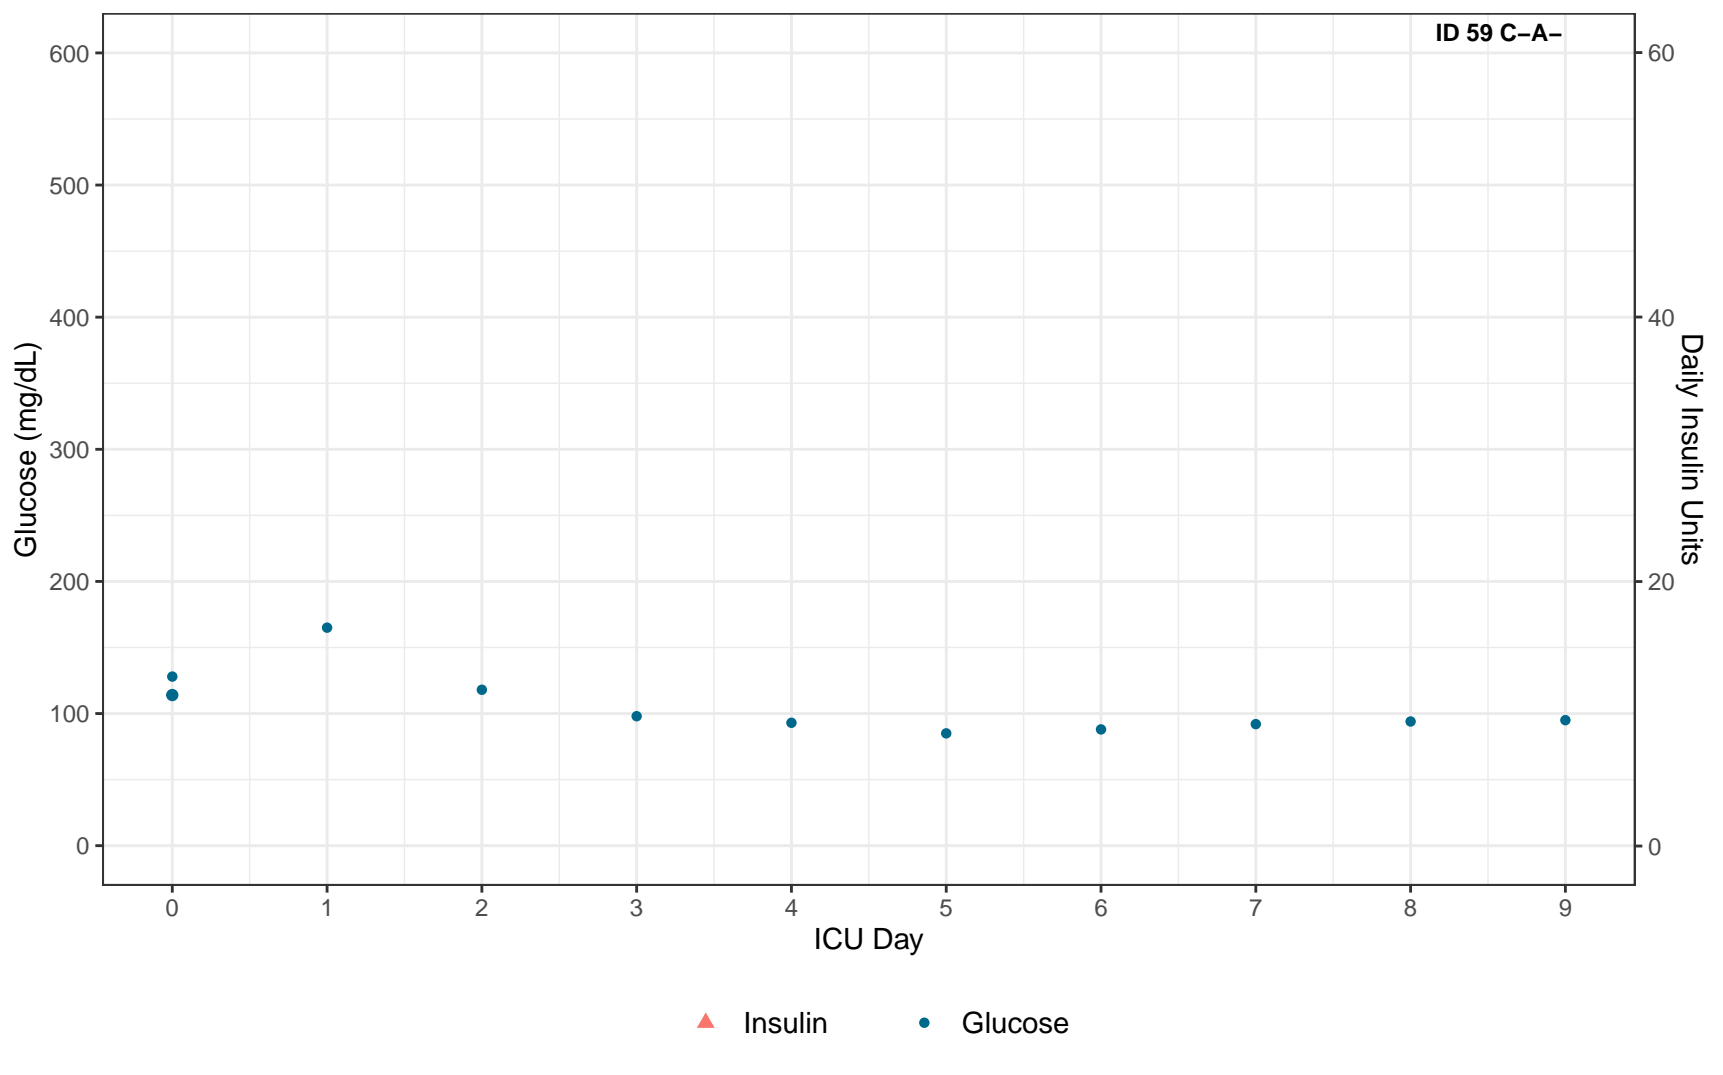

ID 60 C-A-

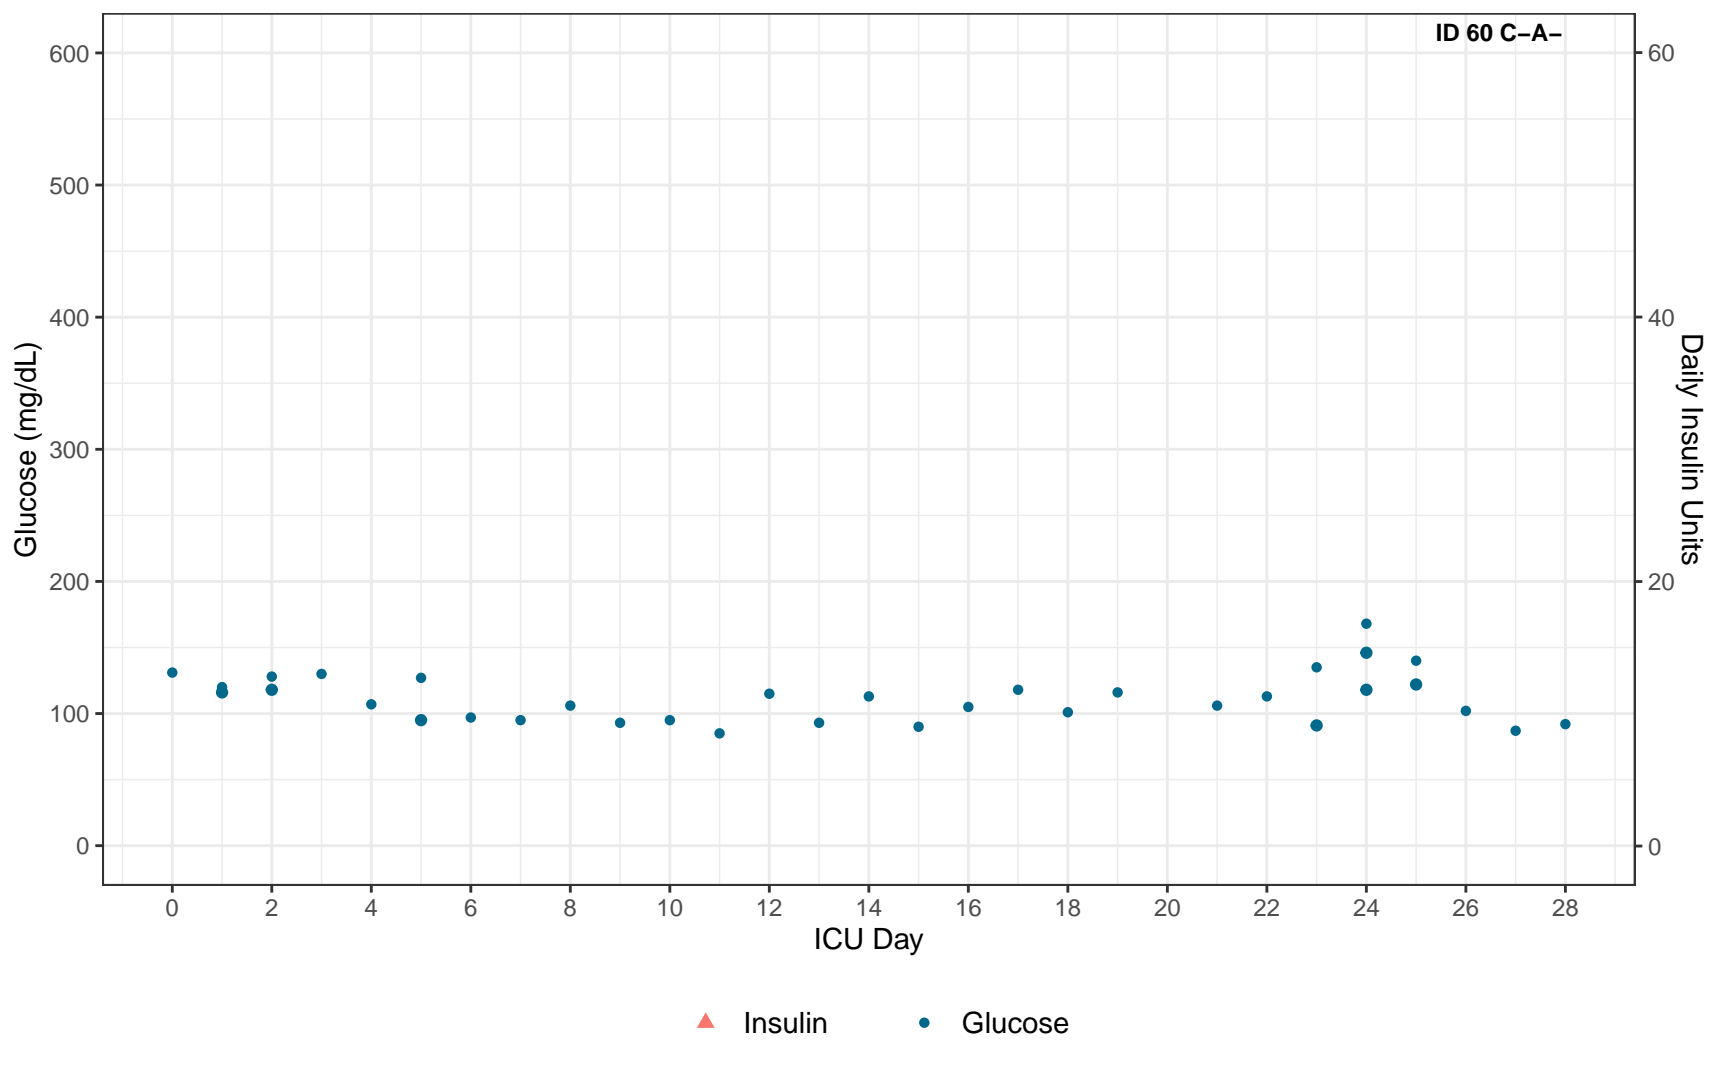

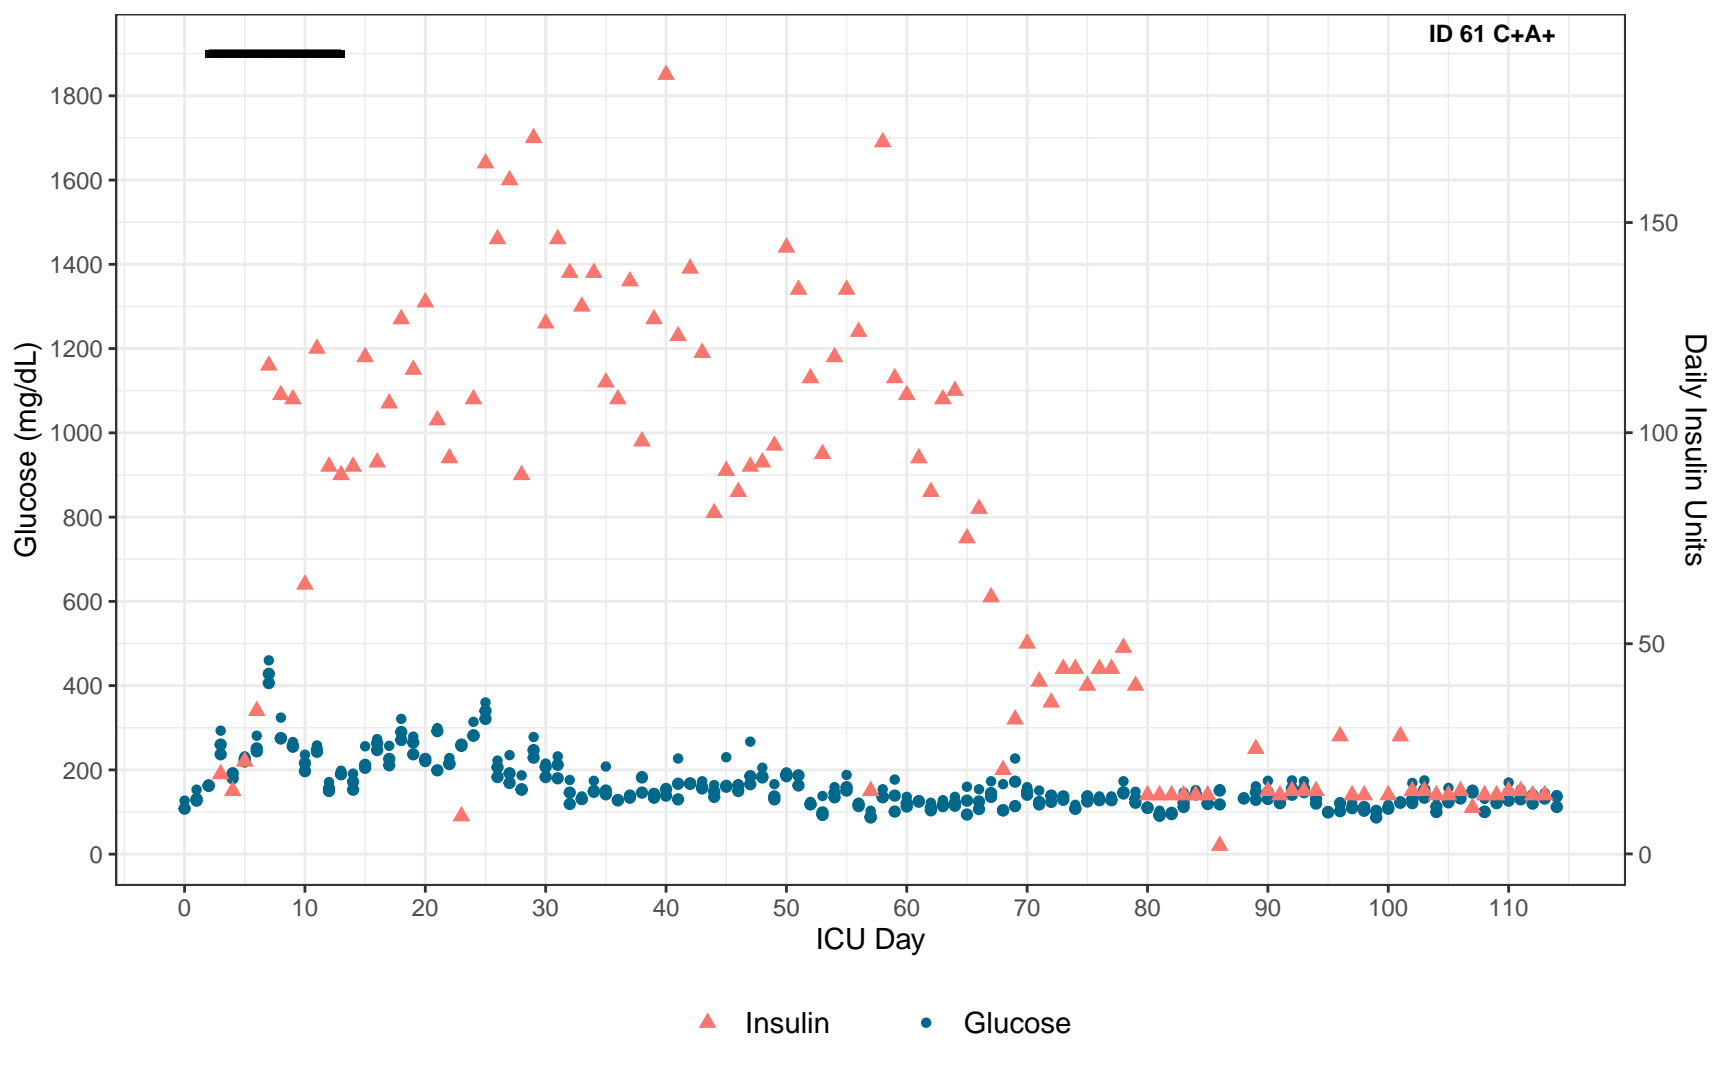

ID 62 C-A+

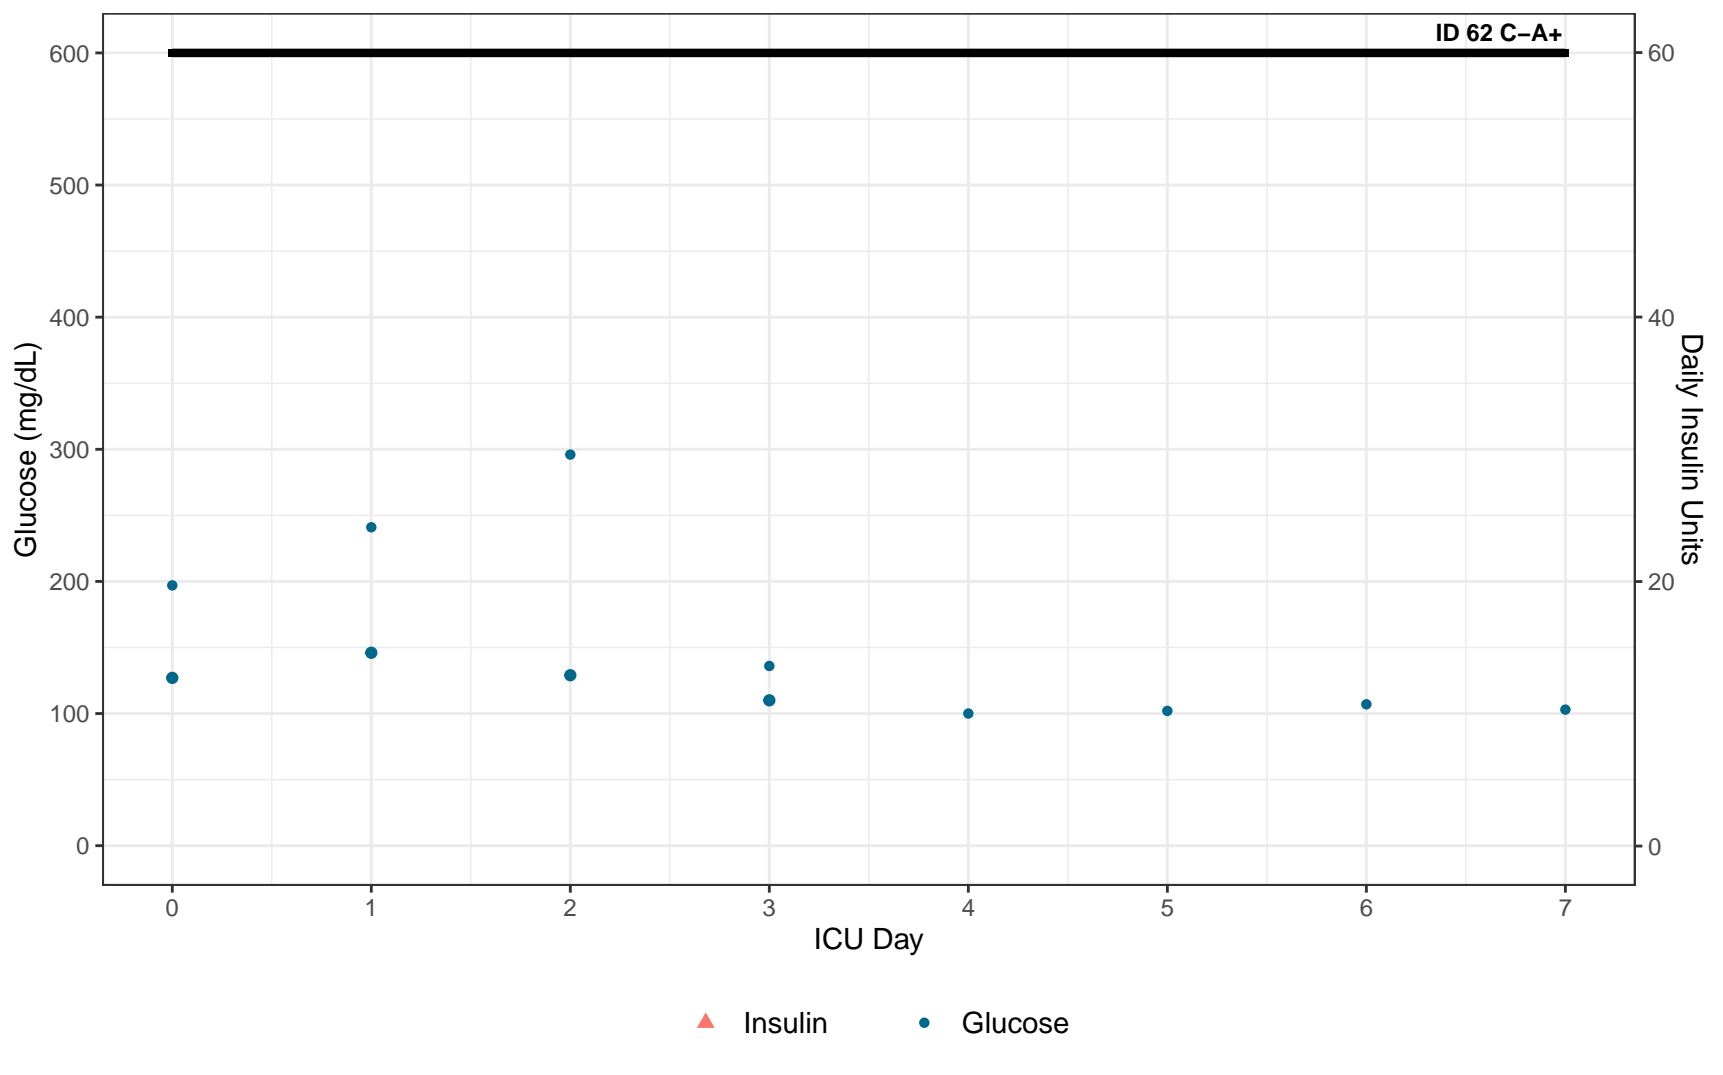

Glucose (mg/dL)

Daily Insulin Units

ICU Day

▲ Insulin      ● Glucose

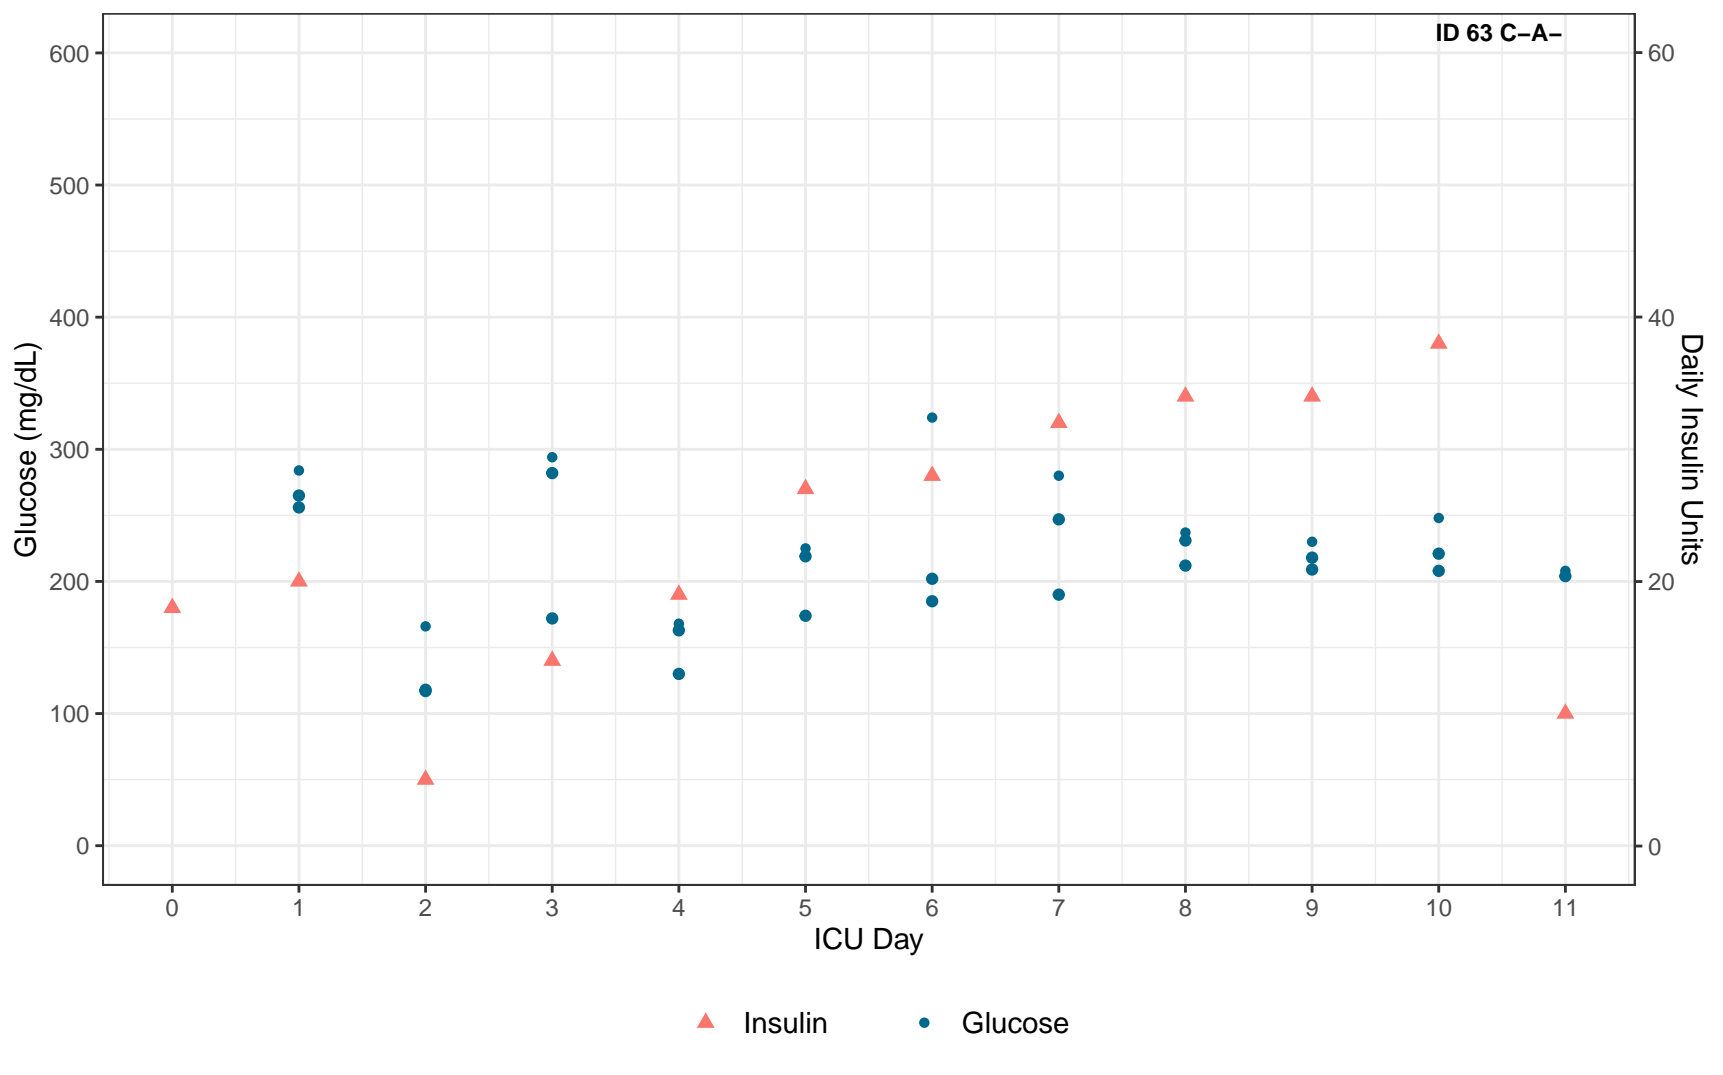

ID 64 C-A-

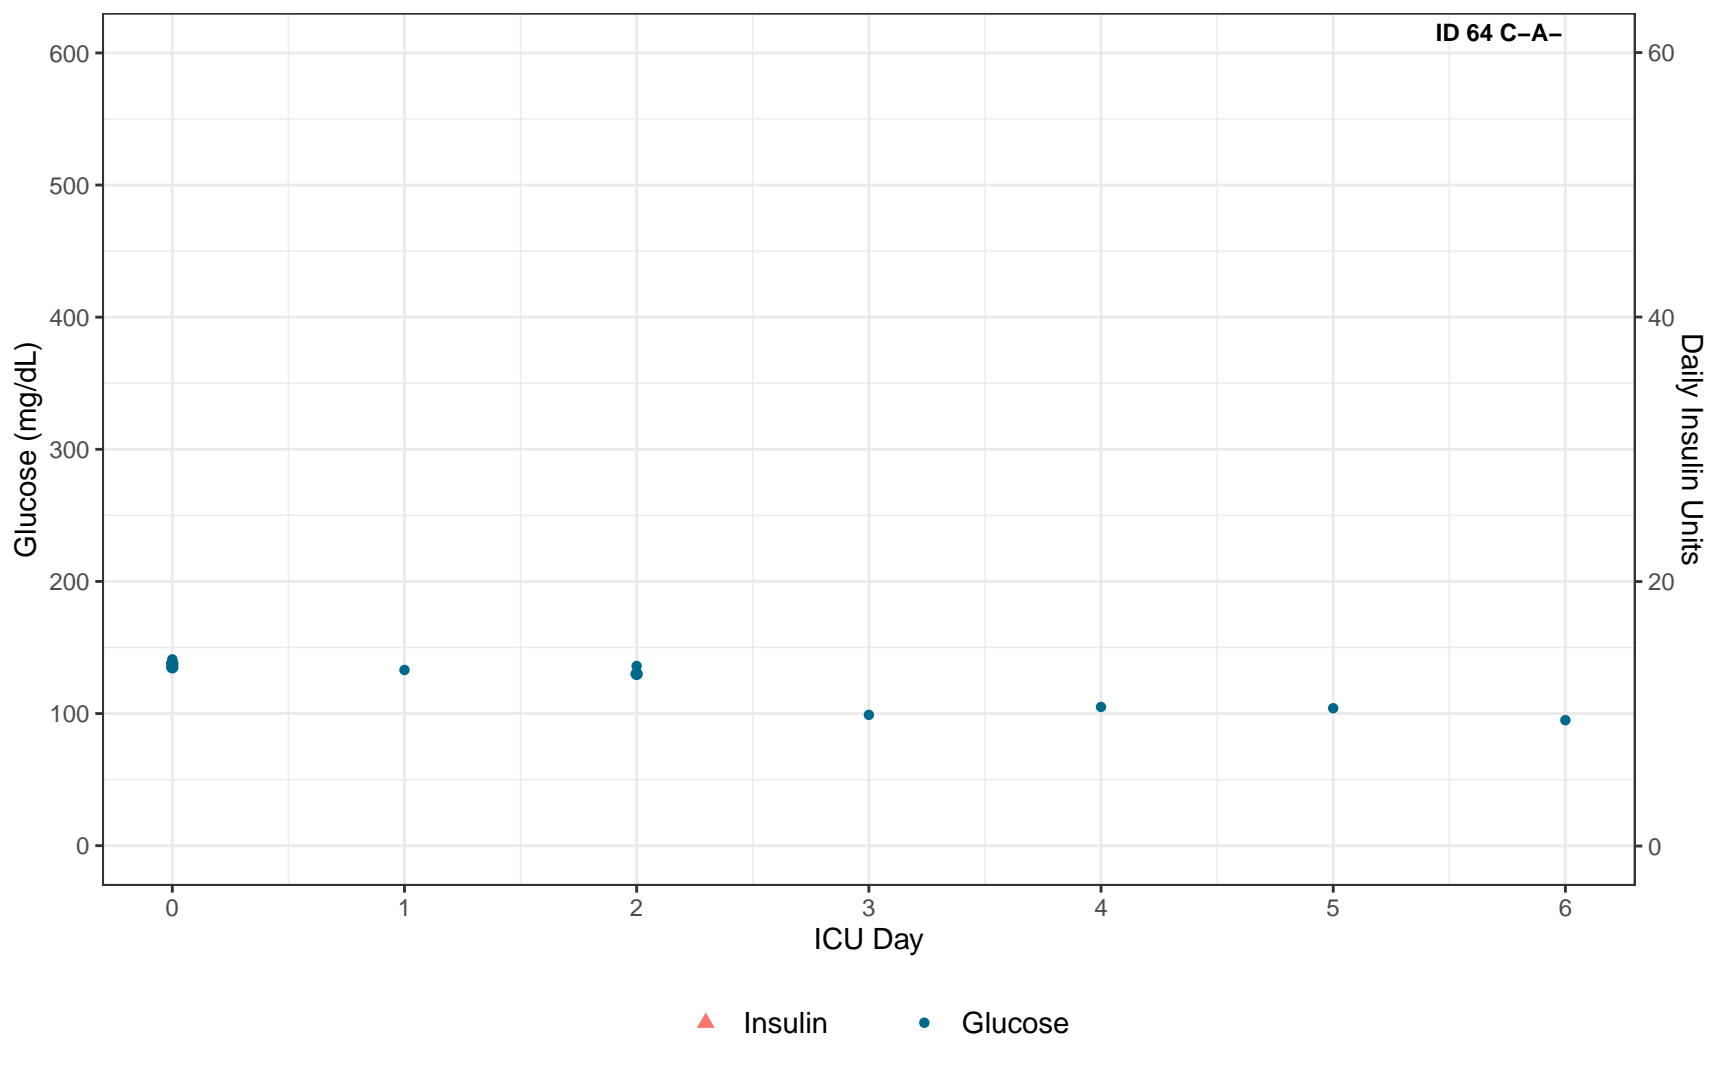

ID 65 C-A-

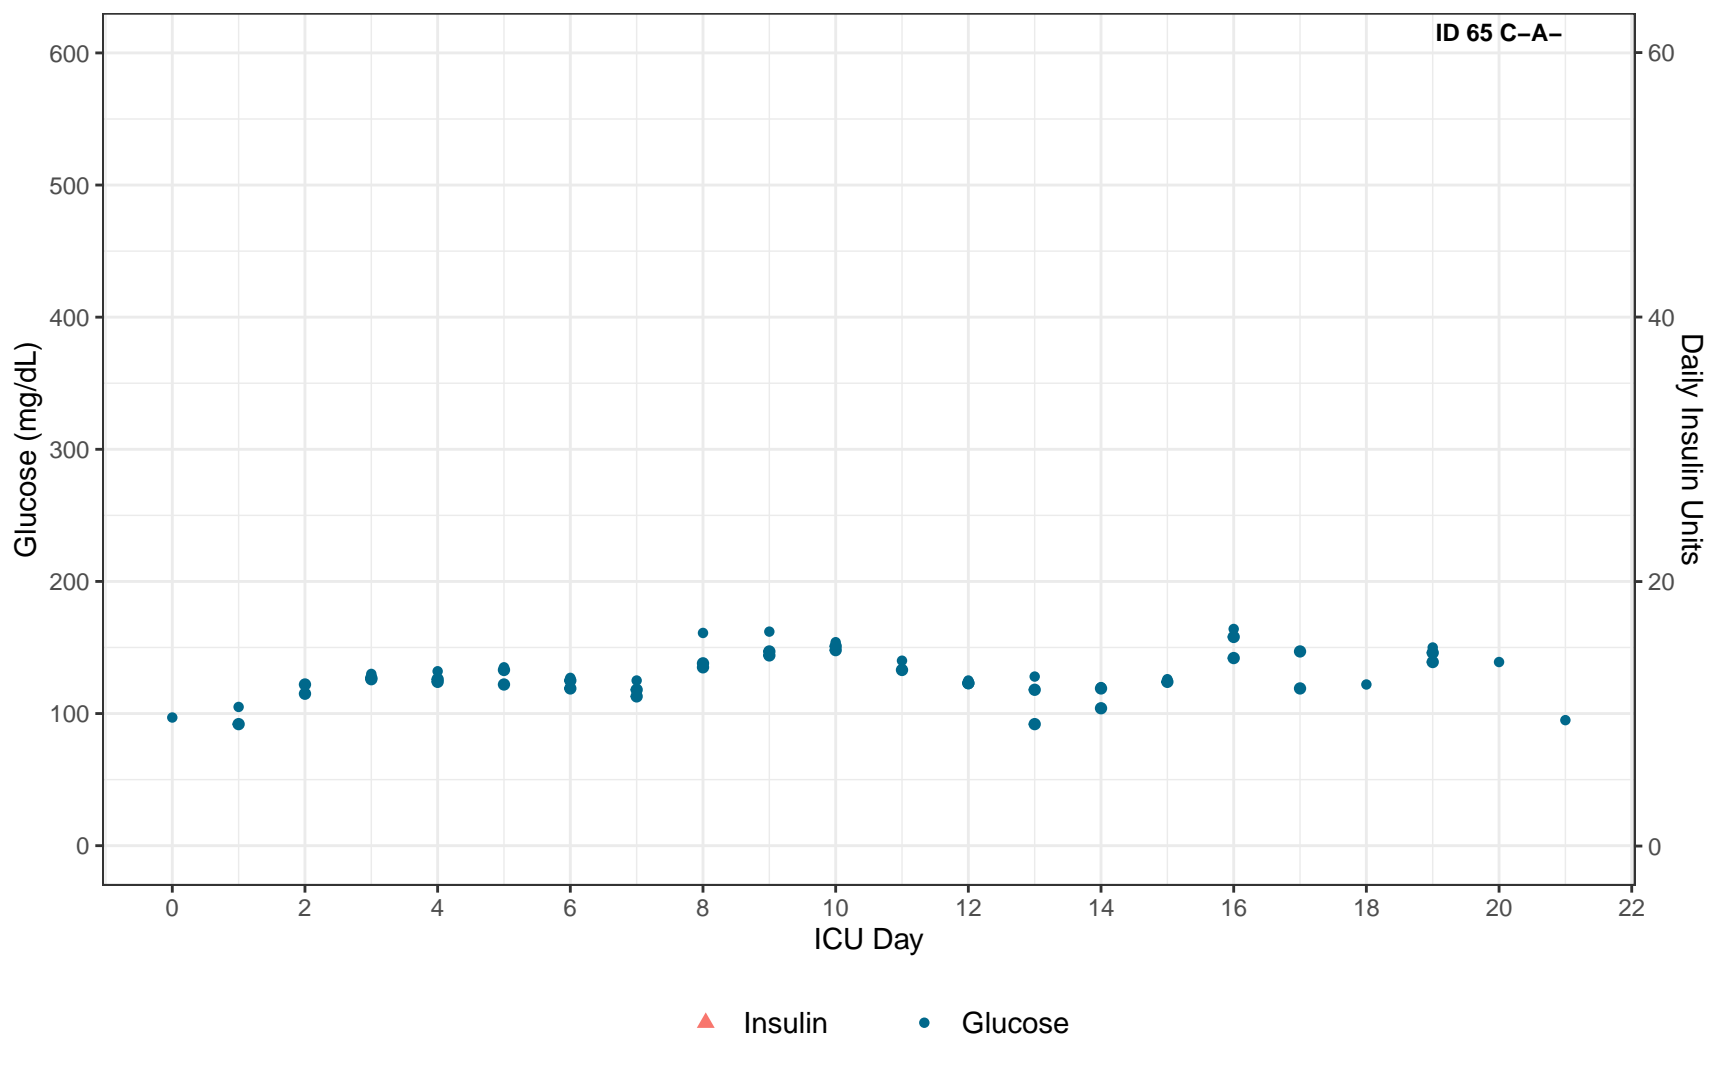

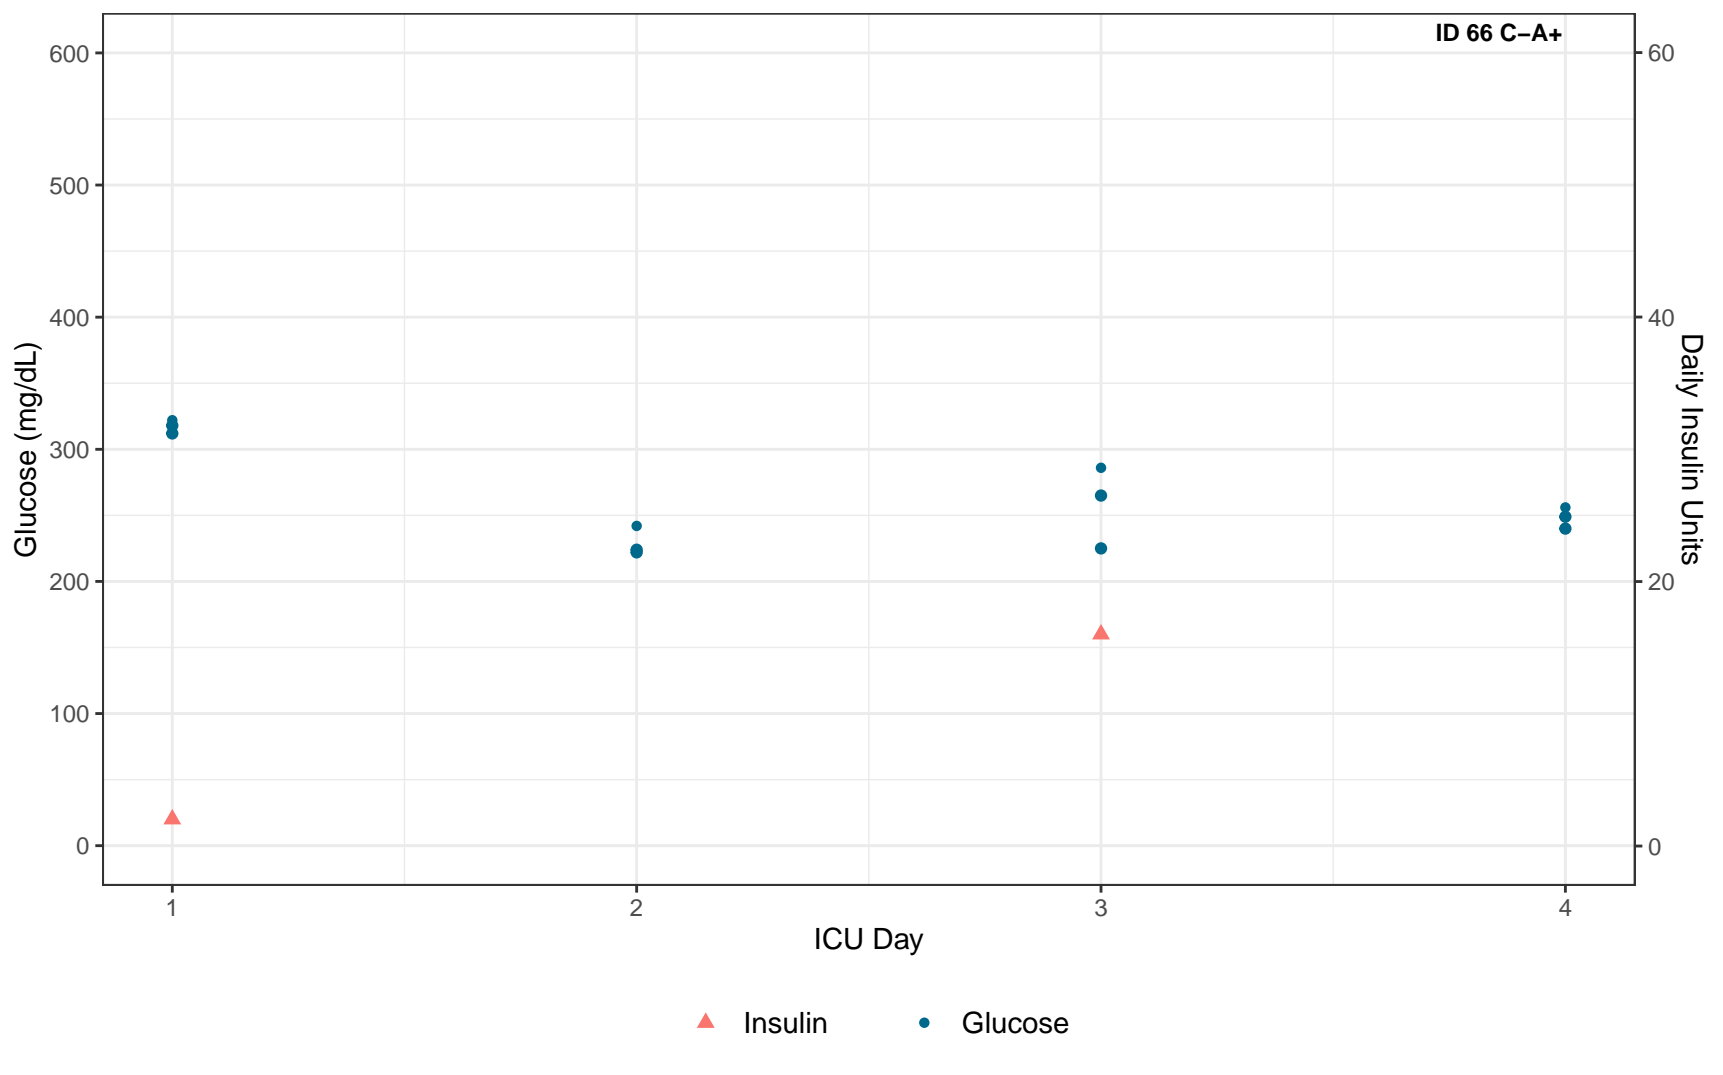



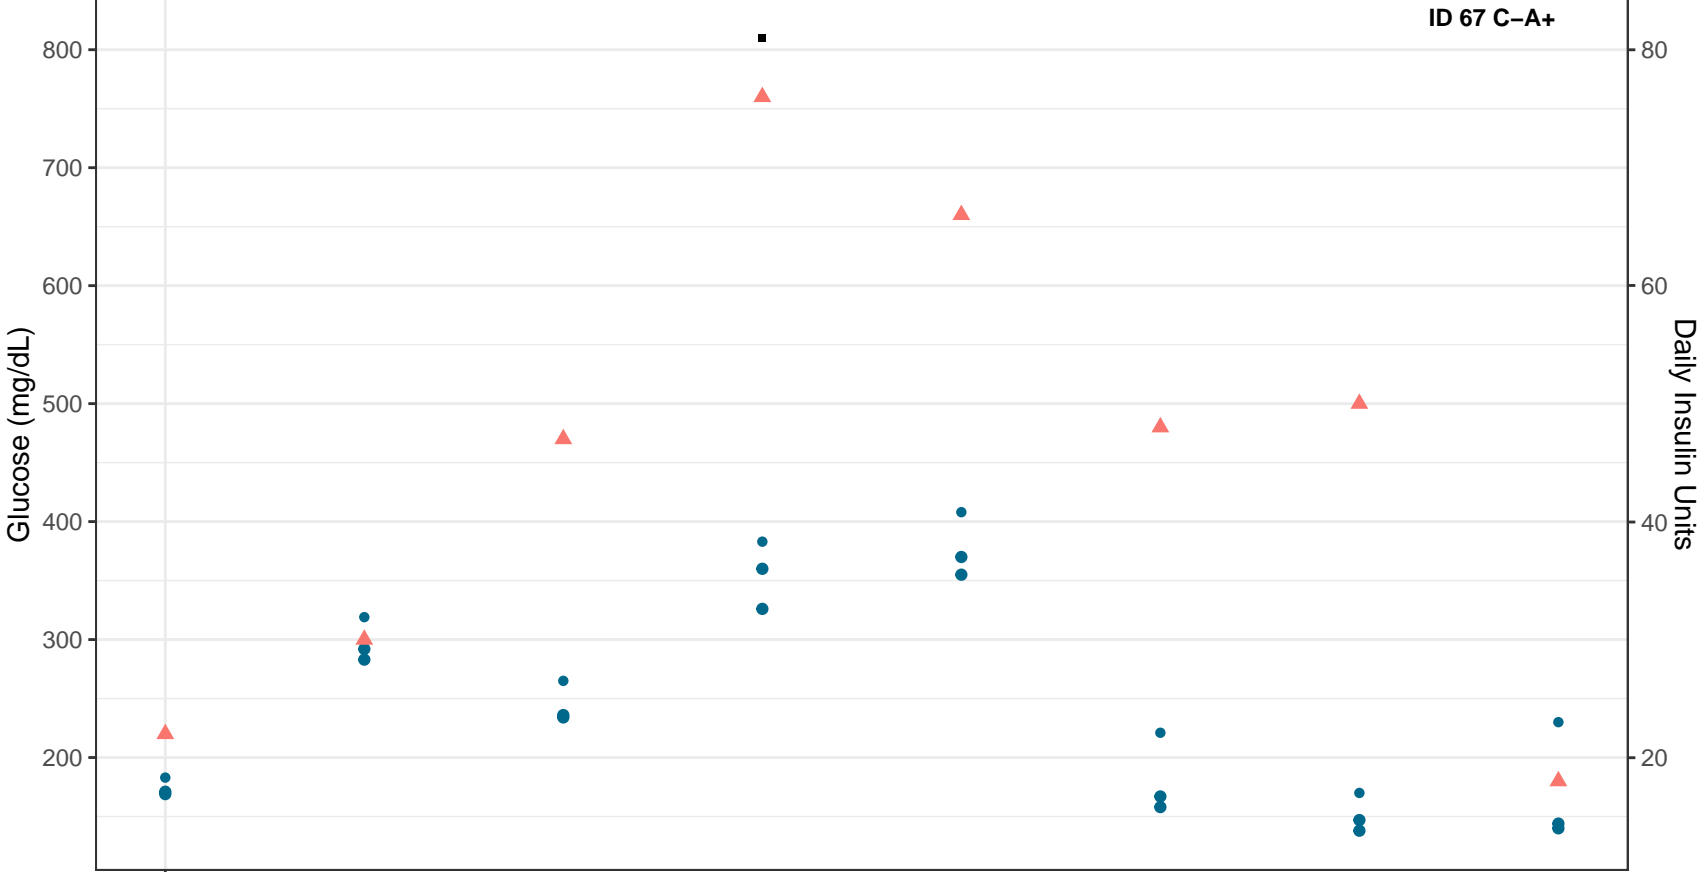

▲ Insulin      ● Glucose

ID 68 C-A-

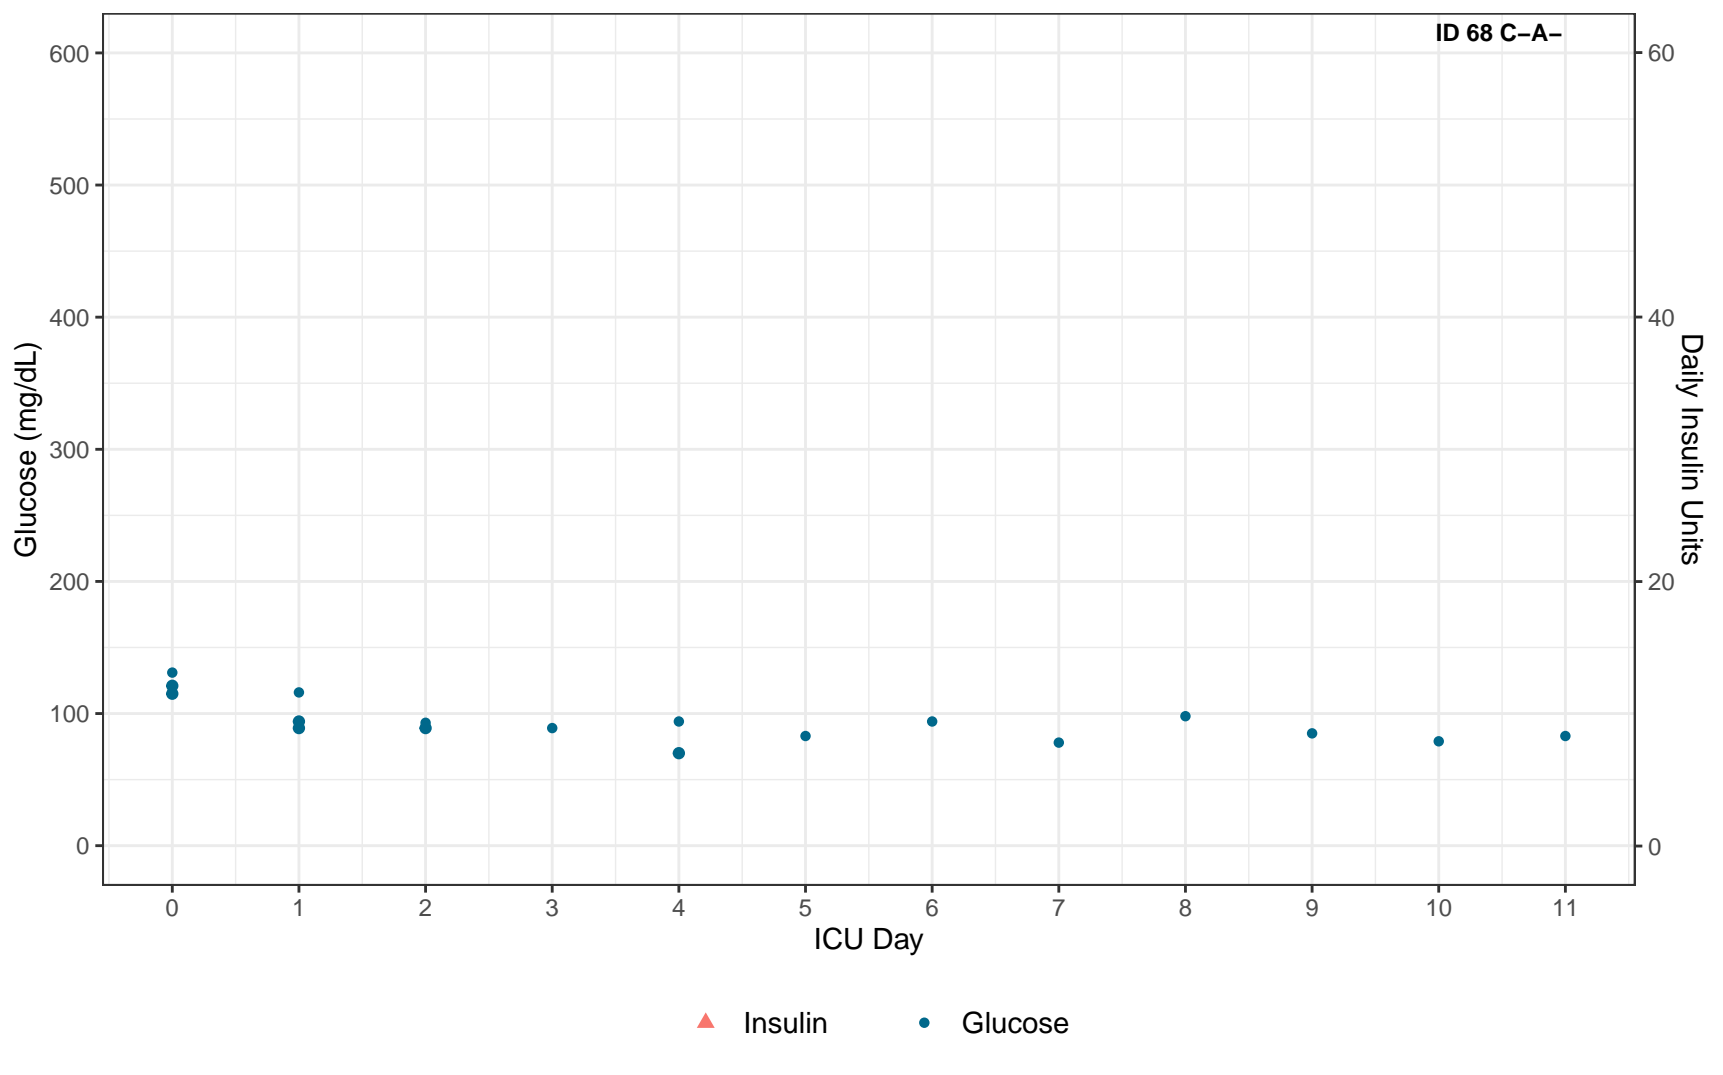

ID 69 C-A+

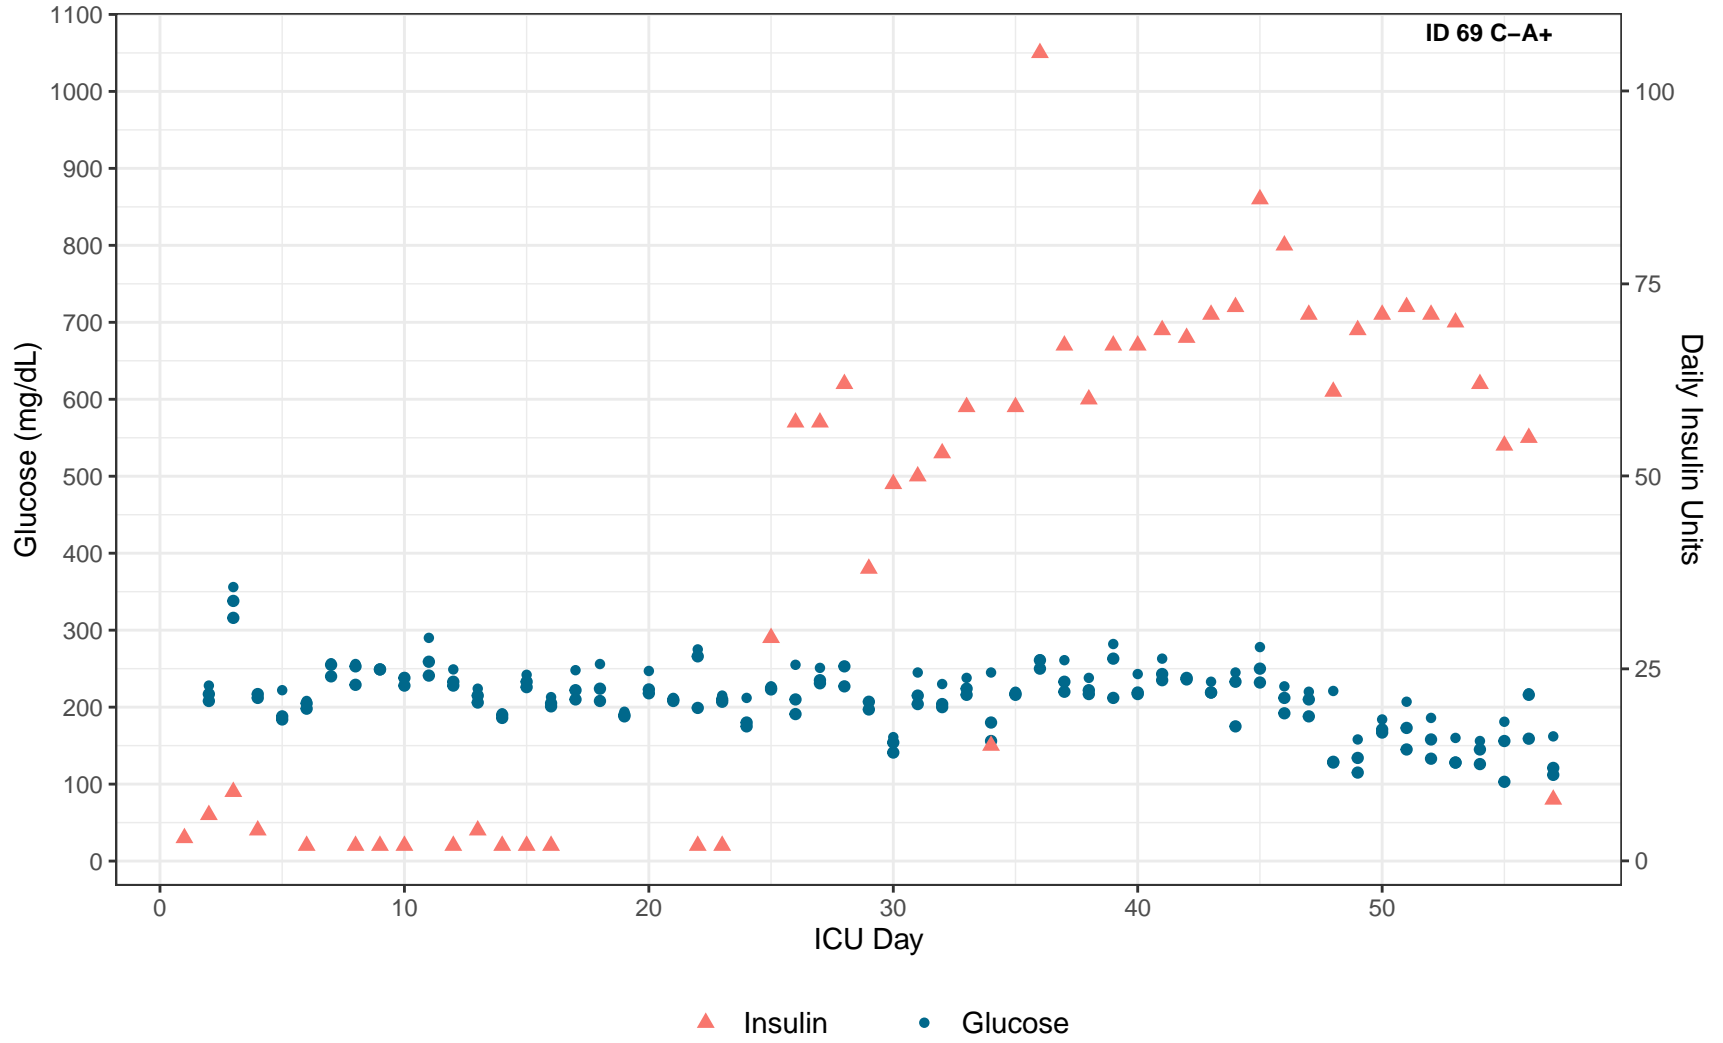

▲ Insulin ● Glucose

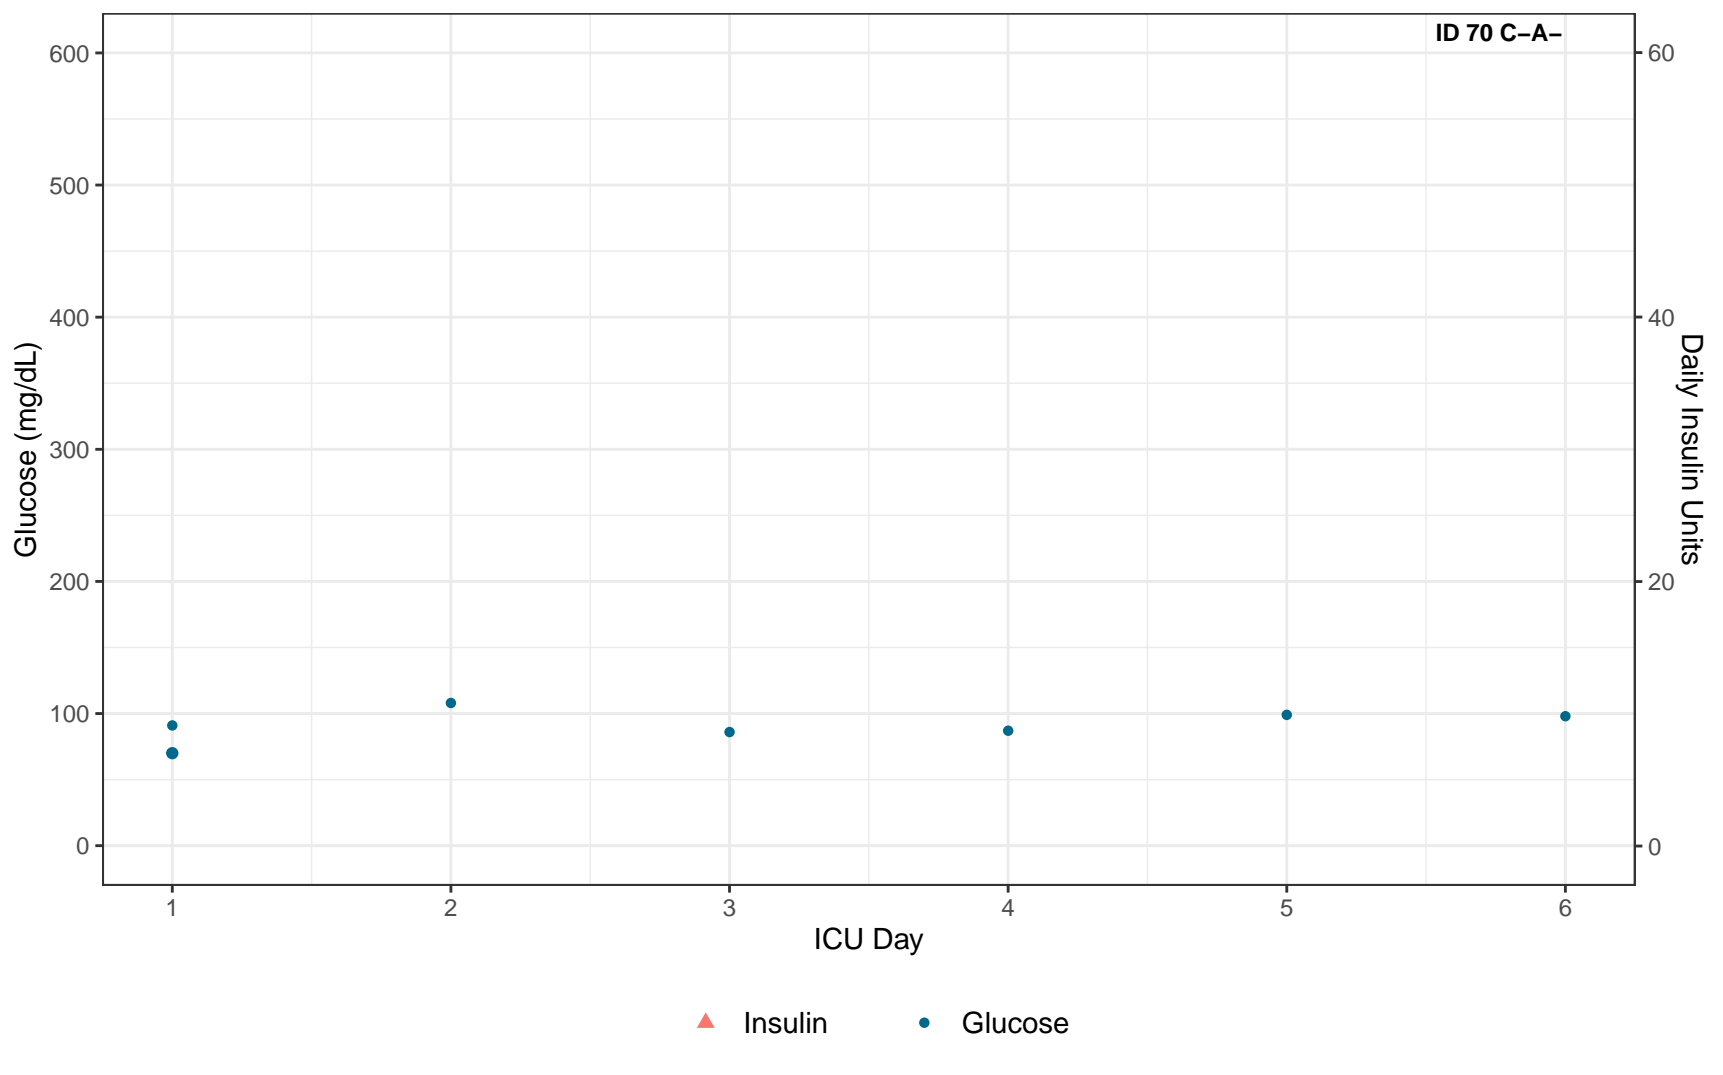

ID 71 C+A+

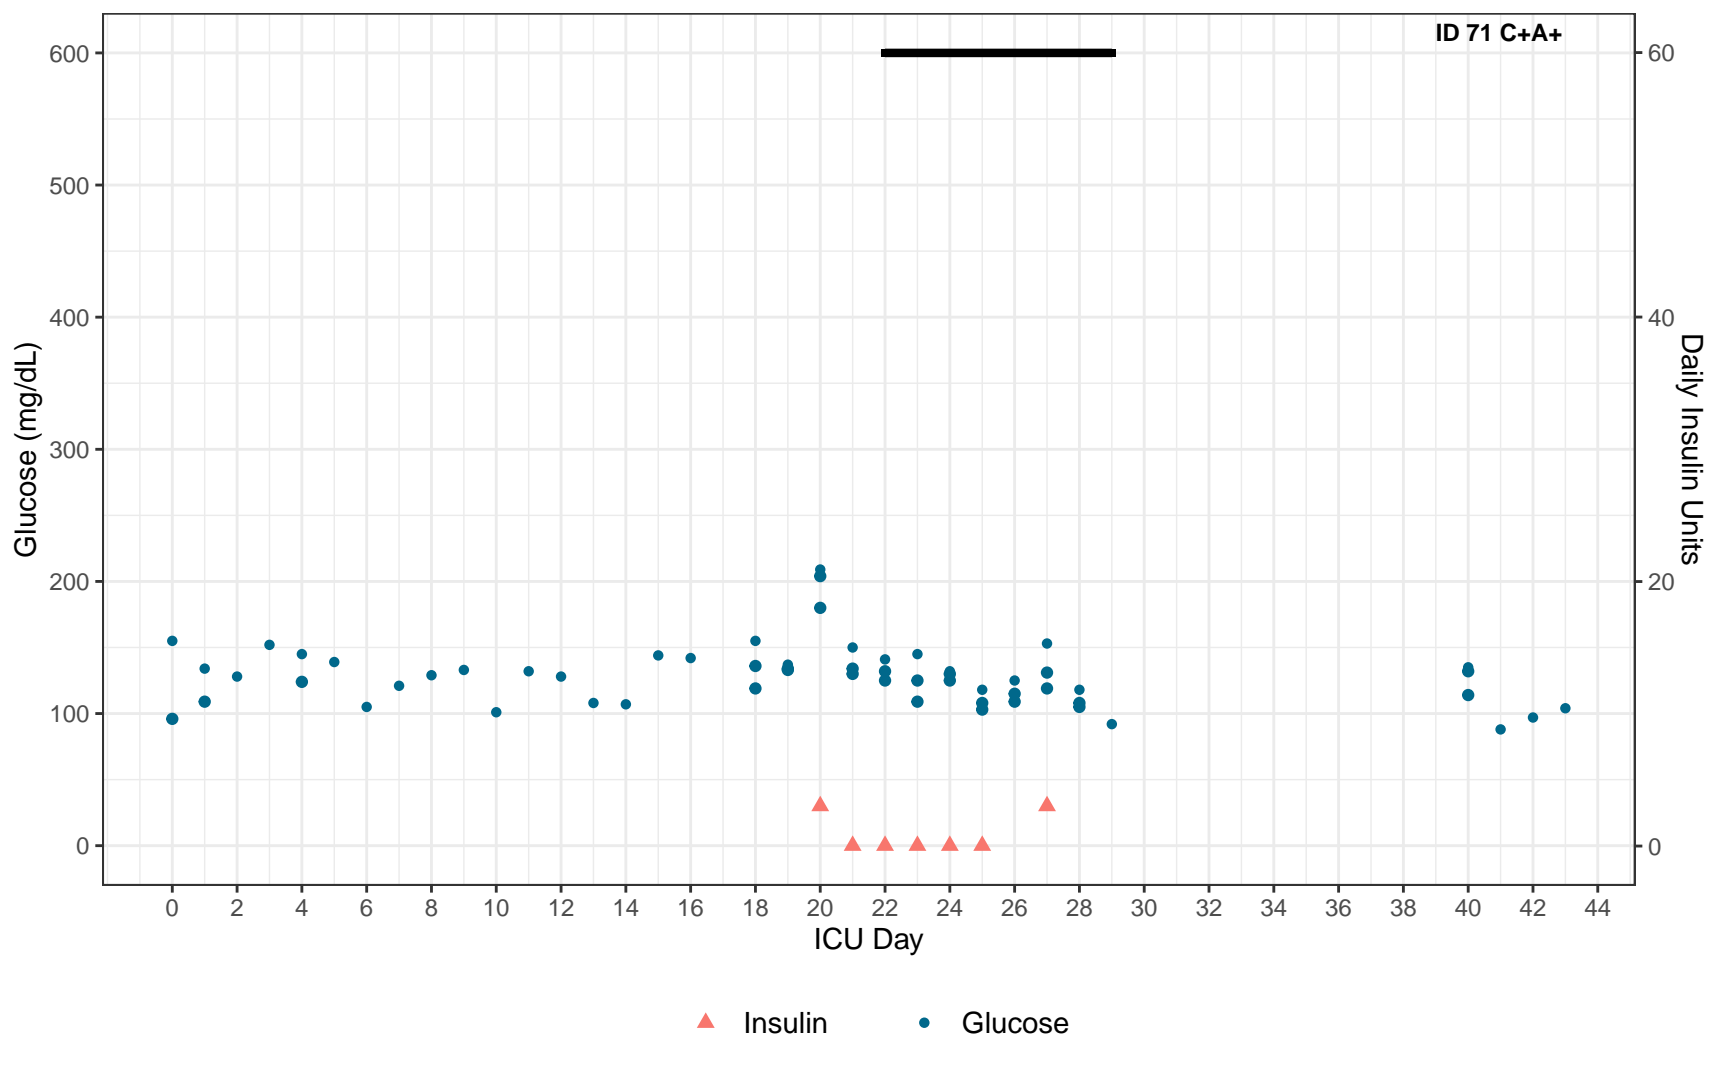

ID 72 C-A-

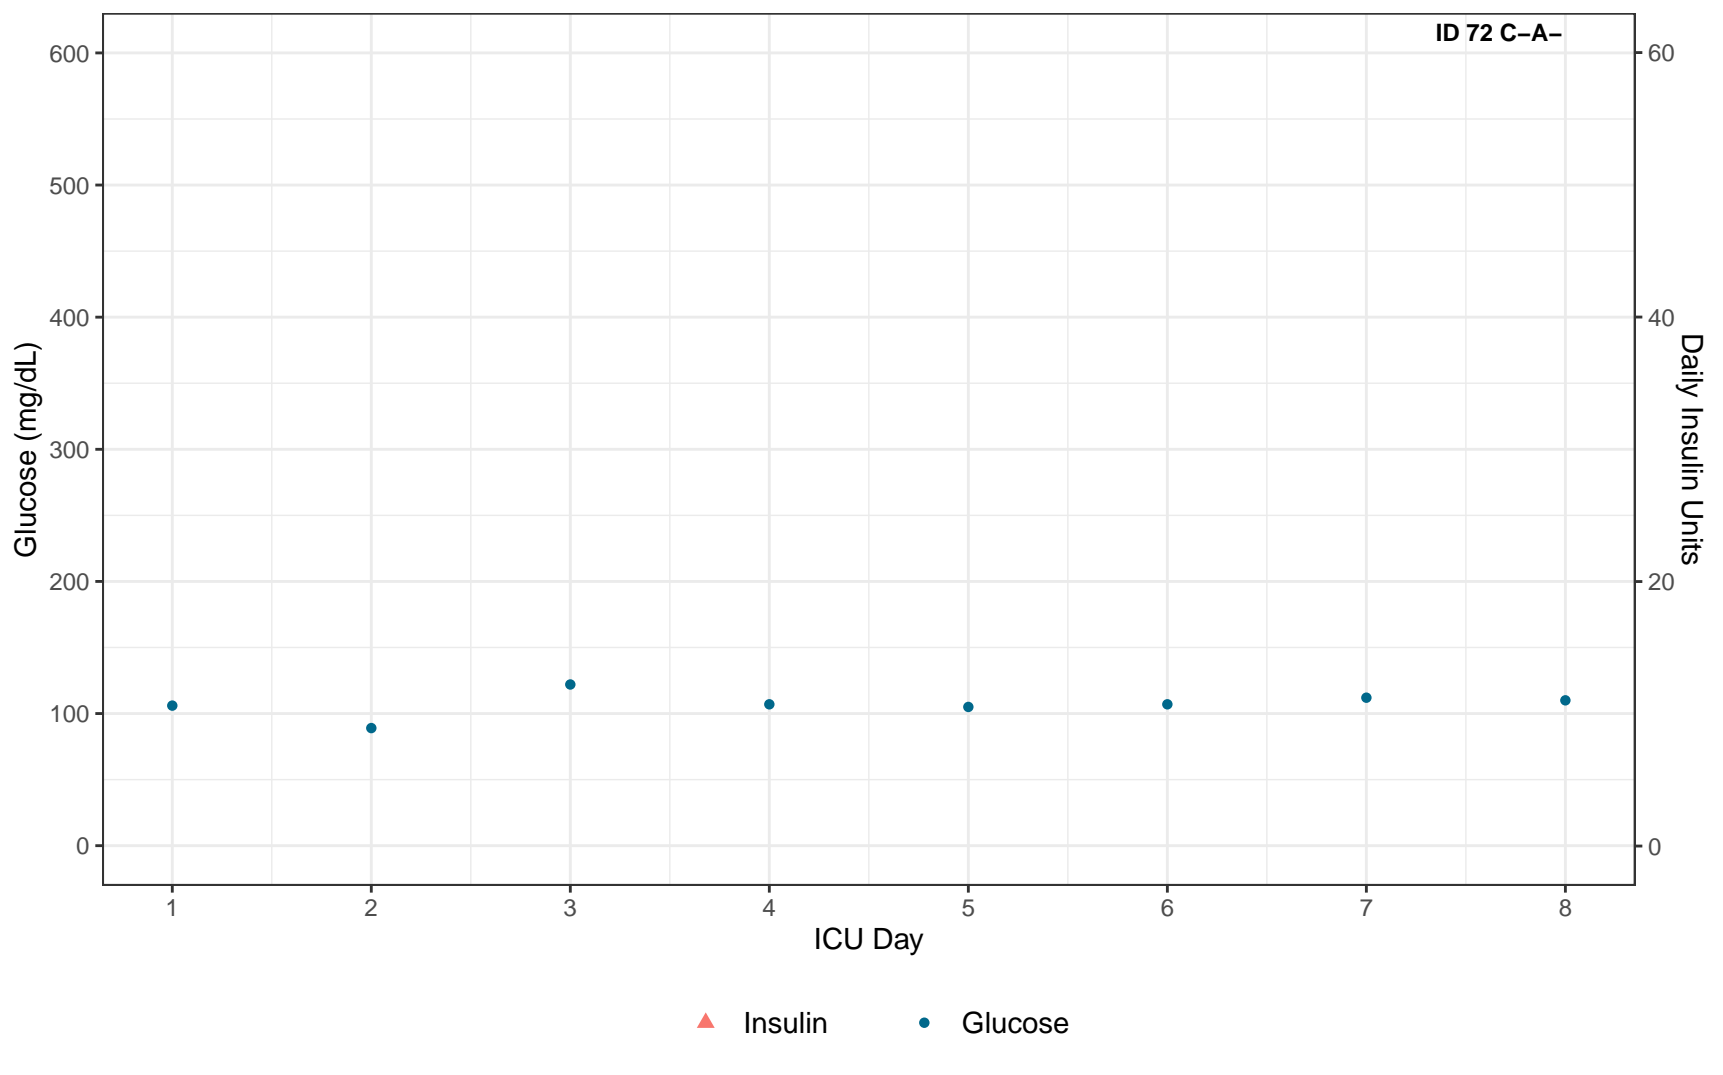

ID 73 C-A-

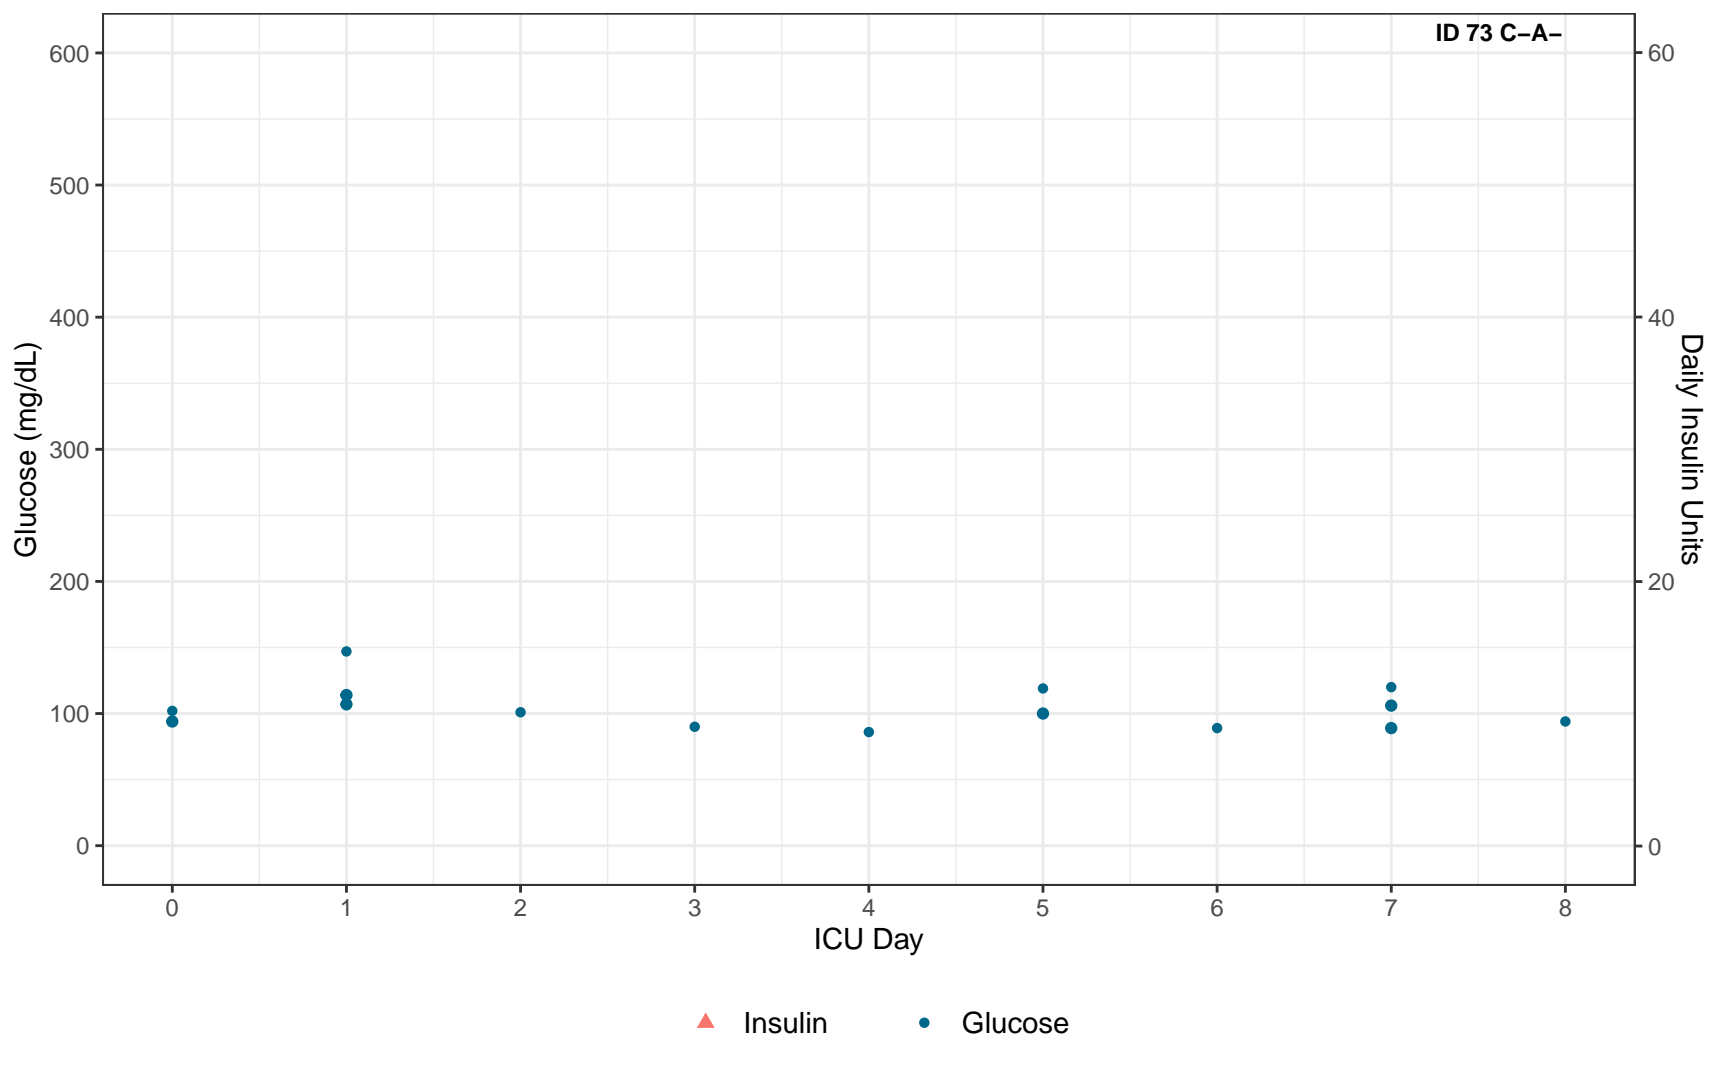

ID 74 C-A-

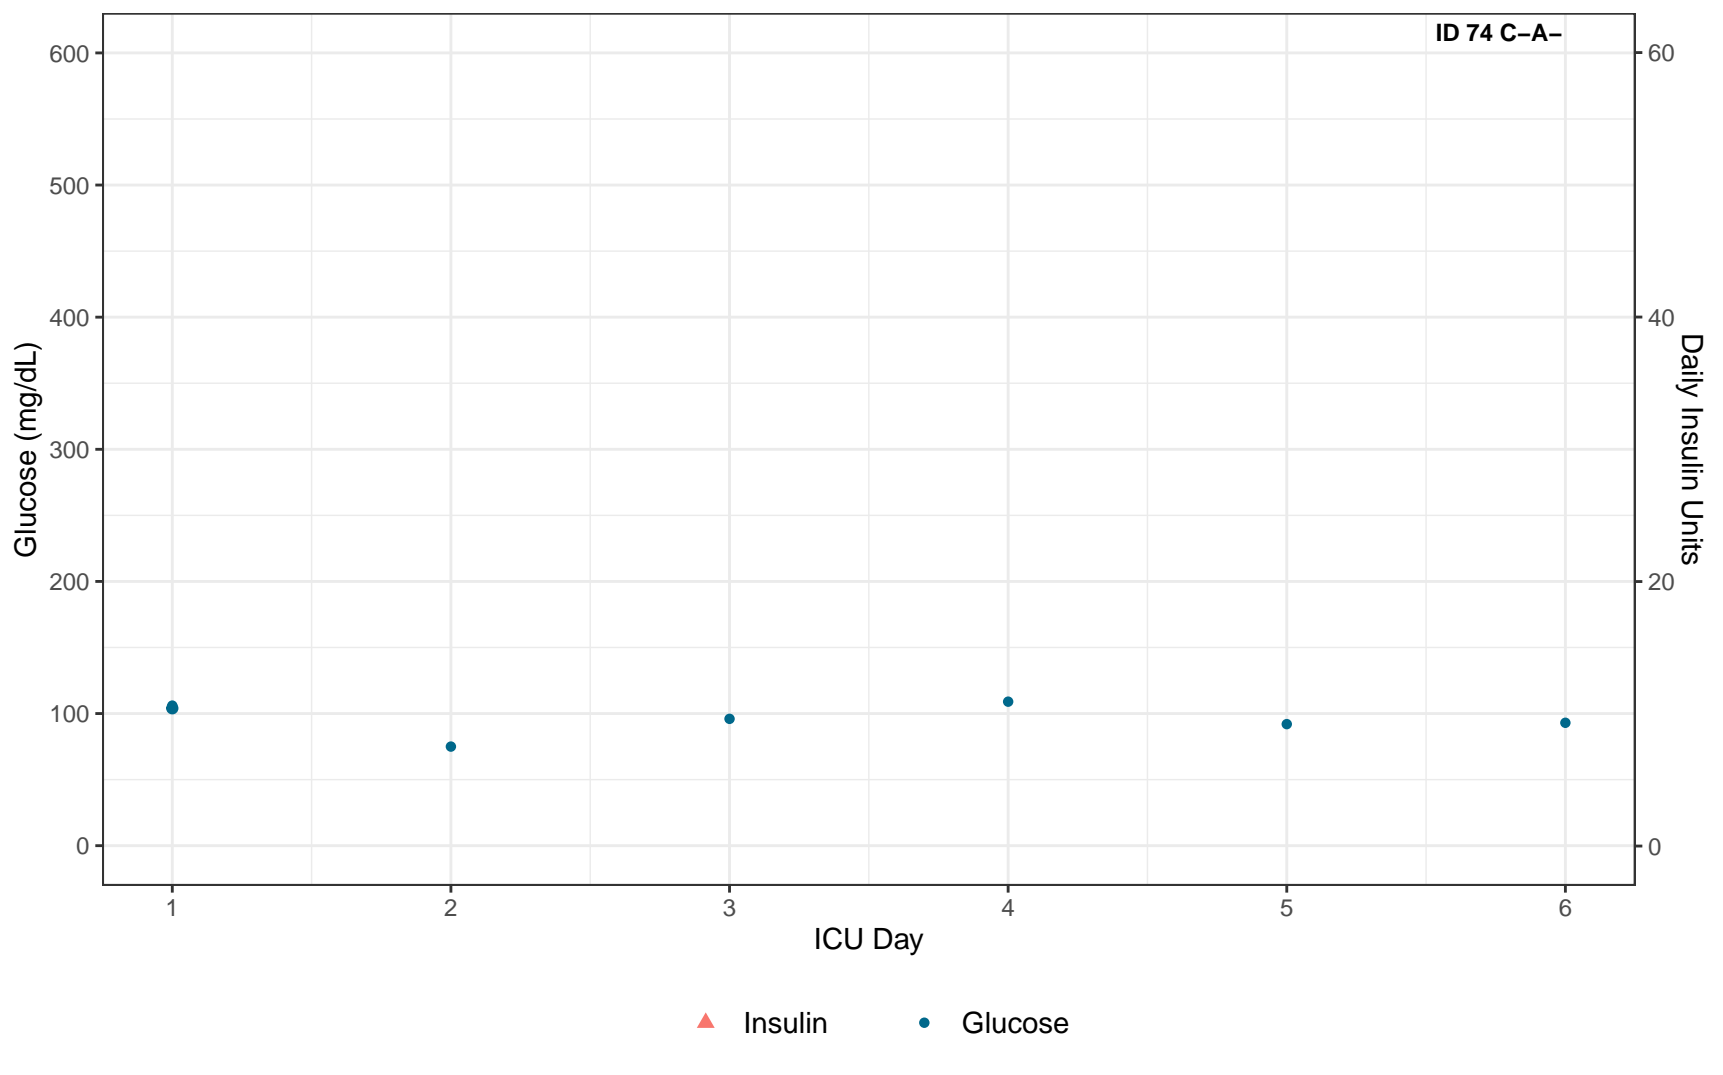

Glucose (mg/dL)

Daily Insulin Units

1

2

3

4

5

6

ICU Day

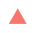

Insulin

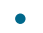

Glucose



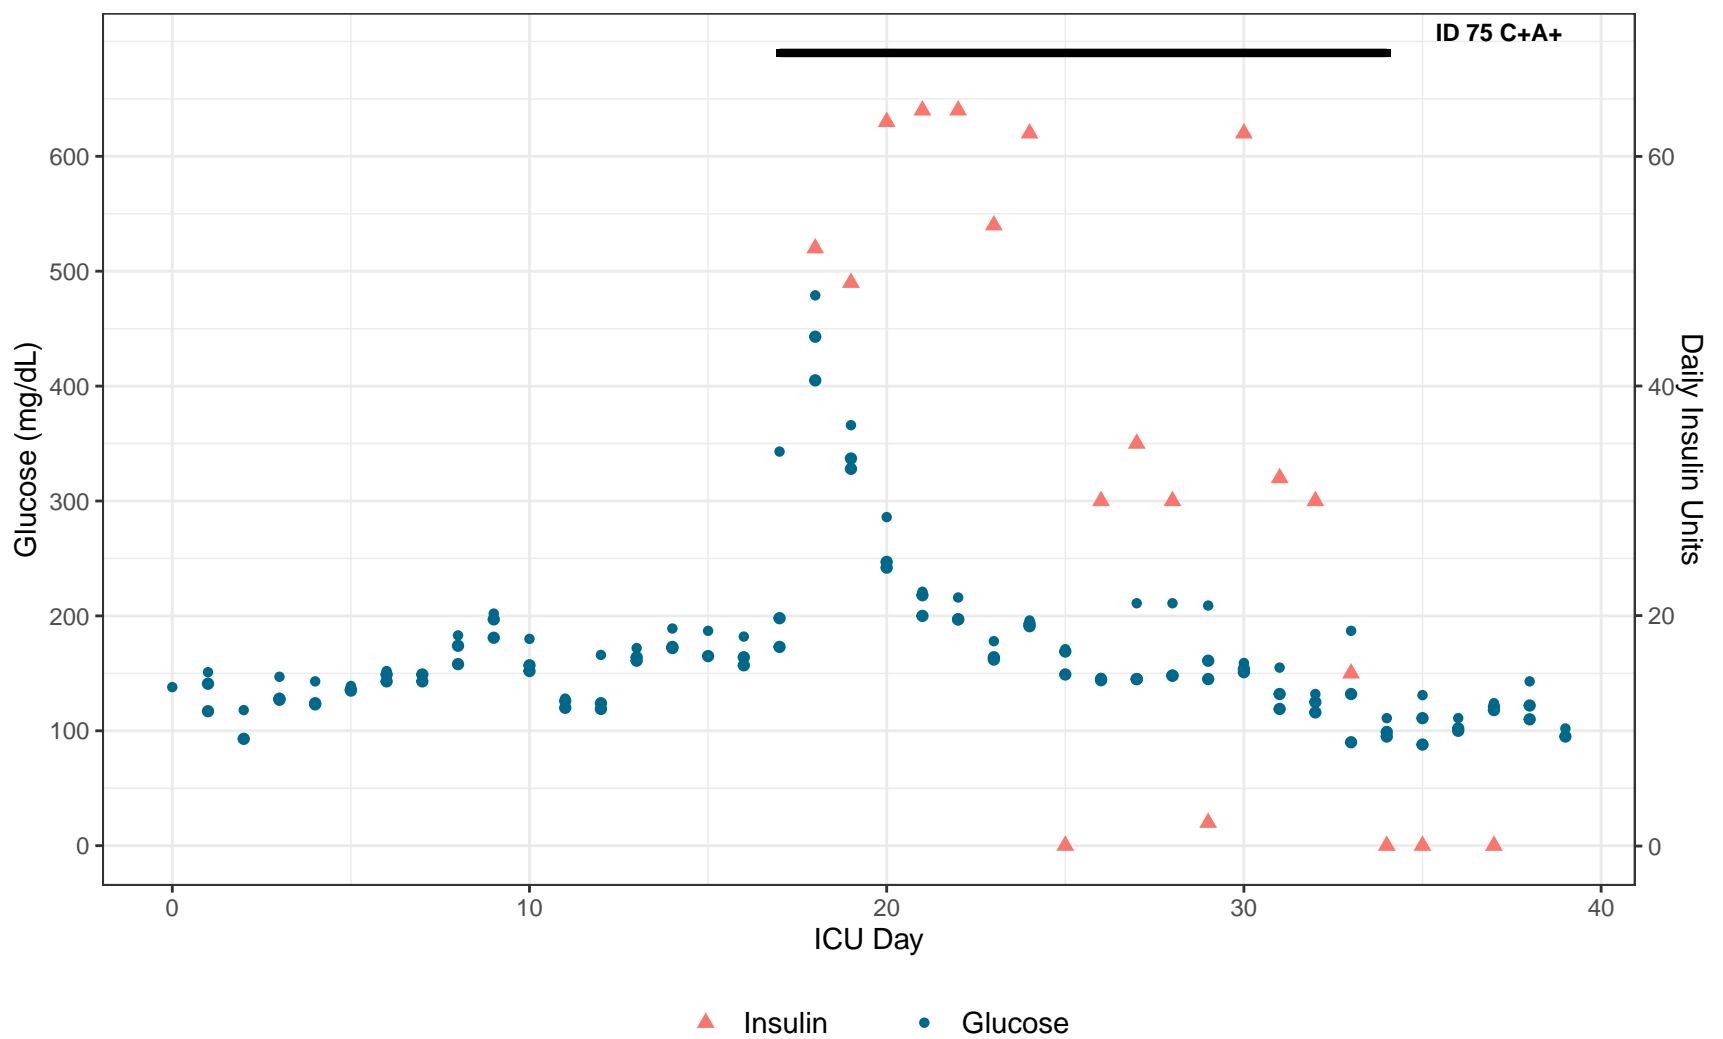

ID 76 C+A+

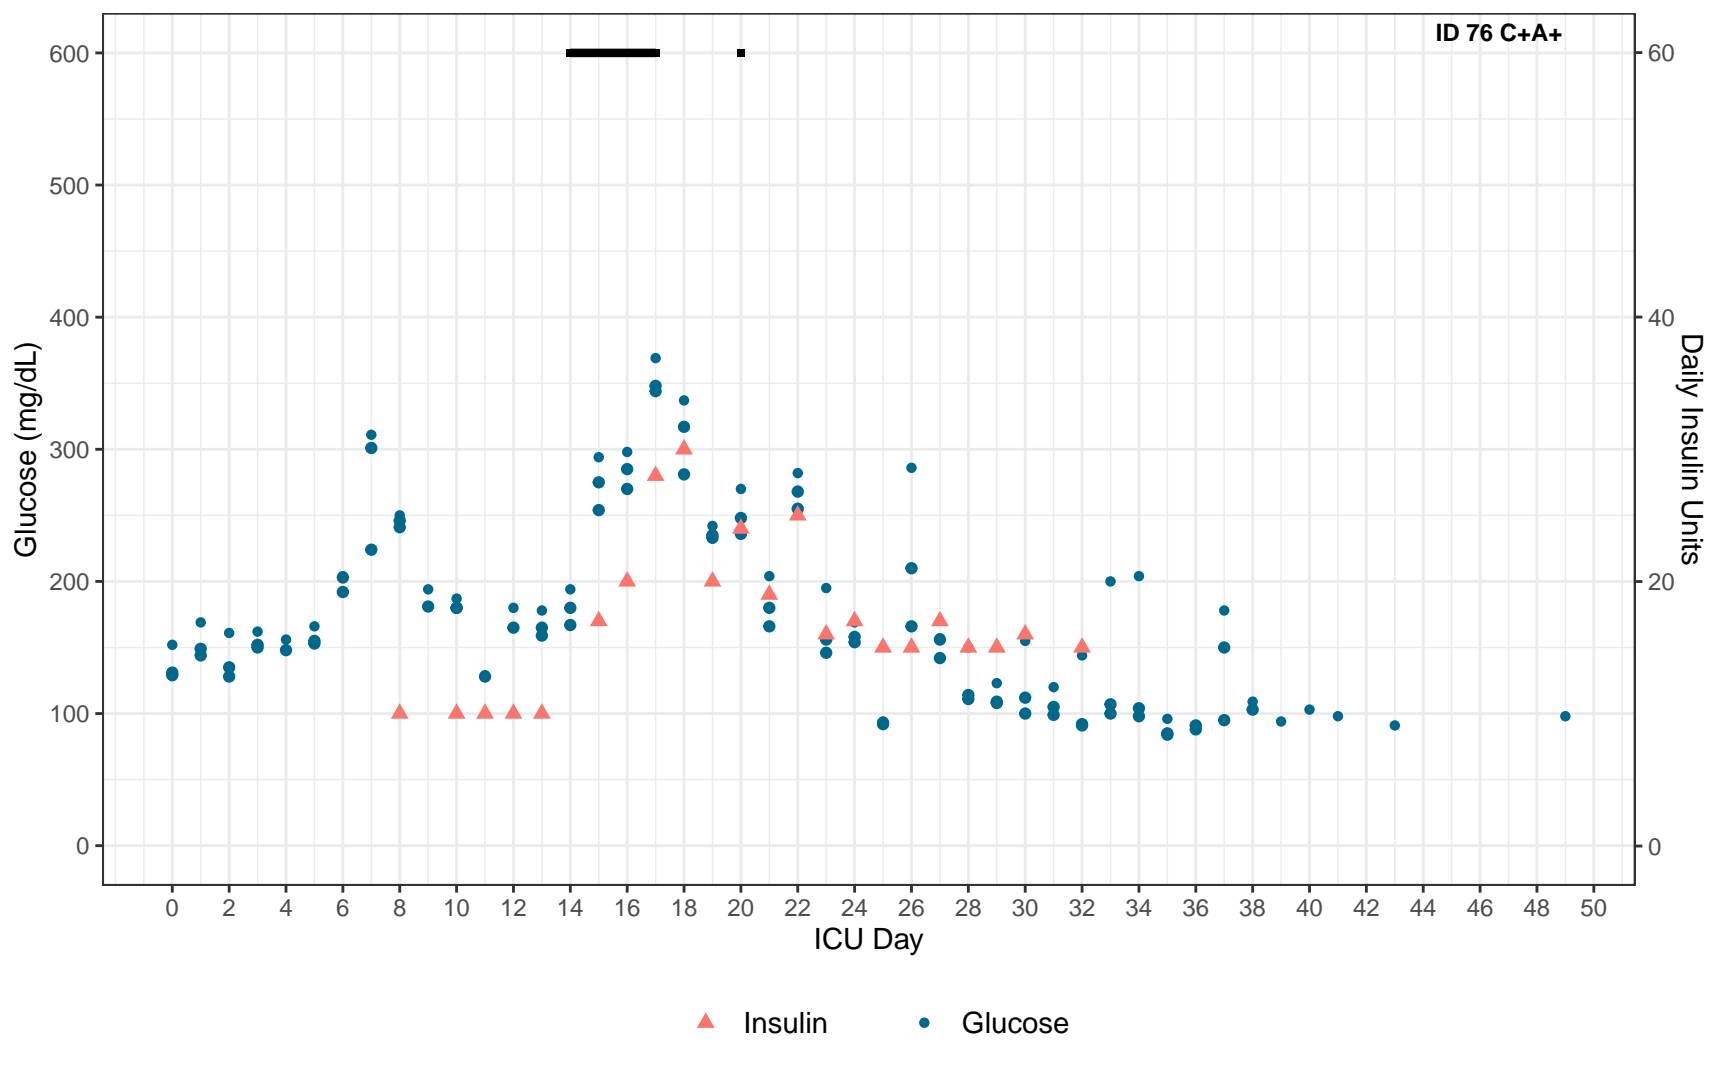

ID 77 C+A+

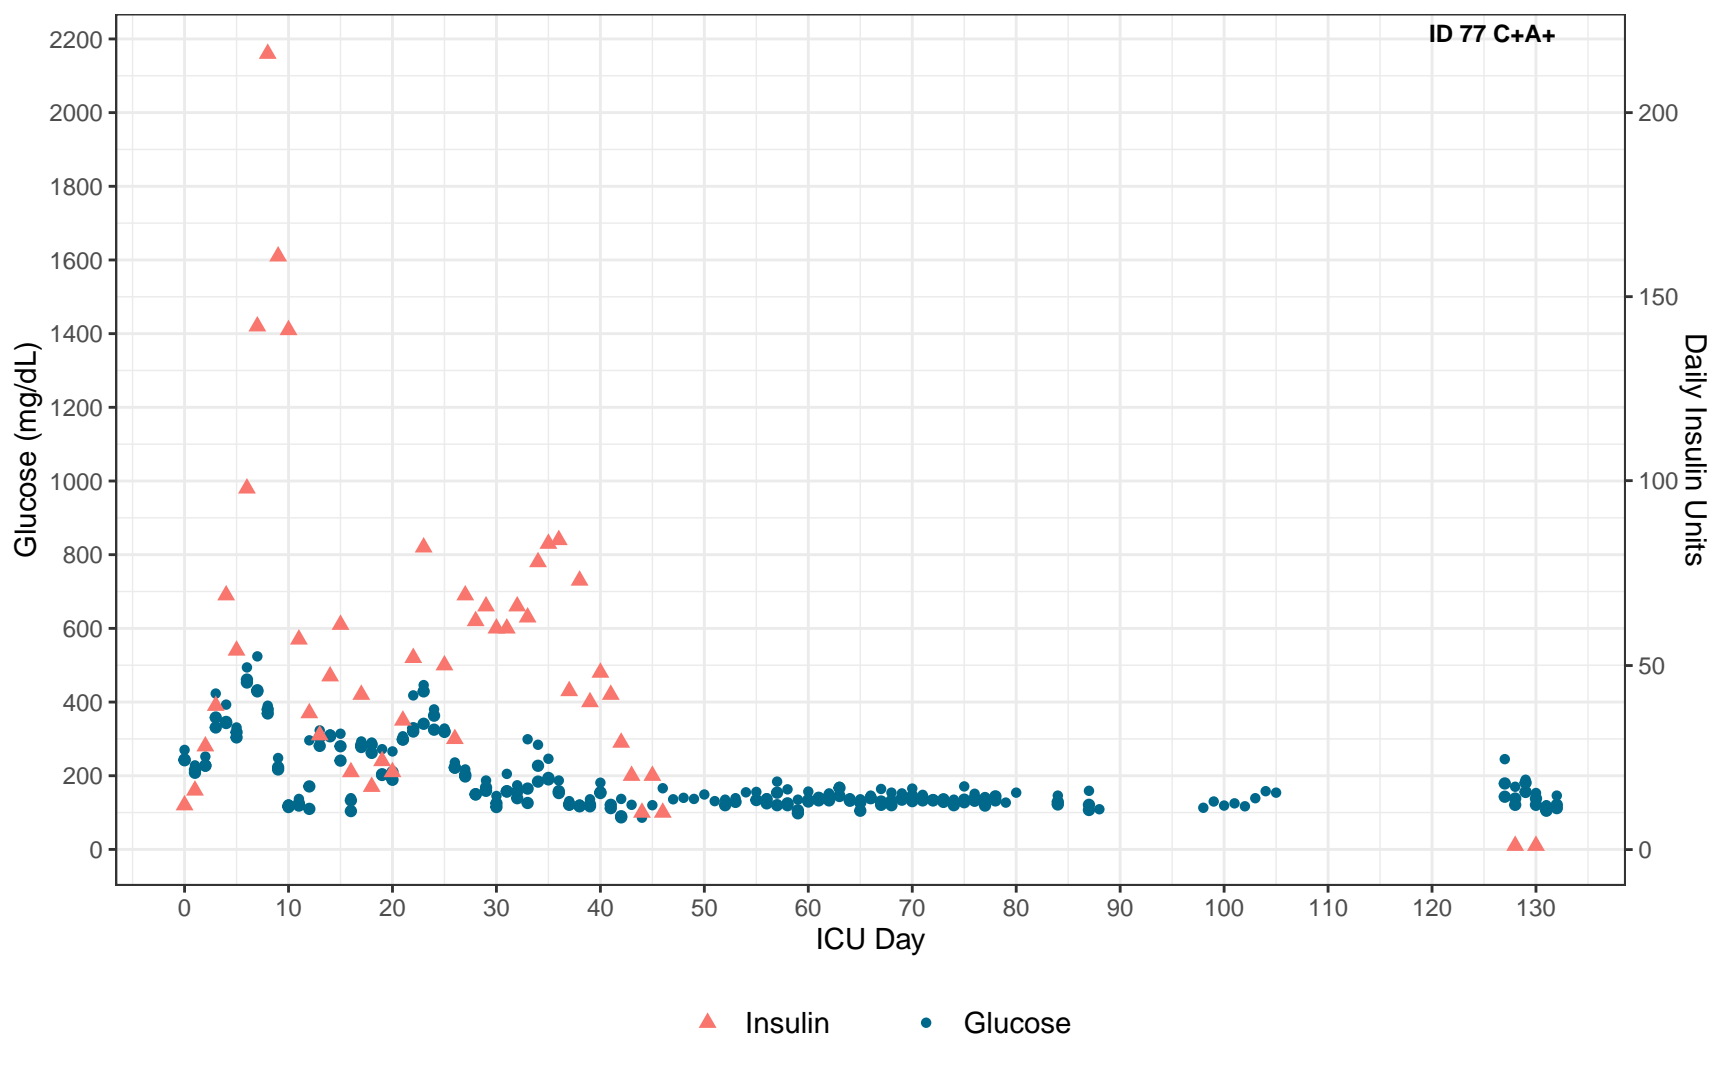

ID 78 C+A+

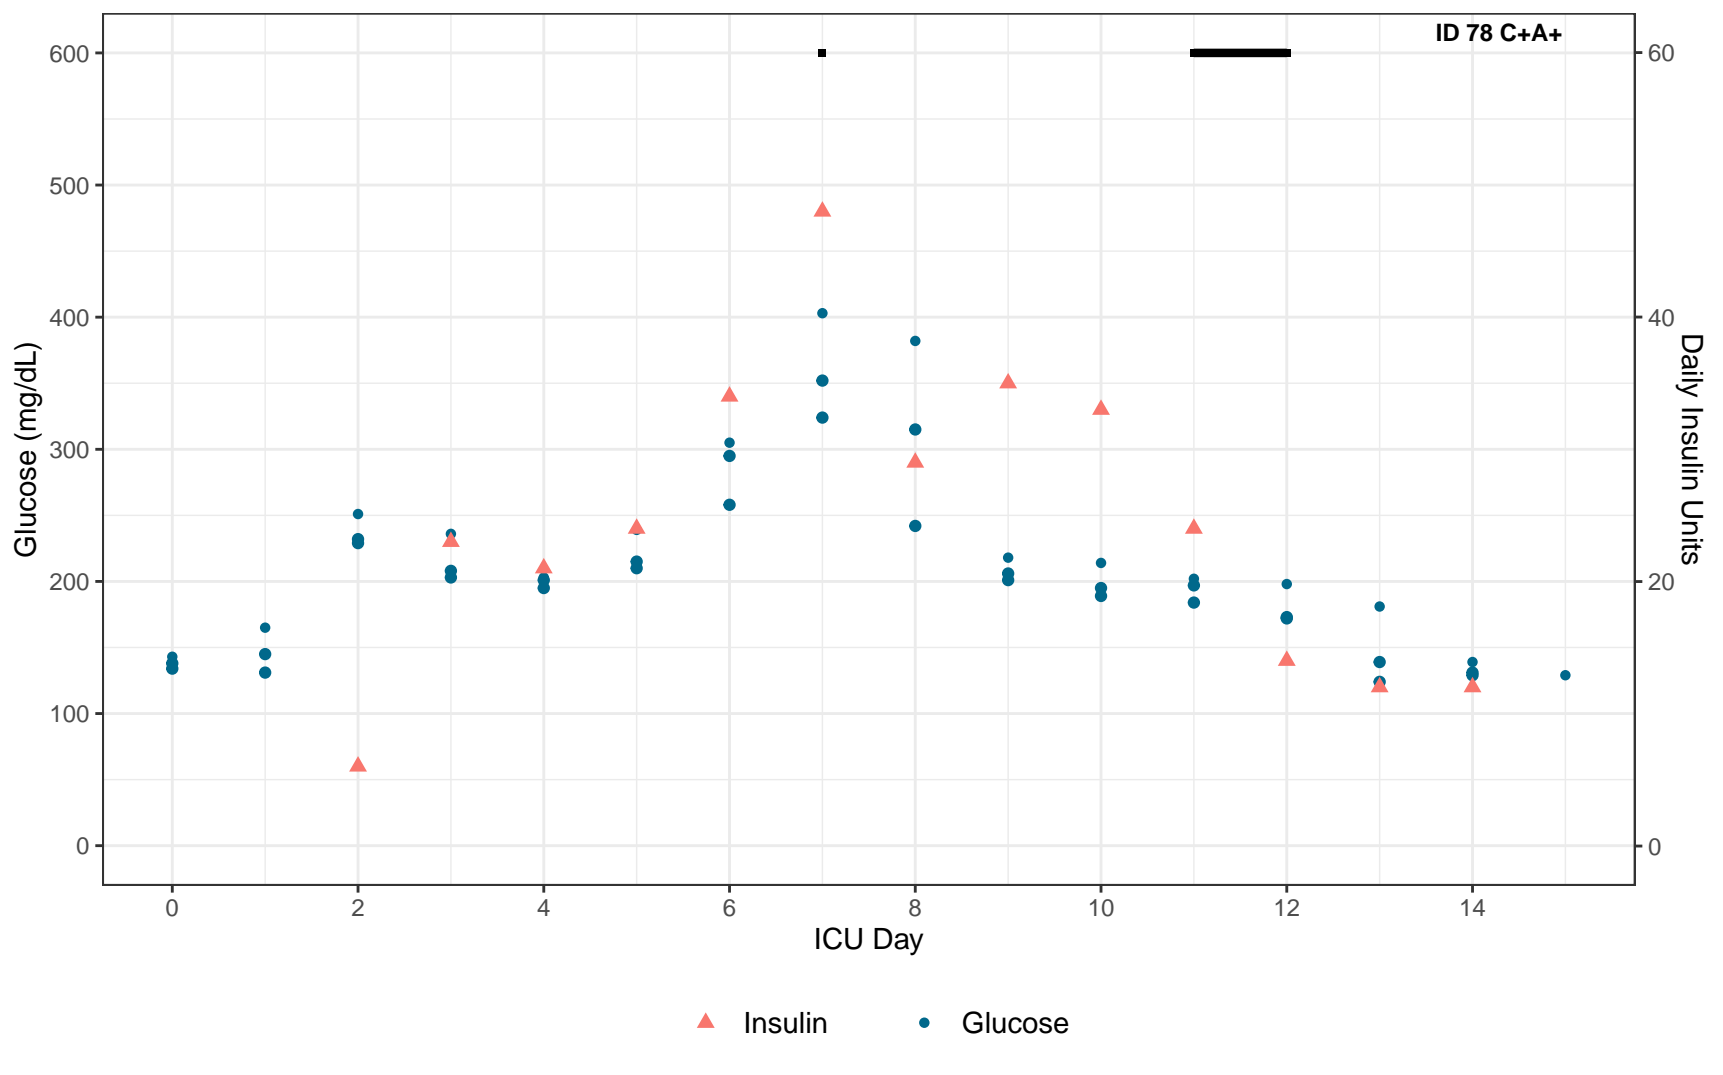

ID 79 C+A+

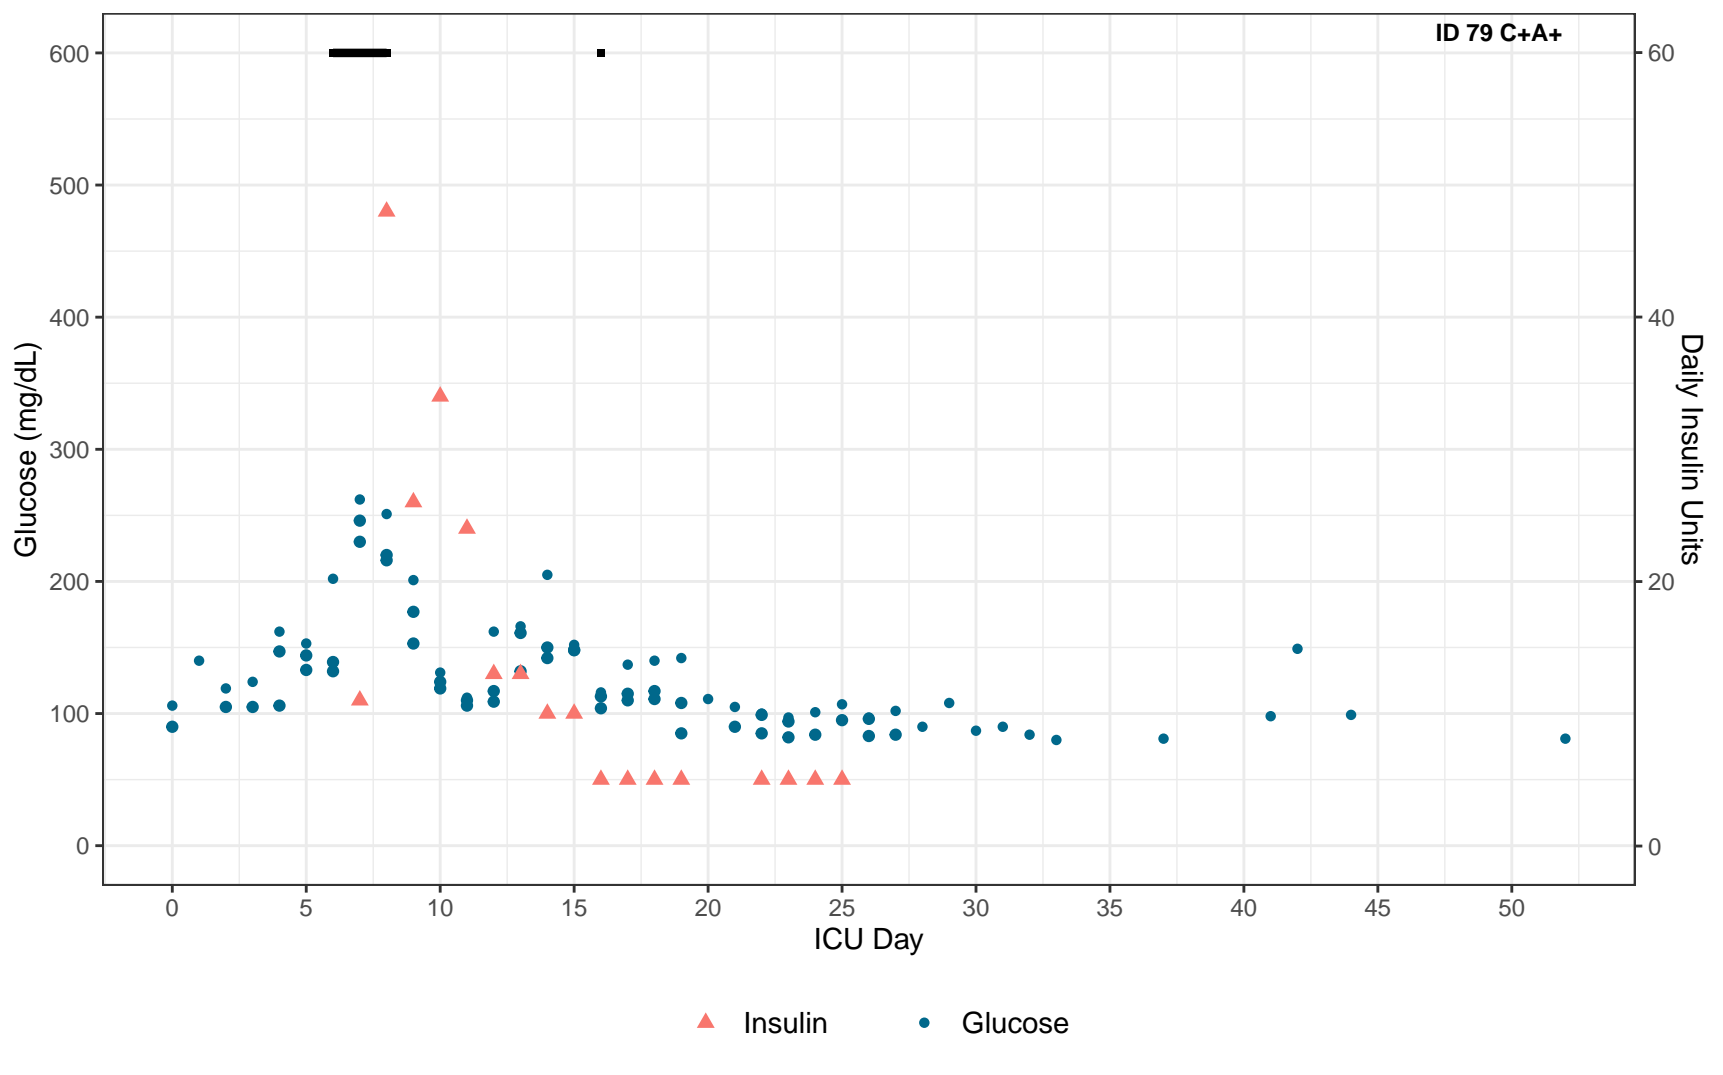

▲ Insulin ● Glucose

ID 80 C+A+

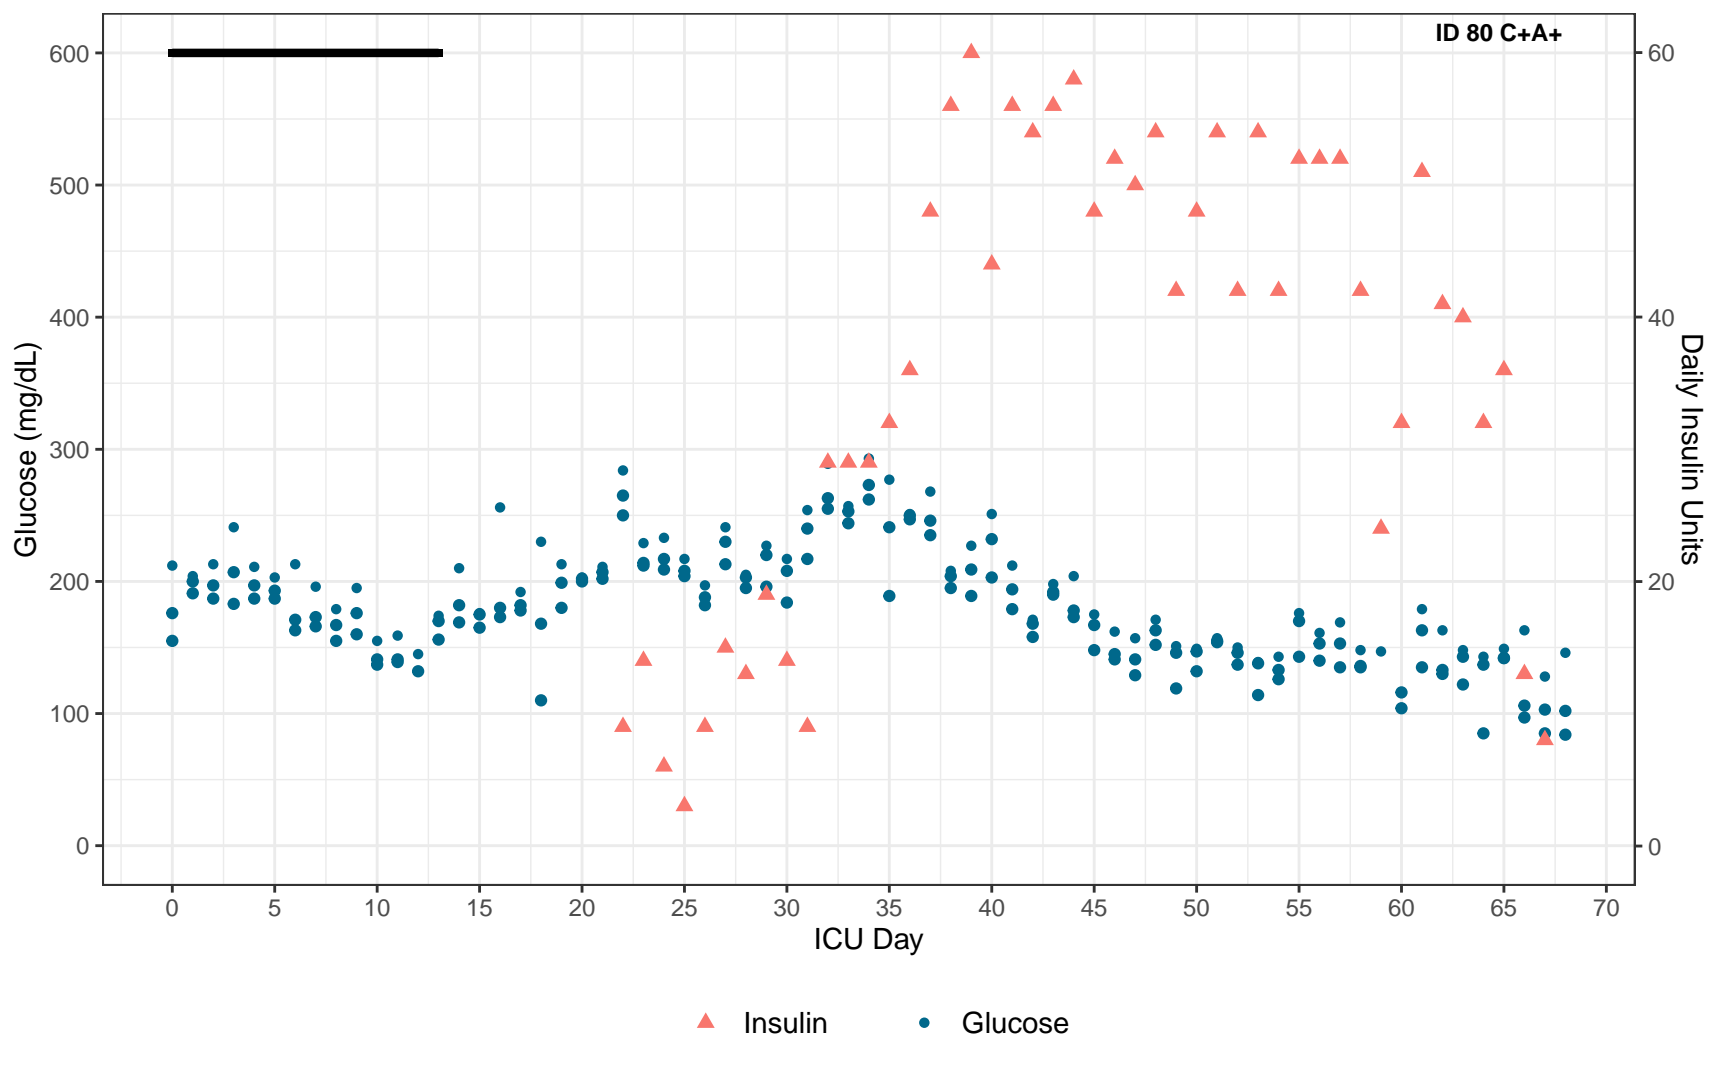

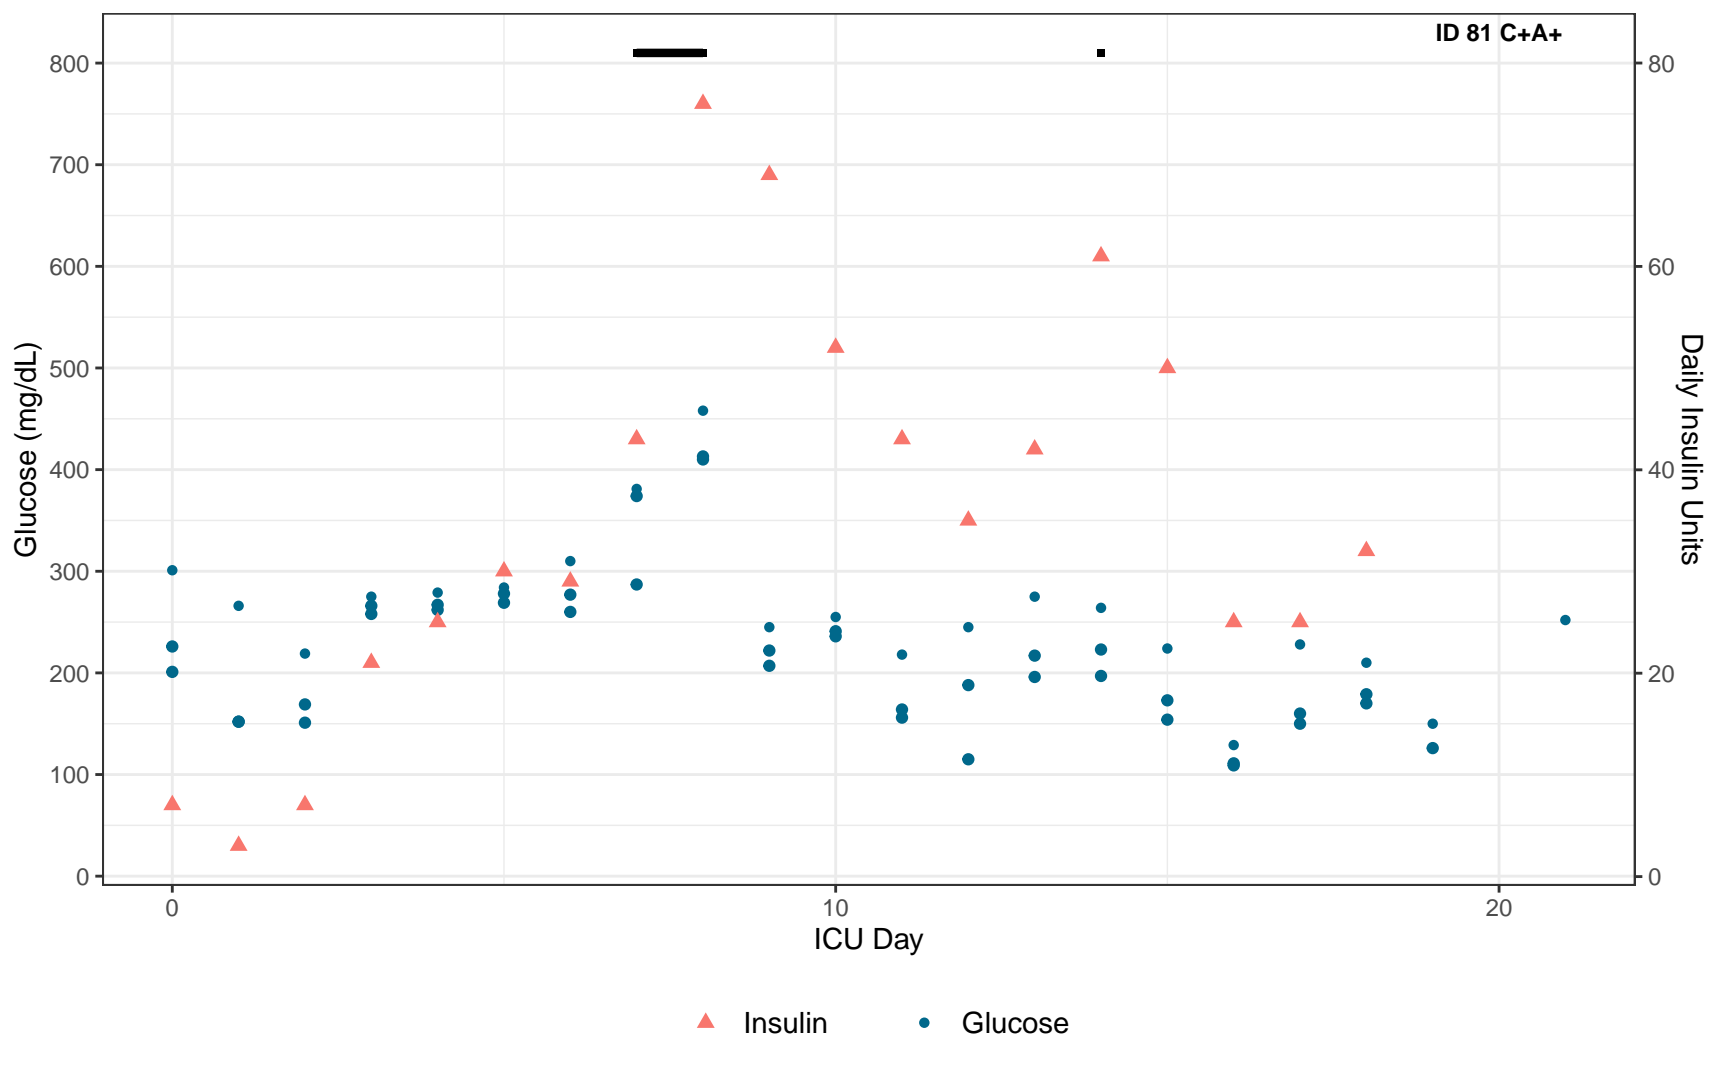

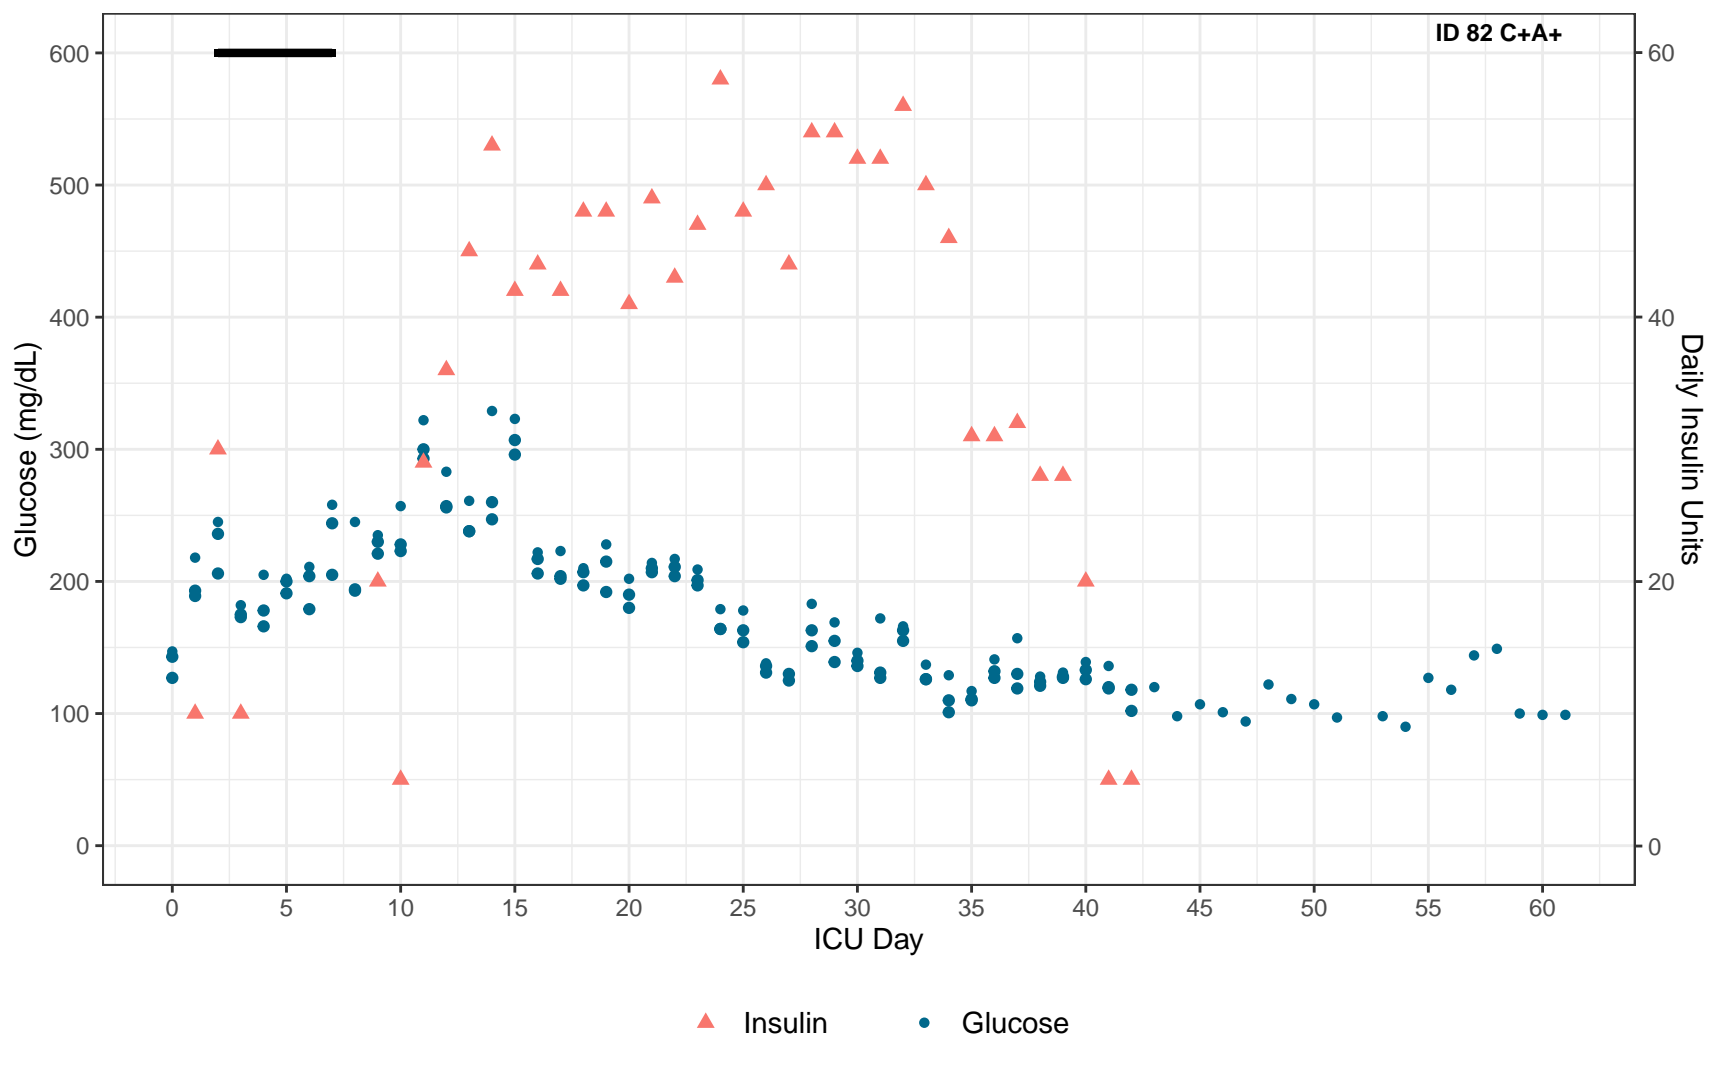

▲ Insulin ● Glucose



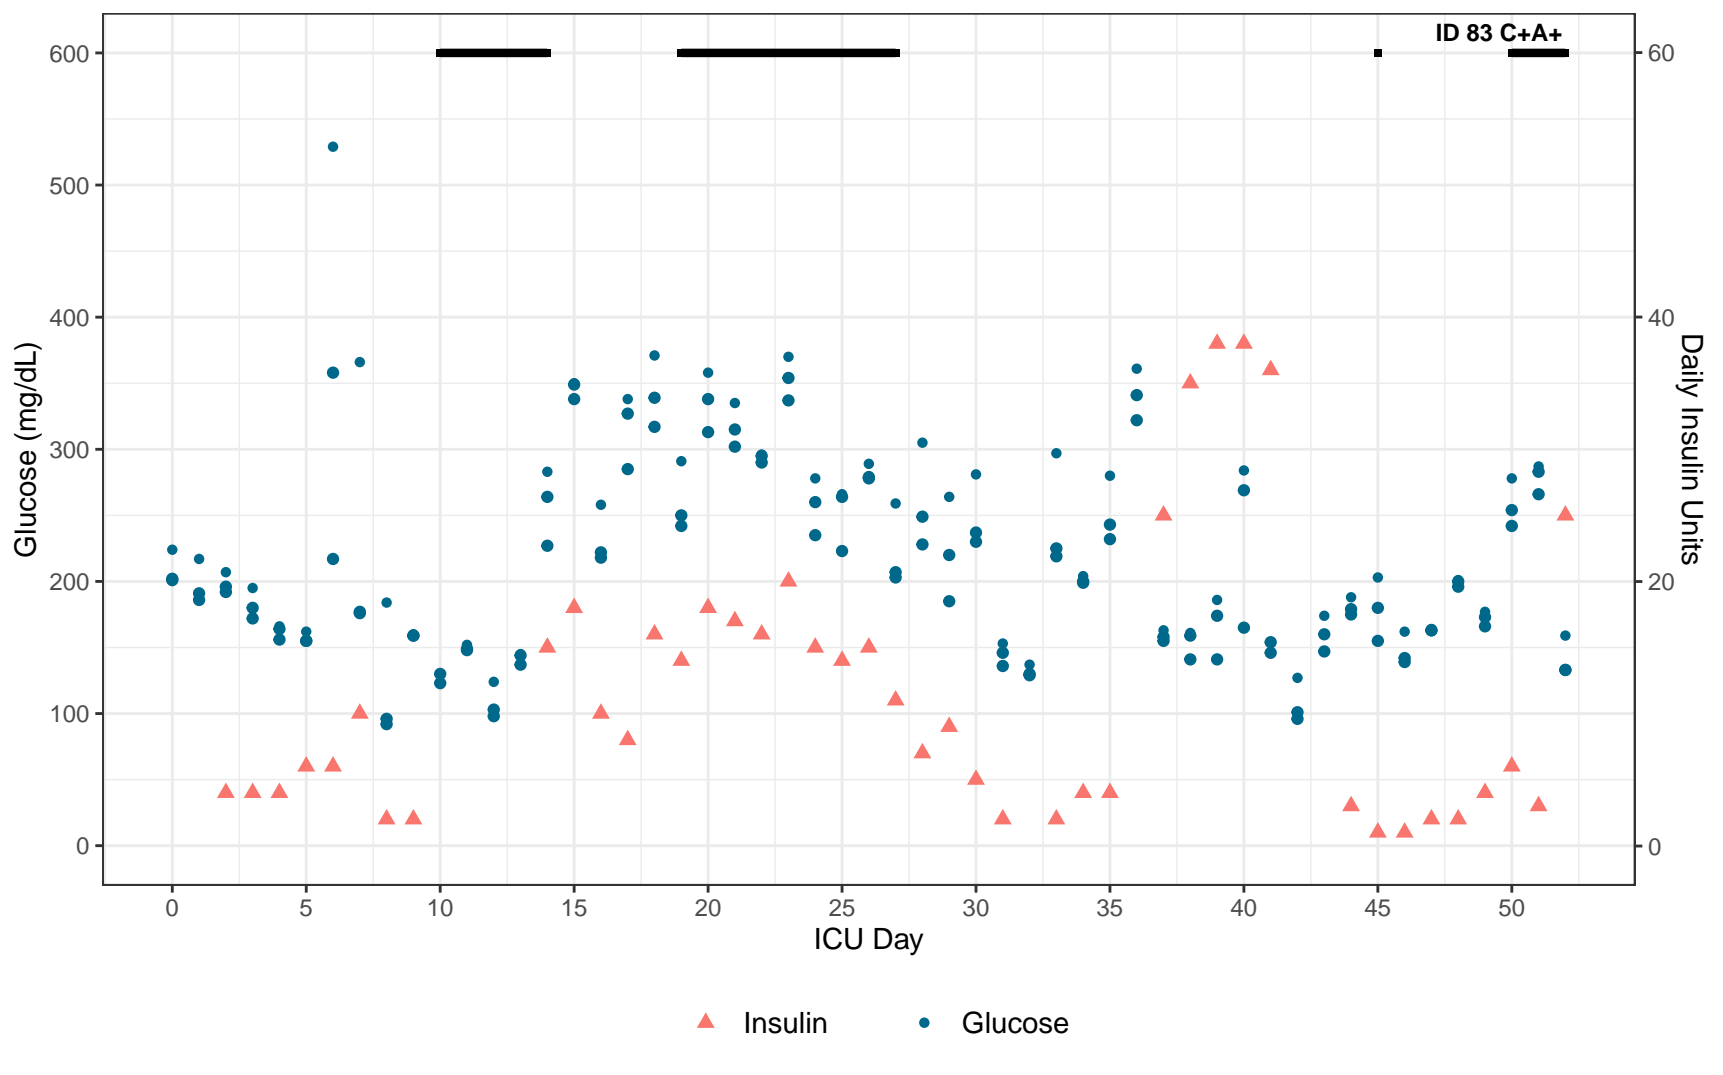

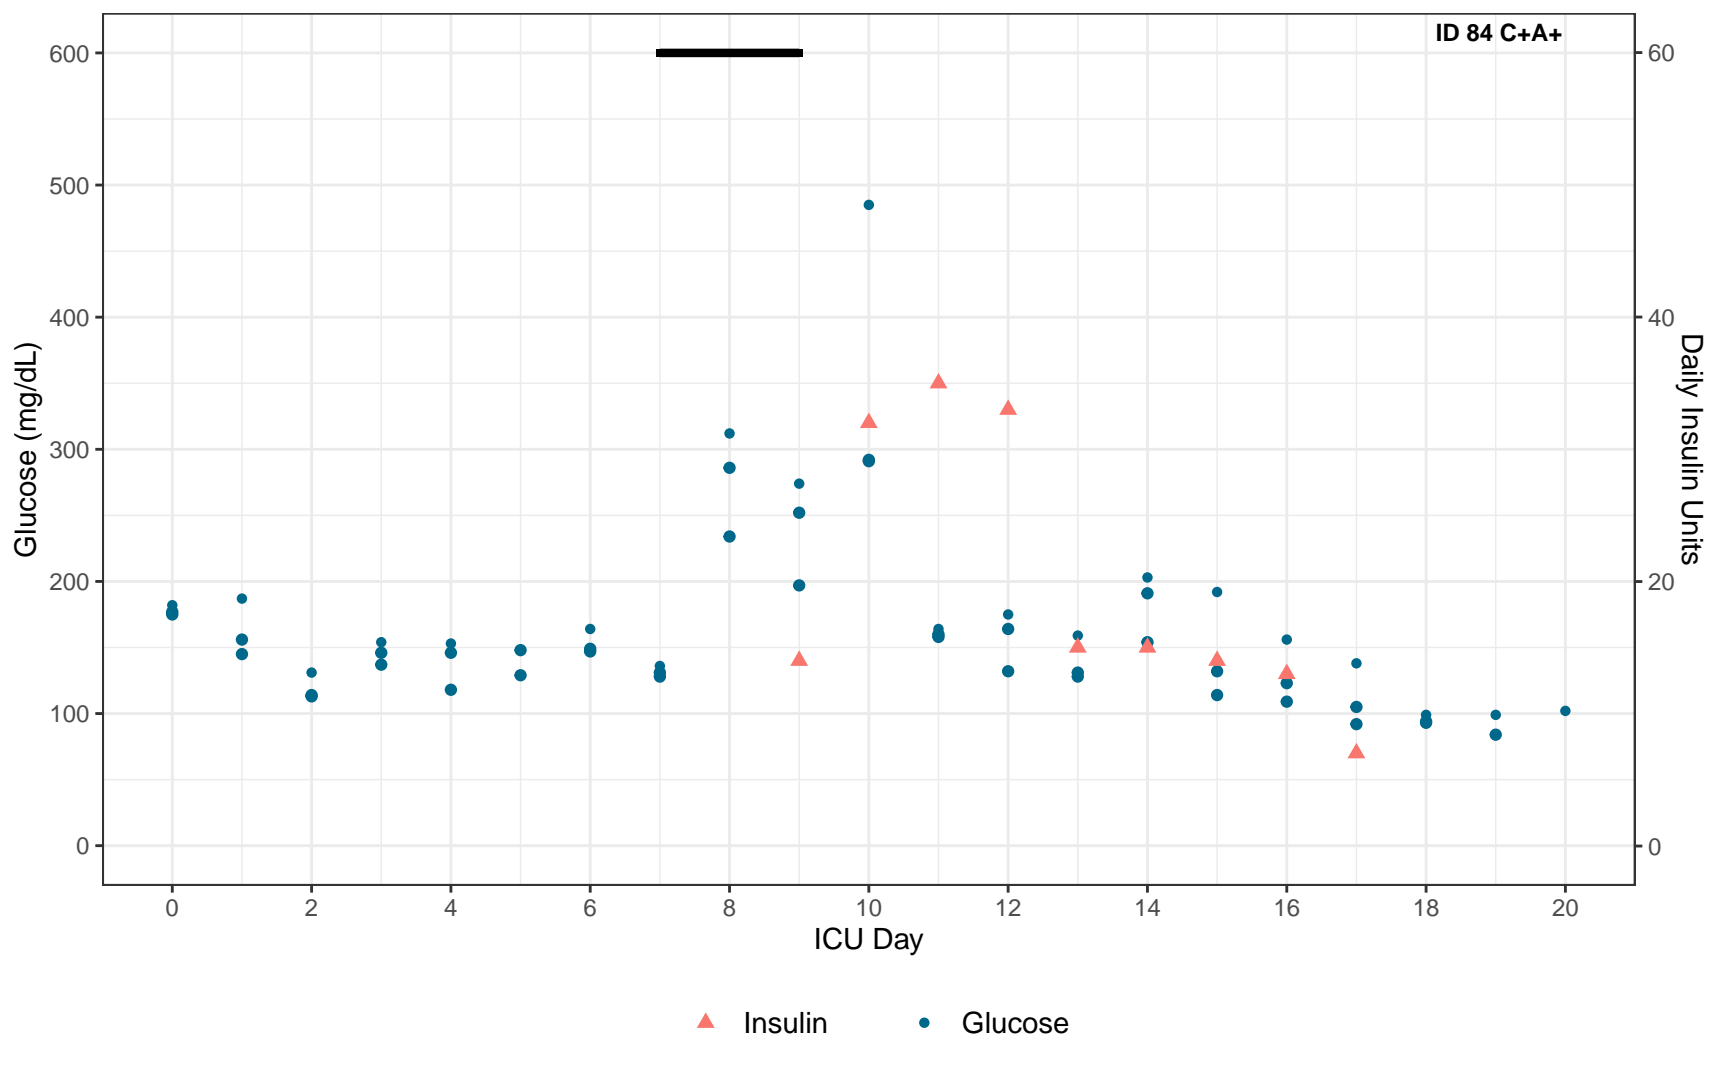

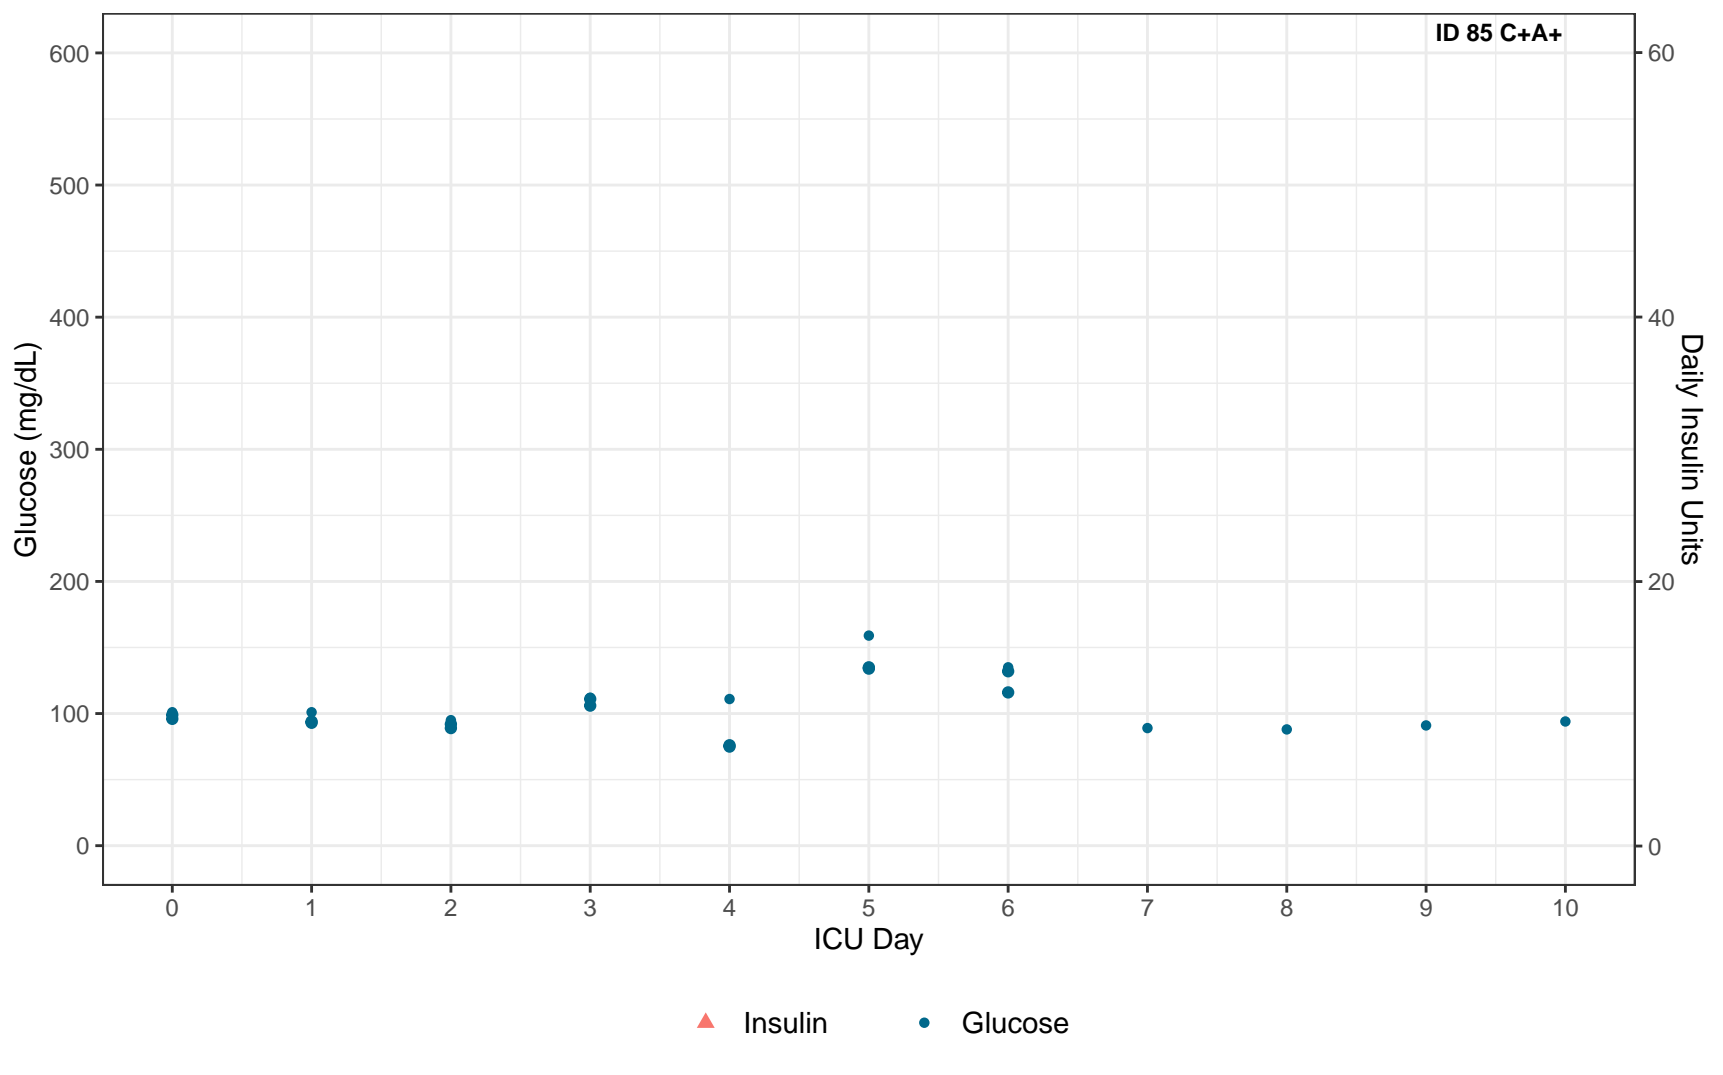

ID 86 C+A+

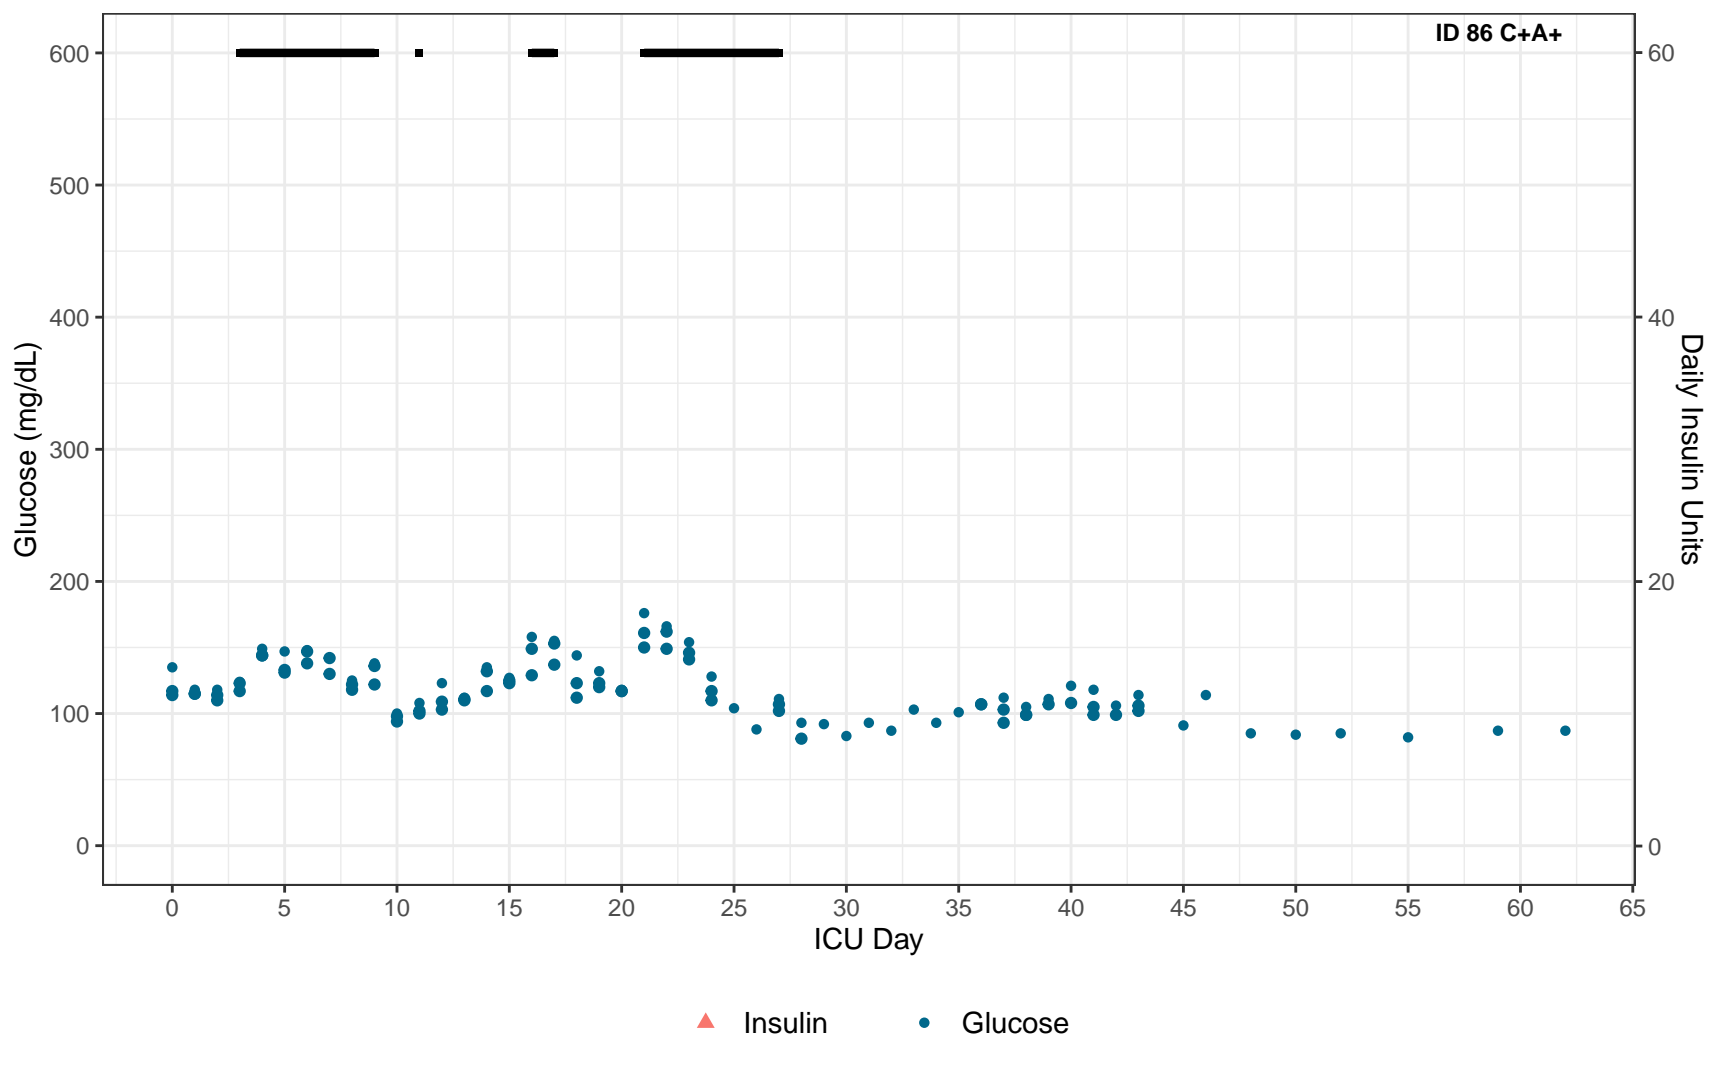

ID 87 C+A+

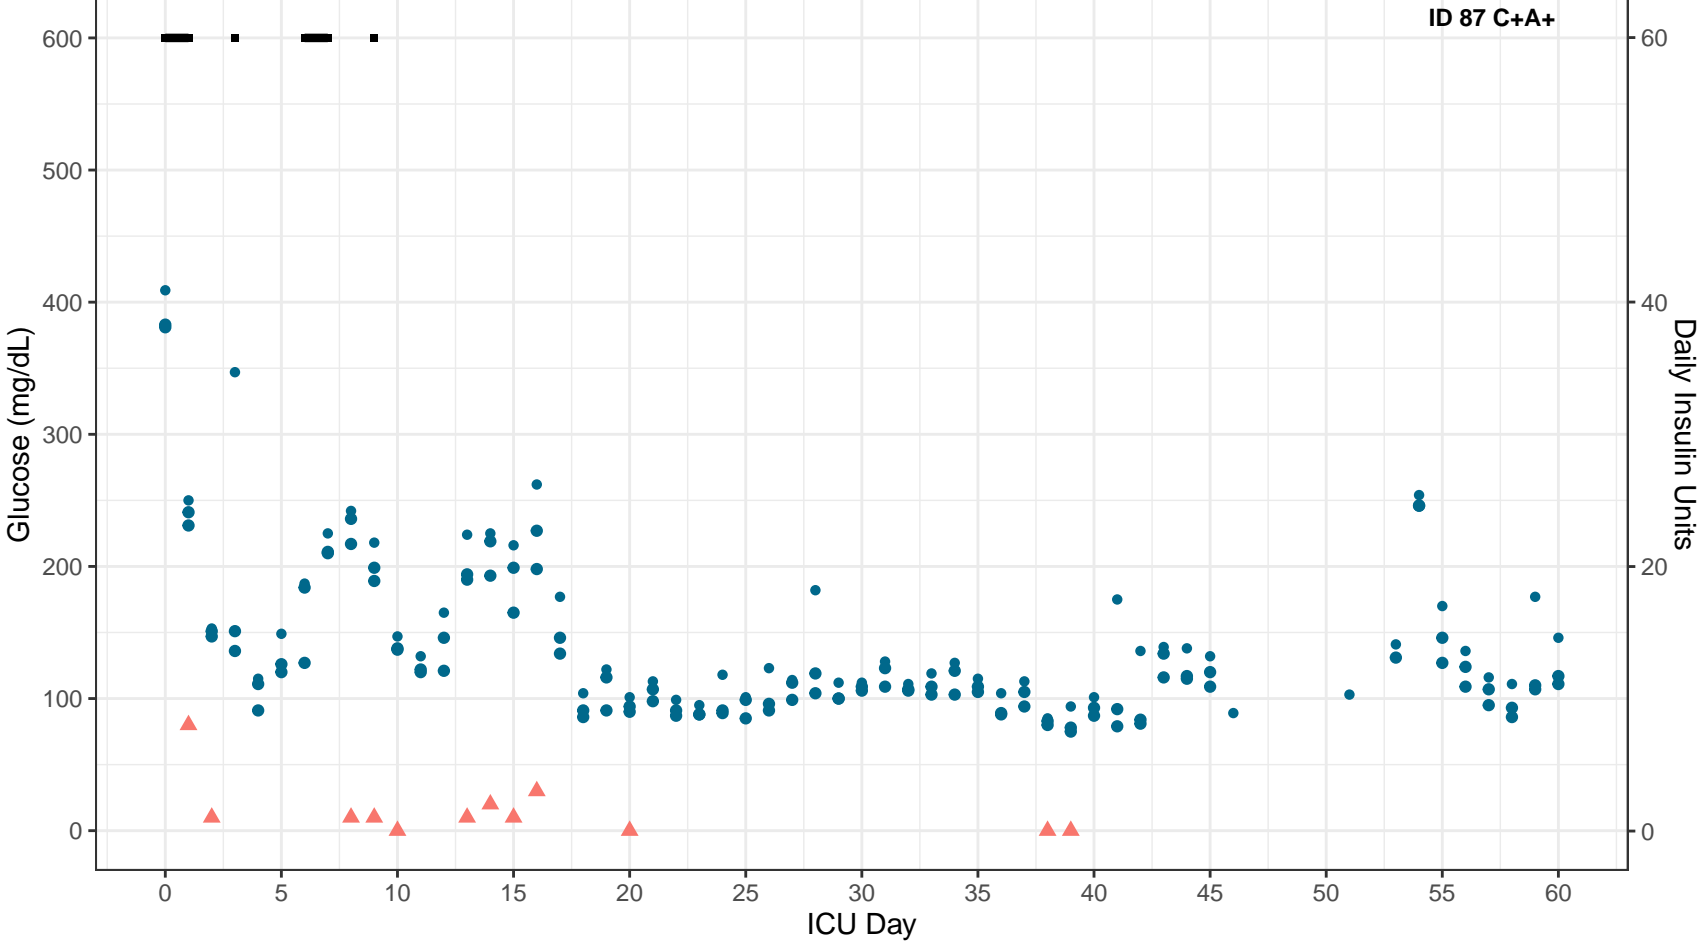

▲ Insulin      ● Glucose

ID 88 C+A+

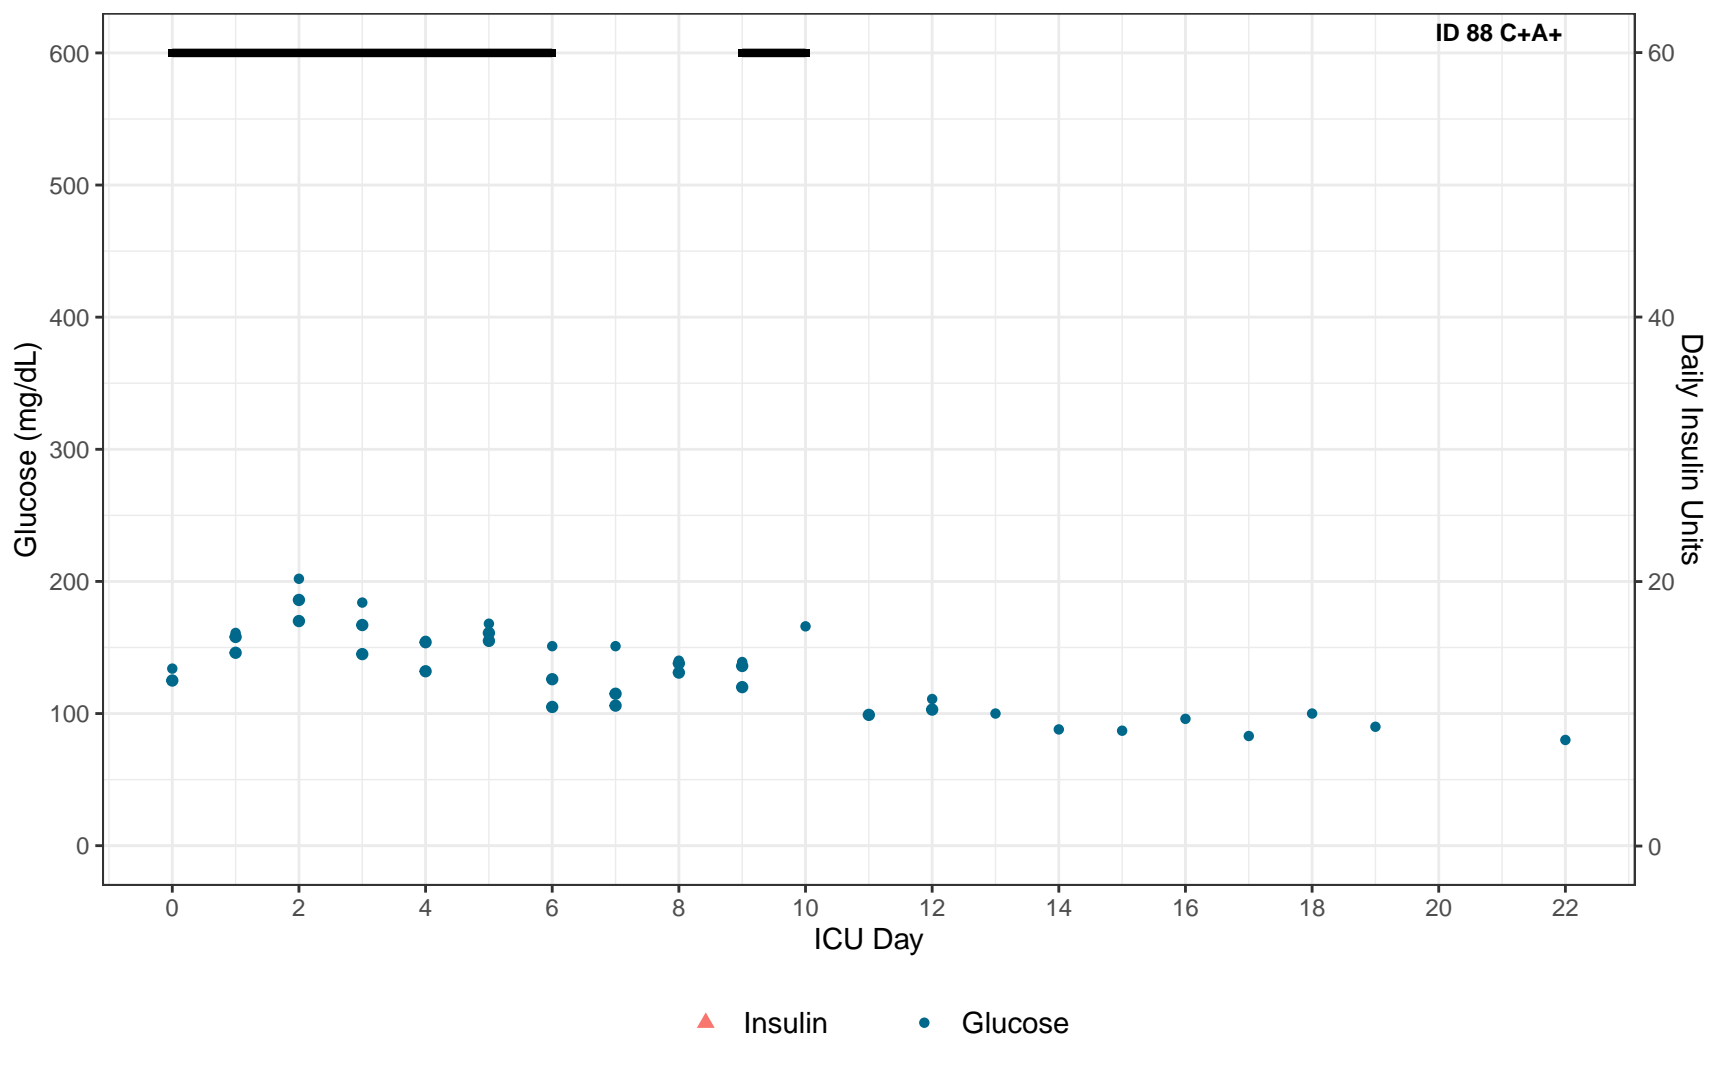

ID 89 C+A+

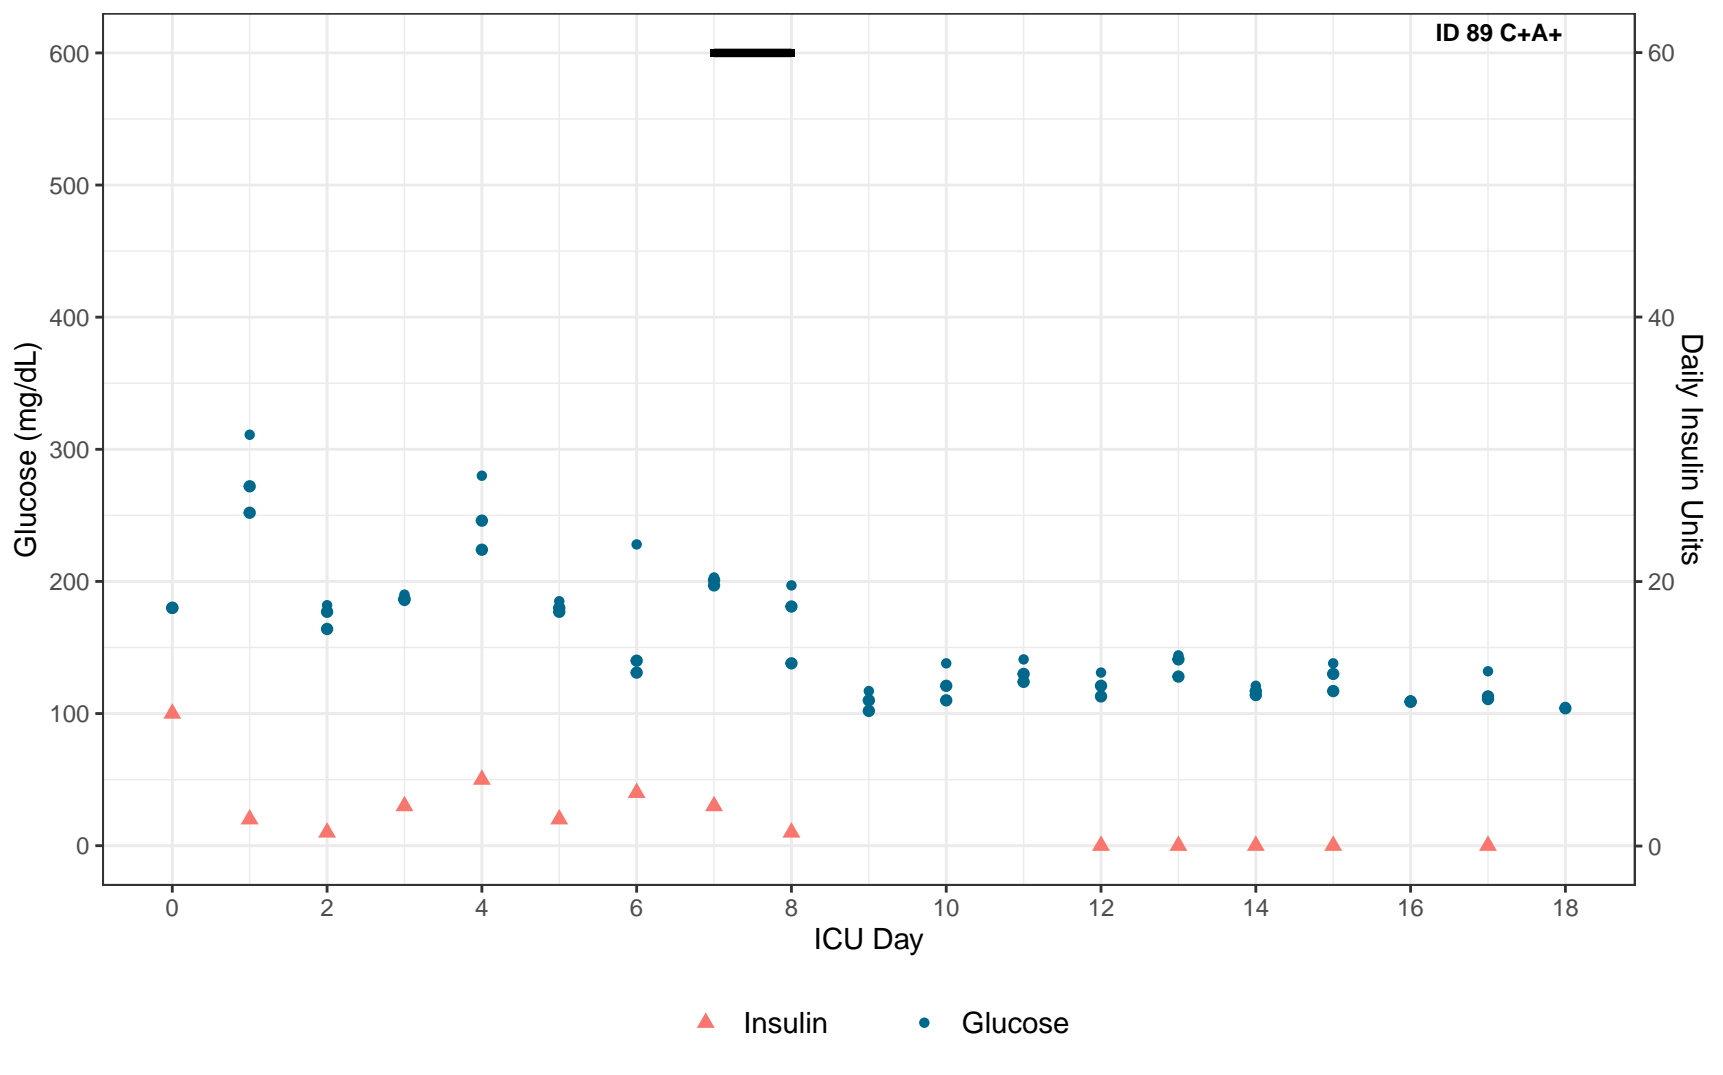

ID 90 C+A+

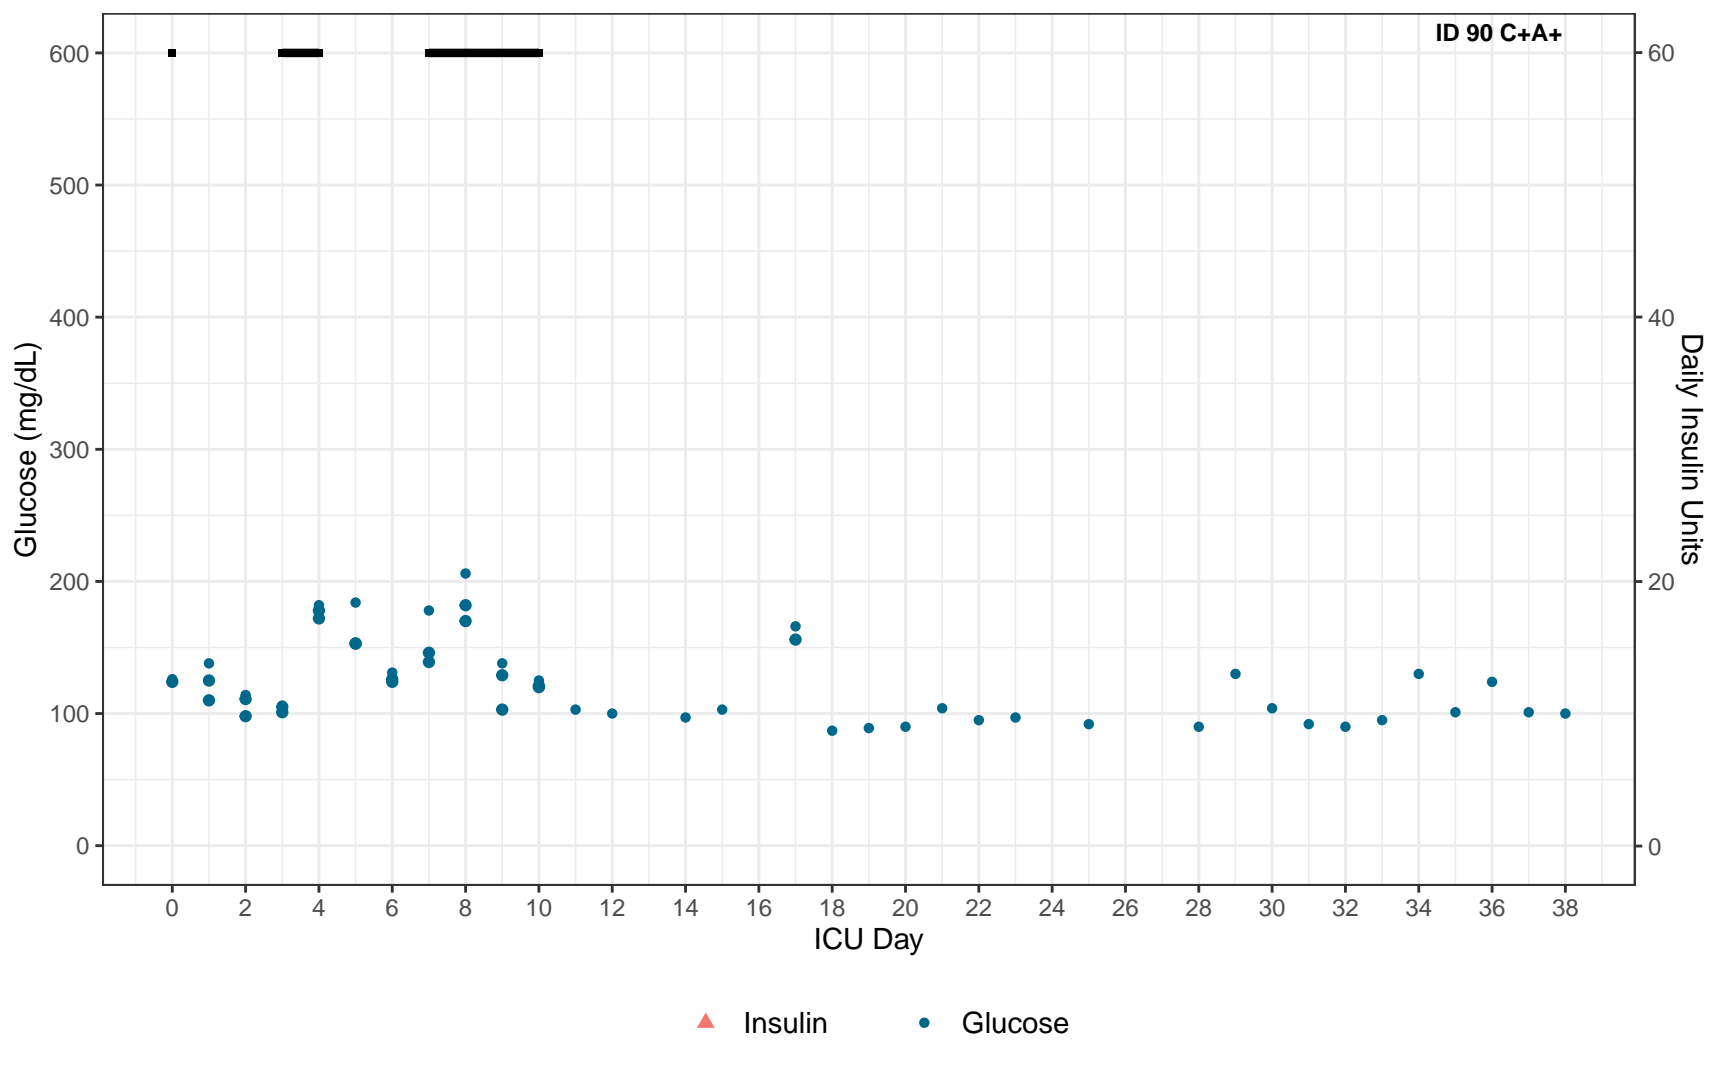



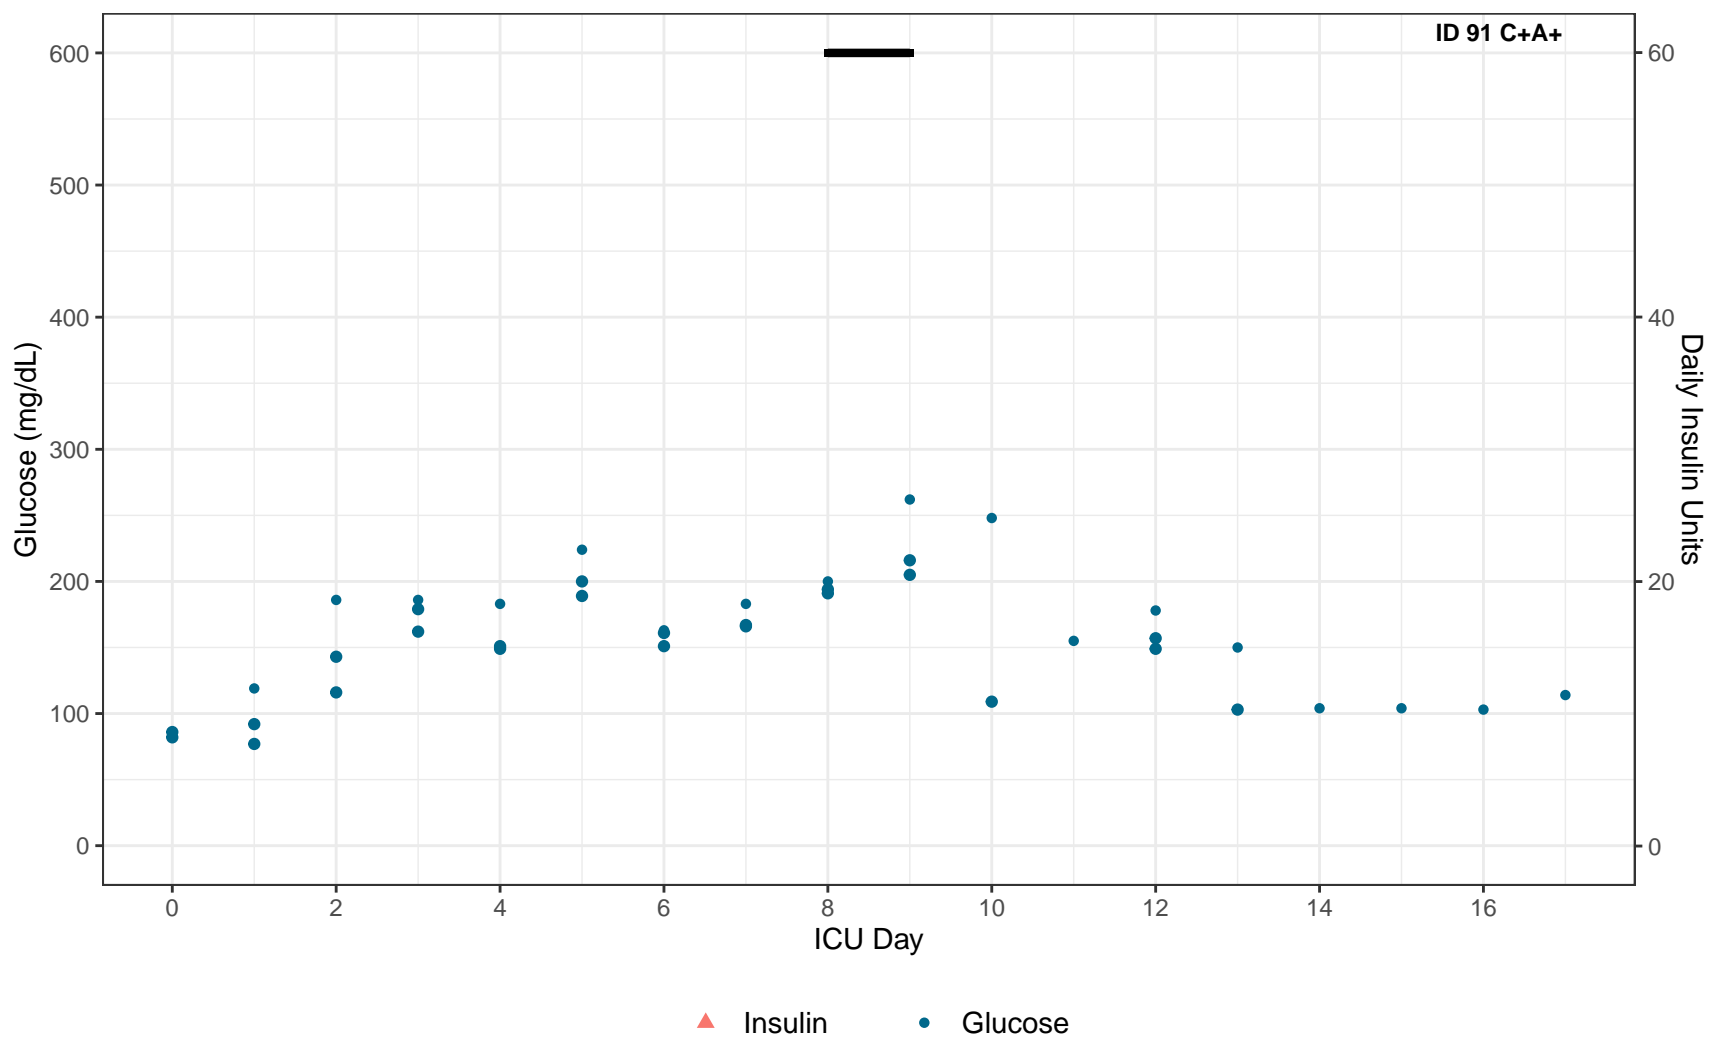

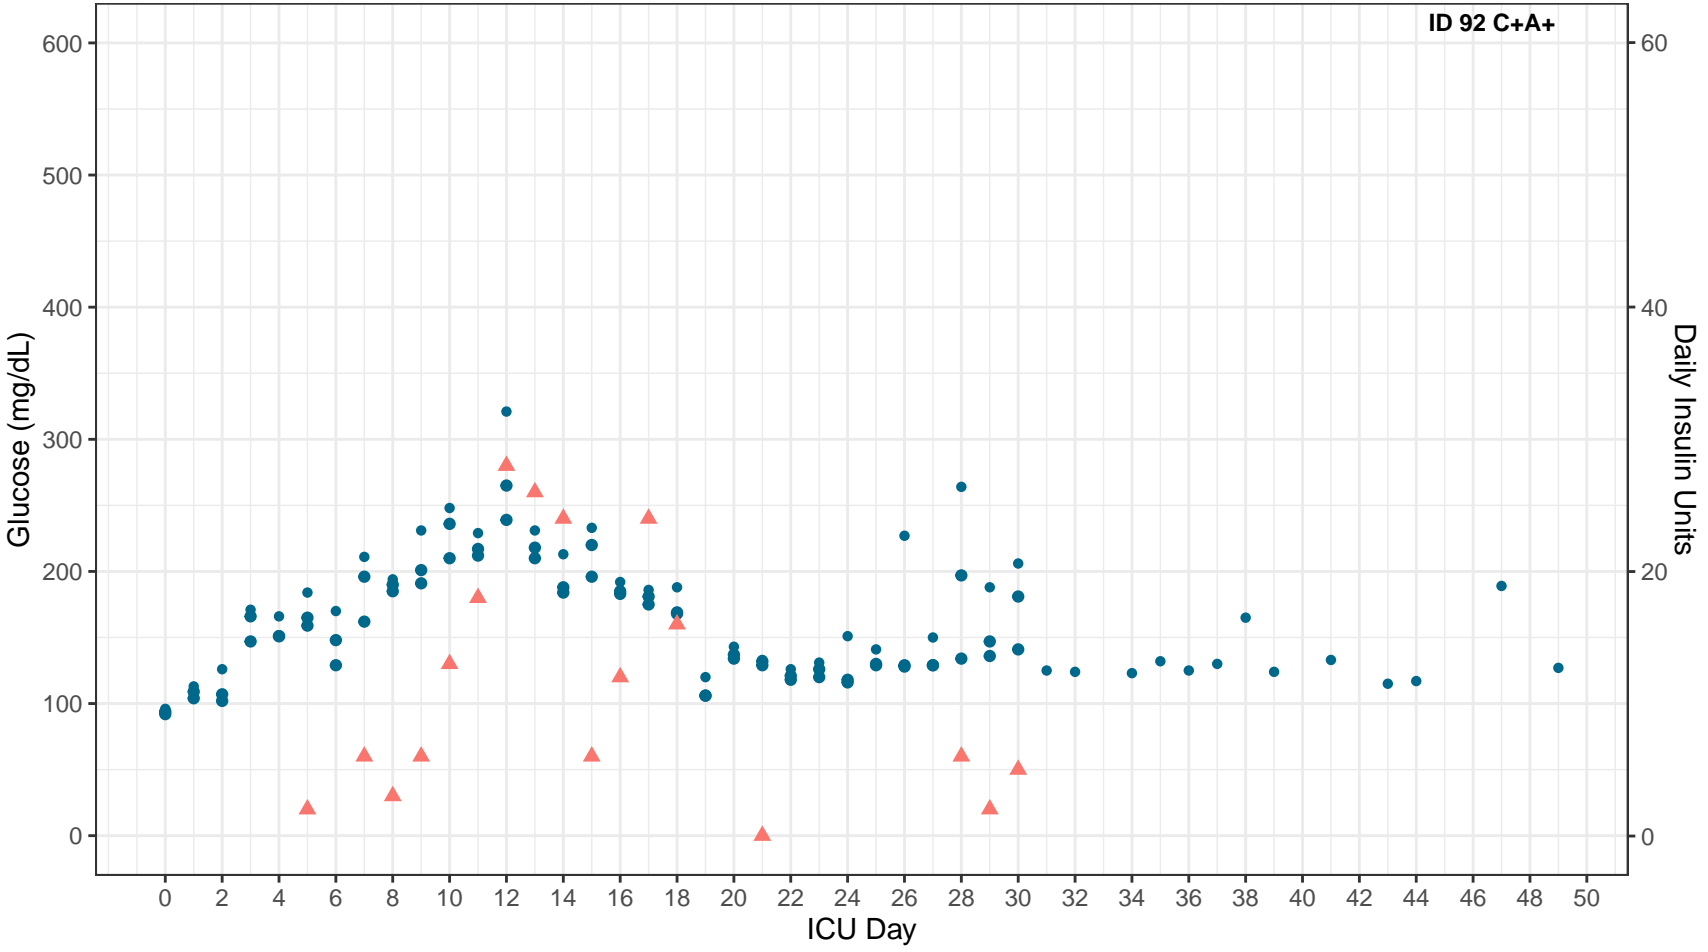

▲ Insulin      ● Glucose

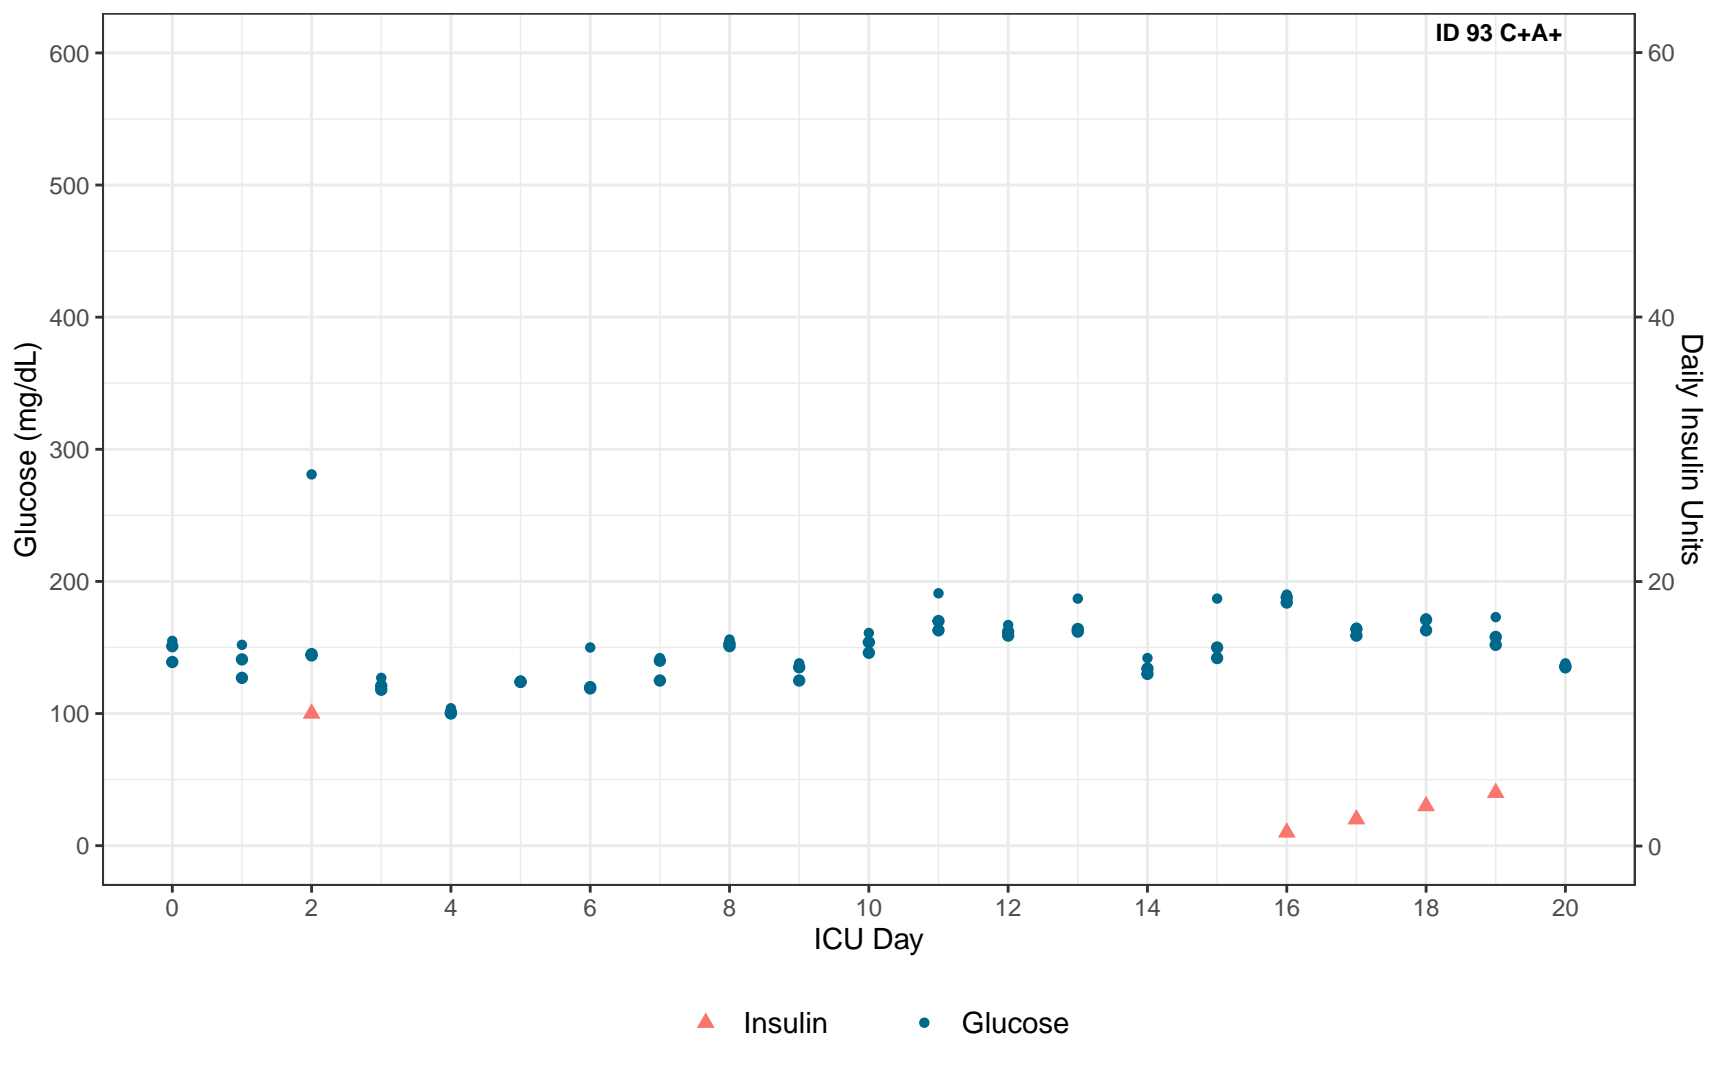

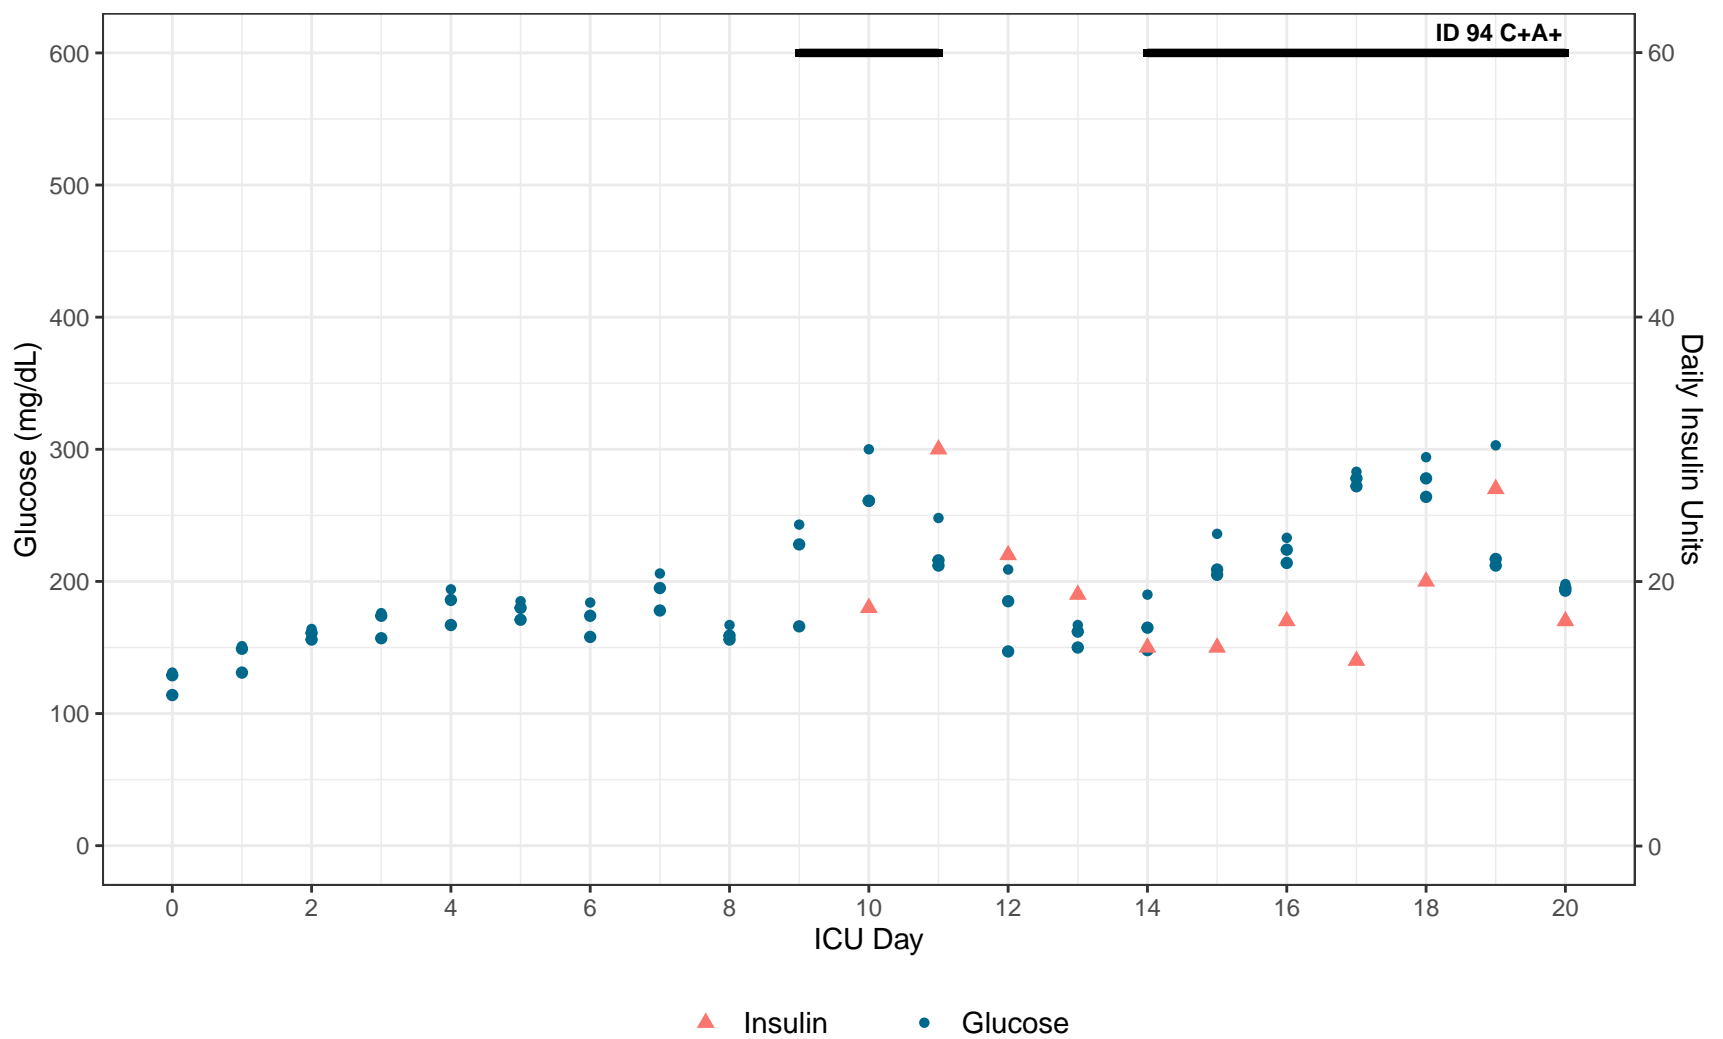

ID 95 C+A+

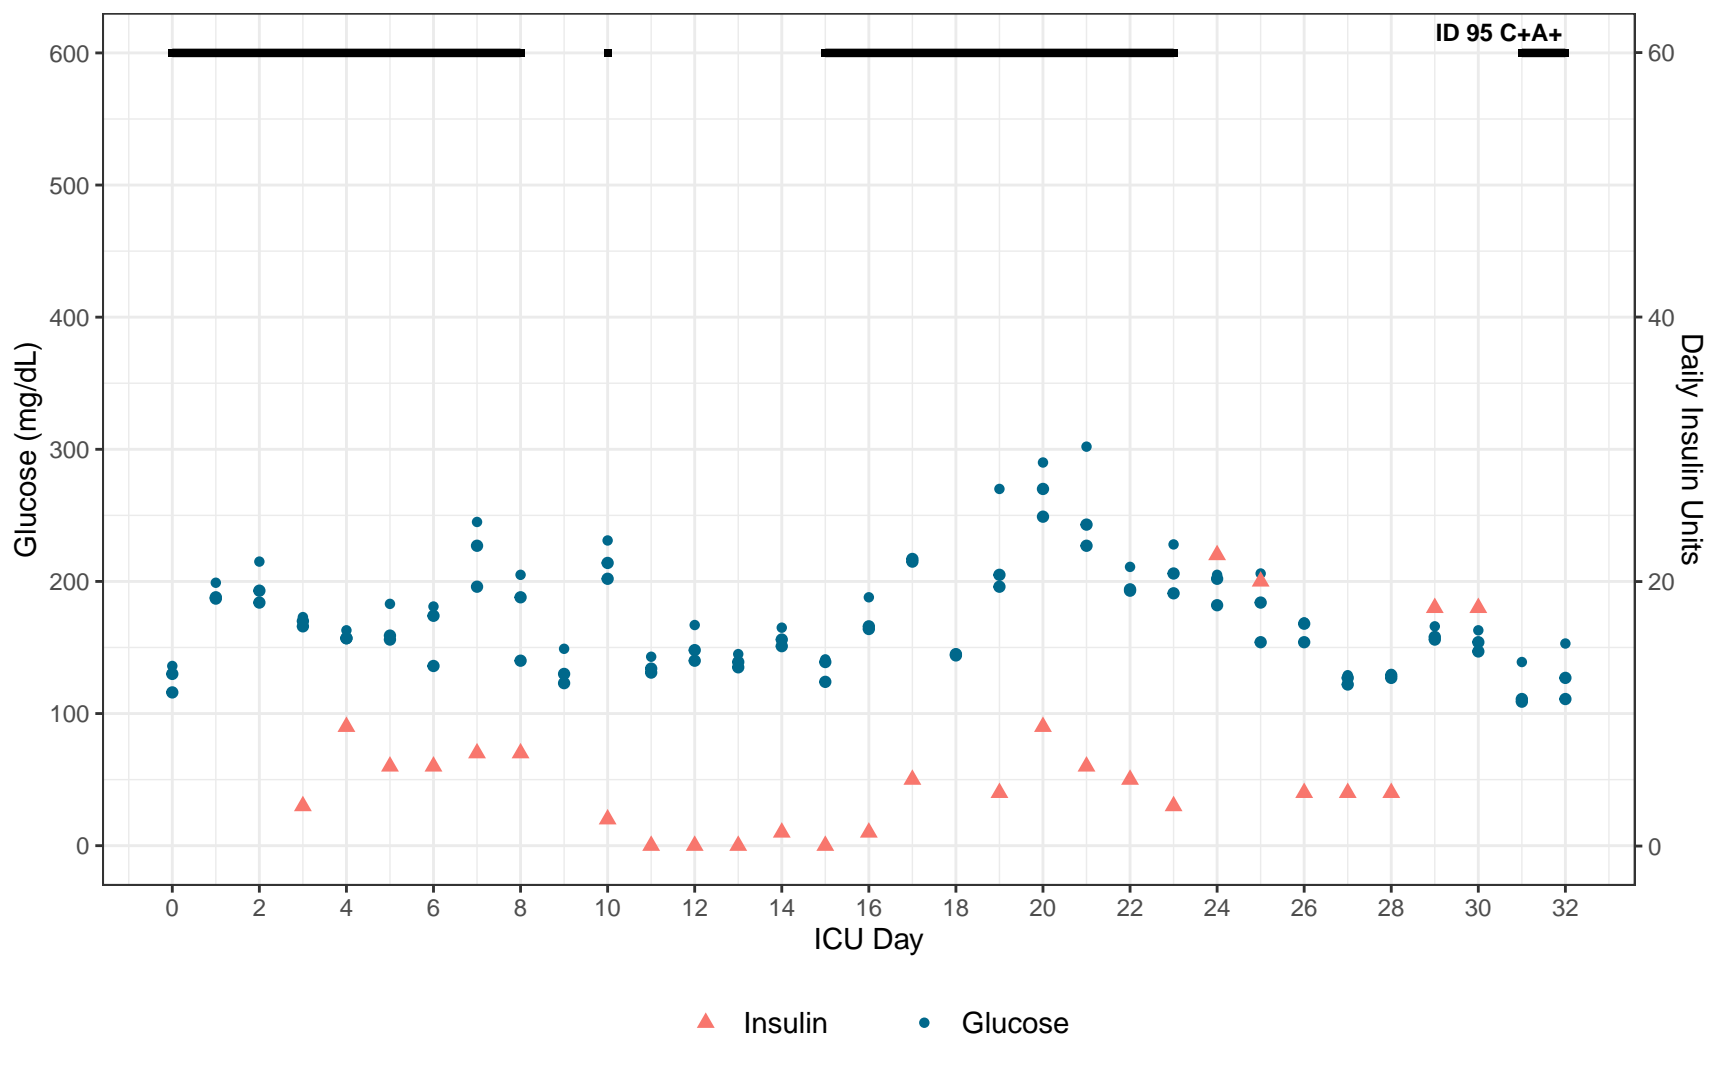

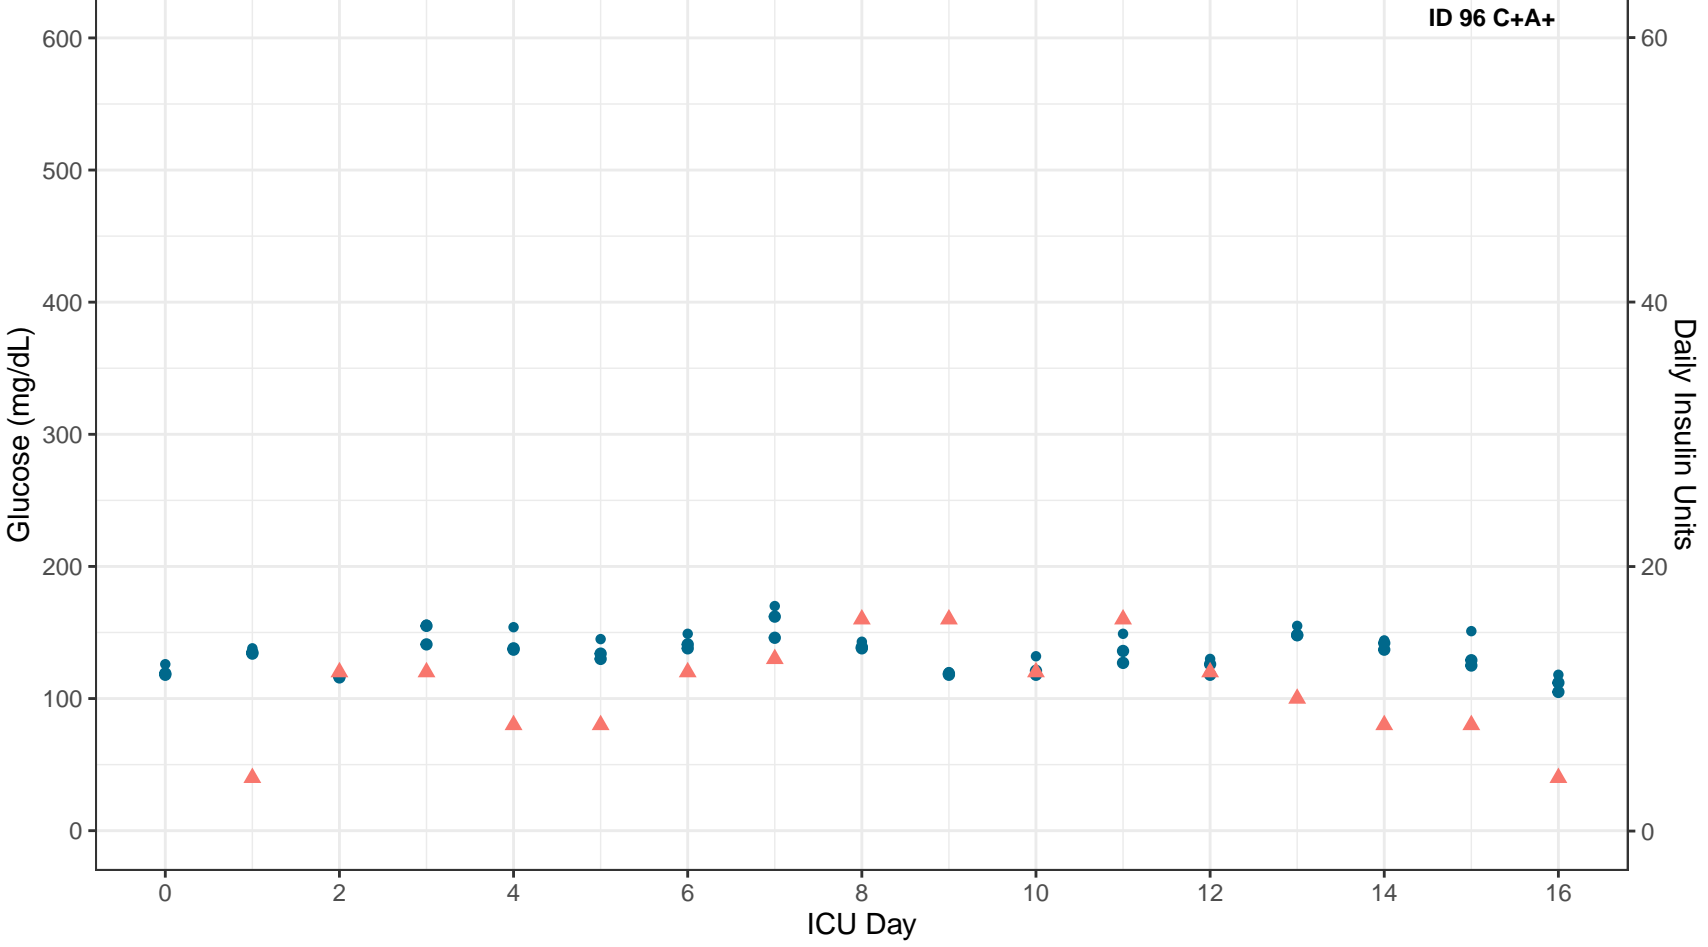

▲ Insulin      ● Glucose

ID 97 C+A+

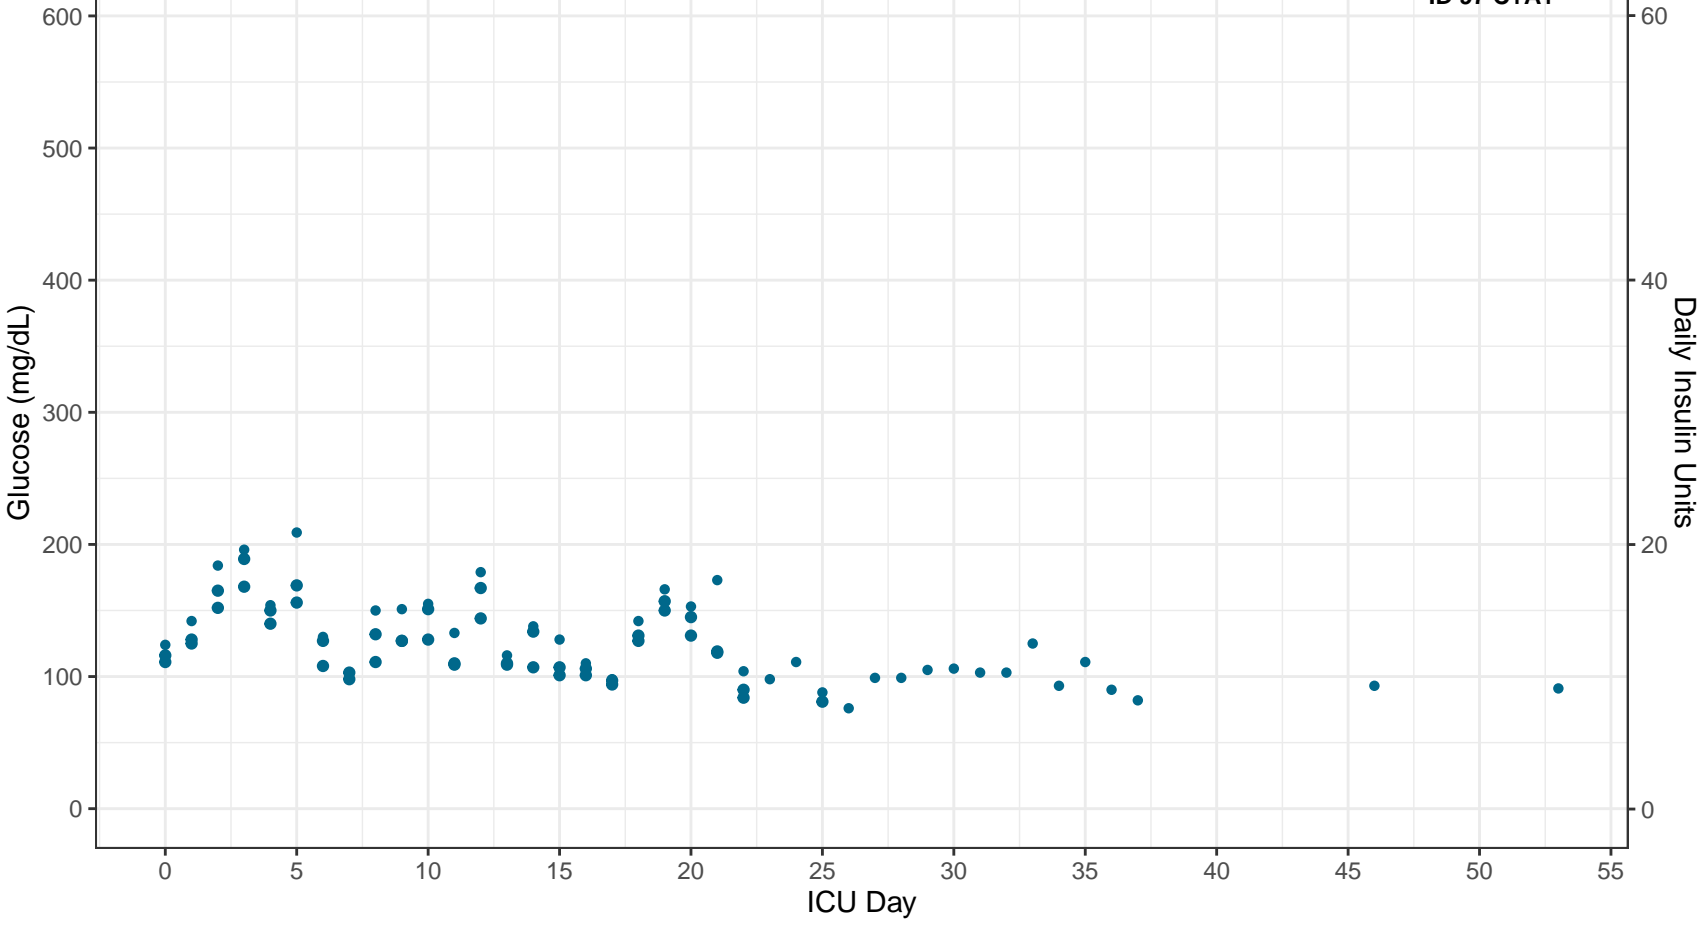

▲ Insulin      ● Glucose

ID 98 C+A+

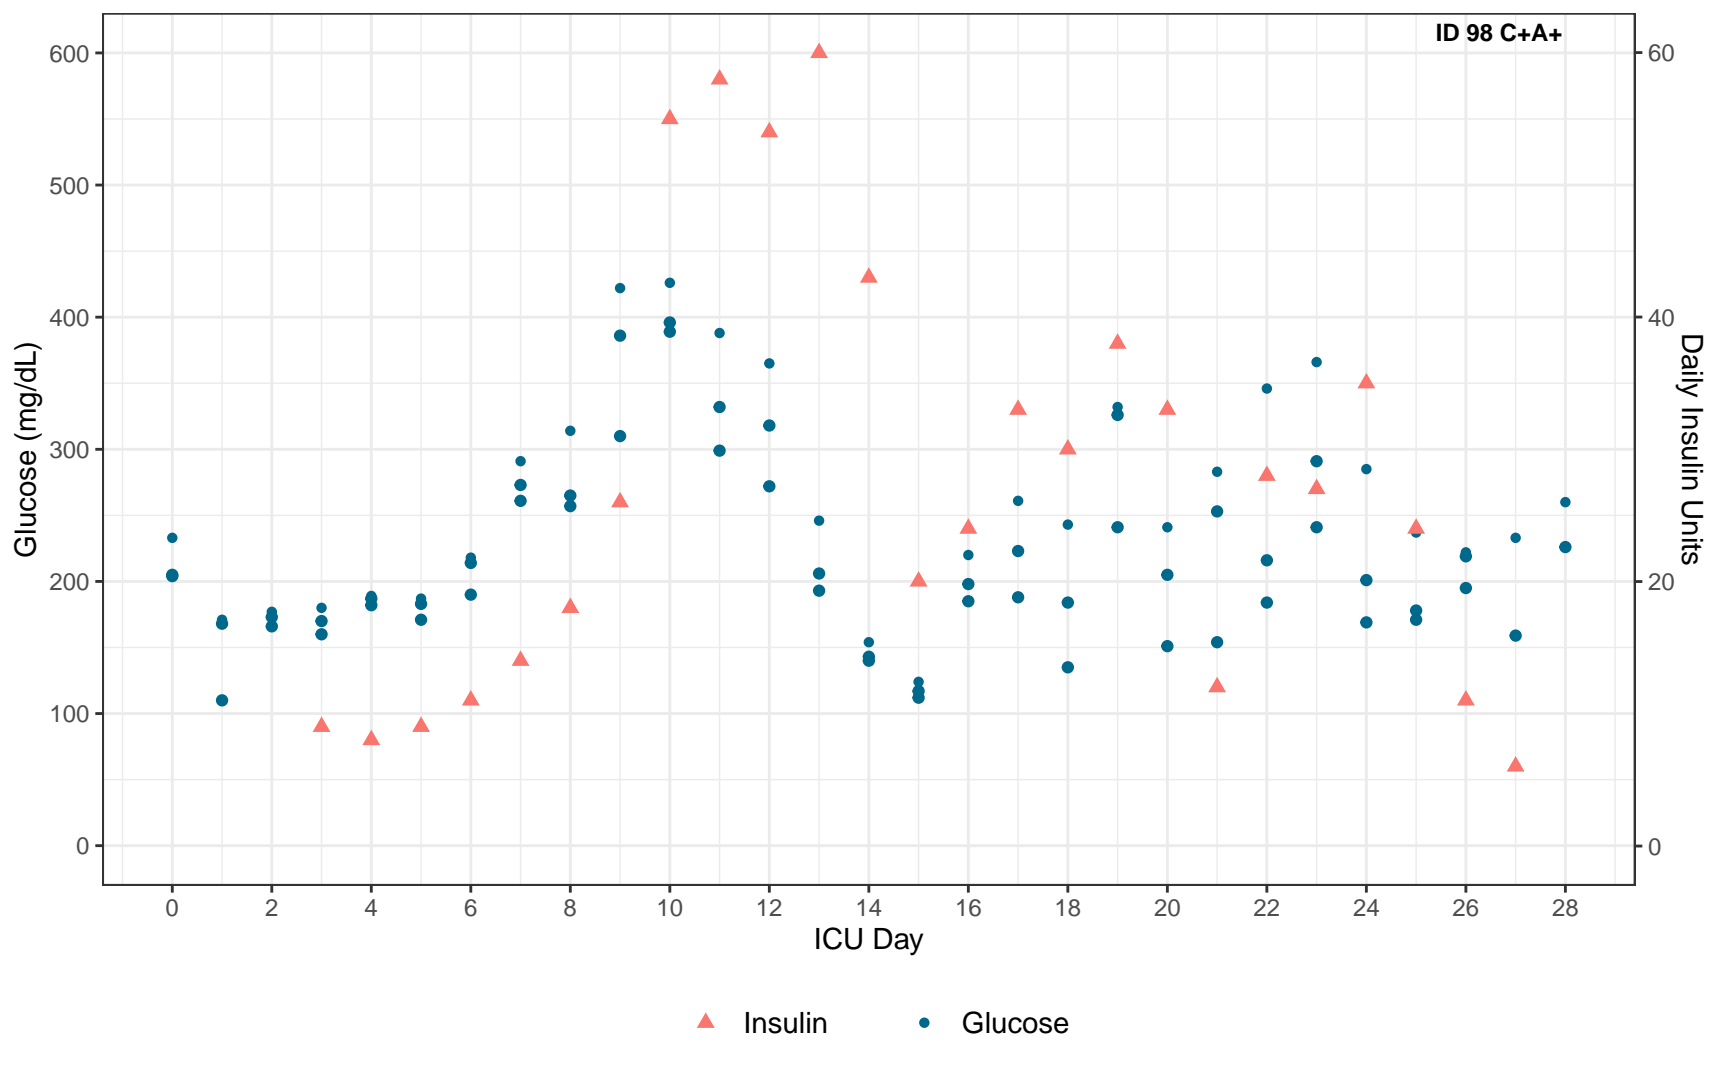



ID 99 C+A+

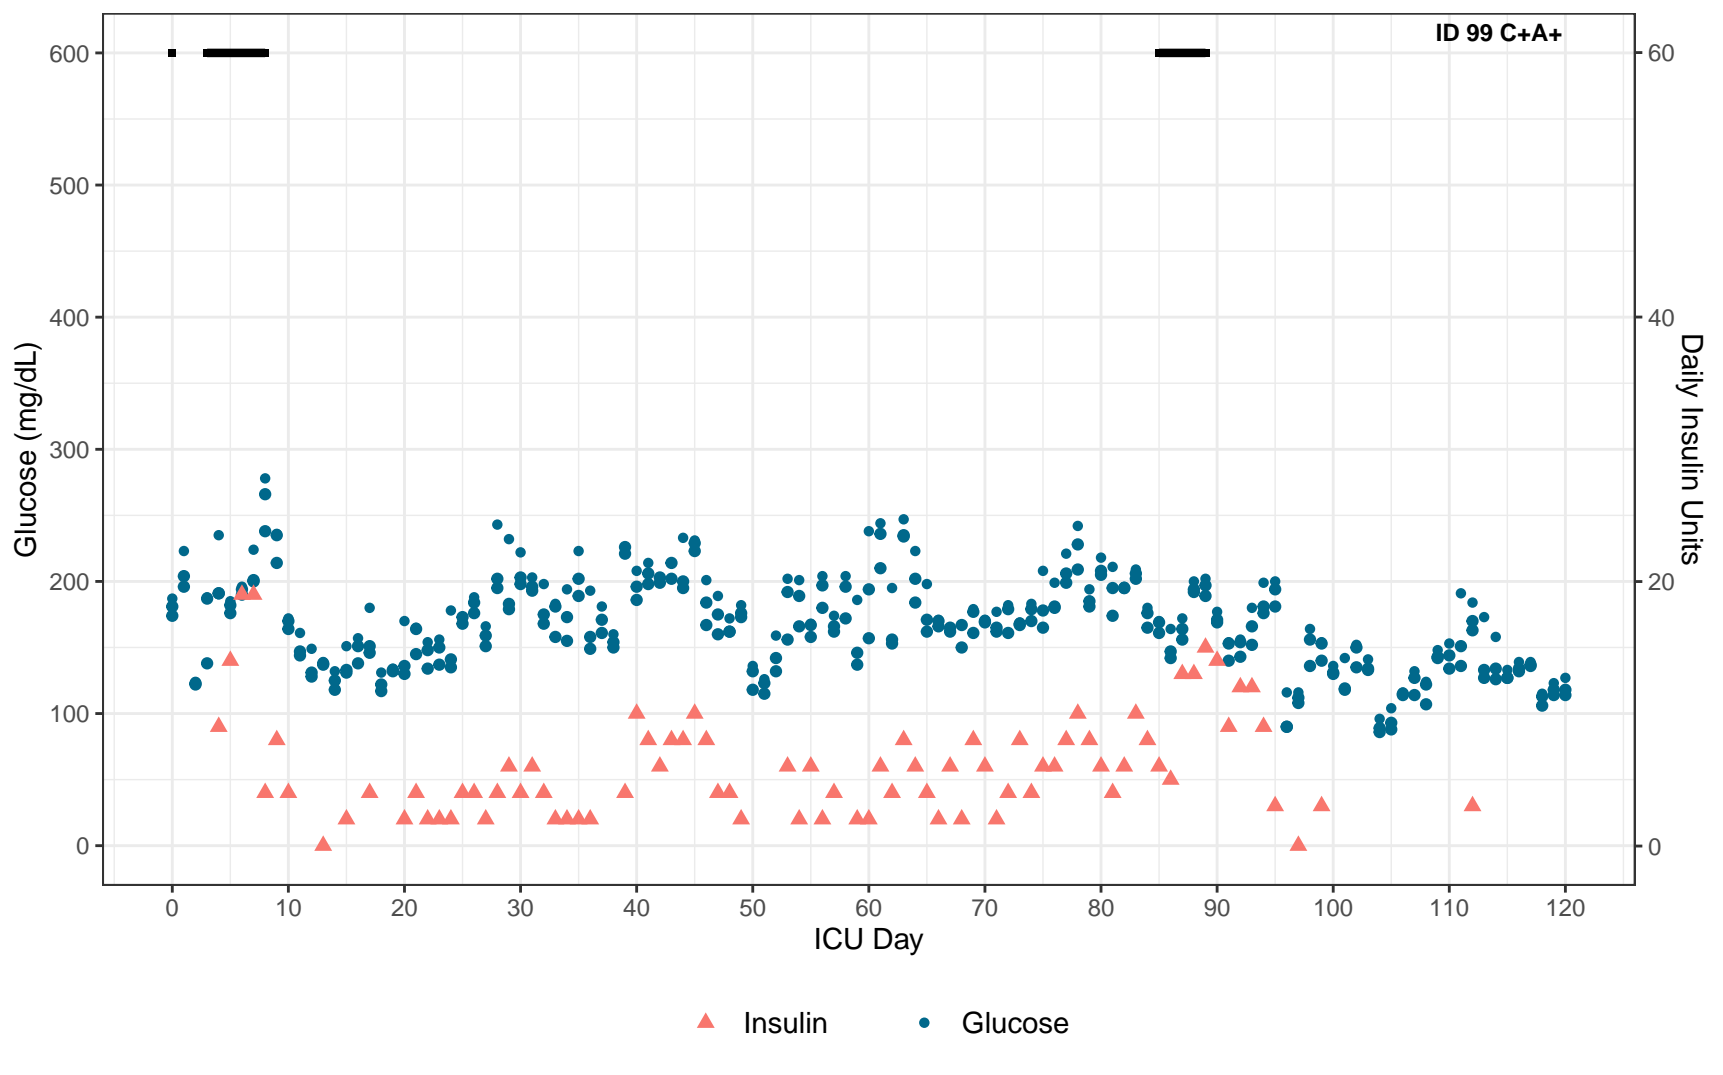

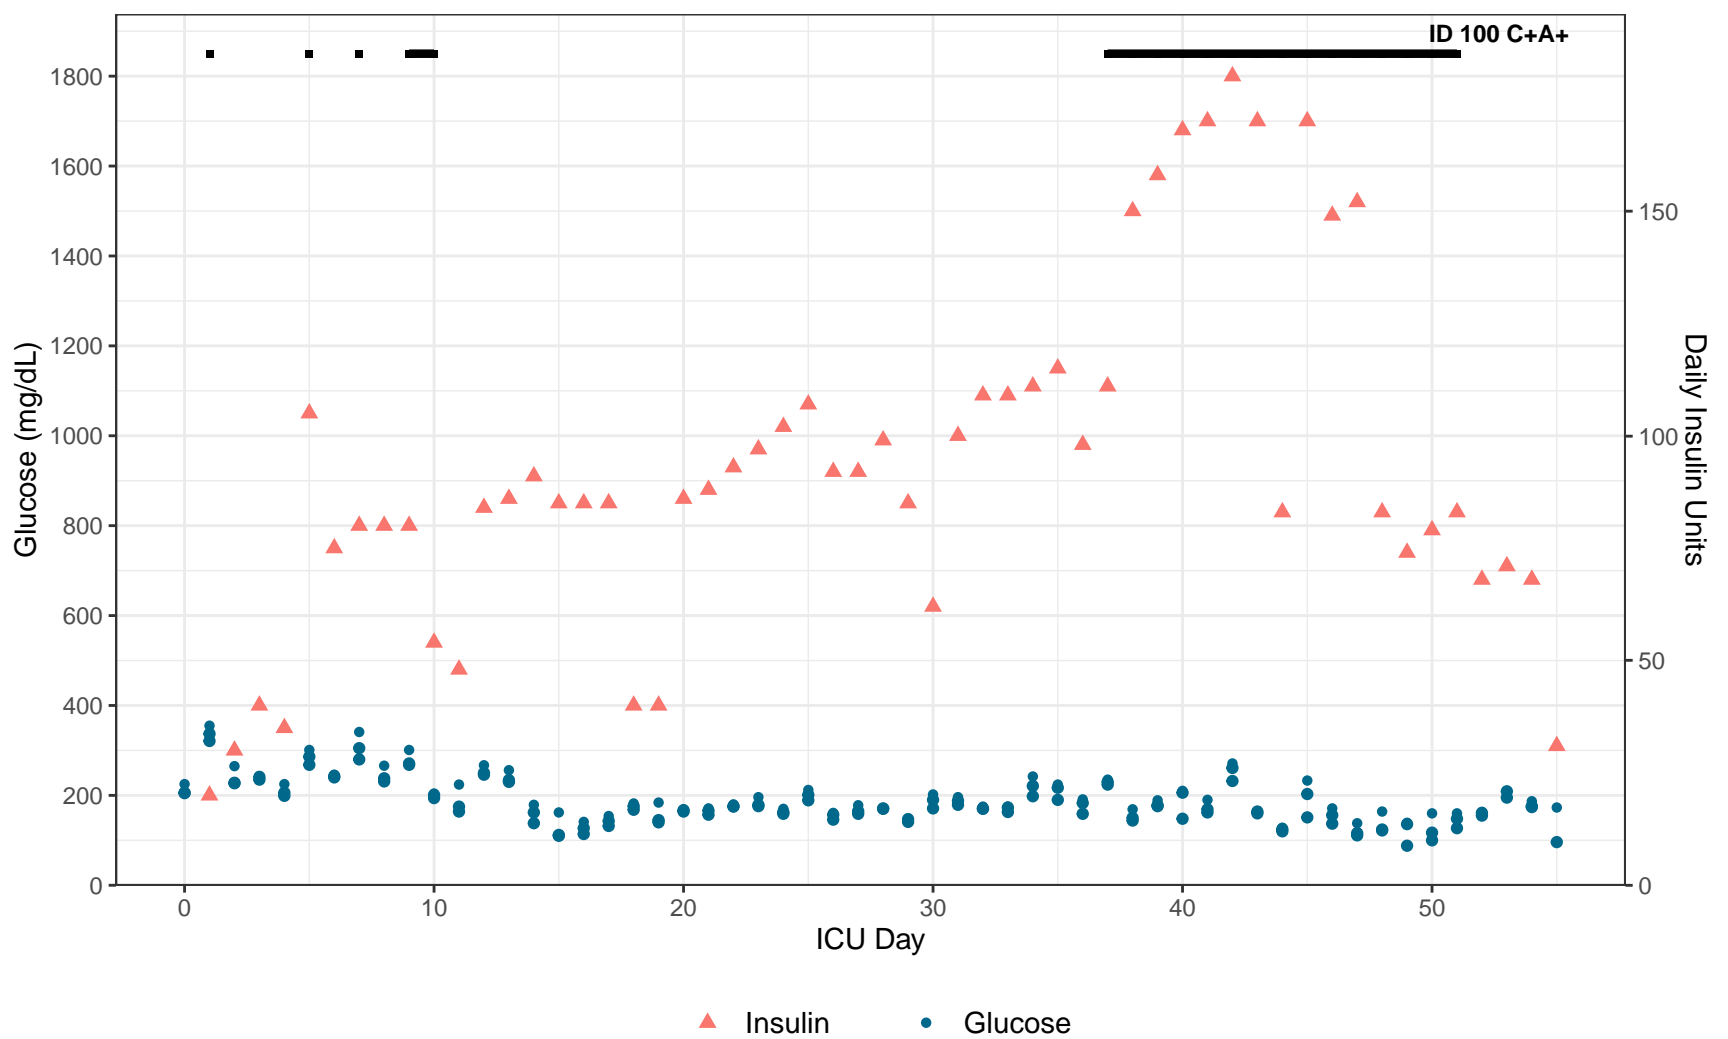

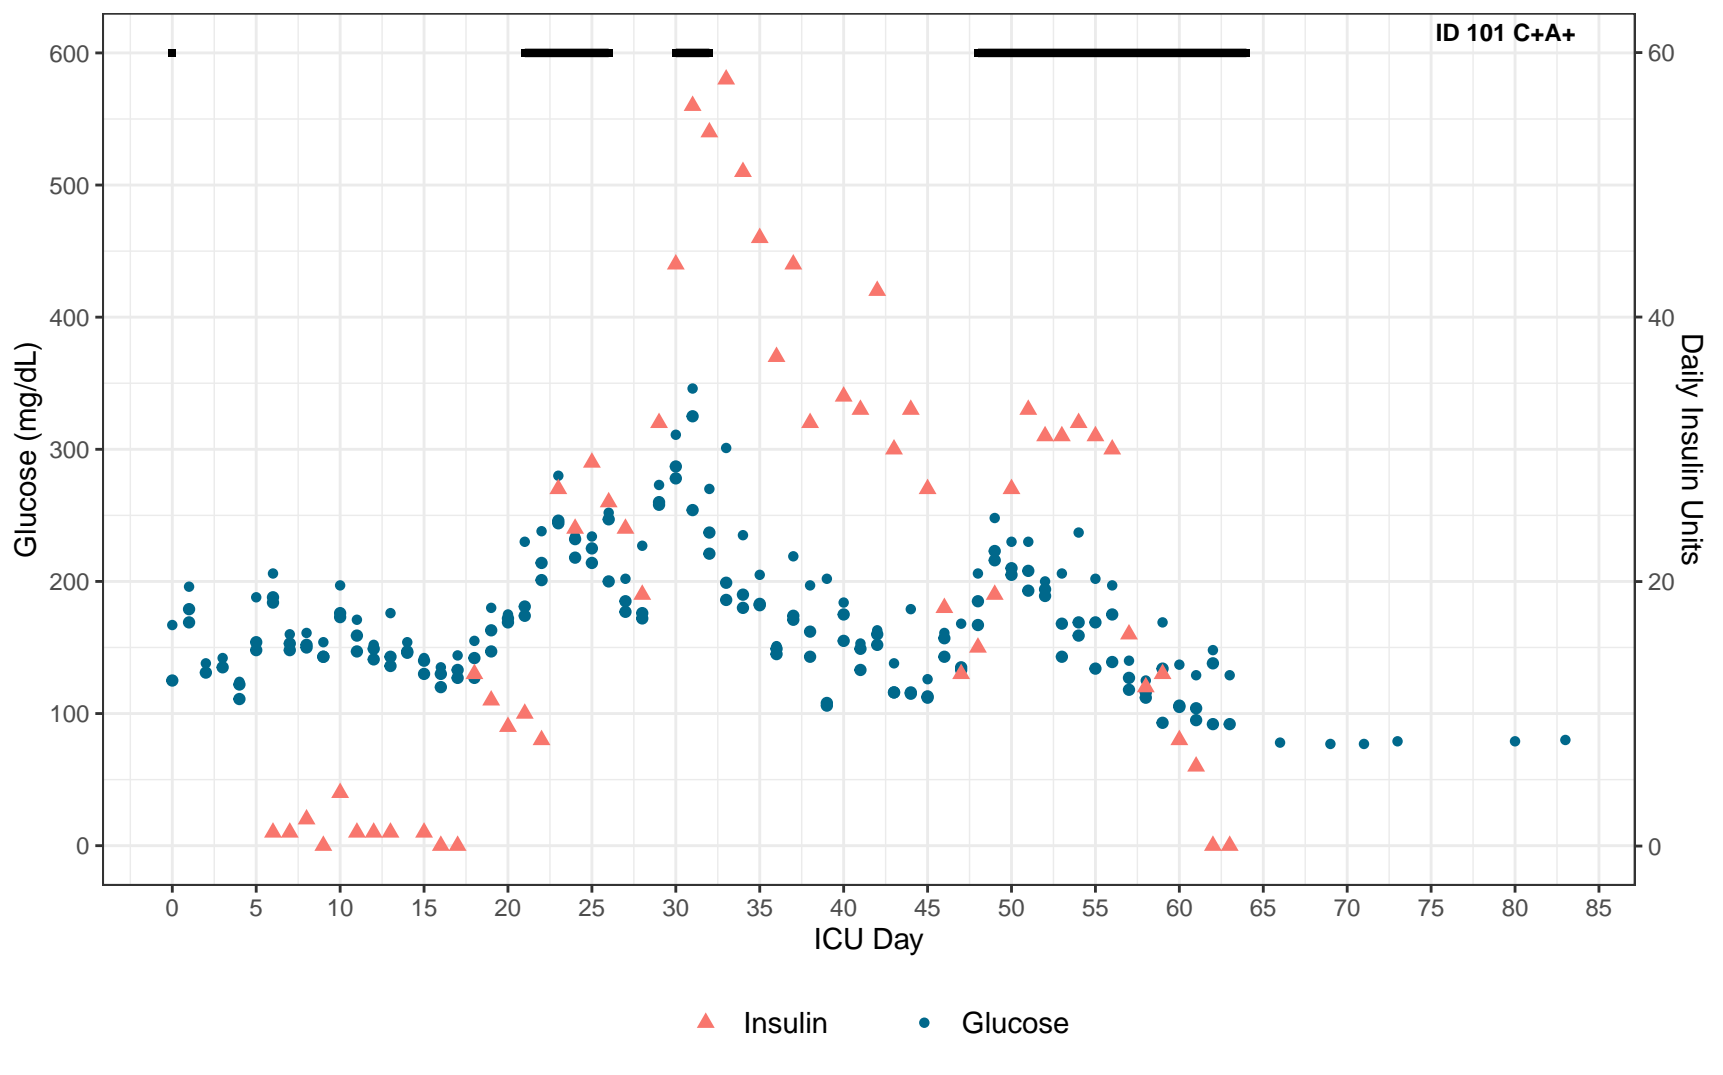

Supplement: Supplementary file [file media-1.pdf]
